# Supplementary material
Source: HighWire-hosted journal article supplement (https://bmjopen.bmj.com/content/11/3/e042753)
Supplement: inline-supplementary-material-1 [file inline-supplementary-material-1.pdf]

# **Pregnancy outcomes and socioeconomic inequalities in the United Kingdom and Republic of Ireland: A systematic review and meta-analysis**

## **Supplementary material**

Contents

Supplementary appendices are listed in the order they are referred to in the paper

Contents

Supplementary appendix S1: MOOSE Statement<sup>1</sup> – reporting checklist for authors, editors, and reviewers of meta-analyses of observational studies .....3

Supplementary appendix S2: Search strategy for electronic databases .....5

Supplementary appendix S3: Grey literature sources .....25

Supplementary appendix S4: Data extraction components .....26

Supplementary appendix S5: Contact with study authors to request additional information .....27

Supplementary appendix S6: Newcastle-Ottawa scale .....29

Supplementary appendix S7: List of excluded articles .....31

Supplementary appendix S8: Duplicate datasets .....77

Supplementary appendix S9: Newcastle-Ottawa quality scores for all included studies.....81

Supplementary appendix S10: Occupational classifications.....85

Supplementary appendix S11: Associations between socioeconomic inequalities and pregnancy outcomes .....87

Supplementary appendix S12: Additional meta-analyses comparisons.....105

Supplementary appendix S13: Quality of evidence assessed using GRADE for occupation/social class and adverse pregnancy outcomes .....127

Supplementary appendix S1: MOOSE Statement<sup>1</sup> – reporting checklist for authors, editors, and reviewers of meta-analyses of observational studies

| Reporting Criteria                                                                                                | Reported (Yes/No) | Reported on Page                      |
|-------------------------------------------------------------------------------------------------------------------|-------------------|---------------------------------------|
| <b>Reporting of Background</b>                                                                                    |                   |                                       |
| Problem definition                                                                                                | Yes               | Pg. 2-3                               |
| Hypothesis statement                                                                                              | Yes               | Pg. 3                                 |
| Description of Study Outcome(s)                                                                                   | Yes               | Pg. 3-4                               |
| Type of exposure or intervention used                                                                             | Yes               | Pg. 3                                 |
| Type of study design used                                                                                         | Yes               | Pg. 4                                 |
| Study population                                                                                                  | Yes               | Pg. 3                                 |
| <b>Reporting of Search Strategy</b>                                                                               |                   |                                       |
| Qualifications of searchers (e.g., librarians and investigators)                                                  | Yes               | Pg. 3                                 |
| Search strategy, including time period included in the synthesis and keywords                                     | Yes               | Supplementary appendix S2             |
| Effort to include all available studies, including contact with authors                                           | Yes               | Supplementary appendix S5             |
| Databases and registries searched                                                                                 | Yes               | Supplementary appendix S2 and S3      |
| Search software used, name and version, including special features used (e.g., explosion)                         | Yes               | Pg. 4                                 |
| Use of hand searching (e.g., reference lists of obtained articles)                                                | Yes               | Pg. 3                                 |
| List of citations located and those excluded, including justification                                             | Yes               | Table 1, supplementary appendix S7    |
| Method for addressing articles published in languages other than English                                          | Yes               | Pg.17                                 |
| Method of handling abstracts and unpublished studies                                                              | Yes               | Supplementary appendix S5             |
| Description of any contact with authors                                                                           | Yes               | Supplementary appendix S5             |
| <b>Reporting of Methods</b>                                                                                       |                   |                                       |
| Description of relevance or appropriateness of studies assembled for assessing the hypothesis to be tested        | Yes               | Table 1                               |
| Rationale for the selection and coding of data (e.g., sound clinical principles or convenience)                   | Yes               | Pg. 4-5                               |
| Documentation of how data were classified and coded (e.g., multiple raters, blinding, and interrater reliability) | Yes               | Pg. 4; supplementary appendix S4      |
| Assessment of confounding (e.g., comparability of cases and controls in studies where appropriate)                | Yes               | Pg. 4-5, 17                           |
| Assessment of study quality, including                                                                            | Yes               | Pg. 4; supplementary appendix S6/9/13 |

|                                                                                                                                                                                                                                                                                |     |                                                                          |
|--------------------------------------------------------------------------------------------------------------------------------------------------------------------------------------------------------------------------------------------------------------------------------|-----|--------------------------------------------------------------------------|
| blinding of quality assessors; stratification or regression on possible predictors of study results                                                                                                                                                                            |     |                                                                          |
| Assessment of heterogeneity                                                                                                                                                                                                                                                    | Yes | Throughout results section: pg. 5-16; supplementary appendix S12         |
| Description of statistical methods (e.g., complete description of fixed or random effects models, justification of whether the chosen models account for predictors of study results, dose-response models, or cumulative meta-analysis) in sufficient detail to be replicated | Yes | Protocol<br>Pg. 4-5                                                      |
| Provision of appropriate tables and graphics                                                                                                                                                                                                                                   | Yes | Figures 1-5; Table 1; Supplementary appendix S9/S11                      |
| <b>Reporting of Results</b>                                                                                                                                                                                                                                                    |     |                                                                          |
| Table giving descriptive information for each study included                                                                                                                                                                                                                   | Yes | Table 1                                                                  |
| Results of sensitivity testing (e.g., subgroup analysis)                                                                                                                                                                                                                       | Yes | Throughout results section: pg. 5-16; supplementary appendix S12         |
| Indication of statistical uncertainty of findings                                                                                                                                                                                                                              | Yes | Figures 2-5; supplementary appendix S12                                  |
| <b>Reporting of Discussion</b>                                                                                                                                                                                                                                                 |     |                                                                          |
| Quantitative assessment of bias (e.g., publication bias)                                                                                                                                                                                                                       | Yes | Throughout results section: pg. 5-16; Pg. 18; Supplementary appendix S12 |
| Justification for exclusion (e.g., exclusion of non-English-language citations)                                                                                                                                                                                                | Yes | Pg. 17; Supplementary appendix S7                                        |
| Assessment of quality of included studies                                                                                                                                                                                                                                      | Yes | Pg. 17-8; Supplementary appendix S9, S13                                 |
| <b>Reporting of Conclusions</b>                                                                                                                                                                                                                                                |     |                                                                          |
| Consideration of alternative explanations for observed results                                                                                                                                                                                                                 | Yes | Pg. 16-20                                                                |
| Generalization of the conclusions (i.e., appropriate for the data presented and within the domain of the literature review)                                                                                                                                                    | Yes | Pg. 16-20                                                                |
| Guidelines for future research                                                                                                                                                                                                                                                 | Yes | Pg. 19-20                                                                |
| Disclosure of funding source                                                                                                                                                                                                                                                   | Yes | Pg. 19-20                                                                |

**Footnote:**

1. MOOSE Checklist for meta-analysis of observational studies, adapted from PRISMA checklist.

## Supplementary appendix S2: Search strategy for electronic databases

Nine electronic databases were searched between 1<sup>st</sup> January 1999 and 7<sup>th</sup> August 2019 (host sites given in parentheses): Medline (Ovid), Embase (Ovid), Scopus (Elsevier), Applied Social Sciences Index and Abstracts (Cambridge Scientific Abstracts), Cumulative Index to Nursing and Allied Health Literature (CINAHL; EBSCOhost), PsycINFO (Ovid), the British Nursing Index, the Midwives Information and Resource Service (MIDRIS) and Google Scholar (first 10 pages).

ASSIA search

```
(( (TITLE-
ABS (pregnan* OR parturition OR gravidity OR parity OR fetus OR foetus OR fetal OR foetal
OR prenatal OR {pre natal} OR antenatal OR {ante natal} OR antepartum OR {ante
partum} OR postnatal OR {post natal} OR postpartum OR {post partum} OR perinatal OR {peri
natal} OR peripartum OR {peri
partum} OR matern* OR mother* OR baby OR babies OR neonat* OR newborn* OR {new
born} OR birth* OR childbirth* OR preterm OR {pre term} OR gestat* ) ) AND (TITLE-
ABS (equality OR equalities OR equity OR inequality OR inequalities OR inequity OR disparity
OR disparities OR gap* OR gradient* OR unequal OR disadvantage* OR depriv* OR variation*
OR socioeconomic* OR {socio economic} OR ses OR sociodemographic OR {socio
demographic} ) ) OR TITLE-
ABS (social W/1 (adversity OR class OR factors OR capital OR disadvantage OR disparit* OR
exclusion OR inclusion OR gradient ) ) ) AND ( (TITLE-ABS (educat* OR {lifelong
learning} OR {life long learning} OR literacy OR empower* OR {social
mobility} OR (widen* W/1 participat* ) ) ) OR (TITLE-
ABS (unemploy* OR workless* OR jobless* OR occupation* {jobseeker's
allowance} OR employ* OR (job W/1 opportunit* ) OR {labour market
policy} OR (vocational W/1 (train* OR education OR rehabilitation ) ) OR {economic
activity} OR {welfare to work} OR {new deal} OR {universal credit} OR {child
benefit} OR welfare OR income OR {social welfare} OR {public assistance} ) ) ) OR (TITLE-
ABS (poverty OR income OR pay OR prosperity OR {lone parent} OR {single parent} OR {sole
parent} OR {marital separation} OR divorce OR {social security} OR {standard of
living} OR {minimum wage} OR {tax credit} OR salary OR {financial hardship} OR {welfare
benefit} OR {social welfare} OR {tax
rebate} OR deprivation OR debt OR indebtedness OR {over-
indebtedness} OR credit OR loan OR borrow OR {financial problems} ) ) ) OR (TITLE-
ABS (social W/1 (isolation OR mobility OR network* OR position* OR relationship OR security
OR insurance OR status OR stigma OR trend ) ) ) OR (TITLE-ABS ( {car
ownership} OR ( (home OR property) W/1 owner* ) OR (housing W/1 (costs OR affordability
OR tenure ) ) OR {private renting} OR {owner
occupied} OR (social W/1 (housing OR integration OR interaction ) ) OR neglect* OR overcro
wd* OR (poor W/1 (environment OR housing ) ) OR {public
housing} OR crowding ) ) ) OR ( (TITLE-
ABS ( (regenerat* OR redevelop* OR develop* OR renewal OR depriv* OR disadvantag* OR af
fluent OR poor ) W/5 (area OR neighbourhood OR neighborhood OR communit* ) ) ) OR (TITL
E-ABS ( ( (local OR urban OR {new deal} ) W/5 communit* ) OR {single regeneration
budget} OR {area based initiative} ) ) ) ) ) AND (PUBYEAR > 1998 ) ) AND (TITLE-
ABS (epidemiolog* OR (case W/3 (control OR series OR report OR stud* OR comparison ) )
OR {control group} OR cohort* OR longitudinal OR (follow-
up W/1 (study OR studies ) ) OR prospective OR retrospective OR (associat* W/3 (with OR b
```

etween )) OR prevalence OR transversal OR incidence OR ( observational W/1 ( study OR studies )) OR {cross sectional} OR {logistic model} )) AND NOT INDEX ( medline )

### **BNI**

1. PREGNANCY/ OR "PREGNANCY COMPLICATIONS"/
2. (pregnan\* OR prenatal OR "pre natal" OR antenatal OR "ante natal" OR antepartum OR "ante partum" OR postnatal OR "post natal" OR postpartum OR "post partum" OR perinatal OR "peri natal" OR peripartum OR "peri partum" OR matern\* OR birth OR childbirth OR mother OR baby OR babies OR fetal OR foetal OR neonat\* OR newborn OR "new born" OR preterm OR "pre term" OR gestat\* OR fetus OR foetus).ti,ab
3. FETUSES/
4. (1 OR 2 OR 3)
5. (equality OR equalities OR equity OR inequality OR inequalities OR inequity OR disparity OR disparities OR gap\* OR gradient\* OR unequal OR disadvantage\* OR depriv\* OR variation\* OR socioeconomic\* OR "socio economic" OR SES OR sociodemographic OR "socio demographic").ti,ab
6. (social ADJ1 (adversity OR class OR factors OR capital OR disadvantage OR disparit\* OR exclusion OR inclusion OR gradient)).ti,ab
7. "SOCIOECONOMIC FACTORS"/
8. (5 OR 6 OR 7)
9. (4 AND 8)
10. EPIDEMIOLOGY/
11. ("follow up stud\*").ti,ab
12. ("observational stud\*").ti,ab
13. (epidemiolog\* OR "case control" OR cohort\* OR longitudinal OR retrospective OR "cross sectional").ti,ab
14. ("population based stud\*").ti,ab
15. (10 OR 11 OR 12 OR 13 OR 14)
16. (9 AND 15)

### **Cinahl**

- S161 S158 AND S159 Limiters - Published Date: 19990101-; Human
- S160 S158 AND S159
- S159 Limiters - Published Date: 19990101-20191231
- S158 (S151 OR S152 OR S153 OR S154 OR S155 OR S156) AND (S18 AND S38 AND S157)
- S157 S151 OR S152 OR S153 OR S154 OR S155 OR S156
- S156 S147 OR S148 OR S149 OR S150
- S155 S130 OR S131 OR S132 OR S133 OR S134 OR S135 OR S136 OR S137 OR S138 OR S139 OR S140 OR S141 OR S142 OR S143 OR S144 OR S145 OR S146
- S154 S115 OR S116 OR S117 OR S118 OR S119 OR S120 OR S121 OR S122 OR S123 OR S124 OR S125 OR S126 OR S127 OR S128 OR S129
- S153 S82 OR S83 OR S84 OR S85 OR S86 OR S87 OR S88 OR S89 OR S90 OR S91 OR S92 OR S93 OR S94 OR S95 OR S96 OR S97 OR S98 OR S99 OR S100 OR S101 OR S102 OR S103 OR S104 OR S105 OR S106 OR S107 OR S108 OR S109 OR S110 OR S111 OR S112 OR S113 OR S114
- S152 S57 OR S58 OR S59 OR S60 OR S61 OR S62 OR S63 OR S64 OR S65 OR S66 OR S67 OR S68 OR S69 OR S70 OR S71 OR S72 OR S73 OR S74 OR S75 OR S76 OR S77 OR S78 OR S79 OR S80 OR S81
- S151 S40 OR S41 OR S42 OR S43 OR S44 OR S45 OR S46 OR S47 OR S48 OR S49 OR S50 OR S51 OR S52 OR S53 OR S54 OR S55 OR S56
- S150 TI area based initiative or AB area based initiative

S149 TI single regeneration budget or AB single regeneration budget  
S148 TI ((local or urban or new deal) n5 communit\*) or AB ((local or urban or new deal) n5 communit\*)  
S147 TI ((regenerat\* or redevelop\* or develop\* or renewal or depriv\* or disadvantag\* or affluent or poor) N5 (area or neighbo?rhood or communit\*)) or AB ((regenerat\* or redevelop\* or develop\* or renewal or depriv\* or disadvantag\* or affluent or poor) N5 (area or neighbo?rhood or communit\*))  
S146 (MH "Crowding")  
S145 (MH "Housing+") OR (MH "Public Housing")  
S144 TI social interaction or AB social interaction  
S143 TI social integration or AB social integration  
S142 TI poor housing or AB poor housing  
S141 TI poor environment or AB poor environment  
S140 TI overcrowd\* or AB overcrowd\*  
S139 TI neglect or AB neglect  
S138 TI social housing or AB social housing  
S137 TI owner occupied or AB owner occupied  
S136 TI private renting or AB private renting  
S135 TI housing tenure or AB housing tenure  
S134 TI housing costs or AB housing costs  
S133 TI property own\* or AB property own\*  
S132 TI home own\* or AB home own\*  
S131 TI housing affordability or AB housing affordability  
S130 TI car ownership or AB car ownership  
S129 "Social Stigma"  
S128 (MH "Economic and Social Security")  
S127 (MH "Social Networking+")  
S126 (MH "Social Mobility")  
S125 (MH "Social Isolation+")  
S124 TI social trend\* or AB social trend\*  
S123 TI social stigma or AB social stigma  
S122 TI social status or AB social status  
S121 TI social insurance\* or AB social insurance\*  
S120 TI social security or AB social security  
S119 TI social relationship\* or AB social relationship\*  
S118 TI social position\* or AB social position\*  
S117 TI social network\* or AB social network\*  
S116 TI social mobility or AB social mobility  
S115 TI social isolation or AB social isolation  
S114 (MH "Salaries and Fringe Benefits+")  
S113 (MH "Economic and Social Security")  
S112 (MH "Divorce")  
S111 (MH "Single Parent")  
S110 (MH "Poverty+")  
S109 TI financial problems\* or AB financial problems\*  
S108 TI borrow or AB borrow  
S107 TI loan or AB loan  
S106 TI credit or AB credit  
S105 TI over-indebtedness or AB over-indebtedness  
S104 TI indebtedness or AB indebtedness  
S103 TI debt or AB debt

S102 TI disposable income or AB disposable income  
S101 TI deprivation or AB deprivation  
S100 TI income support or AB income support  
S99 TI tax rebate\* or AB tax rebate\*  
S98 TI poverty trap or AB poverty trap  
S97 TI social welfare\* or AB social welfare\*  
S96 TI welfare benefit or AB welfare benefit  
S95 TI financial hardship or AB financial hardship  
S94 TI minimum salar\* or AB minimum salar\*  
S93 TI tax credit\* or AB tax credit\*  
S92 TI minimum wage or AB minimum wage  
S91 TI standard of living or AB standard of living  
S90 TI social security benefit\* or AB social security benefit\*  
S89 TI ("marital separation" or divorce) or AB ("marital separation" or divorce)  
S88 TI sole parent\* or AB sole parent\*  
S87 TI single parent\* or AB single parent\*  
S86 TI lone parent\* or AB lone parent\*  
S85 TI prosperity or AB prosperity  
S84 TI low pay or AB low pay  
S83 TI low income or AB low income  
S82 TI poverty or AB poverty  
S81 (MH "Public Assistance+")  
S80 (MH "Social Welfare+")  
S79 (MH "Vocational Education")  
S78 (MH "Employment+")  
S77 (MH "Occupations and Professions+")  
S76 (MH "Income+")  
S75 (MH "Unemployment")  
S74 TI welfare or AB welfare  
S73 TI child benefit or AB child benefit  
S72 TI universal credit or AB universal credit  
S71 TI new deal or AB new deal  
S70 TI welfare to work or AB welfare to work  
S69 TI economic activity or AB economic activity  
S68 TI vocational rehabilitation or AB vocational rehabilitation  
S67 TI vocational education\* or AB vocational education\*  
S66 TI vocational train\* or AB vocational train\*  
S65 TI labo?r market polic\* or AB labo?r market polic\*  
S64 TI job opportunit\* or AB job opportunit\*  
S63 TI employ\* or AB employ\*  
S62 TI jobseeker's allowance or AB jobseeker's allowance  
S61 TI occupation\* or AB occupation\*  
S60 TI income or AB income  
S59 TI jobless\* or AB jobless\*  
S58 TI workless\* or AB workless\*  
S57 TI unemploy\* or AB unemploy\*  
S56 (MH "Social Mobility")  
S55 (MH "Educational Status")  
S54 (MH "Literacy")  
S53 (MH "Education+")  
S52 TI widen\* participat\* or AB widen\* participat\*

S51 TI social mobility or AB social mobility  
 S50 TI empower\* or AB empower\*  
 S49 TI low education\* or AB low education\*  
 S48 TI education\* or AB education\*  
 S47 TI educational achievement or AB educational achievement  
 S46 TI educational attainment or AB educational attainment  
 S45 TI educational level\* or AB educational level\*  
 S44 TI university education or AB university education  
 S43 TI adult literacy or AB adult literacy  
 S42 TI life long learn\* or AB life long learn\*  
 S41 TI lifelong learn\* or AB lifelong learn\*  
 S40 TI adult educat\* or AB adult educat\*  
 S39 S18 AND S38  
 S38 S19 OR S20 OR S21 OR S22 OR S23 OR S24 OR S25 OR S26 OR S27 OR S28 OR S29 OR S30 OR  
 S31 OR S32 OR S33 OR S34 OR S35 OR S36 OR S37  
 S37 (MH "Socioeconomic Factors+")  
 S36 TI social gradient\* or AB social gradient\*  
 S35 TI social inclusion or AB social inclusion  
 S34 TI social exclusion or AB social exclusion  
 S33 TI social disparit\* or AB social disparit\*  
 S32 TI social disadvantage or AB social disadvantage  
 S31 TI social capital or AB social capital  
 S30 TI social factors or AB social factors  
 S29 TI social class\* or AB social class\*  
 S28 TI social adversity or AB social adversity  
 S27 TI (sociodemographic or "socio demographic") or AB (sociodemographic or "socio  
 demographic")  
 S26 TI ses or AB ses  
 S25 TI (socioeconomic or "socio economic") or AB (socioeconomic or "socio economic")  
 S24 TI depriv\* or AB depriv\*  
 S23 TI disadvantage\* or AB disadvantage\*  
 S22 TI unequal or AB unequal  
 S21 TI (disparity or disparities) or AB (disparity or disparities)  
 S20 TI (inequality or inequalities or inequity) or AB (inequality or inequalities or inequity)  
 S19 TI (equality or equalities or equity) or AB (equality or equalities or equity)  
 S18 S1 OR S2 OR S3 OR S4 OR S5 OR S6 OR S7 OR S8 OR S9 OR S10 OR S11 OR S12 OR S13 OR S14  
 OR S15 OR S16 OR S17  
 S17 TI gestation\* or AB gestation\*  
 S16 TI (preterm or "pre term") or AB (preterm or "pre term")  
 S15 TI (birth\* or childbirth) or AB (birth\* or childbirth)  
 S14 TI matern\* or AB matern\*  
 S13 TI (matern\* or mother\* or baby or babies or f?etal or f?etus or neonat\* or newborn or "new  
 born") or AB (matern\* or mother\* or baby or babies or f?etal or f?etus or neonat\* or newborn or  
 "new born")  
 S12 TI (prenatal or "pre natal" or antenatal or "ante natal" or antepartum or "ante partum" or  
 postnatal or "post natal" or postpartum or "post partum" or perinatal or "peri natal" or peripartum  
 or "peri partum") or AB (prenatal or "pre natal" or antenatal or "ante natal" or antepartum or "ante  
 partum" or postnatal or "post natal" or postpartum or "post partum" or perinatal or "peri natal" or  
 peripartum or "peri partum")  
 S11 TI pregnan\* or AB pregnan\*  
 S10 (MH "Fetus+")

- S9 (MH "Infant, Newborn+")
- S8 (MH "Parity")
- S7 TI Gravidity or AB Gravidity
- S6 (MH "Pregnancy Outcomes")
- S5 (MH "Labor+")
- S4 (MH "Pregnancy Trimesters+")
- S3 (MH "Expectant Mothers")
- S2 (MH "Pregnancy Complications+")
- S1 (MH "Pregnancy+")

### **Embase**

1. exp pregnancy/
2. exp pregnancy complication/
3. exp pregnant woman/
4. exp birth/
5. exp pregnancy outcome/
6. gravidity.ti,ab,kw.
7. exp parity/
8. exp newborn/
9. exp fetus/
10. pregnan\*.ti,ab,kw.
11. (prenatal or "pre natal" or antenatal or "ante natal" or antepartum or "ante partum" or postnatal or "post natal" or postpartum or "post partum" or perinatal or "peri natal" or peripartum or "peri partum").ti,ab,kw.
12. (matern\* or mother\* or baby or babies or f?etal or f?etus or neonat\* or newborn or "new born").ti,ab,kw.
13. matern\*.ti,ab,kw.
14. (birth\* or childbirth).ti,ab,kw.
15. (preterm or "pre term").ti,ab,kw.
16. gestation\*.ti,ab,kw.
17. or/1-16
18. (equality or equalities or equity).ti,ab,kw.
19. (inequality or inequalities or inequity).ti,ab,kw.
20. (disparity or disparities).ti,ab,kw.
21. unequal.ti,ab,kw.
22. disadvantage\*.ti,ab,kw.
23. depriv\*.ti,ab,kw.
24. (socioeconomic or "socio economic").ti,ab,kw. or exp socioeconomics/
25. ses.ti,ab,kw.
26. (sociodemographic or "socio demographic").ti,ab,kw.
27. "social adversity".ti,ab,kw.
28. "social class\*".ti,ab,kw. or exp social class/
29. "social factors".ti,ab,kw.
30. "social capital".ti,ab,kw.
31. "social disadvantage".ti,ab,kw.
32. "social disparit\*".ti,ab,kw.
33. "social exclusion".ti,ab,kw.
34. "social inclusion".ti,ab,kw.
35. "social gradient\*".ti,ab,kw.

36. or/18-35
37. "adult educat\*".ti,ab,kw.
38. "lifelong learn\*".ti,ab,kw.
39. "life long learn\*".ti,ab,kw.
40. "adult literacy".ti,ab,kw.
41. "university education".ti,ab,kw.
42. "educational level\*".ti,ab,kw.
43. "educational attainment".ti,ab,kw.
44. "educational achievement".ti,ab,kw.
45. education\*.ti,ab,kw.
46. "low education\*".ti,ab,kw.
47. empower\*.ti,ab,kw.
48. "social mobility".ti,ab,kw.
49. "widen\* participat\*".ti,ab,kw.
50. exp education/
51. exp literacy/
52. exp educational status/
53. or/37-52
54. unemploy\*.ti,ab,kw.
55. workless\*.ti,ab,kw.
56. jobless\*.ti,ab,kw.
57. income.ti,ab,kw.
58. occupation\*.ti,ab,kw.
59. "jobseeker's allowance".ti,ab,kw.
60. employ\*.ti,ab,kw.
61. "job opportunit\*".ti,ab,kw.
62. "labo?r market polic\*".ti,ab,kw.
63. "vocational train\*".ti,ab,kw.
64. "vocational education\*".ti,ab,kw.
65. "vocational rehabilitation".ti,ab,kw.
66. "economic activity".ti,ab,kw.
67. "welfare to work".ti,ab,kw.
68. "new deal".ti,ab,kw.
69. "universal credit".ti,ab,kw.
70. "child benefit".ti,ab,kw.
71. welfare.ti,ab,kw.
72. exp unemployment/
73. exp income/
74. exp occupation/
75. exp employment/
76. exp vocational education/
77. exp social welfare/
78. or/54-77
79. poverty.ti,ab,kw.
80. "low income".ti,ab,kw.
81. "low pay".ti,ab,kw.
82. prosperity.ti,ab,kw.
83. "lone parent\*".ti,ab,kw.
84. "single parent\*".ti,ab,kw.
85. "sole parent\*".ti,ab,kw.
86. ("marital separation" or divorce).ti,ab,kw.

87. "social security benefit\*".ti,ab,kw.
88. "standard of living".ti,ab,kw.
89. "minimum wage".ti,ab,kw.
90. "tax credit\*".ti,ab,kw.
91. "minimum salar\*".ti,ab,kw.
92. "financial hardship".ti,ab,kw.
93. "welfare benefit".ti,ab,kw.
94. "social welfare\*".ti,ab,kw.
95. "poverty trap".ti,ab,kw.
96. "tax rebate\*".ti,ab,kw.
97. "income support".ti,ab,kw.
98. deprivation.ti,ab,kw.
99. "disposable income".ti,ab,kw.
100. debt.ti,ab,kw.
101. indebtedness.ti,ab,kw.
102. over-indebtedness.ti,ab,kw.
103. credit.ti,ab,kw.
104. loan.ti,ab,kw.
105. borrow.ti,ab,kw.
106. "financial problems\*".ti,ab,kw.
107. exp poverty/
108. exp single parent/
109. exp divorce/
110. exp social security/
111. exp "salary and fringe benefit"/
112. or/79-111
113. "social isolation".ti,ab,kw.
114. "social mobility".ti,ab,kw.
115. "social network\*".ti,ab,kw.
116. "social position\*".ti,ab,kw.
117. "social relationship\*".ti,ab,kw.
118. "social security".ti,ab,kw.
119. "social insurance\*".ti,ab,kw.
120. "social status".ti,ab,kw.
121. "social stigma".ti,ab,kw.
122. "social trend\*".ti,ab,kw.
123. exp social isolation/
124. exp social class/
125. exp social network/
126. exp social security/
127. exp social stigma/
128. or/113-127
129. "car ownership".ti,ab,kw.
130. "housing affordability".ti,ab,kw.
131. "home own\*".ti,ab,kw.
132. "property own\*".ti,ab,kw.
133. "housing costs".ti,ab,kw.
134. "housing tenure".ti,ab,kw.
135. "private renting".ti,ab,kw.
136. "owner occupied".ti,ab,kw.
137. "social housing".ti,ab,kw.

138. neglect.ti,ab,kw.
139. overcrowd\*.ti,ab,kw.
140. "poor environment".ti,ab,kw.
141. "poor housing".ti,ab,kw.
142. "social integration".ti,ab,kw.
143. "social interaction".ti,ab,kw.
144. exp housing/
145. or/129-144
146. ((regenerat\* or redevelop\* or develop\* or renewal or depriv\* or disadvantag\* or affluent or poor) adj5 (area or neighbo?rhood or communit\*)).ti,ab,kw.
147. ((local or urban or new deal) adj5 communit\*).ti,ab,kw.
148. "single regeneration budget".ti,ab,kw.
149. "area based initiative".ti,ab,kw.
150. or/146-149
151. 53 or 78 or 112 or 128 or 145 or 150
152. 17 and 36 and 151
153. epidemiolog\*.ti,ab,kw. or exp epidemiology/
154. exp case control study/
155. exp control group/
156. exp statistical analysis/
157. (Case adj3 (control or series or report\* or stud\* or comparison)).ti,ab,kw.
158. cohort studies.ti,ab,kw. or exp cohort analysis/
159. exp longitudinal study/
160. longitudinal.ti,ab,kw.
161. (Follow up adj (study or studies)).ti,ab,kw.
162. exp prospective study/
163. prospective.ti,ab,kw.
164. exp retrospective study/
165. retrospective.ti,ab,kw.
166. (associat\* adj3 (with or between)).ti,ab,kw.
167. prevalence.ti,ab,kw.
168. exp prevalence/
169. transversal.ti,ab,kw.
170. exp incidence/
171. incidence.ti,ab,kw.
172. exp observational study/
173. (observational adj (study or studies)).ti,ab,kw.
174. exp cross-sectional study/
175. cross sectional.ti,ab,kw.
176. "logistic model\*".ti,ab,kw.
177. or/153-176
178. 152 and 177
179. exp randomized controlled trial/
180. exp "systematic review"/
181. exp meta analysis/
182. exp clinical trial/
183. (trial\* or qualitative).ti.
184. exp qualitative research/
185. (abstract or abstract report or book or business or business article or chapter or conference or conference abstract or conference paper or "conference review" or data or data paper or editorial or erratum or in or letter or note or patent or press or report or "review" or short or tombstone).pt

186. (Randomized Controlled Trial or Controlled Clinical Trial or Pragmatic Clinical Trial or Equivalence Trial or Clinical Trial, Phase III).pt.
187. Randomized Controlled Trial/
188. exp Randomized Controlled Trials as Topic/
189. "Randomized Controlled Trial (topic)"/
190. Controlled Clinical Trial/
191. exp Controlled Clinical Trials as Topic/
192. "Controlled Clinical Trial (topic)"/
193. Randomization/
194. Random Allocation/
195. Double-Blind Method/
196. Double Blind Procedure/
197. Double-Blind Studies/
198. Single-Blind Method/
199. Single Blind Procedure/
200. Single-Blind Studies/
201. Placebos/
202. Placebo/
203. Control Groups/
204. Control Group/
205. (random\* or sham or placebo\*).ti,ab,hw,kw.
206. ((singl\* or doubl\*) adj (blind\* or dumm\* or mask\*)).ti,ab,hw,kw.
207. ((tripl\* or trebl\*) adj (blind\* or dumm\* or mask\*)).ti,ab,hw,kw.
208. (control\* adj3 (study or studies or trial\* or group\*)).ti,ab,kw.
209. (Nonrandom\* or non random\* or non-random\* or quasi-random\* or quasirandom\*).ti,ab,hw,kw.
210. allocated.ti,ab,hw.
211. ((open label or open-label) adj5 (study or studies or trial\*)).ti,ab,hw,kw.
212. ((equivalence or superiority or non-inferiority or noninferiority) adj3 (study or studies or trial\*)).ti,ab,hw,kw.
213. (pragmatic study or pragmatic studies).ti,ab,hw,kw.
214. ((pragmatic or practical) adj3 trial\*).ti,ab,hw,kw.
215. ((quasiexperimental or quasi-experimental) adj3 (study or studies or trial\*)).ti,ab,hw,kw.
216. (phase adj3 (III or "3") adj3 (study or studies or trial\*)).ti,hw,kw.
217. or/186-216
218. meta-analysis.pt.
219. meta-analysis/ or systematic review/ or meta-analysis as topic/ or "meta analysis (topic)"/ or "systematic review (topic)"/ or exp technology assessment, biomedical/
220. ((systematic\* adj3 (review\* or overview\*)) or (methodologic\* adj3 (review\* or overview\*))).ti,ab,kw.
221. ((quantitative adj3 (review\* or overview\* or synthes\*)) or (research adj3 (integrati\* or overview\*))).ti,ab,kw.
222. ((integrative adj3 (review\* or overview\*)) or (collaborative adj3 (review\* or overview\*)) or (pool\* adj3 analy\*)).ti,ab,kw.
223. (data synthes\* or data extraction\* or data abstraction\*).ti,ab,kw.
224. (handsearch\* or hand search\*).ti,ab,kw.
225. (mantel haenszel or peto or der simonian or dersimonian or fixed effect\* or latin square\*).ti,ab,kw.
226. (met analy\* or metanaly\* or technology assessment\* or HTA or HTAs or technology overview\* or technology appraisal\*).ti,ab,kw.
227. (meta regression\* or metaregression\*).ti,ab,kw.

228. (meta-analy\* or metaanaly\* or systematic review\* or biomedical technology assessment\* or bio-medical technology assessment\*).mp,hw.
229. (medline or cochrane or pubmed or medlars or embase or cinahl).ti,ab,hw.
230. (cochrane or (health adj2 technology assessment) or evidence report).jw.
231. (comparative adj3 (efficacy or effectiveness)).ti,ab,kw.
232. (outcomes research or relative effectiveness).ti,ab,kw.
233. ((indirect or indirect treatment or mixed-treatment) adj comparison\*).ti,ab,kw.
234. or/218-233
235. 179 or 180 or 181 or 182 or 183 or 184 or 185 or 217 or 234
236. 178 not 235
237. limit 236 to (human and yr="1999 -Current")

### **Medline**

1. exp Pregnancy/
2. exp Pregnancy Complications/
3. exp Pregnant Women/
4. exp Pregnancy Trimesters/
5. exp Parturition/
6. exp Pregnancy Outcome/
7. exp Gravidity/
8. exp Parity/
9. exp Infant, Newborn/
10. exp Fetus/
11. pregnan\*.ti,ab,kw.
12. (prenatal or "pre natal" or antenatal or "ante natal" or antepartum or "ante partum" or postnatal or "post natal" or postpartum or "post partum" or perinatal or "peri natal" or peripartum or "peri partum").ti,ab,kw.
13. (matern\* or mother\* or baby or babies or f?etal or f?etus or neonat\* or newborn or "new born").ti,ab,kw.
14. matern\*.ti,ab,kw.
15. (birth\* or childbirth).ti,ab,kw.
16. (preterm or "pre term").ti,ab,kw.
17. gestation\*.ti,ab,kw.
18. or/1-17
19. (equality or equalities or equity).ti,ab,kw.
20. (inequality or inequalities or inequity).ti,ab,kw.
21. (disparity or disparities).ti,ab,kw.
22. unequal.ti,ab,kw.
23. disadvantage\*.ti,ab,kw.
24. depriv\*.ti,ab,kw.
25. (socioeconomic or "socio economic").ti,ab,kw. or exp Socioeconomic Factors/
26. ses.ti,ab,kw.
27. (sociodemographic or "socio demographic").ti,ab,kw.
28. "social adversity".ti,ab,kw.
29. "social class\*".ti,ab,kw.
30. "social factors".ti,ab,kw.
31. "social capital".ti,ab,kw.
32. "social disadvantage".ti,ab,kw.
33. "social disparit\*".ti,ab,kw.
34. "social exclusion".ti,ab,kw.

35. "social inclusion".ti,ab,kw.
36. "social gradient\*".ti,ab,kw.
37. or/19-36
38. "adult educat\*".ti,ab,kw.
39. "lifelong learn\*".ti,ab,kw.
40. "life long learn\*".ti,ab,kw.
41. "adult literacy".ti,ab,kw.
42. "university education".ti,ab,kw.
43. "educational level\*".ti,ab,kw.
44. "educational attainment".ti,ab,kw.
45. "educational achievement".ti,ab,kw.
46. education\*.ti,ab,kw.
47. "low education\*".ti,ab,kw.
48. empower\*.ti,ab,kw.
49. "social mobility".ti,ab,kw.
50. "widen\* participat\*".ti,ab,kw.
51. exp Education/
52. exp Literacy/
53. exp Educational Status/
54. exp Social Mobility/
55. or/38-54
56. unemploy\*.ti,ab,kw.
57. workless\*.ti,ab,kw.
58. jobless\*.ti,ab,kw.
59. income.ti,ab,kw.
60. occupation\*.ti,ab,kw.
61. "jobseeker's allowance".ti,ab,kw.
62. employ\*.ti,ab,kw.
63. "job opportunit\*".ti,ab,kw.
64. "labo?r market polic\*".ti,ab,kw.
65. "vocational train\*".ti,ab,kw.
66. "vocational education\*".ti,ab,kw.
67. "vocational rehabilitation".ti,ab,kw.
68. "economic activity".ti,ab,kw.
69. "welfare to work".ti,ab,kw.
70. "new deal".ti,ab,kw.
71. "universal credit".ti,ab,kw.
72. "child benefit".ti,ab,kw.
73. welfare.ti,ab,kw.
74. exp Unemployment/
75. exp Income/
76. exp Occupations/
77. exp Employment/
78. exp Vocational Education/
79. exp Social Welfare/
80. exp Public Assistance/
81. or/56-80
82. poverty.ti,ab,kw.
83. "low income".ti,ab,kw.
84. "low pay".ti,ab,kw.
85. prosperity.ti,ab,kw.

86. "lone parent\*".ti,ab,kw.
87. "single parent\*".ti,ab,kw.
88. "sole parent\*".ti,ab,kw.
89. ("marital separation" or divorce).ti,ab,kw.
90. "social security benefit\*".ti,ab,kw.
91. "standard of living".ti,ab,kw.
92. "minimum wage".ti,ab,kw.
93. "tax credit\*".ti,ab,kw.
94. "minimum salar\*".ti,ab,kw.
95. "financial hardship".ti,ab,kw.
96. "welfare benefit".ti,ab,kw.
97. "social welfare\*".ti,ab,kw.
98. "poverty trap".ti,ab,kw.
99. "tax rebate\*".ti,ab,kw.
100. "income support".ti,ab,kw.
101. deprivation.ti,ab,kw.
102. "disposable income".ti,ab,kw.
103. debt.ti,ab,kw.
104. indebtedness.ti,ab,kw.
105. over-indebtedness.ti,ab,kw.
106. credit.ti,ab,kw.
107. loan.ti,ab,kw.
108. borrow.ti,ab,kw.
109. "financial problems\*".ti,ab,kw.
110. exp Poverty/
111. exp Single Parent/
112. exp Divorce/
113. exp Social Security/
114. exp "Salaries and Fringe Benefits"/
115. or/82-114
116. "social isolation".ti,ab,kw.
117. "social mobility".ti,ab,kw.
118. "social network\*".ti,ab,kw.
119. "social position\*".ti,ab,kw.
120. "social relationship\*".ti,ab,kw.
121. "social security".ti,ab,kw.
122. "social insurance\*".ti,ab,kw.
123. "social status".ti,ab,kw.
124. "social stigma".ti,ab,kw.
125. "social trend\*".ti,ab,kw.
126. exp Social Isolation/
127. exp Social Mobility/
128. exp Social Networking/
129. exp Social Security/
130. exp Social Stigma/
131. or/116-130
132. "car ownership".ti,ab,kw.
133. "housing affordability".ti,ab,kw.
134. "home own\*".ti,ab,kw.
135. "property own\*".ti,ab,kw.
136. "housing costs".ti,ab,kw.

137. "housing tenure".ti,ab,kw.
138. "private renting".ti,ab,kw.
139. "owner occupied".ti,ab,kw.
140. "social housing".ti,ab,kw.
141. neglect.ti,ab,kw.
142. overcrowd\*.ti,ab,kw.
143. "poor environment".ti,ab,kw.
144. "poor housing".ti,ab,kw.
145. "social integration".ti,ab,kw.
146. "social interaction".ti,ab,kw.
147. Housing/ or exp Public Housing/
148. exp Crowding/
149. or/132-148
150. ((regenerat\* or redevelop\* or develop\* or renewal or depriv\* or disadvantag\* or affluent or poor) adj5 (area or neighbo?rhood or communit\*)).ti,ab,kw.
151. ((local or urban or new deal) adj5 communit\*).ti,ab,kw.
152. "single regeneration budget".ti,ab,kw.
153. "area based initiative".ti,ab,kw.
154. or/150-153
155. 55 or 81 or 115 or 131 or 149 or 154
156. 18 and 37 and 155
157. Epidemiologic studies/ or exp Epidemiologic Methods/ or epidemiolog\*.ti,ab,kw.
158. exp case control studies/ or exp Control Groups/ or exp Matched-Pair Analysis/ or (Case adj3 (control or series or report\* or stud\* or comparison)).ti,ab,kw. or case reports.pt.
159. exp cohort studies/ or Cohort\*.ti,ab,kw.
160. exp Longitudinal Studies/ or Longitudinal.ti,ab,kw.
161. exp Follow-Up Studies/ or (Follow up adj (study or studies)).ti,ab,kw.
162. exp Prospective Studies/ or prospective.ti,ab,kw.
163. exp Retrospective Studies/ or Retrospective.ti,ab,kw.
164. (associat\* adj3 (with or between)).ti,ab,kw.
165. exp Prevalence/ or prevalence.ti,ab,kw. or transversal.ti,ab,kw.
166. exp Incidence/ or incidence.ti,ab,kw.
167. exp Observational Study/ or (observational adj (study or studies)).ti,ab,kw. or exp Cross-Sectional Studies/ or cross sectional.ti,ab,kw.
168. exp Logistic Models/ or "logistic model\*".ti,ab,kw.
169. or/157-168
170. 156 and 169
171. exp Randomized Controlled Trial/
172. exp "Systematic Review"/
173. exp Meta-Analysis/
174. exp Clinical Trial/
175. (trial or qualitative).ti.
176. exp Qualitative Research/
177. 171 or 172 or 173 or 174 or 175 or 176
178. (adaptive clinical trial or address or autobiography or bibliography or biography or case reports or classical article or clinical conference or clinical trial or clinical trial phase i or clinical trial phase ii or clinical trial phase iii or clinical trial phase iv or clinical trial protocol or clinical trial veterinary or collected works or comment or comparative study or congress or congresses or consensus development conference or consensus development conference nih or controlled clinical trial or "corrected and republished article" or dataset or dictionary or directory or duplicate publication or editorial or equivalence trial or evaluation studies or "expression of concern" or festschrift or

government document or guideline or historical article or interactive tutorial or interview or introductory journal article or lecture or legal case or legislation or letter or meta analysis or news or newspaper article or observational study veterinary or overall or patient education handout or periodical index or personal narrative or portrait or practice guideline or pragmatic clinical trial or published erratum or randomized controlled trial or "research support american recovery and reinvestment act" or research support nih extramural or research support nih intramural or research support us govt phs or retracted publication or "retraction of publication" or "review" or "scientific integrity review" or "systematic review" or technical report or twin study or validation studies or video audio media or webcasts).pt.

179. (Randomized Controlled Trial or Controlled Clinical Trial or Pragmatic Clinical Trial or Equivalence Trial or Clinical Trial, Phase III).pt.

180. Randomized Controlled Trial/

181. exp Randomized Controlled Trials as Topic/

182. "Randomized Controlled Trial (topic)"/

183. Controlled Clinical Trial/

184. exp Controlled Clinical Trials as Topic/

185. "Controlled Clinical Trial (topic)"/

186. Randomization/

187. Random Allocation/

188. Double-Blind Method/

189. Double Blind Procedure/

190. Double-Blind Studies/

191. Single-Blind Method/

192. Single Blind Procedure/

193. Single-Blind Studies/

194. Placebos/

195. Placebo/

196. Control Groups/

197. Control Group/

198. (random\* or sham or placebo\*).ti,ab,hw,kw.

199. ((singl\* or doubl\*) adj (blind\* or dumm\* or mask\*)).ti,ab,hw,kw.

200. ((tripl\* or trebl\*) adj (blind\* or dumm\* or mask\*)).ti,ab,hw,kw.

201. (control\* adj3 (study or studies or trial\* or group\*)).ti,ab,kw.

202. (Nonrandom\* or non random\* or non-random\* or quasi-random\* or quasirandom\*).ti,ab,hw,kw.

203. allocated.ti,ab,hw.

204. ((open label or open-label) adj5 (study or studies or trial\*)).ti,ab,hw,kw.

205. ((equivalence or superiority or non-inferiority or noninferiority) adj3 (study or studies or trial\*)).ti,ab,hw,kw.

206. (pragmatic study or pragmatic studies).ti,ab,hw,kw.

207. ((pragmatic or practical) adj3 trial\*).ti,ab,hw,kw.

208. ((quasiexperimental or quasi-experimental) adj3 (study or studies or trial\*)).ti,ab,hw,kw.

209. (phase adj3 (III or "3") adj3 (study or studies or trial\*)).ti,hw,kw.

210. or/179-209

211. meta-analysis.pt.

212. meta-analysis/ or systematic review/ or meta-analysis as topic/ or "meta analysis (topic)"/ or "systematic review (topic)"/ or exp technology assessment, biomedical/

213. ((systematic\* adj3 (review\* or overview\*)) or (methodologic\* adj3 (review\* or overview\*))).ti,ab,kw.

214. ((quantitative adj3 (review\* or overview\* or synthes\*)) or (research adj3 (integrati\* or overview\*))).ti,ab,kw.

215. ((integrative adj3 (review\* or overview\*)) or (collaborative adj3 (review\* or overview\*)) or (pool\* adj3 analy\*)).ti,ab,kw.
216. (data syntheses\* or data extraction\* or data abstraction\*).ti,ab,kw.
217. (handsearch\* or hand search\*).ti,ab,kw.
218. (mantel haenszel or peto or der simonian or dersimonian or fixed effect\* or latin square\*).ti,ab,kw.
219. (met analy\* or metanaly\* or technology assessment\* or HTA or HTAs or technology overview\* or technology appraisal\*).ti,ab,kw.
220. (meta regression\* or metaregression\*).ti,ab,kw.
221. (meta-analy\* or metaanaly\* or systematic review\* or biomedical technology assessment\* or bio-medical technology assessment\*).mp,hw.
222. (medline or cochrane or pubmed or medlars or embase or cinahl).ti,ab,hw.
223. (cochrane or (health adj2 technology assessment) or evidence report).jw.
224. (comparative adj3 (efficacy or effectiveness)).ti,ab,kw.
225. (outcomes research or relative effectiveness).ti,ab,kw.
226. ((indirect or indirect treatment or mixed-treatment) adj comparison\*).ti,ab,kw.
227. or/211-226
228. 178 or 210 or 227
229. 170 not 228
230. limit 229 to (humans and yr="1999 -Current")

### **PsycInfo**

1. exp Pregnancy/
2. exp Birth/
3. Gravidity.ti,ab.
4. Parity.ti,ab.
5. exp Fetus/
6. pregnan\*.ti,ab.
7. (prenatal or "pre natal" or antenatal or "ante natal" or antepartum or "ante partum" or postnatal or "post natal" or postpartum or "post partum" or perinatal or "peri natal" or peripartum or "peri partum").ti,ab.
8. (matern\* or mother\* or baby or babies or f?etal or f?etus or neonat\* or newborn or "new born").ti,ab.
9. (birth\* or childbirth).ti,ab.
10. (preterm or "pre term").ti,ab.
11. gestation\*.ti,ab.
12. or/1-11
13. (equality or equalities or equity).ti,ab.
14. (inequality or inequalities or inequity).ti,ab.
15. (disparity or disparities).ti,ab.
16. unequal.ti,ab.
17. disadvantage\*.ti,ab.
18. (socioeconomic or "socio economic").ti,ab.
19. exp Socioeconomic Status/ or ses.ti,ab.
20. (sociodemographic or "socio demographic").ti,ab.
21. exp Childhood Adversity/ or exp Adversity/ or "social adversity".ti,ab.
22. exp Social Class/ or "social class".ti,ab.
23. exp Social Influences/ or "social factors".ti,ab.
24. exp Social Capital/ or "social capital".ti,ab.
25. exp Disadvantaged/ or "social disadvantage".ti,ab.

26. exp Social Isolation/ or "social exclusion".ti,ab.
27. exp Social Integration/ or exp Social Acceptance/ or "social inclusion".ti,ab.
28. "social gradient".ti,ab.
29. or/13-28
30. "lifelong learn\*".ti,ab.
31. "life long learn\*".ti,ab.
32. exp Adult Education/ or exp Literacy/ or "adult literacy".ti,ab.
33. exp College Students/ or exp Higher Education/ or exp Undergraduate Education/ or "university education".ti,ab.
34. exp Educational Attainment Level/ or "educational attainment".ti,ab.
35. exp Academic Achievement/ or "educational achievement".ti,ab.
36. education\*.ti,ab. or exp Education/
37. exp Empowerment/ or empower\*.ti,ab.
38. "social mobility".ti,ab. or exp Social Mobility/
39. exp Education/
40. or/30-39
41. unemploy\*.ti,ab.
42. workless\*.ti,ab.
43. jobless\*.ti,ab.
44. income.ti,ab.
45. occupation\*.ti,ab.
46. "jobseeker's allowance".ti,ab.
47. employ\*.ti,ab.
48. "vocational train\*".ti,ab.
49. "vocational education\*".ti,ab.
50. "vocational rehabilitation".ti,ab. or exp Vocational Rehabilitation/
51. "economic activity".ti,ab.
52. "welfare to work".ti,ab.
53. "new deal".ti,ab.
54. "universal credit".ti,ab.
55. "child benefit".ti,ab.
56. welfare.ti,ab.
57. exp Unemployment/
58. exp Income Level/ or "Income (Economic)"/ or exp Lower Income Level/
59. exp Occupations/
60. exp Employment Status/
61. exp Vocational Education/
62. or/41-61
63. poverty.ti,ab.
64. "low income".ti,ab.
65. "low pay".ti,ab.
66. prosperity.ti,ab.
67. "lone parent\*".ti,ab.
68. "single parent\*".ti,ab.
69. "sole parent\*".ti,ab.
70. ("marital separation" or divorce).ti,ab.
71. "social security benefit\*".ti,ab.
72. "standard of living".ti,ab.
73. "minimum wage".ti,ab.
74. ("tax credit\*" or "tax rebate").ti,ab.
75. exp Financial Strain/ or "financial hardship".ti,ab.

76. ("welfare benefit\*" or "social welfare" or "poverty trap" or "income support" or deprivation or "disposable income" or debt or indebtedness or credit or "over-indebtedness" or loan\* or borrow\* or "financial problem\*").ti,ab.
77. exp Poverty/
78. exp Divorce/
79. exp Social Security/
80. exp Salaries/
81. or/63-80
82. (social\* adj (isolate\* or mobility or network\* or position\* or relationship\* or security or insurance or status or stigma or trend\*)).ti,ab.
83. exp Social Status/
84. exp Social Isolation/
85. exp Social Mobility/
86. exp Social Security/
87. exp Stigma/
88. or/82-87
89. ("car own\*" or "housing affordability" or "home own\*" or "property own\*" or "housing cost\*" or "housing tenure" or "private renting" or "owner occupied" or "social housing" or neglect\* or "poor environment" or "poor housing" or "social integration" or "social interaction" or housing or crowding).ti,ab.
90. exp Social Integration/
91. exp Social Interaction/
92. exp Housing/
93. exp Crowding/
94. or/89-93
95. ((regenerat\* or redevelop\* or develop\* or renewal or depriv\* or disadvantag\* or affluent or poor) adj5 (area or neighbo?rhood or communit\*)).ti,ab.
96. ((local or urban or new deal) adj5 communit\*).ti,ab.
97. "single regeneration budget".ti,ab.
98. "area based initiative".ti,ab.
99. or/95-98
100. 40 or 62 or 81 or 88 or 94 or 99
101. exp Epidemiology/ or Epidemiolog\*.ti,ab.
102. exp Experimental Controls/ or (Case adj3 (control or series or report\* or stud\* or comparison)).ti,ab.
103. cohort\*.ti,ab.
104. Longitudinal.ti,ab. or exp Longitudinal Studies/
105. FollowUp Studies/ or (Follow up adj (study or studies)).ti,ab.
106. Prospective.ti,ab. or exp Prospective Studies/
107. Retrospective.ti,ab. or exp Retrospective Studies/
108. (associat\* adj3 (with or between)).ti,ab.
109. (prevalence or transversal or incidence).ti,ab.
110. (observational adj (study or studies)).ti,ab.
111. "cross sectional".ti,ab.
112. "logistic model\*".ti,ab.
113. or/101-112
114. 12 and 29 and 100
115. 113 and 114
116. (Randomized Controlled Trial or Controlled Clinical Trial or Pragmatic Clinical Trial or Equivalence Trial or Clinical Trial, Phase III).pt.
117. Randomized Controlled Trial/

118. exp Randomized Controlled Trials as Topic/
119. "Randomized Controlled Trial (topic)"/
120. Controlled Clinical Trial/
121. exp Controlled Clinical Trials as Topic/
122. "Controlled Clinical Trial (topic)"/
123. Randomization/
124. Random Allocation/
125. Double-Blind Method/
126. Double Blind Procedure/
127. Double-Blind Studies/
128. Single-Blind Method/
129. Single Blind Procedure/
130. Single-Blind Studies/
131. Placebos/
132. Placebo/
133. Control Groups/
134. Control Group/
135. (random\* or sham or placebo\*).ti,ab,hw,kw.
136. ((singl\* or doubl\*) adj (blind\* or dumm\* or mask\*)).ti,ab,hw,kw.
137. ((tripl\* or trebl\*) adj (blind\* or dumm\* or mask\*)).ti,ab,hw,kw.
138. (control\* adj3 (study or studies or trial\* or group\*)).ti,ab,kw.
139. (Nonrandom\* or non random\* or non-random\* or quasi-random\* or quasirandom\*).ti,ab,hw,kw.
140. allocated.ti,ab,hw.
141. ((open label or open-label) adj5 (study or studies or trial\*)).ti,ab,hw,kw.
142. ((equivalence or superiority or non-inferiority or noninferiority) adj3 (study or studies or trial\*)).ti,ab,hw,kw.
143. (pragmatic study or pragmatic studies).ti,ab,hw,kw.
144. ((pragmatic or practical) adj3 trial\*).ti,ab,hw,kw.
145. ((quasiexperimental or quasi-experimental) adj3 (study or studies or trial\*)).ti,ab,hw,kw.
146. (phase adj3 (III or "3") adj3 (study or studies or trial\*)).ti,hw,kw.
147. or/116-146
148. meta-analysis.pt.
149. meta-analysis/ or systematic review/ or meta-analysis as topic/ or "meta analysis (topic)"/ or "systematic review (topic)"/ or exp technology assessment, biomedical/
150. ((systematic\* adj3 (review\* or overview\*)) or (methodologic\* adj3 (review\* or overview\*))).ti,ab,kw.
151. ((quantitative adj3 (review\* or overview\* or synthes\*)) or (research adj3 (integrati\* or overview\*))).ti,ab,kw.
152. ((integrative adj3 (review\* or overview\*)) or (collaborative adj3 (review\* or overview\*)) or (pool\* adj3 analy\*)).ti,ab,kw.
153. (data synthes\* or data extraction\* or data abstraction\*).ti,ab,kw.
154. (handsearch\* or hand search\*).ti,ab,kw.
155. (mantel haenszel or peto or der simonian or dersimonian or fixed effect\* or latin square\*).ti,ab,kw.
156. (met analy\* or metanaly\* or technology assessment\* or HTA or HTAs or technology overview\* or technology appraisal\*).ti,ab,kw.
157. (meta regression\* or metaregression\*).ti,ab,kw.
158. (meta-analy\* or metaanaly\* or systematic review\* or biomedical technology assessment\* or bio-medical technology assessment\*).mp,hw.
159. (medline or cochrane or pubmed or medlars or embase or cinahl).ti,ab,hw.

160. (cochrane or (health adj2 technology assessment) or evidence report).jw.
161. (comparative adj3 (efficacy or effectiveness)).ti,ab,kw.
162. (outcomes research or relative effectiveness).ti,ab,kw.
163. ((indirect or indirect treatment or mixed-treatment) adj comparison\*).ti,ab,kw.
164. or/148-163
165. 147 or 164
166. 115 not 165

### **Scopus search**

((TITLE-ABS(pregnan\* or parturition or gravidity or parity or fetus or foetus or fetal or foetal or prenatal or {pre natal} or antenatal or {ante natal} or antepartum or {ante partum} or postnatal or {post natal} or postpartum or {post partum} or perinatal or {peri natal} or peripartum or {peri partum} or matern\* or mother\* or baby or babies or neonat\* or newborn\* or {new born} or birth\* or childbirth\* or preterm or {pre term} or gestat\*)) and (TITLE-ABS(equality or equalities or equity or inequality or inequalities or inequity or disparity or disparities or gap\* or gradient\* or unequal or disadvantage\* or depriv\* or variation\* or socioeconomic\* or {socio economic} or ses or sociodemographic or {socio demographic}) or TITLE-ABS(social W/1 (adversity or class or factors or capital or disadvantage or disparit\* or exclusion or inclusion or gradient))) and ((TITLE-ABS(educat\* or {lifelong learning} or {life long learning} or literacy or empower\* or {social mobility} or (widen\* W/1 participat\*))) or (TITLE-ABS(unemploy\* or workless\* or jobless\* or occupation\* {jobseeker's allowance} or employ\* or (job W/1 opportunit\*) or {labour market policy} or (vocational W/1 (train\* or education or rehabilitation)) or {economic activity} or {welfare to work} or {new deal} or {universal credit} or {child benefit} or welfare or income or {social welfare} or {public assistance})) or (TITLE-ABS(poverty or income or pay or prosperity or {lone parent} or {single parent} or {sole parent} or {marital separation} or divorce or {social security} or {standard of living} or {minimum wage} or {tax credit} or salary or {financial hardship} or {welfare benefit} or {social welfare} or {tax rebate} or deprivation or debt or indebtedness or {over-indebtedness} or credit or loan or borrow or {financial problems})) or (TITLE-ABS(social W/1 (isolation or mobility or network\* or position\* or relationship or security or insurance or status or stigma or trend))) or (TITLE-ABS({car ownership} or ((home or property) W/1 owner\*) or (housing W/1 (costs or affordability or tenure)) or {private renting} or {owner occupied} or (social W/1 (housing or integration or interaction)) or neglect\* or overcrowd\* or (poor W/1 (environment or housing)) or {public housing} or crowding)) or ((TITLE-ABS((regenerat\* or redevelop\* or develop\* or renewal or depriv\* or disadvantage\* or affluent or poor) W/5 (area or neighbourhood or neighborhood or communit\*))) or (TITLE-ABS(((local or urban or {new deal}) W/5 communit\*) or {single regeneration budget} or {area based initiative})))))) and (PUBYEAR > 1999)) and (TITLE-ABS(epidemiolog\* or (case W/3 (control or series or report or stud\* or comparison)) or {control group} or cohort\* or longitudinal or (follow-up W/1 (study or studies)) or prospective or retrospective or (associat\* W/3 (with or between)) or prevalence or transversal or incidence or (observational W/1 (study or studies)) or {cross sectional} or {logistic model})) AND NOT INDEX(medline)

### Supplementary appendix S3: Grey literature sources

Grey literature searches comprising key data sources were screened for relevance. These were:

- National Perinatal Epidemiology Unit (including the Policy Research Unit in Maternal Health and Care (PRU-MHC) and SHEER (Social Sciences, Health Economics and Epidemiological Research));
- National Maternity and Perinatal Audit;
- ChiMat (the National Child and Maternal Health Unit);
- Royal College of Midwifery;
- Royal College of Obstetricians and Gynaecologists;
- Royal College of Paediatrics and Child Health;
- Centre for Maternal and Child Enquires (CMACE);
- The Confidential Enquiry into Maternal and Child Health (CEMACH).
- Public health organisations and national statistical record offices (e.g. the Office for National Statistics, National Records of Scotland) were also searched using keywords (e.g. pregnancy/deprivation).

Experts in key organisations in each of the countries were also contacted to identify whether there were additional relevant literature not identified in the electronic database or grey literature searches.

## Supplementary appendix S4: Data extraction components

### Study characteristics (reported in Table 1):

- Citation
- Year published
- Country of study
- Study design
- Study period
- Registry/data source
- Population description
- Total sample size
- Inequality exposure
- Pregnancy outcome
- Aims and objectives (not reported in this manuscript)
- Inclusion and exclusion criteria (not reported in this manuscript)
- Contact details of author (not reported in this manuscript)

### Results (reported in supplementary results tables)

- Pregnancy outcome (definition)
- Sample size for each comparison
- Exposure variable comparison group and exposed group (definitions)
- Result (definition of measure, effect size, measure of variance, adjustments made)

## Supplementary appendix S5: Contact with study authors to request additional information

The following table details contact made with study authors. Contact was sought to obtain additional data not available online, to improve the quality of data extraction, or to increase the number of outcomes from the primary study included in our review (which involved requesting frequency data to recalculate odds ratios). The requests to national statistical organisations proved successful, and pre-2000 data was provided in scanned (or digitised form). However, other data requests querying outcomes or requesting frequency data were generally unsuccessful (only one of the four authors replied).

| Author/ publication                                     | Issue and steps taken to contact author                                                                                                                                                                                                                                                      |
|---------------------------------------------------------|----------------------------------------------------------------------------------------------------------------------------------------------------------------------------------------------------------------------------------------------------------------------------------------------|
| Patel et al. (2005) <sup>1</sup>                        | Paper described a 'work per week (hours/50)' outcome, with no further details provided in the text.<br>KT email R. Patel 28.02.2020. Email bounced back. Contacted 'Avon Longitudinal Study of Parents and Children'. No reply.                                                              |
| Snelgrove et al. (2015) <sup>2</sup>                    | Requested raw frequency data for PTB by education, income and housing tenure as reference categories were for the most deprived groups (e.g. lowest income, unowned/rented housing and below secondary education).<br>KT email J. Snelgrove on 29.11.2019 and again on 11.12.2020. No reply. |
| Niedhammer et al. (2012) <sup>3</sup>                   | Hazard ratios used in paper for education, rented home and crowded home. Requested frequencies to calculate own odds ratios.<br>KT emailed I. Niedhammer on 15.01.2020. No reply.                                                                                                            |
| Clemens and Dibben (2017) <sup>4</sup>                  | Clarification required regarding odds ratios for preterm birth.<br>MM email C. Dibben on 21.05.2020. C. Dibben replied on 21.05.2020 confirming interpretation of Table 1.                                                                                                                   |
| National Records of Scotland (NRS) <sup>5</sup>         | Contacted National Records Scotland ( <a href="https://www.nrscotland.gov.uk/about-us/contact-us">https://www.nrscotland.gov.uk/about-us/contact-us</a> ) to obtain a bespoke data request.<br>KT received unpublished ad-hoc breakdown of death registration data on 10.01.20.              |
| Office for National Statistics (ONS) <sup>6</sup>       | Requested scanned copies of live births and infant deaths between 1990 and 2000 (which are only available in printed versions).<br>KT received scanned copies of relevant sections of records from the ONS (on 9.12.2019).                                                                   |
| National Perinatal Reporting System (NPRS) <sup>7</sup> | Requested scanned copies of live births and infant deaths pre-1993 (which are not available online).<br>KT received scanned copies of relevant sections of records from the Economic and Social Research Institute (on 19.12.2019).                                                          |

### References:

1. Patel RR, Peters TJ, Murphy DJ. Prenatal risk factors for Caesarean section. Analyses of the ALSPAC cohort of 12 944 women in England. *International Journal of Epidemiology* 2005;34(2):353-67.
2. Snelgrove JW, Murphy KE. Preterm birth and social inequality: assessing the effects of material and psychosocial disadvantage in a UK birth cohort. *Acta Obstetrica et Gynecologica Scandinavica* 2015;94(7):766-75.

3. Niedhammer I, Murrin C, O'Mahony D, et al. Explanations for social inequalities in preterm delivery in the prospective Lifeways cohort in the Republic of Ireland. *European Journal of Public Health* 2012;22(4):533-38.
4. Clemens T, Dibben C. Living in stressful neighbourhoods during pregnancy: an observational study of crime rates and birth outcomes. *European Journal of Public Health* 2017;27(2):197-202.
5. National Records of Scotland. Numbers of births, stillbirths and neonatal deaths, registered in Scotland in each year from 1990 to 2018 [bespoke request]. Edinburgh: National Records of Scotland, 2019.
6. Office for National Statistics. Mortality Statistics: Childhood, infant and perinatal, England and Wales (1990 - 2007). Newport, Wales, 1990 - 2017.
7. National Perinatal Reporting System. Perinatal Statistics. Dublin, Republic of Ireland, 1990-3, 1999-2016.

## Supplementary appendix S6: Newcastle-Ottawa scale

**Cohort studies****Selection** (note: exposure is individual socio-economic determinants)1) Representativeness of the exposed cohort<sup>a</sup>

- a) truly representative of the average **maternal population<sup>d</sup>** in the community \*
- b) somewhat representative of the average **maternal population<sup>d</sup>** in the community \*
- c) selected group of users e.g. **those with low education level or low income etc.<sup>d</sup>**
- d) no description of the derivation of the cohort

2) Selection of the non-exposed cohort<sup>a</sup>

- a) drawn from the same community as the exposed cohort \*
- b) drawn from a different source
- c) no description of the derivation of the non-exposed cohort

3) Ascertainment of exposure<sup>b</sup>

- a) secure record (e.g. **explicitly measured inequality<sup>d</sup>**) \*
- b) structured interview **e.g. validated self-report<sup>d</sup>**
- c) any self-report
- d) no description

**Comparability**4) Comparability of cohorts on the basis of the design or analysis<sup>c,e</sup>

- a) study controls for **smoking<sup>d</sup>** \*
- b) study controls for any additional factor \*
- c) no adjustments made

**Outcome** (note: outcome is pregnancy health outcomes for mother and baby)5) Assessment of outcome<sup>b</sup>

- a) independent blind assessment \*
- b) record linkage
- c) self-report
- d) no description

6) Was follow-up long enough for outcomes to occur<sup>b</sup>

- a) yes (select an adequate follow up period for outcome of interest: **all women followed up until 28 days after delivery<sup>d</sup>**) \*
- b) no

7) Adequacy of follow up of cohorts<sup>a</sup>

- a) complete follow up - all subjects accounted for \*
- b) subjects lost to follow up unlikely to introduce bias - small number lost – **>80%<sup>d</sup>** follow up, or description provided of those lost) \*
- c) follow up rate **< 80%<sup>d</sup>** and no description of those lost
- d) no statement

Total number of stars (out of a possible 8 stars):

Note: A study can be awarded a maximum of one star for each numbered item within the Selection and Outcome categories. A maximum of two stars can be given for Comparability.

## Footnote:

- a) Questions assessing selection bias
- b) Questions assessing information bias
- c) Questions assessing confounding
- d) Red font indicates where the form was adapted to make questions relevant to this systematic review.
- e) Original question 4 "Demonstration that outcome of interest was not present at start of study" in the original scale is not applicable to this review as the outcomes relate to pregnancy and therefore by nature did not exist at the start of the study. Therefore, this item has been removed from the scale. The denominator value for the maximum number of stars a study can be awarded has been reduced from 9 to 8 due to the removal of the original question 4.

**Case-control studies****Selection** (note: outcome is pregnancy health outcomes for mother and baby)

- 1) Is the case definition adequate<sup>a</sup>
  - a) yes, with independent validation \*
  - b) yes, e.g. record linkage or based on self-reports
  - c) no description
- 2) Representativeness of the cases<sup>a</sup>
  - a) consecutive or obviously representative series of cases \*
  - b) potential for selection biases or not stated.
- 3) Selection of controls<sup>a</sup>
  - a) community controls \*
  - b) hospital controls
  - c) no description
- 4) Definition of controls<sup>a</sup>
  - a) no history of disease (endpoint) \*
  - b) no description of source

**Comparability**

- 5) Comparability of cases and controls on the basis of the design or analysis<sup>c</sup> <sup>,2</sup>
  - a) study controls for **smoking<sup>d</sup>** \*
  - b) study controls for any additional factor\*
  - c) **no adjustments<sup>d</sup>**

**Exposure** (note: exposure is individual socio-economic determinants)

- 6) Assessment of exposure<sup>b</sup>
  - a) secure record \*
  - b) structured interview where blind to case/control status\*
  - c) interview not blinded to case/control status
  - d) written self-report or medical record only
  - e) no description
- 7) Same method of ascertainment for cases and controls<sup>b</sup>
  - a) yes \*
  - b) no
- 8) Non response rate<sup>b</sup>
  - a) same rate for both groups \*
  - b) non respondents described
  - c) rate different and no designation

Total number of stars (out of a possible 9 stars):

Note: A study can be awarded a maximum of one star for each numbered item within the Selection and Outcome categories. A maximum of two stars can be given for Comparability.

## Footnote:

- a) Questions assessing selection bias.
- b) Questions assessing comparability.
- c) Questions assessing confounding.
- d) Red font indicates where the form was adapted to make questions relevant to this systematic review.

**References:**

1. Wells GA, Shea B, O'Connell D, Peterson J, Welch V, Losos M, et al. The Newcastle-Ottawa Scale (NOS) for assessing the quality of nonrandomised studies in meta-analyses 2019 [Available from: [http://www.ohri.ca/programs/clinical\\_epidemiology/oxford.a](http://www.ohri.ca/programs/clinical_epidemiology/oxford.a)

## Supplementary appendix S7: List of excluded articles

No articles were excluded based on language alone. All publications were screened at title/abstract level, regardless of language. Google Translate was used to assess study if title/abstract was not available in English. As the focus of this paper was studies from the UK/ROI, all included studies were in English. If abstracts were screened at title/abstract stage, without full accompanying papers, then contact with study authors would have been sought if the paper looked potentially relevant.

Detailed below are full references for all excluded articles. Articles are excluded for one of the following reasons (in order of hierarchical importance as set out below):

1. The paper focuses on an excluded patient population (n=121)
2. The paper only details data from a restricted population/sub-group (n=180)
3. The paper details a study conducted in an excluded setting (n=279)
4. No deprivation indicators included (n=233)
5. The paper reports aggregate-level measures of deprivation reported only (n=70)
6. No health outcomes of relevance are described (n=434)
7. The paper is not a primary observational study (includes systematic reviews) (n=67)
8. The paper is an exact duplicate (n=4)
9. The paper describes a conference abstract only (n=10)

| Reason for exclusion                                        | References                                                                                                                                                                                                                                                                                                                                                                                                                                                                                                                                                                                                                                                                                                                                                                                                                                                                                                                                                                                                                                                                                                                                                                                                                                                                                                                                                                                                                                                                                                                                                                                                                                                                                                                                                                                                                                                                                                                                                                                                                                                                                                                                                                                                                                                                                                                                                                                                                                                                                                                                                                                                                                                                                                                                                                                                                                                                                                                                                                                                                                                                                                                                                                                                                                                                                                                                                                                                                                                                                                                                                                                                                                                                                                                                                                                                                                                                                                                                                                                                                                                                                                                                                                                                                                                                                                                                                                                      |
|-------------------------------------------------------------|-------------------------------------------------------------------------------------------------------------------------------------------------------------------------------------------------------------------------------------------------------------------------------------------------------------------------------------------------------------------------------------------------------------------------------------------------------------------------------------------------------------------------------------------------------------------------------------------------------------------------------------------------------------------------------------------------------------------------------------------------------------------------------------------------------------------------------------------------------------------------------------------------------------------------------------------------------------------------------------------------------------------------------------------------------------------------------------------------------------------------------------------------------------------------------------------------------------------------------------------------------------------------------------------------------------------------------------------------------------------------------------------------------------------------------------------------------------------------------------------------------------------------------------------------------------------------------------------------------------------------------------------------------------------------------------------------------------------------------------------------------------------------------------------------------------------------------------------------------------------------------------------------------------------------------------------------------------------------------------------------------------------------------------------------------------------------------------------------------------------------------------------------------------------------------------------------------------------------------------------------------------------------------------------------------------------------------------------------------------------------------------------------------------------------------------------------------------------------------------------------------------------------------------------------------------------------------------------------------------------------------------------------------------------------------------------------------------------------------------------------------------------------------------------------------------------------------------------------------------------------------------------------------------------------------------------------------------------------------------------------------------------------------------------------------------------------------------------------------------------------------------------------------------------------------------------------------------------------------------------------------------------------------------------------------------------------------------------------------------------------------------------------------------------------------------------------------------------------------------------------------------------------------------------------------------------------------------------------------------------------------------------------------------------------------------------------------------------------------------------------------------------------------------------------------------------------------------------------------------------------------------------------------------------------------------------------------------------------------------------------------------------------------------------------------------------------------------------------------------------------------------------------------------------------------------------------------------------------------------------------------------------------------------------------------------------------------------------------------------------------------------------------|
| The paper focuses on an excluded patient population (n=121) | <p>Abdollahi, F., Agajani-Delavar, M., Zarghami, M., Lye, M.S., 2016. Postpartum mental health in first-time mothers: A cohort study. <i>Iranian Journal of Psychiatry and Behavioral Sciences</i> 10 (1) (no pagination).</p> <p>Acquavita, S.P., Talks, A., Fiser, K., 2017. Facilitators and Barriers to Cigarette Smoking While Pregnant for Women With Substance Use Disorders. <i>Nicotine &amp; Tobacco Research</i> 19:555-61.</p> <p>Adamek, R., Florek, E., Piekoszowski, W., Breborowicz, G.H., 2004. The socio-economic status of women smoking during pregnancy and birth weight of their newborns. [Polish]. <i>Przegląd Lekarski</i> 61:1006-11.</p> <p>Adynski, H., Zimmer, C., Thorp, J., Santos, H.P., 2019. Predictors of psychological distress in low-income mothers over the first postpartum year. <i>Research in Nursing &amp; Health</i> 42:205-16.</p> <p>Ajami, M., Abdollahi, M., Salehi, F., Oldewage-Theron, W., Jamshidi-Naeini, Y., 2018. The association between household socioeconomic status, breastfeeding, and infants' anthropometric indices. <i>International Journal of Preventive Medicine</i> 9 (1) (no pagination).</p> <p>Akkaya, H., Buke, B., 2018a. Characteristic of first fetal movement maternal perception and the relationship with pregnancy outcomes at term. [Turkish]. <i>Zeynep Kamil Tıp Bulteni</i> 49:214-17.</p> <p>Akkaya, H., Buke, B., 2018b. A frequently asked question: Is it normal not to feel my baby's movements yet? <i>Journal of the Chinese Medical Association</i> 81:742-46.</p> <p>Akman, C., Uguz, F., Kaya, N., 2007. Postpartum-onset major depression is associated with personality disorders. <i>Comprehensive Psychiatry</i> 48:343-47.</p> <p>Al-Shahethi, A.H., Bulgiba, A., Zaki, R.A., Radman Al-Dubai, S.A., Al-Surimi, K.M., Al-Serouri, A.A., 2018. Neonatal Mortality in the Eastern Mediterranean Region: Socio-Demographic, Economic and Perinatal Factors, 1990-2013. <i>Iranian Journal of Pediatrics</i> 28:Jan-13.</p> <p>Alessie, R., Angelini, V., Mierau, J.O., Viluma, L., 2018. Economic downturns and infant health. <i>Economics &amp; Human Biology</i> 30:162-71.</p> <p>Alhusen, J.L., Gross, D., Hayat, M.J., Rose, L., Sharps, P., 2012. The Role of Mental Health on Maternal-Fetal Attachment in Low-Income Women. <i>JOGNN: Journal of Obstetric, Gynecologic &amp; Neonatal Nursing</i> 41:E71-81.</p> <p>Alhusen, J.L., Hayat, M.J., Gross, D., 2013. A longitudinal study of maternal attachment and infant developmental outcomes. <i>Archives of Women's Mental Health</i> 16:521.</p> <p>Alleman, B.W., Bell, E.F., Li, L., Dagle, J.M., Smith, P.B., Ambalavanan, N., Laughon, M.M., Stoll, B.J., Goldberg, R.N., et al., 2013. Individual and center-level factors affecting mortality among extremely low birth weight infants. <i>Pediatrics</i> 132:e175-e84.</p> <p>Althabe, F., Sosa, C., Belizán, J.M., Gibbons, L., Jacquerioz, F., Bergel, E., 2006. Cesarean section rates and maternal and neonatal mortality in low-, medium-, and high-income countries: an ecological study. <i>Birth: Issues in Perinatal Care</i> 33:270-77.</p> <p>Ammerman, R., Altaye, M., Putnam, F., Teeters, A., Zou, Y., Ginkel, J., 2015. Depression improvement and parenting in low-income mothers in home visiting. <i>Archives of Women's Mental Health</i> 18:555-63.</p> <p>Ancl, P.Y., Saurel-Cubizolles, M.J., Di Renzo, G.C., Papiernik, E., Breart, G., 1999. Social differences of very preterm birth in Europe: interaction with obstetric history. <i>Europop Group. American Journal of Epidemiology</i> 149:908-15.</p> <p>Anderson, C., Perez, C., 2015. Adolescent Psychological Birth Trauma Following Cesarean Birth. <i>Pediatric Nursing</i> 41:78-83.</p> <p>Andersson, S.W., Niklasson, A., Lapidus, L., Hallberg, L., Bengtsson, C., Hulthén, L., 2000. Sociodemographic characteristics influencing birth outcome in Sweden, 1908-1930. Birth variables in the Population Study of Women in Gothenburg. <i>Journal of Epidemiology &amp; Community Health</i>:269-78.</p> <p>Andersson, T., Bergstrom, S., Hogberg, U., 2000a. Swedish maternal mortality in the 19th century by different definitions: Previous stillbirths but not multiparity risk factor for maternal death. <i>Acta Obstetrica et Gynecologica Scandinavica</i> 79:679-86.</p> |

Andersson, T., Hogberg, U., Bergstrom, S., 2000b. Community-based prevention of perinatal deaths: Lessons from nineteenth-century Sweden. *International Journal of Epidemiology* 29:542-48.

Anonymous, 2005. Infant and perinatal mortality by social and biological factors, 2004. *Health statistics quarterly / Office for National Statistics*:62-66.

Appleton, A.A., Kiley, K., Holdsworth, E.A., Schell, L.M., 2019. Social Support During Pregnancy Modifies the Association Between Maternal Adverse Childhood Experiences and Infant Birth Size. *Maternal & Child Health Journal* 23:408-15.

Archanjo Ferraro, A., Rohde, L.A., Vanoni Polanczyk, G., Argeu, A., Miguel, E.C., Ferraz Ellero Grisi, S.J., Fleitlich-Bilyk, B., Ferraro, A.A., Polanczyk, G.V., et al., 2017. The specific and combined role of domestic violence and mental health disorders during pregnancy on new-born health. *BMC Pregnancy & Childbirth* 17:01-Oct.

Arikan, I., Barut, A., Gezer, S., Basaran, M., Harma, M., Bayar, U., 2010. Evaluation of the cesarean section cases: A 5-year experience. [Turkish]. *Turkiye Klinikleri Jinekoloji Obstetrik* 20:155-60.

Arntzen, A., Mortensen, L., Schnor, O., Cnattingius, S., Gissler, M., Andersen, A.M.N., 2008. Neonatal and postneonatal mortality by maternal education - A population-based study of trends in the Nordic countries, 1981-2000. *European Journal of Public Health* 18:245-51.

Arntzen, A., Samuelsen, S.O., Bakketeig, L.S., Stoltenberg, C., 2004. Socioeconomic status and risk of infant death: A population-based study of trends in Norway, 1967-1998. [Norwegian]. *Tidsskrift for den Norske Laegeforening* 124:2904-06.

Arntzen, A., Samuelsen, S.O., Daltveit, A.K., Stoltenberg, C., 2006. Post-neonatal mortality in Norway 1969-95: A cause-specific analysis. *International Journal of Epidemiology* 35:1083-89.

Astone, N.M., Misra, D., Lynch, C., 2007. The effect of maternal socio-economic status throughout the lifespan on infant birthweight. *Paediatric and Perinatal Epidemiology* 21:310-18.

Atar Gurel, S., Gurel, H., 2000. The evaluation of determinants of early postpartum low mood: The importance of parity and inter-pregnancy interval. *European Journal of Obstetrics and Gynecology and Reproductive Biology* 91:21-24.

Atreya, M., Muglia, L., Greenberg, J., DeFranco, E., 2017. Racial Differences in the Influence of Interpregnancy Interval on Fetal Growth. *Maternal & Child Health Journal* 21:562-70.

Attanasio, L.B., Kozhimannil, K.B., Srinivas, S.K., Kjerulff, K.H., 2017. Concordance between Women's Self-Reported Reasons for Cesarean Delivery and Hospital Discharge Records. *Womens Health Issues* 27:329-35.

Attar, M.A., Hanrahan, K., Lang, S.W., Gates, M.R., Bratton, S.L., 2006. Pregnant mothers out of the perinatal regionalization's reach. *Journal of Perinatology* 26:210-14.

Auger, N., Abrahamowicz, M., Wynant, W., Lo, E., 2014. Gestational age-dependent risk factors for preterm birth: associations with maternal education and age early in gestation. *European Journal of Obstetrics & Gynecology & Reproductive Biology* 176:132-36.

Auger, N., Park, A.L., Harper, S., Daniel, M., Roncarolo, F., Platt, R.W., 2012. Educational inequalities in preterm and term small-for-gestational-age birth over time. *Annals of Epidemiology* 22:160-7.

Bai, J., Wong, F.W., Bauman, A., Mohsin, M., 2002. Parity and pregnancy outcomes. *American Journal of Obstetrics and Gynecology* 186:274-78.

Bal, M., Şahin Ersoy, G., Demirtaş, Ö., Kurt, S., Taşyurt, A., 2016. Vitamin D deficiency in pregnancy is not associated with diabetes mellitus development in pregnant women at low risk for gestational diabetes. *Türk Jinekoloji ve Obstetrik Dergisi* 13:23-26.

Balik, G., Tekin, Y.B., Kağıtçı, M., 2015. Is there relationship between social support, psychological distress, mood disorders and emesis gravidarum? *Journal of Obstetrics & Gynaecology* 35:737-40.

Basso, O., Olsen, J., Christensen, K., 1999. Study of environmental, social, and paternal factors in preterm delivery using sibs and half sibs. A population-based study in Denmark. *Journal of Epidemiology & Community Health*:20-23.

Basso, O., Olsen, J., Johansen, A.M.T., Christensen, K., 1997. Change in social status and risk of low birth weight in Denmark: population based cohort study. *BMJ* 315:1498-502.

Beeghly, M., Olson, K.L., Weinberg, M.K., Pierre, S.C., Downey, N., Tronick, E.Z., 2003. Prevalence, stability, and socio-demographic correlates of depressive symptoms in black mothers during the first 18 months postpartum. *Maternal & Child Health Journal* 7:157-68.

Bell, R., Glinianaia, S.V., Tennant, P.W.G., Bilous, R.W., Rankin, J., 2012. Peri-conception hyperglycaemia and nephropathy are associated with risk of congenital anomaly in women with pre-existing diabetes: A population-based cohort study. *Diabetologia* 55:936-47.

Birkeland, R., Thompson, J., Phares, V., 2005. Adolescent Motherhood and Postpartum Depression. *Journal of Clinical Child and Adolescent Psychology* 34:292-300.

Borkowski, W., Mielniczuk, H., 2006. Length of postpartum women hospital stay. [Polish]. *Przegląd Epidemiologiczny* 60:163-70.

Boss, D.J., Timbrook, R.E., Fort Wayne Medical Education Research, G., 2001. Clinical obstetric outcomes related to continuity in prenatal care. *Journal of the American Board of Family Practice* 14:418-23.

Cage, R.A., Foster, J., 2002. Overcrowding and infant mortality: A tale of two cities. *Scottish Journal of Political Economy* 49:129-49.

Campana, H., Rittler, M., Gili, J.A., Poletta, F.A., Pawluk, M.S., Gimenez, L.G., Cosentino, V.R., Castilla, E.E., Camelo, J.S., 2017. Association between a Maternal History of Miscarriages and Birth Defects. *Birth Defects Research* 109:254-61.

Castiglioni, L., Schmiedeberg, C., 2018. Joint effect of education and age at childbirth on the risk of caesarean delivery: findings from Germany 2008-2015. *Public Health (Elsevier)* 155:01-Jul.

Catalano, R., Hansen, H.T., Hartig, T., 1999. The ecological effect of unemployment on the incidence of very low birthweight in Norway and Sweden. *Journal of Health and Social Behavior* 40:422-28.

Collingwood Bakeo, A., Clarke, L., 2006. Risk factors for low birthweight based on birth registration and census information, England and Wales, 1981-2000, *Health Statistics Quarterly / Office for National Statistics. Office for National Statistics*, pp. 15-21.

D'Onofrio, B.M., Class, Q.A., Rickert, M.E., Larsson, H., Långström, N., Lichtenstein, P., 2013. Preterm birth and mortality and morbidity: a population-based quasi-experimental study. *JAMA Psychiatry* 70:1231-40.

Dolatian, M., Sharifi, N., Mahmoodi, Z., 2018. Relationship of socioeconomic status, psychosocial factors, and food insecurity with preterm labor: A longitudinal study. *International Journal of Reproductive BioMedicine* 16:563-70.

Dominguez-Berjon, M.F., Benach, J., Garcia-Arcal, M.D., Borrell, C., 1999. Infant and perinatal mortality in Spain 1981-1991: Interprovincial variations in Autonomous Communities with extreme economic levels. *European Journal of Epidemiology* 15:723-29.

Dummer, T.J.B., Dickinson, H.O., Parker, L., 2003. Prevalence of adverse pregnancy outcomes around hazardous industrial sites in Cumbria, north-west England, 1950-93. *Paediatric and Perinatal Epidemiology* 17:250-55.

Eizaguirre-Garcia, D., Rodriguez-Andres, C., Watt, G.C., 2000. Congenital anomalies in Glasgow between 1982 and 1989 and chromium waste. *Journal of Public Health Medicine* 22:54-8.

Elovainio, M., Hakulinen, C., Pulkki-Råback, L., Virtanen, M., Josefsson, K., Jokela, M., Vahtera, J., Kivimäki, M., 2017. Contribution of risk factors to excess mortality in isolated and lonely individuals: an analysis of data from the UK Biobank cohort study. *The Lancet Public Health* 2:e260-e66.

Evans, M.A., Rosen, L.N., 2000. Demographic and psychosocial risk factors for preterm delivery in an active duty pregnant population. *Military Medicine* 165:49-53.

Fardin Fiorotti, K., Marques Goulart, J., Ferreira de Almeida Barbosa, B.L., Canicali Primo, C., de Fátima Almeida Lima, E., Marabotti Costa Leite, F., 2019. Anxiety in puerperae in high risk maternity hospital *Journal of Nursing UFPE / Revista de Enfermagem UFPE* 13:1300-07.

Fonseca, S.C., Flores, P.V.G., Camargo, K.R., Pinheiro, R.S., Coeli, C.M., 2017. Maternal education and age: inequalities in neonatal death. *Revista de Saude Publica* 51:94.

Froen, J.F., Arnestad, M., Frey, K., Vege, A., Saugstad, O.D., Stray-Pedersen, B., 2001. Risk factors for sudden intrauterine unexplained death: epidemiologic characteristics of singleton cases in Oslo, Norway, 1986-1995. *American Journal of Obstetrics & Gynecology* 184:694-702.

Gavin, A.R., Thompson, E., Rue, T., Guo, Y., Gavin, A.R., Thompson, E., Rue, T., Guo, Y., 2012. Maternal early life risk factors for offspring birth weight: findings from the add health study. *Prevention Science* 13:162-72.

Giani, U., Bruzzese, D., Pugliese, A., Saporito, M., Triassi, M., 2011. [Risk factors analysis for elective caesarean section in Campania region (Italy)]. [Italian]. *Epidemiologia e Prevenzione* 35:101-10.

Gisselmann, M.D., Hemström, O., 2008. The contribution of maternal working conditions to socio-economic inequalities in birth outcome. *Social Science & Medicine* 66:1297-309.

Gnavi, R., Costa, G., 2002. Pregnancy outcome, infant mortality and mother's education in Piedmont from 1980 to 1995. [Italian]. *Epidemiologia e Prevenzione* 26:225-33.

Guihard, P., Blondel, B., 2001. [Factors associated with cesarean section in France. Results from the 1995 National Perinatal Survey]. *Journal de Gynecologie, Obstetrique et Biologie de la Reproduction* 30:444-543.

Health, C.E.i.M.a.C., 2008. Why Children Die: A Pilot Study, in: Gale, P. (Ed.). *Confidential Enquiry into Maternal and Child Health*, London, pp. 1-113.

Hunker, D.F., Patrick, T.E., Albrecht, S.A., Wisner, K.L., 2009. Is difficult childbirth related to postpartum maternal outcomes in the early postpartum period? *Archives of Women's Mental Health* 12:211-19.

Jansen, P.W., Tiemeier, H., Jaddoe, V.W., Hofman, A., Steegers, E.A., Verhulst, F.C., Mackenbach, J.P., Raat, H., 2009. Explaining educational inequalities in preterm birth: the generation r study. *Archives of Disease in Childhood -- Fetal & Neonatal Edition* 94:F28-34.

Juárez, S., Revuelta-Eugercios, B.A., Ramiro-Fariñas, D., Viciana-Fernández, F., 2014. Maternal Education and Perinatal Outcomes Among Spanish Women Residing in Southern Spain (2001-2011). *Maternal and Child Health Journal* 18:1814-22.

Kambale Mastaki, J., 2012. Social predictors of caesarean section births in Italy. *African Health Sciences* 11:560-65.

Koller, D., Lack, N., Mielck, A., 2009. [Social differences in the utilisation of prenatal screening, smoking during pregnancy and birth weight—empirical analysis of data from the Perinatal Study in Bavaria (Germany)]. *Gesundheitswesen* 71:10-Aug.

Kottwitz, A., 2014. Mode of birth and social inequalities in health: The effect of maternal education and access to hospital care on cesarean delivery. *Health & Place* 27:Sep-21.

Kumar, A., Agarwal, K., Devi, S.G., Gupta, R.K., Batra, S., 2010. Hypocalcemia in pregnant women. *Biological Trace Element Research* 136:26-32.

Maconochie, N., Doyle, P., Prior, S., Simmons, R., 2007. Risk factors for first trimester miscarriage—results from a UK-population-based case-control study. *BJOG* 114:170.

Marquez-Calderon, S., Ruiz-Ramos, M., Juarez, S., Librero Lopez, J., 2011. [Caesarean delivery in Andalusia, Spain: relationship with social, clinical and health services factors (2007-2009)]. *Revista Espanola de Salud Publica* 85:205-15.

Marvin-Dowle, K., Kilner, K., Burley, V.J., Soltani, H., 2018. Impact of adolescent age on maternal and neonatal outcomes in the Born in Bradford cohort. *BMJ open* 8:e016258.

McCall, S.J., Green, D.R., Macfarlane, G.J., Bhattacharya, S., 2019. Spontaneous very preterm birth in relation to social class, and smoking: a temporal-spatial analysis of routinely collected data in Aberdeen, Scotland (1985-2010). *Journal of Public Health* 24.

Meis, P.J., Michielutte, R., Peters, T.J., Wells, H.B., Sands, R.E., Coles, E., Johns, K., 1997. Factors associated with term low birthweight in Cardiff, Wales. *Paediatric and Perinatal Epidemiology* 11:287-97.

Möller, L., Josefsson, A., Bladh, M., Lilliecreutz, C., Sydsjö, G., 2015. Reproduction and mode of delivery in women with vaginismus or localised provoked vestibulodynia: a Swedish register-based study. *BJOG: An International Journal of Obstetrics & Gynaecology* 122:329-34.

Mortensen, L.H., Diderichsen, F., Arntzen, A., Gissler, M., Cnattingius, S., Schnor, O., Davey-Smith, G., Nybo Andersen, A., 2008. Social inequality in fetal growth: a comparative study of Denmark, Finland, Norway and Sweden in the period 1981-2000 [corrected] [published erratum appears in J EPIDEMIOL COMMUNITY HEALTH 2008 May//62(5):472]. *Journal of Epidemiology & Community Health* 62:325-31.

Mortensen, L.H., Lauridsen, J.T., Diderichsen, F., Kaplan, G.A., Gissler, M., Andersen, A., 2010. Income-related and educational inequality in small-for-gestational age and preterm birth in Denmark and Finland 1987-2003. *Scandinavian Journal of Public Health* 38:40-45.

Najdawi, F., Faouri, M., 1999. Maternal smoking and breastfeeding. *Eastern Mediterranean Health Journal* 5:450-56.

O'Brien, M., Buikstra, E., Hegney, D., 2008. The influence of psychological factors on breastfeeding duration. *Journal of Advanced Nursing* 63:397.

Ozdin, S., Boke, O., Kocak, M.B., 2015. Sociodemographic features and treatments of pregnant psychiatric inpatients in an university hospital: A retrospective chart review. *Dusunen Adam* 28:96-102.

Pattenden, S., Dolk, H., Vrijheid, M., 1999. Inequalities in low birth weight: parental social class, area deprivation, and 'lone mother' status. *Journal of Epidemiology & Community Health*:355-58.

Peacock, J.L., Bland, J.M., Anderson, H.R., 1995. Preterm delivery: effects of socioeconomic factors, psychological stress, smoking, alcohol, and caffeine. *BMJ* 311:531-35.

Petersen, C.B., Mortensen, L.H., Morgen, C.S., Madsen, M., Schnor, O., Arntzen, A., Gissler, M., Cnattingius, S., Nybo Andersen, A.M., 2009. Socio-economic inequality in preterm birth: a comparative study of the Nordic countries from 1981 to 2000. *Paediatric and Perinatal Epidemiology* 23:66-75.

Power, C., Li, L., 2000. Cohort study of birthweight, mortality, and disability. *BMJ* 320:840-41.

Prochazka, M., Kudela, M., Lubusky, M., Vetr, M., Hrachovec, P., Zielina, P., 2005. Premature separation of the placenta - Etiology and risk factors. [Czech]. *Ceska Gynekologie* 70:175-79.

Racape, J., Schoenborn, C., Sow, M., Alexander, S., De Spiegelaere, M., 2016. Are all immigrant mothers really at risk of low birth weight and perinatal mortality? The crucial role of socio-economic status. *BMC Pregnancy & Childbirth* 16:01-Oct.

Rahmqvist, M., 2006. The close relation between birth, abortion and employment rates in Sweden from 1980 to 2004. *Social Science & Medicine* 63:1262-66.

|                                                                            |                                                                                                                                                                                                                                                                                                                                                                                                                                                                                                                                                                                                                                                                                                                                                                                                                                                                                                                                                                                                                                                                                                                                                                                                                                                                                                                                                                                                                                                                                                                                                                                                                                                                                                                                                                                                                                                                                                                                                                                                                                                                                                                                                                                                                                                                                                                                                                                                                                                                                                                                                                                                                                                                                                                                                                                                                                                                                                                                                                                                                                                                                                                                                                                                                                                                                                                                                                                                                                                                                                                                                                                                                                                                                                                                                                                                                                                                                                                                                                                                                                                                                                                                                                                                                                                                                                                                                                                                                                                                                                                                                                                                                                                                                                                                                                                                                                                                                                                                                                                                                                                                                                                                                                                                                                                                                                                                                                                                                                                                                                                                                                                                                                                                                                                                                                                                                                                                                                                                                                                                                                                                                                                                                                                                                                                                                                                                                                                                                                                                                                                                                                                                                                                                                                                                                                                                                                                                                                                                                                                                                                                                                                                                                                                                                    |
|----------------------------------------------------------------------------|--------------------------------------------------------------------------------------------------------------------------------------------------------------------------------------------------------------------------------------------------------------------------------------------------------------------------------------------------------------------------------------------------------------------------------------------------------------------------------------------------------------------------------------------------------------------------------------------------------------------------------------------------------------------------------------------------------------------------------------------------------------------------------------------------------------------------------------------------------------------------------------------------------------------------------------------------------------------------------------------------------------------------------------------------------------------------------------------------------------------------------------------------------------------------------------------------------------------------------------------------------------------------------------------------------------------------------------------------------------------------------------------------------------------------------------------------------------------------------------------------------------------------------------------------------------------------------------------------------------------------------------------------------------------------------------------------------------------------------------------------------------------------------------------------------------------------------------------------------------------------------------------------------------------------------------------------------------------------------------------------------------------------------------------------------------------------------------------------------------------------------------------------------------------------------------------------------------------------------------------------------------------------------------------------------------------------------------------------------------------------------------------------------------------------------------------------------------------------------------------------------------------------------------------------------------------------------------------------------------------------------------------------------------------------------------------------------------------------------------------------------------------------------------------------------------------------------------------------------------------------------------------------------------------------------------------------------------------------------------------------------------------------------------------------------------------------------------------------------------------------------------------------------------------------------------------------------------------------------------------------------------------------------------------------------------------------------------------------------------------------------------------------------------------------------------------------------------------------------------------------------------------------------------------------------------------------------------------------------------------------------------------------------------------------------------------------------------------------------------------------------------------------------------------------------------------------------------------------------------------------------------------------------------------------------------------------------------------------------------------------------------------------------------------------------------------------------------------------------------------------------------------------------------------------------------------------------------------------------------------------------------------------------------------------------------------------------------------------------------------------------------------------------------------------------------------------------------------------------------------------------------------------------------------------------------------------------------------------------------------------------------------------------------------------------------------------------------------------------------------------------------------------------------------------------------------------------------------------------------------------------------------------------------------------------------------------------------------------------------------------------------------------------------------------------------------------------------------------------------------------------------------------------------------------------------------------------------------------------------------------------------------------------------------------------------------------------------------------------------------------------------------------------------------------------------------------------------------------------------------------------------------------------------------------------------------------------------------------------------------------------------------------------------------------------------------------------------------------------------------------------------------------------------------------------------------------------------------------------------------------------------------------------------------------------------------------------------------------------------------------------------------------------------------------------------------------------------------------------------------------------------------------------------------------------------------------------------------------------------------------------------------------------------------------------------------------------------------------------------------------------------------------------------------------------------------------------------------------------------------------------------------------------------------------------------------------------------------------------------------------------------------------------------------------------------------------------------------------------------------------------------------------------------------------------------------------------------------------------------------------------------------------------------------------------------------------------------------------------------------------------------------------------------------------------------------------------------------------------------------------------------------------------------------------------------------------------------------|
|                                                                            | <p>Räisänen, S., Randell, K., Nielsen, H.S., Gissler, M., Kramer, M.R., Klemetti, R., Heinonen, S., 2013. Socioeconomic status affects the prevalence, but not the perinatal outcomes, of in vitro fertilization pregnancies. <i>Human Reproduction</i> 28:3118-25.</p> <p>Rauchfuss, M., Altrogge, C., 2002. Partnership and pregnancy. [German]. <i>Sexuologie</i> 9:61-74.</p> <p>Reeske, A., Kutschmann, M., Razum, O., Spallek, J., 2011. Stillbirth differences according to regions of origin: An analysis of the German perinatal database, 2004-2007. <i>BMC Pregnancy and Childbirth</i> 11 (no pagination).</p> <p>Rendall, M.S., Smallwood, S., 2003. Higher qualifications, first-birth timing and further childbearing in England and Wales. <i>Population Trends-London</i>:-18-26.</p> <p>Romero Gutierrez, G., Baron Vazquez, S., Avecilla Hernandez, A.A., Ponce de Leon, A.L.P., 2003. Unsuspected molar pregnancy in first trimester spontaneous abortion. [Spanish]. <i>Ginecologia y Obstetricia de Mexico</i> 71:55-59.</p> <p>Ronda, E., Hernandez-Mora, A., Garcia, A.M., Regidor, E., 2009. [Maternal occupation, pregnancy length and low birth weight]. <i>Gaceta Sanitaria</i> 23:179-85.</p> <p>Rosen, D., Seng, J.S., Tolman, R.M., Mallinger, G., 2007. Intimate Partner Violence, Depression, and Posttraumatic Stress Disorder as Additional Predictors of Low Birth Weight Infants Among Low-Income Mothers. <i>Journal of Interpersonal Violence</i> 22:1305-14.</p> <p>Rymkiewicz, L., Leibschang, J., Filipp, E., Mazur, J., 2003. Demographic and socioeconomic risk factors of preterm delivery. [Polish]. <i>Medycyna Wieku Rozwojowego</i> 7:149-56.</p> <p>Salazar-Pousada, D., Astudillo, C., Gonzaga, M., Hidalgo, L., Pérez-López, F.R., Chedraui, P., Salazar-Pousada, D., Astudillo, C., Gonzaga, M., et al., 2012. Intimate partner violence and psychoemotional disturbance among pregnant women admitted to hospital with prenatal complications. <i>International Journal of Gynecology &amp; Obstetrics</i> 118:194-97.</p> <p>Sidebottom, A.C., 2017. Prenatal depressive symptoms and social support: An examination of their roles in prenatal care adequacy, birth outcomes, and postpartum depressive symptoms among low-income urban women. Dissertation Abstracts International: Section B: The Sciences and Engineering 77:No Pagination Specified.</p> <p>Silva, L.M., Steegers, E.A.P., Burdorf, A., Jaddoe, V.W.V., Arends, L.R., Hofman, A., Mackenbach, J.P., Raat, H., 2008. No midpregnancy fall in diastolic blood pressure in women with a low educational level: The generation R study. <i>Hypertension</i> 52:645-51.</p> <p>Skorzynska, H., Rudnicka-Drozak, E., 1999. Social and medical factors of risk of premature births and prematurity. <i>Annales Universitatis Mariae Curie-Skłodowska - Sectio d - Medicina</i> 54:345-50.</p> <p>Sloggett, A., Joshi, H., 1994. Higher mortality in deprived areas: community or personal disadvantage? <i>BMJ</i> 309:1470-74.</p> <p>Smith, G.D., Hart, C., Hole, D., MacKinnon, P., Gillis, C., Watt, G., Blane, D., Hawthorne, V., 1998. Education and occupational social class: which is the more important indicator of mortality risk? <i>Journal of Epidemiology &amp; Community Health</i> 52:153-60.</p> <p>Sole, K.B., Staff, A.C., Laine, K., 2018. The association of maternal country of birth and education with hypertensive disorders of pregnancy: A population-based study of 960 516 deliveries in Norway. <i>Acta Obstetrica et Gynecologica Scandinavica</i> 97:1237-47.</p> <p>Spencer, N.J., Logan, S., Gill, L., 1999. Trends and social patterning of birthweight in Sheffield, 1985-94. <i>Archives of Disease in Childhood: Fetal and Neonatal Edition</i> 81:F138-F40.</p> <p>Stolberg, C., Becker, S., 2015. Health inequality at the beginning of life: The influence of maternal education on the probability of preterm birth. <i>Kolner Zeitschrift für Soziologie und Sozialpsychologie</i> 67:321-54.</p> <p>Taveras, E.M., Capra, A.M., Braveman, P.A., Jensvold, N.G., Escobar, G.J., Lieu, T.A., 2003. Clinician support and psychosocial risk factors associated with breastfeeding discontinuation. <i>Pediatrics</i> 112:108-15.</p> <p>Tessier, V., Leroux, S., Guseva-Canu, I., 2017. Maternal deaths related to social vulnerabilities. Results from the French confidential enquiry into maternal deaths, 2010-2012. <i>Gynecologie Obstetrique Fertilité et Senologie</i> 45:S84-S88.</p> <p>Tutkuvienė, J., Morkuniene, R., Bartkute, K., Drazdiene, N., 2011. Body size of newborns in relation to mother's ethnicity and education: a pilot study from Vilnius City (Lithuania), 2005-2010. <i>Anthropologischer Anzeiger</i> 68:471-84.</p> <p>Uria, M., Mosquera, C., 1999. Legal abortion in Asturias (Spain) after the 1985 law: Sociodemographic characteristics of women applying for abortion. <i>European Journal of Epidemiology</i> 15:59-64.</p> <p>van Dillen, J., Stekelenburg, J., Schutte, J., Walraven, G., van Roosmalen, J., 2007. The use of audit to identify maternal mortality in different settings: is it just a difference between the rich and the poor? <i>Healthcare Quarterly</i> 10:131-37.</p> <p>Van Hagen, I.M., Baart, S., Fong Soe Khioe, R., Sliwa-Hahnle, K., Taha, N., Lelonek, M., Tavazzi, L., Maggioni, A.P., Johnson, M.R., et al., 2018. Influence of socioeconomic factors on pregnancy outcome in women with structural heart disease. <i>Heart</i> 104:745-52.</p> <p>Vikanes, Å., Grijbovski, A., Vangen, S., Magnus, P., 2008. Variations in prevalence of hyperemesis gravidarum by country of birth: a study of 900,074 pregnancies in Norway, 1967-2005. <i>Scandinavian Journal of Public Health</i> 36:135-42.</p> <p>Vikanes, A., Grijbovski, A.M., Vangen, S., Gunnes, N., Samuelsen, S.O., Magnus, P., 2010. Maternal body composition, smoking, and hyperemesis gravidarum. <i>Annals of Epidemiology</i> 20:592-98.</p> <p>Wang, S., Guendelman, S., Harley, K., Eskenazi, B., 2018. When Fathers are Perceived to Share in the Maternal Decision to Breastfeed: Outcomes from the Infant Feeding Practices Study II. <i>Maternal &amp; Child Health Journal</i> 22:1676-84.</p> <p>Whitehead, M., Drever, F., 1999. Narrowing social inequalities in health? Analysis of trends in mortality among babies of lone mothers: short version 2. <i>British Medical Journal</i> 318:912-14.</p> <p>Whitehead, M., Drever, F., 1999. Short version 1: Narrowing social inequalities in health? Analysis of trends in mortality among babies of lone mothers: BMJ BMJ. <i>British Medical Journal</i> 318:908-12.</p> <p>Zeitlin, J., Blondel, B., Ananth, C., 2015. Characteristics of Childbearing Women, Obstetrical Interventions and Preterm Delivery: A Comparison of the US and France. <i>Maternal &amp; Child Health Journal</i> 19:1107-14.</p> <p>Zhu, J.L., Hjollund, N.H., Andersen, A.M., Olsen, J., 2004. Shift work, job stress, and late fetal loss: The National Birth Cohort in Denmark. <i>Journal of Occupational &amp; Environmental Medicine</i> 46:1144-9.</p> |
| The paper only details data from a restricted population/sub-group (n=180) | <p>Addor, V., Narring, F., Michaud, P.A., 2003. Abortion trends 1990-1999 in a Swiss region and determinants of abortion recurrence. <i>Swiss Medical Weekly</i> 133:219-26.</p> <p>Allen, J., Hippisley-Cox, J., Pringle, M., Groom, L., 2003. Assisted delivery in the teenage population: the effect of inter-hospital variation, deprivation, and age. <i>International Journal of Adolescent Medicine &amp; Health</i> 15:341-47.</p> <p>Alonso Cuesta, R., Moreno, R., 2000. Motherhood in adolescent ages: Consequences. <i>Revista de Psiquiatria Infanto-Juvenil</i> 1:06-Nov.</p> <p>Arendt, L.H., Lindhard, M.S., Henriksen, T.B., Olsen, J., Cnattingius, S., Petersson, G., Parner, E.T., Ramlau-Hansen, C.H., 2018. Maternal Diabetes Mellitus and Genital Anomalies in Male Offspring: A Nationwide Cohort Study in 2 Nordic Countries. <i>Epidemiology</i> 29:280-89.</p> <p>Axelin, A., Lehtonen, L., Pelander, T., Salanterä, S., 2010. Mothers' Different Styles of Involvement in Preterm Infant Pain Care. <i>JOGNN - Journal of Obstetric, Gynecologic, and Neonatal Nursing</i> 39:415-24.</p> <p>Balázs, P., Rákóczi, I., Greczer, A., Foley, K.L., 2014. Birth-weight differences of Roma and non-Roma neonates--public health implications from a population-based study in Hungary. <i>Central European Journal of Public Health</i> 22:24-28.</p>                                                                                                                                                                                                                                                                                                                                                                                                                                                                                                                                                                                                                                                                                                                                                                                                                                                                                                                                                                                                                                                                                                                                                                                                                                                                                                                                                                                                                                                                                                                                                                                                                                                                                                                                                                                                                                                                                                                                                                                                                                                                                                                                                                                                                                                                                                                                                                                                                                                                                                                                                                                                                                                                                                                                                                                                                                                                                                                                                                                                                                                                                                                                                                                                                                                                                                                                                                                                                                                                                                                                                                                                                                                                                                                                                                                                                                                                                                                                                                                                                                                                                                                                                                                                                                                                                                                                                                                                                                                                                                                                                                                                                                                                                                                                                                                                                                                                                                                                                                                                                                                                                                                                                                                                                                                                                                                                                                                                                                                                                                                                                                                                                                                                                                                                                                                                                                      |

Bales, M., Pambrun, E., Melchior, M., Glangeaud-Freudenthal, N.M., Charles, M.A., Verdoux, H., Sutter-Dallay, A.L., 2015. Prenatal psychological distress and access to mental health care in the ELFE cohort. *European Psychiatry: the Journal of the Association of European Psychiatrists* 30:322-8.

Baron, M.A., Solano, L., Llovera, D., Pena, E., 2003. Vitamin A status in pregnant adolescents of low socioeconomic income. [Spanish]. *Archivos Latinoamericanos de Nutricion* 53:364-68.

Barrell, M., 2000. Educational experiences of adolescent mothers. *Practising Midwife* 3:30-2.

Barton, K., Redshaw, M., Quigley, M.A., Carson, C., 2017. Unplanned pregnancy and subsequent psychological distress in partnered women: a cross-sectional study of the role of relationship quality and wider social support. *BMC Pregnancy & Childbirth* 17:01-Sep.

Basso, O., Olsen, J., Christensen, K., 1999. Recurrence risk of congenital anomalies - The impact of paternal, social, and environmental factors: A population-based study in Denmark. *American Journal of Epidemiology* 150:598-604.

Baste, V., Moen, B.E., Riise, T., Hollund, B.E., Øyen, N., 2008. Infertility and spontaneous abortion among female hairdressers: the Hordaland Health Study. *Journal of Occupational & Environmental Medicine* 50:1371-77.

Bech, B.H., Kjaersgaard, M.I.S., Pedersen, H.S., Howards, P.P., Sorensen, M.J., Olsen, J., Parner, E.T., Pedersen, L.H., Vestergaard, M., et al., 2014. Use of antiepileptic drugs during pregnancy and risk of spontaneous abortion and stillbirth: Population based cohort study. *BMJ (Online)* 349 (no pagination).

Bereczky, L.K., Kiss Sz, L., Szabo, B., 2015. Increased frequency of gestational and delivery-related complications in women of 35 years of age and above. *Journal of Obstetrics and Gynaecology* 35:115-20.

Bhandari, S., Raja, E.A., Shetty, A., Bhattacharya, S., 2014. Maternal and perinatal consequences of antepartum haemorrhage of unknown origin. *BJOG* 121:44-52.

Blanquet-Garcia, J., Montoya-Cazarez, A., Carranza-Lira, S., 2016. Sociodemographic characteristics of the pregnant adolescent in a high specialty hospital. [Spanish]. *Revista medica del Instituto Mexicano del Seguro Social* 54:S238-S41.

Blatter, B.M., Roelvelde, N., Bermejo, E., Martinez-Frias, M.L., Siffel, C., Czeizel, A.E., 2000. Spina bifida and parental occupation: results from three malformation monitoring programs in Europe. *European Journal of Epidemiology* 16:343-51.

Bobak, M., Dejmek, J., Solansky, I., Sram, R.J., 2005. Unfavourable birth outcomes of the Roma women in the Czech Republic and the potential explanations: A population-based study. *BMC Public Health* 5 (no pagination).

Bodén, R., Lundgren, M., Brandt, L., Reutfors, J., Andersen, M., Kieler, H., 2012. Risks of adverse pregnancy and birth outcomes in women treated or not treated with mood stabilisers for bipolar disorder: population based cohort study. *BMJ : British Medical Journal (Online)* 345:n.

Bonzini, M., Coggon, D., Godfrey, K., Inskip, H., Crozier, S., Palmer, K., 2009. Occupational physical activities, working hours and outcome of pregnancy: findings from the Southampton Women's Survey. *Occupational and environmental medicine* 66:685-90.

Borkowski, W., Mielniczuk, H., 2007. Social and health factors of respiratory distress syndrome in preterm infants. [Polish]. *Ginekologia Polska* 78:856-60.

Brick, A., Layte, R., Nolan, A., Turner, M.J., 2016. Differences in nulliparous caesarean section rates across models of care: a decomposition analysis. *BMC health services research* 16:239.

Bruckner, T.A., Mortensen, L.H., Catalano, R.A., 2017. Social and demographic drivers of trend and seasonality in elective abortions in Denmark. *BMC Pregnancy and Childbirth* 17 (1) (no pagination).

Budd, J.L.S., Draper, E.S., Lotto, R.R., Berry, L.E., Smith, L.K., 2015. Socioeconomic inequalities in pregnancy outcome associated with Down syndrome: a population-based study. *Archives of Disease in Childhood. Fetal and Neonatal Edition* 100:F400.

Burdorf, A., Brand, T., Jaddoe, V.W., Hofman, A., Mackenbach, J.P., Steegers, E.A., 2011a. The effects of work-related maternal risk factors on time to pregnancy, preterm birth and birth weight: the Generation R Study. *Occupational & Environmental Medicine* 68:197-204.

Burdorf, A., Brand, T., Jaddoe, V.W., Hofman, A., Mackenbach, J.P., Steegers, E.A.P., 2011b. The effects of work-related maternal risk factors on time to pregnancy, preterm birth and birth weight: The generation R study. *Occupational and Environmental Medicine* 68:197-204.

Burke, N., Burke, G., Breathnach, F., McAuliffe, F., Morrison, J.J., Turner, M., Dornan, S., Higgins, J.R., Cotter, A., et al., 2017. Prediction of cesarean delivery in the term nulliparous woman: results from the prospective, multicenter Genesis study. *American Journal of Obstetrics and Gynecology* 216:S98. e1-98. e11.

Cameron, S.T., Riddell, J., Brown, A., Thomson, A., Melville, C., Flett, G., Caird, L., Laird, G., 2016. Characteristics of women who present for abortion towards the end of the mid-trimester in Scotland: national audit 2013-2014. *European Journal of Contraception & Reproductive Health Care* 21:183-88.

Candel Pau, J., Perapoch López, J., Castillo Salinas, F., Sánchez García, O., Pérez Hoyos, S., Llurba Olivé, E., 2016. Neurodevelopment in preterm infants with and without placenta-related intrauterine growth restriction and its relation to perinatal and postnatal factors. *Journal of Maternal-Fetal & Neonatal Medicine* 29:2268-74.

Carayol, M., Zeitlin, J., Roman, H., Le Ray, C., Breart, G., Goffinet, F., Premoda Study, G., 2007. Non-clinical determinants of planned cesarean delivery in cases of term breech presentation in France. *Acta Obstetrica et Gynecologica Scandinavica* 86:1071-8.

Cieminski, A., 2011. Mode of delivery in women with prior cesarean section the effect of non medical factors and obstetric history. *Ginekologia i Poloznictwo* 21:57-64.

Cosson, E., Bihan, H., Reach, G., Vittaz, L., Carbillon, L., Valensi, P., 2015. Psychosocial deprivation in women with gestational diabetes mellitus is associated with poor fetomaternal prognoses: An observational study. *BMJ Open* 5 (3) (no pagination).

de Carvalho Alves, N.C., Feitosa, K.M.A., Mendes, M.E.S., de Fátima Costa Caminha, M., 2017. Complications in pregnancy in women aged 35 or older. *Revista Gaucha de Enfermagem* 38:01-Jul.

Dejin-Karlsson, E., Östergren, P., 2004. Country of origin, social support and the risk of small for gestational age birth. *Scandinavian Journal of Public Health* 32:442-49.

Dimitriu, M., Ionescu, C.A., Matei, A., Viezuina, R., Rosu, G., Ilincă, C., Banacu, M., Ples, L., 2019. The problems associated with adolescent pregnancy in Romania: A cross-sectional study. *Journal of Evaluation in Clinical Practice* 25:117-24.

Dingemann, C., Sonne, M., Ure, B., Bohnhorst, B., Von Kaisenberg, C., Pirr, S., 2019. Impact of maternal education on the outcome of newborns requiring surgery for congenital malformations. *PLoS One* 14 (4) (no pagination).

Domanski, G., Lange, A.E., Ittermann, T., Allenberg, H., Spoo, R.A., Zygmunt, M., Heckmann, M., 2018. Evaluation of neonatal and maternal morbidity in mothers with gestational diabetes: a population-based study. *BMC Pregnancy and Childbirth* 18:367.

Draper, E., Gallimore, I., Kurinczuk, J., Smith, P., Bobby, T., Smith, L., Manktelow, B., 2018. MBRRACE-UK perinatal mortality surveillance report, UK perinatal deaths for births from January to December 2016. Leicester: The Infant Mortality and Morbidity Studies, Department of Health Sciences, University of Leicester.

Duma, O., Puflea, G., 2007. Perinatal mortality issues in Botosani County. [Romanian]. *Revista medico-chirurgicala a Societatii de Medici si Naturalisti din Iasi* 111:250-54.

Edvardsson, K., Lindkvist, M., Eurenus, E., Mogren, I., Small, R., Ivarsson, A., 2013. A population-based study of overweight and obesity in expectant parents: socio-demographic patterns and within-couple associations. *BMC Public Health* 13:923.

Eskild, A., Nesheim, B.I., Busund, B., Vatten, L., Vangen, S., 2007. Childbearing or induced abortion: The impact of education and ethnic background. Population study of Norwegian and Pakistani women in Oslo, Norway. *Acta Obstetrica et Gynecologica Scandinavica* 86:298-303.

Esscher, A., Binder-Finnema, P., Bodker, B., Hogberg, U., Mulic-Lutvica, A., Essen, B., 2014. Suboptimal care and maternal mortality among foreign-born women in Sweden: Maternal death audit with application of the 'migration three delays' model. *BMC Pregnancy and Childbirth* 14 (1) (no pagination).

Facchinetti, F., Ottolini, F., Fazio, M., Rigatelli, M., Volpe, A., 2007. Psychosocial factors associated with preterm uterine contractions. *Psychotherapy and Psychosomatics* 76:391-94.

Facciola, A., A, D.I.P., Visalli, G., Panagia, P., Raffa, R., Triolo, O., Denaro, A., Riso, R., 2018. Risk factors for voluntary interruption of pregnancy and possible preventive public health actions. *Journal of Preventive Medicine and Hygiene* 59:E311-E14.

Flory, F., Manouana, M., Janky, E., Kadhel, P., 2014. Sociodemographic and medical features of abortion among underage people in Guadeloupe (French West Indies). [French]. *Gynecologie Obstetrique et Fertilité* 42:240-45.

Font-Ribera, L., Perez, G., Espelt, A., Salvador, J., Borrell, C., 2009. Determinants of induced abortion delay. [Spanish]. *Gaceta Sanitaria* 23:415-19.

Fuster, V., Santos, C., 2016. Determinants of birth weight in Portugal: 1988 to 2011. *Anthropologischer Anzeiger// Bericht über die biologisch-anthropologische Literatur* 73:33-43.

Fuster, V., Zuluaga, P., Román-Busto, J., 2014. Stillbirth incidence in Spain: A comparison of native and recent immigrant mother. *Demographic Research* 31:889-912.

Gante, I., Ferreira, A.C., Pestana, G., Pires, D., Amaral, N., Dores, J., do Ceu Almeida, M., Sandoval, J.L., 2018. Maternal educational level and the risk of persistent post-partum glucose metabolism disorders in women with gestational diabetes mellitus. *Acta Diabetologica* 55:243-51.

Garlantézec, R., Monfort, C., Rouget, F., Cordier, S., 2009. Maternal occupational exposure to solvents and congenital malformations: a prospective study in the general population. *Occupational & Environmental Medicine* 66:456-63.

Gissler, M., Pakkanen, M., Olausson, P.O., 2003. Fertility and perinatal health among Finnish immigrants in Sweden. *Social Science & Medicine* 57:1443-54.

Goedhart, G., Van Eijdsen, M., Van Der Wal, M.F., Bonsel, G.J., 2008. Ethnic differences in term birthweight: The role of constitutional and environmental factors. *Paediatric and Perinatal Epidemiology* 22:360-68.

González-Rábago, Y., Rodríguez-Alvarez, E., Borrell, L.N., Martín, U., 2017. The role of birthplace and educational attainment on induced abortion inequalities. *BMC Public Health* 17:01-Jul.

Gueron-Sela, N., Atzaba-Poria, N., Meiri, G., Marks, K., 2013. Prematurity, ethnicity and personality: risk for postpartum emotional distress among Bedouin-Arab and Jewish women. *Journal of Reproductive & Infant Psychology* 31:81-93.

Harding, S., Boroujerdi, M., Santana, P., Cruickshank, J.K., 2006a. Decline in, and lack of difference between, average birth weights among African and Portuguese babies in Portugal. *International Journal of Epidemiology* 35:270-76.

Harding, S., Santana, P., Cruickshank, J.K., Boroujerdi, M., Harding, S., Santana, P., Cruickshank, J.K., Boroujerdi, M., 2006b. Birth weights of black African babies of migrant and nonmigrant mothers compared with those of babies of European mothers in Portugal. *Annals of Epidemiology* 16:572-79.

Heidecker, B., Spencer, R.M., Hayes, V., Hall, S., Parikh, N., Stock, E.O., Redberg, R., 2017. High Prevalence and Clinical/Sociodemographic Correlates of Miscarriages Among Flight Attendants. *American Journal of Medicine* 130:1397-401.

Hemminki, E., Klemetti, R., Gissler, M., 2009. Cesarean section rates among health professionals in Finland, 1990-2006. *Acta Obstetrica et Gynecologica Scandinavica* 88:1138-44.

Henderson, J.M.P., Jomeen, J.P.M.A.R.M.R.G.N., Redshaw, M.B.A.P., 2018. Care and self-reported outcomes of care experienced by women with mental health problems in pregnancy: Findings from a national survey. *Midwifery* 56:171.

Higgins, J.R., Walshe, J.J., Conroy, R.M., Darling, M.R.N., 2002. The relation between maternal work, ambulatory blood pressure, and pregnancy hypertension. *Journal of Epidemiology & Community Health* 389-93.

Humphrey, T., Tucker, J.S., 2009. Rising rates of obstetric interventions: exploring the determinants of induction of labour. *Journal of Public Health* 31:88-94.

Jacquemyn, Y., Benjahia, N., Martens, G., Yuksel, H., Van Egmond, K., Temmerman, M., 2012. Pregnancy outcome of Moroccan and Turkish women in Belgium. *Clinical and Experimental Obstetrics and Gynecology* 39:181-85.

Joyce, R., Webb, R., Peacock, J., 1999. Social class and census-based deprivation scores: which is the best predictor of stillbirth rates? *Paediatric and Perinatal Epidemiology* 13:269-77.

Justad-Berg, R.T., Eskild, A., Strøm-Roum, E.M., 2015. Characteristics of women with repeat termination of pregnancy: a study of all requests for pregnancy termination in Norway during 2007-2011. *Acta Obstetrica et Gynecologica Scandinavica* 94:1175-80.

Kalafat, E., Morales-Rosello, J., Thilaganathan, B., Tahera, F., Khalil, A., 2018. Risk of operative delivery for intrapartum fetal compromise in small-for-gestational-age fetuses at term: an internally validated prediction model. *American Journal of Obstetrics and Gynecology* 218:134. e1-34. e8.

Kara, N., Kalem, M.N., Balci, H., Kalem, Z., Yuce, E., Iltemir Duvar, Z.C., 2016. Psychiatric Symptoms, Perceived Social Support, Coping Styles, and Dyadic Adjustment in Pregnant Women with Hyperemesis Gravidarum. *Dusunen Adam: Journal of Psychiatry & Neurological Sciences* 29:307-16.

Karlstroem, A., Raadestad, I., Eriksson, C., Rubertsson, C., Nystedt, A., Hildingsson, I., 2010. Cesarean Section without Medical Reason, 1997 to 2006: A Swedish Register Study. *Birth: Issues in Perinatal Care* 37:Nov-20.

Kelly, Y., Panico, L., Bartley, M., Marmot, M., Nazroo, J., Sacher, A., 2009. Why Does Birthweight Vary Among Ethnic Groups in the UK?: Findings from the Millennium Cohort Study. *Journal of Public Health* 31:131-37.

Khabouze, S., Berrada, R., Ferhati, D., Bouchikhi, C., El Hanchi, Z., Kharbach, A., Bouguern, H., Chahtane, A., Chaoui, A., 1999. Rupture of the uterus. A review of 292 cases. [French]. *Revue Francaise de Gynecologie et d'Obstetrique* 94:399-404.

Khanolkar, A.R., Wedren, S., Essen, B., Sparen, P., Koupil, I., 2015. Preterm and postterm birth in immigrant- and Swedish-born parents: a population register-based study. *European Journal of Epidemiology* 30:435-47.

Khoshnood, B., De Vigan, C., Blondel, B., Vodovar, V., Cadio, E., Goffinet, F., 2008. Long-term trends for socio-economic differences in prenatal diagnosis of Down syndrome: diffusion of services or persistence of disparities? *BJOG* 115:1087.

Khoshnood, B., Lelong, N., Andrieu, T., Houyel, L., Bonnet, D., Jouannic, J.M., Goffinet, F., Calderon, J., Candilis, D., et al., 2016. Assessing sociodemographic differences (or lack thereof) in prenatal diagnosis of congenital heart defects: A population-based study. *BMJ Open* 6 (3) (no pagination).

Knudsen, T.M., Hansen, A.V., Garne, E., Andersen, A.M., 2014a. Increased risk of severe congenital heart defects in offspring exposed to selective serotonin-reuptake inhibitors in early pregnancy--an epidemiological study using validated EUROCAT data. *BMC Pregnancy & Childbirth* 14:333.

Knudsen, T.M., Hansen, A.V., Garne, E., Andersen, A.M.N., 2014b. Increased risk of severe congenital heart defects in offspring exposed to selective serotonin-reuptake inhibitors in early pregnancy - an epidemiological study using validated EUROCAT data. *BMC Pregnancy and Childbirth* 14 (1) (no pagination).

Kolstad, E., Gilhus, N.E., Veiby, G., Reiter, S.F., Lossius, M.I., Bjork, M., 2015. Epilepsy and eating disorders during pregnancy: Prevalence, complications and birth outcome. *Seizure* 28:81-84.

Kopec, J., Ogonowski, J., Rahman, M., Miazgowski, T., 2015. Patient-reported outcomes in women with gestational diabetes: A longitudinal study. *International Journal of Behavioral Medicine* 22:206-13.

Kringeland, T., Daltveit, A.K., Møller, A., 2010. How does preference for natural childbirth relate to the actual mode of delivery? A population-based cohort study from Norway. *Birth: Issues in Perinatal Care* 37:21-27.

Kumari, S., Joshi, S., 2013. Neonatal outcomes in women with depression during pregnancy. *Journal of Projective Psychology & Mental Health* 20:141-45.

Kwegyir-Afful, E., Lamminpää, R., Selander, T., Gissler, M., Vehviläinen-Julkunen, K., Heinonen, S., Sallmen, M., Räsänen, K., 2018. Manual handling of burdens as a predictor of birth outcome—a Finnish Birth Register Study. *European Journal of Public Health* 28:1122-26.

Laanpere, M., Ringmets, I., Part, K., Allvee, K., Veerus, P., Karro, H., 2014. Abortion trends from 1996 to 2011 in Estonia: Special emphasis on repeat abortion. *BMC Women's Health* 14 (1) (no pagination).

Lanting, C.I., Buitendijk, S.E., Crone, M.R., Segaar, D., Gravenhorst, J.B., van Wouwe, J.P., 2009. Clustering of socioeconomic, behavioural, and neonatal risk factors for infant health in pregnant smokers. *PLoS One* 4 (12) (no pagination).

Lauenborg, J., Mathiesen, E., Ovesen, P., Westergaard, J.G., Ekbom, P., Mølsted-Pedersen, L., Damm, P., Lauenborg, J., Mathiesen, E., et al., 2003. Audit on stillbirths in women with pregestational type 1 diabetes. *Diabetes Care* 26:1385-89.

Lavin, C.G., Martinez, V.U., Garcia, R.Z., 2018. Precedents of induced abortion in women with post-abortion syndrome. [Spanish]. *Salud(i)Ciencia* 23:27-33.

Leggate, J., 2008. Improving pregnancy outcomes: mothers and substance misuse. *British Journal of Midwifery* 16:160-65.

Leppalahti, S., Gissler, M., Mentula, M., Heikinheimo, O., 2013. Is teenage pregnancy an obstetric risk in a welfare society? A population-based study in Finland, from 2006 to 2011. *BMJ Open* 3 (8) (no pagination).

Lerner-Geva, L., Glasser, S., Levitan, G., Boyko, V., Golan, A., Beloosesky, R., Lunenfeld, E., Many, A., Samueloff, A., et al., 2016. A case-control study of caesarean delivery on maternal request: who and why? *Journal of Maternal-Fetal & Neonatal Medicine* 29:2780-85.

Li, X., Sundquist, J., Sundquist, K., 2013. Immigrants and preterm births: a nationwide epidemiological study in Sweden. *Maternal and Child Health Journal* 17:1052-58.

Linard, M., Deneux-Tharaux, C., Luton, D., Schmitz, T., Mandelbrot, L., Estellat, C., Sauvegrain, P., Azria, E., Blondel, B., et al., 2019. Differential rates of cesarean delivery by maternal geographical origin: a cohort study in France. *BMC Pregnancy and Childbirth* 19 (1) (no pagination).

Linehan, L.A., Walsh, J., Morris, A., Kenny, L., O'Donoghue, K., Dempsey, E., Russell, N., 2016. Neonatal and maternal outcomes following midtrimester preterm premature rupture of the membranes: a retrospective cohort study. *BMC Pregnancy and Childbirth* 16:25.

Makenzius, M., Tyden, T., Darj, E., Larsson, M., 2011. Repeat induced abortion a matter of individual behaviour or societal factors? A cross-sectional study among Swedish women. *European Journal of Contraception and Reproductive Health Care* 16:369-77.

Männistö, J., Mentula, M., Bloigu, A., Hemminki, E., Gissler, M., Heikinheimo, O., Niinimäki, M., 2013. Medical versus surgical termination of pregnancy in primigravid women—is the next delivery differently at risk? A population-based register study. *BJOG* 120:331.

Mehler, K., Wendrich, D., Kissgen, R., Roth, B., Oberthuer, A., Pillekamp, F., Kribs, A., 2011. Mothers seeing their VLBW infants within 3 h after birth are more likely to establish a secure attachment behavior: evidence of a sensitive period with preterm infants? *Journal of Perinatology* 31:404-10.

Meltzer-Brody, S., Boschloo, L., Jones, I., Sullivan, P.F., Penninx, B.W., 2013. The EPDS-Lifetime: Assessment of lifetime prevalence and risk factors for perinatal depression in a large cohort of depressed women. *Archives of Women's Mental Health* 16:465-73.

Mendoza T, L.A., Arias G, M., Mendoza T, L.I., 2012. Children of adolescent mothers: Neonatal risks, morbidity and mortality. *Revista Chilena de Obstetricia y Ginecologia* 77:375-82.

Morales-Suarez-Varela, M., Kaerlev, L., Zhu, J.L., Llopis-Gonzalez, A., Gimeno-Clemente, N., Nohr, E.A., Bonde, J.P., Olsen, J., 2010. Risk of infection and adverse outcomes among pregnant working women in selected occupational groups: A study in the Danish National Birth Cohort. *Environmental Health: A Global Access Science Source* 9 (1) (no pagination).

Negro, R., Negro, F., 2000. Relationship between neonatal birthweight variation in respect to 50 degrees percentile and maternal education level in a high selected and homogeneous population. *Minerva pediatrica* 52:367-73.

Nguyen, R.H.N., Wilcox, A.J., Moen, B.E., McConaughy, D.R., Lie, R.T., 2007. Parent's occupation and isolated orofacial clefts in Norway: a population-based case-control study. *Annals of Epidemiology* 17:763-71.

Oberg, A.S., Frisell, T., Svensson, A.C., Iliadou, A.N., 2013. Maternal and Fetal Genetic Contributions to Postterm Birth: Familial Clustering in a Population-Based Sample of 475,429 Swedish Births. *American Journal of Epidemiology* 177:531-37.

Orvos, H., Hoffmann, I., Frank, I., Katona, M., Pal, A., Kovacs, L., 2002. The perinatal outcome of pregnancy without prenatal care. A retrospective study in Szeged, Hungary. *European Journal of Obstetrics, Gynecology, & Reproductive Biology* 100:171-3.

Orvos, H., Nyirati, I., Hajdu, J., Pal, A., Nyari, T., Kovacs, L., 1999. Is adolescent pregnancy associated with adverse perinatal outcome? *Journal of Perinatal Medicine* 27:199-203.

Panagopoulos, P., Tsoukalos, G., Economou, A., Zikopoulos, M., Koutras, I., Petrakos, G., Pachakis, M., 2005. Delivery and immigration: The experience of a Greek hospital. *Clinical and Experimental Obstetrics and Gynecology* 32:55-57.

Pastor Rodríguez, J.D., Roche, F.P., Sánchez Ortuño, M.M., Pastor Bravo, M.d.M., Barberá Ortega, M.d.C., Almansa Martínez, M.P., 2014. Consecuencias psicológicas en los padres de niños prematuros ingresados en una unidad de cuidados intensivos neonatal. *Evidentia* 11:09-Sep.

Patel, R.R., Steer, P., Doyle, P., Little, M.P., Elliott, P., 2004. Does gestation vary by ethnic group? A London-based study of over 122 000 pregnancies with spontaneous onset of labour. *International Journal of Epidemiology* 33:107-13.

Pereira, J., Pires, R., Araújo Pedrosa, A., Vicente, L., Bombas, T., Canavarro, M.C., 2017. Sociodemographic, sexual, reproductive and relationship characteristics of adolescents having an abortion in Portugal: a homogeneous or a heterogeneous group? *European Journal of Contraception & Reproductive Health Care* 22:53-61.

Pérez-Ramírez, F., García-García, I., Caparros-Gonzalez, R.A., Peralta-Ramírez, M.I., 2017. Psychological assessment among immigrant and Spanish women during the postpartum period in Spain. *Journal of Reproductive & Infant Psychology* 35:159-71.

Pérez, G., García-Subirats, I., Rodríguez-Sanz, M., Díez, E., Borrell, C., 2010. Trends in Inequalities in Induced Abortion According to Educational Level among Urban Women. *Journal of Urban Health* 87:524-30.

Perez, G., Ruiz-Munoz, D., Gotsens, M., Cases, M.C., Rodriguez-Sanz, M., 2014. Social and economic inequalities in induced abortion in Spain as a function of individual and contextual factors. *European Journal of Public Health* 24:162-69.

Persson, M., Shah, P.S., Rusconi, F., Reichman, B., Modi, N., Kusuda, S., Lehtonen, L., Håkansson, S., Yang, J., et al., 2018. Association of Maternal Diabetes With Neonatal Outcomes of Very Preterm and Very Low-Birth-Weight Infants: An International Cohort Study. *JAMA Pediatrics* 172:867-75.

Quansah, R., Gissler, M., Jaakkola, J.J.K., 2009. Work as a physician and adverse pregnancy outcomes: A Finnish nationwide population-based registry study. *European Journal of Epidemiology* 24:531-36.

Raisanen, S., Sankilampi, U., Gissler, M., Kramer, M.R., Hakulinen-Viitanen, T., Saari, J., Heinonen, S., 2014. Smoking cessation in the first trimester reduces most obstetric risks, but not the risks of major congenital anomalies and admission to neonatal care: A population-based cohort study of 1 164 953 singleton pregnancies in Finland. *Journal of Epidemiology and Community Health* 68:159-64.

Rasmussen, S., Irgens, L.M., Skjaerven, R., Melve, K.K., 2009. Prior adverse pregnancy outcome and the risk of stillbirth. *Obstetrics and Gynecology* 114:1259-70.

Reime, B., Janssen, P.A., Farris, L., Borde, T., Hellmers, C., Myezwa, H., Wenzlaff, P., 2012. Maternal near-miss among women with a migrant background in Germany. *Acta Obstetrica et Gynecologica Scandinavica* 91:824-29.

Restrepo-Mesa, S.L., Estrada-Restrepo, A., Gonzalez-Zapata, L.I., Agudelo-Suarez, A.A., Ronda-Perez, E., 2010. Factors related to birth weight: A comparison of related factors between newborns of Spanish and Colombian immigrant women in Spain. [Spanish]. *Archivos Latinoamericanos de Nutricion* 60:15-22.

Rodríguez Olalla, L., Muela Martínez, J.A., García León, A., Albin Rodríguez, R., 2004. Treatment compliance in pregnant women with gestational diabetes after an education program: relationship with anxiety and sociodemographic variables. *Enfermería Clínica* 14:318-27.

Rogozewski, M., Grudzien, J., Szusick, P., Krzak-Bienkowska, A., 2001. Analysis of stillbirths in Rybnik in the years 1991-2000. [Polish]. *Ginekologia Polska* 72:972-76.

Roman, H., Robillard, P., Verspyck, E., Hulsey, T.C., Marpeau, L., Barau, G., 2004. Obstetric and neonatal outcomes in grand multiparity. *Obstetrics & Gynecology* 103:1294-99.

Salakos, N., Koumoudis, A., Bakalianou, K., Paltoglou, G., Kalampokas, T., Iavazzo, C., 2010. Unwanted pregnancy and induced abortion among young women 16-22 years old in Greece: a retrospective study of the risk factors. *Clinical & Experimental Obstetrics & Gynecology* 37:303-9.

Santos, H.P., Bhattacharya, A., Martin, E.M., Addo, K., Psioda, M., Smeester, L., Joseph, R.M., Hooper, S.R., Frazier, J.A., et al., 2019. Epigenome-wide DNA methylation in placentas from preterm infants: association with maternal socioeconomic status. *Epigenetics* 14:751-65.

Scott, R.H., Bajos, N., Slaymaker, E., Wellings, K., Mercer, C.H., 2017. Understanding differences in conception and abortion rates among under-20 year olds in Britain and France: Examining the contribution of social disadvantage. *PLoS One* 12 (10) (no pagination).

Siedlecka, J., Makowiec-Dabrowska, T., 2000. Risk factors for preterm birth in a group of unemployed women. II. Analysis of independent variables. [Polish]. *Medycyna Pracy* 51:609-14.

Sletner, L., Nakstad, B., Yajnik, C.S., Morkrid, K., Vangen, S., Vardal, M.H., Holme, I.M., Birkeland, K.I., Jenum, A.K., 2013. Ethnic Differences in Neonatal Body Composition in a Multi-Ethnic Population and the Impact of Parental Factors: A Population-Based Cohort Study. *PLoS One* 8 (8) (no pagination).

Smillie, I., Yong, K., Harris, K., Wynne, D.M., Russell, C.J.H., 2015. Socioeconomic influence on orofacial cleft patient care. *Scottish Medical Journal* 60:70-74.

Soyal, S., Sarioz, A., Anik Ilhan, G., Kocagoz, A., Dizi, A., Gursoy, I., Celik, I., Ozmen, D., 2019. Evaluation of late adolescent pregnancies: Is late adolescence a risk factor for preterm labor? *Journal of Maternal-Fetal and Neonatal Medicine* 32:851-56.

Štípková, M., 2016. Immigrant disadvantage or the healthy immigrant effect? Evidence about low birth weight differences in the Czech Republic. *European Journal of Public Health* 26:662-66.

Stivanello, E., Rucci, P., Lenzi, J., Fantini, M.P., 2014. Determinants of cesarean delivery: a classification tree analysis. *BMC Pregnancy and Childbirth* 14:215.

Stokkeland, K., Ebrahim, F., Hultcrantz, R., Ekbo, A., Stephansson, O., 2013. Mothers with Alcoholic Liver Disease and the Risk for Preterm and Small-for-gestational-age Birth. *Alcohol and Alcoholism* 48:166-71.

Stone, N., Ingham, R., 2011. Who presents more than once? Repeat abortion among women in Britain. *Journal of Family Planning & Reproductive Health Care* 37:209-15.

Suciu, L.M., Pasc, A.L., Cucerea, M., Bell, E.F., 2016. Teenage Pregnancies: Risk Factors and Associated Neonatal Outcomes in an Eastern-European Academic Perinatal Care Center. *American Journal of Perinatology* 33:409-14.

Sydsjö, A., Brynhildsen, J., Selling, K.E., Josefsson, A., Sydsjö, G., 2006. Influence of rest during pregnancy on birth weight in working women. *Obstetrics & Gynecology* 107:991-96.

Sydsjo, G., Moller, L., Lilliecreutz, C., Bladh, M., Andolf, E., Josefsson, A., 2015. Psychiatric illness in women requesting caesarean section. *BJOG: An International Journal of Obstetrics and Gynaecology* 122:351-58.

Sze, K.Y.S., Bolaji, I., 2013. Evaluation of current termination of pregnancy and related services at Grimsby (UK) and recommendations for service improvement. *Journal of Reproduction and Contraception* 24:181-93.

Tararbit, K., Bui, T.T., Lelong, N., Thieulin, A.C., Goffinet, F., Khoshnood, B., 2013. Clinical and socioeconomic predictors of pregnancy termination for fetuses with congenital heart defects: a population-based evaluation. *Prenatal Diagnosis* 33:179-86.

Tsakiridu, D.O., Vidal, A.F., Valdes, F.V., Junquera Llaneza, M.L., Varela Uria, J.A., Cuesta Rodriguez, M., Lopez Sanchez, C., Busto Folgosa, M., Fernandez Ollero, M.J., 2008. Factors associated with induced abortion in women prostitutes in Asturias (Spain). *PLoS One* 3 (6) (no pagination).

Ullizzi, L., Zonta, L.A., 2002. Sex differential patterns in perinatal deaths in Italy. *Human Biology* 74:879-88.

Uphoff, E.P., Pickett, K.E., Wright, J., 2016. Social gradients in health for Pakistani and White British women and infants in two UK birth cohorts. *Ethnicity & Health* 21:452-67.

Vaisanen, H., Murphy, M., 2014. Social Inequalities in Teenage Fertility Outcomes: Childbearing and Abortion Trends of Three Birth Cohorts In Finland. *Perspectives on Sexual and Reproductive Health* 46:109-16.

Van Hanegem, N., Miltenburg, A.S., Zwart, J.J., Bloemenkamp, K.W.M., Van Roosmalen, J., 2011. Severe acute maternal morbidity in asylum seekers: A two-year nationwide cohort study in the Netherlands. *Acta Obstetrica et Gynecologica Scandinavica* 90:1010-16.

Vangen, S., Eskild, A., Forsen, L., 2008. Termination of pregnancy according to immigration status: A population-based registry linkage study. *BJOG: An International Journal of Obstetrics and Gynaecology* 115:1309-15.

Vatten, L.J., Skjaerven, R., 2003. Effect on pregnancy outcome of changing partner between first two births: prospective population study. *BMJ: British Medical Journal (International Edition)* 327:1138-41.

Verbeek, T., Bockting, C.L.H., Beijers, C., Meijer, J.L., van Pampus, M.G., Burger, H., 2019. Low socioeconomic status increases effects of negative life events on antenatal anxiety and depression. *Women & Birth* 32:e138-e43.

|                                                                           |                                                                                                                                                                                                                                                                                                                                                                                                                                                                                                                                                                                                                                                                                                                                                                                                                                                                                                                                                                                                                                                                                                                                                                                                                                                                                                                                                                                                                                                                                                                                                                                                                                                                                                                                                                                                                                                                                                                                                                                                                                                                                                                                                                                                                                                                                                                                                                                                                                                                                                                                                                                                                                                                                                                                                                                                                                                                                                                                                                                                                                                                                                                                                                                                                                                                                                                                                                                                                                                                                                                                                                                                                                                                                                                                                                                                                                                                                                                                                                                                                                                                                                                                                                                                                                                                                                                                                                                                                                                                                                                                                                                                                                                                                                                                                                                                                                                                                                                                                                                    |
|---------------------------------------------------------------------------|------------------------------------------------------------------------------------------------------------------------------------------------------------------------------------------------------------------------------------------------------------------------------------------------------------------------------------------------------------------------------------------------------------------------------------------------------------------------------------------------------------------------------------------------------------------------------------------------------------------------------------------------------------------------------------------------------------------------------------------------------------------------------------------------------------------------------------------------------------------------------------------------------------------------------------------------------------------------------------------------------------------------------------------------------------------------------------------------------------------------------------------------------------------------------------------------------------------------------------------------------------------------------------------------------------------------------------------------------------------------------------------------------------------------------------------------------------------------------------------------------------------------------------------------------------------------------------------------------------------------------------------------------------------------------------------------------------------------------------------------------------------------------------------------------------------------------------------------------------------------------------------------------------------------------------------------------------------------------------------------------------------------------------------------------------------------------------------------------------------------------------------------------------------------------------------------------------------------------------------------------------------------------------------------------------------------------------------------------------------------------------------------------------------------------------------------------------------------------------------------------------------------------------------------------------------------------------------------------------------------------------------------------------------------------------------------------------------------------------------------------------------------------------------------------------------------------------------------------------------------------------------------------------------------------------------------------------------------------------------------------------------------------------------------------------------------------------------------------------------------------------------------------------------------------------------------------------------------------------------------------------------------------------------------------------------------------------------------------------------------------------------------------------------------------------------------------------------------------------------------------------------------------------------------------------------------------------------------------------------------------------------------------------------------------------------------------------------------------------------------------------------------------------------------------------------------------------------------------------------------------------------------------------------------------------------------------------------------------------------------------------------------------------------------------------------------------------------------------------------------------------------------------------------------------------------------------------------------------------------------------------------------------------------------------------------------------------------------------------------------------------------------------------------------------------------------------------------------------------------------------------------------------------------------------------------------------------------------------------------------------------------------------------------------------------------------------------------------------------------------------------------------------------------------------------------------------------------------------------------------------------------------------------------------------------------------------------------------------------|
|                                                                           | <p>Villadsen, S.F., Mortensen, L.H., Andersen, A.M., 2009. Ethnic disparity in stillbirth and infant mortality in Denmark 1981-2003. <i>Journal of Epidemiology &amp; Community Health</i> 63:106-12.</p> <p>Villar, M., Santa-Marina, L., Murcia, M., Amiano, P., Gimeno, S., Ballester, F., Julvez, J., Romaguera, D., Fernández-Somoano, A., et al., 2018. Social Factors Associated with Non-initiation and Cessation of Predominant Breastfeeding in a Mother-Child Cohort in Spain. <i>Maternal &amp; Child Health Journal</i> 22:725-34.</p> <p>Voigt, M., Heineck, G., Hesse, V., 2004. The relationship between maternal characteristics, birth weight and pre-term delivery: Evidence from Germany at the end of the 20th century. <i>Economics and Human Biology</i> 2:265-80.</p> <p>Vollebregt, K.C., van der Wal, M.F., Wolf, H., Vrijkotte, T.G.M., Boer, K., Bonsel, G.J., 2008. Is psychosocial stress in first ongoing pregnancies associated with pre-eclampsia and gestational hypertension? <i>BJOG</i> 115:607.</p> <p>Vrijheid, M., Armstrong, B., Dolk, H., van Tongeren, M., Botting, B., 2003. Risk of hypospadias in relation to maternal occupational exposure to potential endocrine disrupting chemicals. <i>Occupational &amp; Environmental Medicine</i> 60:543-50.</p> <p>Wahlberg, A., Röst, M., Haglund, B., Högberg, U., Essén, B., 2013. Increased risk of severe maternal morbidity (near-miss) among immigrant women in Sweden: a population register-based study. <i>BJOG: An International Journal of Obstetrics &amp; Gynaecology</i> 120:1605-12.</p> <p>Walsh, J., Mahony, R., Armstrong, F., Ryan, G., O'Herlihy, C., Foley, M., 2011. Ethnic variation between white European women in labor outcomes in a setting in which the management of labor is standardized—a healthy migrant effect? <i>BJOG</i> 118:713.</p> <p>Wemaux-Denis, C., Garabedian, C., Huc, A., Cailleret, O., Depoortere, M.H., Hammou, Y., Subtil, D., 2017. Pregnancy and delivery of teenagers: Is the obstetrical prognosis worst between 13-15 years old? <i>Gynecologie Obstetrique Fertilité et Senologie</i> 45:05-Aug.</p> <p>Wikstrom, A.K., Stephansson, O., Cnattingius, S., 2010. Tobacco use during pregnancy and preeclampsia risk: effects of cigarette smoking and snuff. <i>Hypertension</i> 55:1254-9.</p> <p>Wilkinson, P., French, R., Kane, R., Lachowycz, K., Stephenson, J., Grundy, C., Jacklin, P., Kingori, P., Stevens, M., et al., 2006. Teenage conceptions, abortions, and births in England, 1994-2003, and the national teenage pregnancy strategy. <i>The Lancet</i> 368 North American Edition:1879-86.</p> <p>Wokoma, T.T., Jampala, M., Bexhell, H., Guthrie, K., Lindow, S., 2014. A comparative study of the prevalence of domestic violence in women requesting a termination of pregnancy and those attending the antenatal clinic. <i>BJOG: An International Journal of Obstetrics and Gynaecology</i> 121:627-33.</p> <p>Zwart, J.J., Jonkers, M.D., Richters, A., Öry, F., Bloemenkamp, K.W., Duvekot, J.J., van Roosmalen, J., 2011. Ethnic disparity in severe acute maternal morbidity: a nationwide cohort study in the Netherlands. <i>European Journal of Public Health</i> 21:229-34.</p>                                                                                                                                                                                                                                                                                                                                                                                                                                                                                                                                                                                                                                                                                                                                                                                                                                                                                                                                                                                                                                                                                                                                                                                                                                                                                                                                                                                                                                                                                                                                                                                                                                                                                                                   |
| <p>The paper details a study conducted in an excluded setting (n=279)</p> | <p>Abdollahi, F., Zarghami, M., Azhar, M.Z., Sazlina, S.G., Lye, M.S., 2014. Predictors and incidence of post-partum depression: A longitudinal cohort study. <i>Journal of Obstetrics and Gynaecology Research</i> 40:2191-200.</p> <p>Adhikari, K., McNeil, D.A., McDonald, S., Patel, A.B., Metcalfe, A., 2018. Differences in caesarean rates across women's socio-economic status by diverse obstetric indications: Cross-sectional study. <i>Paediatric and Perinatal Epidemiology</i> 32:309-17.</p> <p>Agha, M.M., Glazier, R.H., Moineddin, R., Moore, A.M., Guttmann, A., 2011. Socioeconomic status and prevalence of congenital heart defects: does universal access to health care system eliminate the gap? <i>Birth Defects Research</i> 91:1011-8.</p> <p>Ahmed, A., Feng, C., Bowen, A., Muhajarine, N., 2018. Latent trajectory groups of perinatal depressive and anxiety symptoms from pregnancy to early postpartum and their antenatal risk factors. <i>Archives of Women's Mental Health</i> 21:689-98.</p> <p>Ahn, S., 2000. Effects of maternal employment and infant's prematurity on postpartum health. <i>Case Western Reserve University</i>, pp. 222 p-22 p.</p> <p>Al-Zirql, I., Vangen, S., Forsen, L., Stray-Pedersen, B., 2008. Prevalence and risk factors of severe obstetric haemorrhage. <i>BJOG: An International Journal of Obstetrics &amp; Gynaecology</i> 115:1265-72.</p> <p>Al Mamun, A., Mannan, M., O'Callaghan, M.J., Williams, G.M., Najman, J.M., Callaway, L.K., 2013. Association between gestational weight gain and postpartum diabetes: evidence from a community based large cohort study. <i>PLoS one</i> 8:e75679.</p> <p>Albouy-Llaty, M., Limousi, F., Carles, C., Dupuis, A., Rabouan, S., Migeot, V., 2016. Association between exposure to endocrine disruptors in drinking water and preterm birth, taking neighborhood deprivation into account: A historic cohort study. <i>International Journal of Environmental Research and Public Health</i> 13 (8) (no pagination).</p> <p>Albuquerque Queiroz, P.M., Menezes De Souza, N.N., Pessoa De Araújo Burgos, M.G., 2016. Nutritional profile and associated factors in women with gestational diabetes. <i>Nutricion Clinica y Dietetica Hospitalaria</i> 36:96-102.</p> <p>Alderman, H., Headley, D., 2018. The timing of growth faltering has important implications for observational analyses of the underlying determinants of nutrition outcomes. <i>PLoS One</i> 13 (4) (no pagination).</p> <p>Alford, S.M.H., Lappin, R.E., Peterson, L., Johnson, C.C., 2009. Pregnancy associated smoking behavior and six year postpartum recall. <i>Maternal &amp; Child Health Journal</i> 13:865-72.</p> <p>Alhusen, J.L., Bullock, L., Sharps, P., Schminkey, D., Comstock, E., Campbell, J., 2014. Intimate Partner Violence During Pregnancy and Adverse Neonatal Outcomes in Low-Income Women. <i>Journal of Women's Health</i> 23:920-26.</p> <p>Altenhöner, T., Köhler, M., Philippi, M., 2016. The Relevance of Maternal Socioeconomic Characteristics for Low Birth Weight - A Case-Control Study. <i>Geburtshilfe und Frauenheilkunde</i> 76:248-54.</p> <p>Alvarenga, P., Bitencourt Frizzo, G., 2017. Stressful Life Events and Women's Mental Health During Pregnancy and Postpartum Period. <i>Paideia (0103863X)</i> 27:51-59.</p> <p>Alves, E., Azevedo, A., Rodrigues, T., Santos, A.C., Barros, H., 2013. Impact of risk factors on hypertensive disorders in pregnancy, in primiparae and multiparae. <i>Annals of Human Biology</i> 40:377-84.</p> <p>Aminian, O., Sharifian, S.A.A., Izadi, N., Sadeghniai, K., Rashedi, A., 2014. Association between maternal work activity on birth weight and gestational age. <i>Asian Pacific Journal of Reproduction</i> 3:200-03.</p> <p>Ancel, P., Suarel-Cubizolles, M., Di Renzo, G.C., Papiernik, E., Bréart, G., 1999. Social differences of very preterm birth in Europe: interaction with obstetric history. <i>American Journal of Epidemiology</i> 149:908-15.</p> <p>Ancel, P.Y., Bréart, G., 2000. Epidemiology and risk factors in preterm deliveries. <i>Gynakologie</i> 33:356-60.</p> <p>Ancel, P.Y., Suarel-Cubizolles, M.J., Carlo Di Renzo, G., Papiernik, E., Bréart, G., page, A.c.l.o.m.o.t.E.G.m.b.f.o., 1999. Very and moderate preterm births: are the risk factors different? <i>BJOG: An International Journal of Obstetrics &amp; Gynaecology</i> 106:1162-70.</p> <p>Anderson, J.G., Rogers, E.E., Baer, R.J., Olman, S.P., Paynter, R., Partridge, J.C., Rand, L., Jelliffe-Pawłowski, L.L., Steurer, M.A., 2018. Racial and ethnic disparities in preterm infant mortality and severe morbidity: a population-based study. <i>Neonatology</i> 113:44-54.</p> <p>Andrejevic, A., Cvetkovic, S., Vitosevic, Z., Andrejevic, L., Relic, G., 2011. Multiparity, perinatal morbidity and mortality. <i>Clinical and Experimental Obstetrics and Gynecology</i> 38:71-75.</p> |

Arama, V., Vladareanu, R., Mihailescu, R., Streinu Cercel, A., Mihai, C., Hristea, A., Iosipenco, M., Arama, S.S., Rabilloud, M., 2008. Seroprevalence and risk factors associated with herpes simplex virus infection among pregnant women. *Journal of Perinatal Medicine* 36:206-12.

Aras, N., Oral, E., Aydin, N., Gulec, M., 2013. Maternal age and number of children are risk factors for depressive disorders in non-perinatal women of reproductive age. *International Journal of Psychiatry in Clinical Practice* 17:298-306.

Arizo-Luque, V., Garcia, A.M., Estarlich, M., Ballester, F., Fernandez-Tardon, G., Tardon, A., Guxens, M., Vrijheid, M., Lertxundi, A., et al., 2018. [Effect of employment and domestic load on fetal development and length of gestation in a birth cohort study]. *Revista Espanola de Salud Publica* 92:17.

Astolfi, P., De Pasquale, A., Zonta, L.A., 2004. Late paternity and stillbirth risk. *Human Reproduction* 19:2497-501.

Astolfi, P., Zonta, L.A., 2002. Delayed maternity and risk at delivery. *Paediatric and Perinatal Epidemiology* 16:67-72.

Attanasio, L., Kozhimannil, K.B., McGovern, P., Gjerdingen, D., Johnson, P.J., 2013. The Impact of Prenatal Employment on Breastfeeding Intentions and Breastfeeding Status at 1 Week Postpartum. *Journal of Human Lactation* 29:620-28.

Auger, N., Abrahamowicz, M., Park, A.L., Wynant, W., 2013. Extreme maternal education and preterm birth: time-to-event analysis of age and nativity-dependent risks. *Annals of Epidemiology* 23:1-6.

Auger, N., Luo, Z., Platt, R., Daniel, M., 2008. Do mother's education and foreign born status interact to influence birth outcomes? Clarifying the epidemiological paradox and the healthy migrant effect. *Journal of Epidemiology & Community Health* 62:402-09.

Avelino, M.M., Campos, D., Jr., do Carmo Barbosa de Parada, J., de Castro, A.M., Medical School of the Federal University of G., Institute of Tropical, P., Public Health of the Federal University of, G., National Foundation of Support to, R., State Secretary of Health of, G., et al., 2003. Pregnancy as a risk factor for acute toxoplasmosis seroconversion. *European Journal of Obstetrics, Gynecology, & Reproductive Biology* 108:19-24.

Baba, S., Wikstrom, A.K., Stephansson, O., Cnattingius, S., 2014. Influence of snuff and smoking habits in early pregnancy on risks for stillbirth and early neonatal mortality. *Nicotine and Tobacco Research* 16:78-83.

Baba, S., Wikström, A.K., Stephansson, O., Cnattingius, S., 2013. Changes in snuff and smoking habits in Swedish pregnant women and risk for small for gestational age births. *BJOG: An International Journal of Obstetrics & Gynaecology* 120:456-62.

Bai, Y., Middlestadt, S.E., Peng, C., Fly, A.D., 2010. Predictors of continuation of exclusive breastfeeding for the first six months of life. *Journal of Human Lactation* 26:26-75.

Bailit, J.L., Landon, M.B., Thom, E., Rouse, D.J., Spong, C.Y., Varner, M.W., Moawad, A.H., Caritis, S.N., Harper, M., et al., 2006. The MFMU Cesarean Registry: impact of time of day on cesarean complications. *American Journal of Obstetrics & Gynecology* 195:1132-37.

Barros, A.J.D., Ronsmans, C., Axelson, H., Loaiza, E., Bertoldi, A.D., França, G.V.A., Bryce, J., Boerma, J.T., Victora, C.G., 2012. Equity in maternal, newborn, and child health interventions in Countdown to 2015: a retrospective review of survey data from 54 countries. *The Lancet* 379:1225-33.

Bartick, M., Tomori, C., 2019. Sudden infant death and social justice: A syndemics approach. *Maternal & Child Nutrition* 15:N.PAG-N.PAG.

Beeckman, K., Van De Putte, S., Putman, K., Louckx, F., 2009. Predictive social factors in relation to preterm birth in a metropolitan region. *Acta Obstetrica et Gynecologica Scandinavica* 88:787-92.

Bell, J.F., Zimmerman, F.J., Diehr, P.K., 2008. Maternal work and birth outcome disparities. *Maternal and Child Health Journal* 12:415-26.

Benoit, C., Westfall, R., Treloar, A.E.B., Phillips, R., Jansson, S.M., 2007. Social factors linked to postpartum depression: A mixed-methods longitudinal study. *Journal of Mental Health* 16:719.

Berg, G., Eijdsen, M., Vrijkotte, T., Gemke, R., 2013. Suboptimal maternal vitamin D status and low education level as determinants of small-for-gestational-age birth weight. *European Journal of Nutrition* 52:273-79.

Bertin, M., Chevrier, C., Serrano, T., Monfort, C., Rouget, F., Cordier, S., Viel, J.F., 2015a. Association between prenatal exposure to traffic-related air pollution and preterm birth in the PELAGIE mother-child cohort, Brittany, France. Does the urban-rural context matter? *Environmental Research* 142:17-24.

Bertin, M., Viel, J.F., Monfort, C., Cordier, S., Chevrier, C., 2015b. Socioeconomic Disparities in Adverse Birth Outcomes in Urban and Rural Contexts: A French Mother-Child Cohort. *Paediatric and Perinatal Epidemiology* 29:426-35.

Bicalho, G.G., Barros Filho Ade, A., 2002. [Birthweight and caffeine consumption]. *Revista de Saude Publica* 36:180-7.

Bienertova-Vasku, J., Zlamal, F., Prusa, T., Novak, J., Mikes, O., Cupr, P., Pohorala, A., Svancara, J., Andryskova, L., et al., 2017. Parental heights and maternal education as predictors of length/height of children at birth, age 3 and 19 years, independently on diet: the ELSPEC study. *European Journal of Clinical Nutrition* 71:1193-99.

Bilsteen, J.F., Andresen, J.B., Mortensen, L.H., Hansen, A.V., Andersen, A.M.N., 2018. Educational disparities in perinatal health in Denmark in the first decade of the 21st century: A register-based cohort study. *BMJ Open* 8 (11) (no pagination).

Bittencourt Leite de Carvalho, J., Alves Teixeira, G., Cândido de Moraes, P., Vasconcelos de Sena, A., de Moraes Alves, T.R., 2018. Socioeconomic conditions of the gestation of preterm infants. *Journal of Nursing UFPE / Revista de Enfermagem UFPE* 12:386-90.

Bloch, J.R., Webb, D.A., Mathews, L., Dennis, E.F., Bennett, I.M., Culhane, J.F., 2010. Beyond marital status: the quality of the mother-father relationship and its influence on reproductive health behaviors and outcomes among unmarried low income pregnant women. *Maternal and Child Health Journal* 14:726-34.

Blondel, B., Marshall, B., 1998. Poor antenatal care in 20 French districts: risk factors and pregnancy outcome. *Journal of Epidemiology & Community Health* 52:501-06.

Bodin, L., Axelsson, G., Ahlberg Jr, G., 1999. The association of shift work and nitrous oxide exposure in pregnancy with birth weight and gestational age. *Epidemiology*:429-36.

Boggess, K.A., Berggren, E.K., Koskenoja, V., Urlaub, D., Lorenz, C., Boggess, K.A., Berggren, E.K., Koskenoja, V., Urlaub, D., et al., 2013. Severe preeclampsia and maternal self-report of oral health, hygiene, and dental care. *Journal of Periodontology* 84:143-51.

Bouckaert, A., 2000. Smoking during pregnancy: foetal growth retardation and other risks for the newborn. *Statistics in Medicine* 19:239-54.

Bouthoorn, S.H., Silva, L.M., Murray, S.E., Steegers, E.A.P., Jaddoe, V.W.V., Moll, H., Hofman, A., Mackenbach, J.P., Raat, H., 2015. Low-educated women have an increased risk of gestational diabetes mellitus: the Generation R Study. *Acta Diabetologica* 52:445-52.

Bryant, A.S., Worjloh, A., Caughey, A.B., Washington, A.E., 2010. Racial/ethnic disparities in obstetric outcomes and care: prevalence and determinants. *American Journal of Obstetrics and Gynecology* 202:335-43.

Bryant, J., Waller, A., Cameron, E., Hure, A., Sanson-Fisher, R., 2017. Diet during pregnancy: Women's knowledge of and adherence to food safety guidelines. *Australian & New Zealand Journal of Obstetrics & Gynaecology* 57:315-22.

Bublitz, M.H., Vergara-Lopez, C., O'Reilly Treter, M., Stroud, L.R., 2016. Association of Lower Socioeconomic Position in Pregnancy with Lower Diurnal Cortisol Production and Lower Birthweight in Male Infants. *Clinical Therapeutics* 38:265-74.

Butwick, A.J., Ramachandran, B., Hegde, P., Riley, E.T., El-Sayed, Y.Y., Nelson, L.M., 2017. Risk factors for severe postpartum hemorrhage after cesarean delivery: case-control studies. *Anesthesia and Analgesia* 125:523.

Caetano Lira, J.A., Bezerra Cunha, K.J., Francisco Ribeiro, J., 2017. LOW WEIGHT AT BIRTH WITH A FOCUS ON MATERNAL DETERMINANTS. *Journal of Nursing UFPE / Revista de Enfermagem UFPE* 11:3732-40.

Cammu, H., Martens, G., Keirse, M., 2011. Mothers' level of education and childbirth interventions in a population-based study in Flanders, Northern Belgium. *Birth* 38:191-99.

Cammu, H., Martens, G., Van Maele, G., Amy, J.J., 2010. The higher the educational level of the first-time mother, the lower the fetal and post-neonatal but not the neonatal mortality in Belgium (Flanders). *European Journal of Obstetrics and Gynecology and Reproductive Biology* 148:13-16.

Canakci, V., Canakci, C.F., Yildirim, A., Ingec, M., Eltas, A., Erturk, A., 2007. Periodontal disease increases the risk of severe pre-eclampsia among pregnant women. *Journal of Clinical Periodontology* 34:639-45.

Cantarutti, A., Franchi, M., Compagnoni, M.M., Merlino, L., Corrao, G., Monzio Compagnoni, M., 2017. Mother's education and the risk of several neonatal outcomes: an evidence from an Italian population-based study. *BMC Pregnancy & Childbirth* 17:1-10.

Capasso, F., Voza, I., Capuccio, V., Vestri, A.R., Polimeni, A., Ottolenghi, L., 2016. Correlation among periodontal health status, maternal age and pre-term low birth weight. *American Journal of Dentistry* 29:197-200.

Carlsen, F., Grytten, J., Eskild, A., 2014. Maternal education and risk of offspring death; changing patterns from 16 weeks of gestation until one year after birth. *European Journal of Public Health* 24:157-62.

Carmichael, S.L., Ma, C., Tinker, S., Rasmussen, S.A., Shaw, G.M., 2014. Maternal stressors and social support as risks for delivering babies with structural birth defects. *Paediatric & Perinatal Epidemiology* 28:338-44.

Caserta, D., Ralli, E., Matteucci, E., Bordi, G., Soave, I., Marci, R., Moscarini, F., 2015. The Influence of Socio-Demographic Factors on Miscarriage Incidence Among Italian and Immigrant Women: A Critical Analysis from Italy. *Journal of Immigrant & Minority Health* 17:843-51.

Cernadas, J.M.C., Noceda, G., Barrera, L., Martinez, A.M., Garsd, A., 2003. Maternal and perinatal factors influencing the duration of exclusive breastfeeding during the first 6 months of life. *Journal of Human Lactation* 19:136-44.

Cesaroni, G., Forastiere, F., Perucci, C.A., 2008. Are Cesarean Deliveries More Likely for Poorly Educated Parents? A Brief Report from Italy. *Birth: Issues in Perinatal Care* 35:241-44.

Chappell, L.C., Seed, P.T., Myers, J., Taylor, R.S., Kenny, L.C., Dekker, G.A., Walker, J.J., McCowan, L.M.E., North, R.A., et al., 2013. Exploration and confirmation of factors associated with uncomplicated pregnancy in nulliparous women: prospective cohort study. *BMJ : British Medical Journal (Online)* 347:n.

Chen, H.M., Chen, S.F., Chen, Y.H., Lin, H.C., 2010. Increased risk of adverse pregnancy outcomes for women with migraines: A nationwide population-based study. *Cephalalgia* 30:433-38.

Chiavarini, M., Bartolucci, F., Gili, A., Pieroni, L., Minelli, L., Chiavarini, M., Bartolucci, F., Gili, A., Pieroni, L., et al., 2012. Effects of individual and social factors on preterm birth and low birth weight: empirical evidence from regional data in Italy. *International Journal of Public Health* 57:261-68.

Chiavarini, M., Minelli, L., 2015. Maternal and Perinatal Health in Umbria region in 2012. *Annali di Igiene : medicina preventiva e di comunita* 27:580-89.

Chotnopparatpattara, P., Limpongsanurak, S., Charnngam, P., 2003. The Prevalence and Risk Factors of Anemia in Pregnant Women. *Journal of the Medical Association of Thailand* 86:1001-07.

Claridge, A.M., Chaviano, C.L., 2013. Consideration of Abortion in Pregnancy: Demographic Characteristics, Mental Health, and Protective Factors. *Women & Health* 53:777-94.

Claussen, B., Smith, G.D., Thelle, D., 2003. Impact of childhood and adulthood socioeconomic position on cause specific mortality: the Oslo Mortality Study. *Journal of Epidemiology & Community Health* 57:40-45.

Cnattingius, S., 2004. The epidemiology of smoking during pregnancy: smoking prevalence, maternal characteristics, and pregnancy outcomes. *Nicotine & Tobacco Research* 6:S125-S40.

Cnattingius, S., Villamor, E., Johansson, S., Edstedt Bonamy, A.K., Persson, M., Wikstrom, A.K., Granath, F., 2013. Maternal obesity and risk of preterm delivery. *JAMA - Journal of the American Medical Association* 309:2362-70.

Correia, S., Barros, H., 2015. Small-for-gestational age Portuguese babies: The effect of childhood social environment, growth and adult socioeconomic conditions. *Preventive Medicine* 70:102-07.

Corwin, E.J., Guo, Y., Pajer, K., Lowe, N., McCarthy, D., Schmiede, S., Weber, M., Pace, T., Stafford, B., 2013. Immune dysregulation and glucocorticoid resistance in minority and low income pregnant women. *Psychoneuroendocrinology* 38:1786-96.

Currie, J., 2011. Inequality at birth: Some causes and consequences. *American Economic Review* 101:1-22.

Dadvand, P., Figueras, F., Basagana, X., Beelen, R., Martinez, D., Cirach, M., Schembari, A., Hoek, G., Brunekreef, B., et al., 2013. Ambient air pollution and preeclampsia: a spatiotemporal analysis. *Environmental Health Perspectives* 121:1365-71.

Dai, L., Hu, W., Luo, X., Shen, Y., 2014. [Interaction of prenatal care and level of maternal education on the risk of neonatal low birth weight]. *Chung-Hua Liu Hsing Ping Hsueh Tsa Chih Chinese Journal of Epidemiology* 35:533-6.

David, M., Borde, T., Brenne, S., Ramsauer, B., Henrich, W., Breckenkamp, J., Razum, O., 2017. Obstetric and perinatal outcomes among immigrant and non-immigrant women in Berlin, Germany. *Archives of Gynecology & Obstetrics* 296:745-62.

de Miranda, M.J., Costa, C., Santana, P., Barrozo, L.V., 2014. Spatial association between socioeconomic variables and risk related to pre-term births in metropolitan region of Sao Paulo (MRSP) and Lisbon metropolitan area (AML). *Saude e Sociedade* 23:1142-53.

Dede, F.S., Ulucay, U., Kose, M.F., Dede, H., Dilbaz, S., 2010. Fetal loss in threatened abortion after demonstration of fetal cardiac activity in a low socioeconomic population. *Journal of Obstetrics & Gynaecology* 30:622-5.

Dejin-Karlsson, E., Hanson, B.S., Ostergren, P.O., Lindgren, A., Sjoberg, N.O., Marsal, K., 2000. Association of a lack of psychosocial resources and the risk of giving birth to small for gestational age infants: a stress hypothesis. *BJOG: An International Journal of Obstetrics & Gynaecology* 107:89-100.

Delnord, M., Blondel, B., Prunet, C., Zeitlin, J., 2018. Are risk factors for preterm and early-term live singleton birth the same? A population-based study in France. *BMJ Open* 8 (1) (no pagination).

Demircan, N., Ozmen, U., Kokturk, F., Kucuk, H., Ata, S., Harma, M., Arkan, I.I., 2016. What are the probable predictors of urinary incontinence during pregnancy? *PeerJ* 2016 (7) (no pagination).

Demirci, O., Selcuk, S., Kumru, P., Asoğlu, M.R., Mahmutoglu, D., Boza, B., Turkyilmaz, G., Butün, Z., Arisoy, R., et al., 2015. Maternal and fetal risk factors affecting perinatal mortality in early and late fetal growth restriction. *Taiwanese Journal of Obstetrics and Gynecology* 54:700-04.

Department of Health and Children, 1993. Perinatal statistics 1993. Department of Health and Children, Dublin.

Deputy, N.P., Sharma, A.J., Kim, S.Y., Hinkle, S.N., 2015. Prevalence and characteristics associated with gestational weight gain adequacy. *Obstetrics & Gynecology* 125:773-81.

Desrosiers, T.A., Lawson, C.C., Meyer, R.E., Richardson, D.B., Daniels, J.L., Waters, M.A., Van Wijngaarden, E., Langlois, P.H., Romitti, P.A., et al., 2012. Maternal occupational exposure to organic solvents during early pregnancy and risks of neural tube defects and orofacial clefts. *Occupational and Environmental Medicine* 69:493-99.

Devlieger, H., Martens, G., Bekaert, A., 2005. Social inequalities in perinatal and infant mortality in the northern region of Belgium (the Flanders). *European Journal of Public Health* 15:15-19.

Di Renzo, G.C., Giardina, I., Rosati, A., Clerici, G., Torricelli, M., Petraglia, F., Italian Preterm Network Study, G., 2011. Maternal risk factors for preterm birth: a country-based population analysis. *European Journal of Obstetrics, Gynecology, & Reproductive Biology* 159:342-6.

Dickute, J., Padaiga, Z., Grabauskas, V., Gaizauskiene, A., Basys, V., Obelenis, V., 2002. Do maternal social factors, health behavior and work conditions during pregnancy increase the risk of low birth weight in Lithuania?. [Lithuanian]. *Medicina (Kaunas, Lithuania)* 38:321-32.

Dolatian, M., Mirabzadeh, A., Setareh Forouzan, A., Sajjadi, H., Alavimajd, H., Mahmoodi, Z., Moafi, F., 2014. Relationship between Structural and Intermediary Determinants of Health and Preterm Delivery. *Journal of Reproduction & Infertility* 15:78-86.

Dummer, T.J.B., Pearce, M.S., Dickinson, H.O., Charlton, M.E., Salotti, J., Parker, L., 1999. Stillbirths in relation to the coastline of Cumbria, 1950-89. *Paediatric and Perinatal Epidemiology* 13:131-37.

Duque, P.A., Valencia Rico, C.L., Araujo, J.J., 2018. Socio-demographic and preconception risk factors in parents of children suffering from congenital cardiopathy. *Enfermeria Clinica* 28:300-08.

Egbe, A., Uppu, S., Lee, S., Ho, D., Srivastava, S., 2014. Changing Prevalence of Severe Congenital Heart Disease: A Population-Based Study. *Pediatric Cardiology* 35:1232-38.

Ekeus, C., Cnattingius, S., Essen, B., Hjern, A., 2011. Stillbirth among foreign-born women in Sweden. *European Journal of Public Health* 21:788-92.

Ekwo, E.E., Moawad, A., 2000. Maternal age and preterm births in a black population. *Paediatric and Perinatal Epidemiology* 14:145-51.

El-Sayed, A.M., Galea, S., 2012. Temporal Changes in Socioeconomic Influences on Health: Maternal Education and Preterm Birth. *American Journal of Public Health* 102:1715-21.

Emond, J.A., Karagas, M.R., Baker, E.R., Gilbert-Diamond, D., 2018. Better diet quality during pregnancy is associated with a reduced likelihood of an infant born small for gestational age: An analysis of the prospective New Hampshire birth cohort study. *Journal of Nutrition* 148:22-30.

Escartin, L., Samper, M.P., Santabarbara, J., Labayen, I., Alvarez, M.L., Ayerza, A., Oves, B., Moreno, L.A., Rodriguez, G., 2014. Determinants of birth size in Northeast Spain. *Journal of Maternal-Fetal and Neonatal Medicine* 27:677-82.

Faisal-Cury, A., Menezes, P.R., Quayle, J., Santiago, K., Matijasevich, A., 2017. The relationship between indicators of socioeconomic status and cesarean section in public hospitals. *Revista de Saude Publica* 51:14.

Feldman, P.J., Dunkel-Schetter, C., Sandman, C.A., Wadhwa, P.D., 2000. Maternal social support predicts birth weight and fetal growth in human pregnancy. *Psychosomatic Medicine* 62:715-25.

Ferrari, R.A.P., Bertolozzi, M.R., 2012. Maternal age and characteristics of infants who died at the neonatal period, 2000 to 2009. *Ciencia, Cuidado e Saude* 11:16-22.

Field, T., Hernandez-Reif, M., Diego, M., 2006. Risk factors and stress variables that differentiate depressed from nondepressed pregnant women. *Infant Behavior and Development* 29:169-74.

Figueiredo, R., Figueiredo, N., Feguri, A., Bieski, I., Mello, R., Espinosa, M., Damazo, A., 2015. The role of the folic acid to the prevention of orofacial cleft: an epidemiological study. *Oral Diseases* 21:240-47.

Finch, B.K., 2003. Socioeconomic gradients and low birth-weight: empirical and policy considerations. *Health Services Research* 38:1819-42.

Firdaus, U., Manazir Ali, S., Sachdeva, S., 2013. Meconium stained amniotic fluid: A clinical study of maternal and neonatal attributes. *Current Pediatric Research* 17:37-40.

Firmin, M., Carles, G., Mence, B., Madhusudan, N., Faurous, E., Jolivet, A., 2019. Postpartum hemorrhage: incidence, risk factors, and causes in Western French Guiana. *Journal of Gynecology Obstetrics and Human Reproduction* 48:55-60.

Flacking, R., Nyqvist, K.H., Ewald, U., 2007. Effects of socioeconomic status on breastfeeding duration in mothers of preterm and term infants. *European Journal of Public Health* 17:579-84.

Florescu, L., Temneanu, O.R., Mindru, D.E., 2015. The socioeconomic status – A risk factor for the low birth weight. *Revista de Cercetare si Interventie Sociala* 49:98-112.

Fonseca, V.R., Silva, G.A., Otta, E., 2010. [The relationship between postpartum depression and maternal emotional availability]. *Cadernos de Saude Publica* 26:738-46.

Font-Ribera, L., Pérez, G., Salvador, J., Borrell, C., 2008. Socioeconomic inequalities in unintended pregnancy and abortion decision. *Journal of Urban Health* 85:125-35.

Ford, J.H., 2011. Preconception risk factors and SGA babies: Papilloma virus, omega 3 and fat soluble vitamin deficiencies. *Early Human Development* 87:785-9.

Foster, D.G., Kimpfort, K., 2013. Who seeks abortions at or after 20 weeks? Perspectives on Sexual & Reproductive Health 45:210-8.

Fransson, E.M., Örténstrand, A.R.N.P., Hjelmstedt, A.R.N.R.M.P., 2011. Antenatal Depressive Symptoms and Preterm Birth: A Prospective Study of a Swedish National Sample. *Birth* 38:10.

Gareen, I.F., Morgenstern, H., Greenland, S., Gifford, D.S., 2003. Explaining the association of maternal age with Cesarean delivery for nulliparous and parous women. *Journal of Clinical Epidemiology* 56:1100-10.

Gawade, P.L., Oeffinger, K.C., Sklar, C.A., Green, D.M., Krull, K.R., Chemaitilly, W., Stovall, M., Leisenring, W., Armstrong, G.T., et al., 2015. Lifestyle, distress, and pregnancy outcomes in the Childhood Cancer Survivor Study cohort. *American Journal of Obstetrics and Gynecology* 212:47e1-47e10.

Gaysina, D., Fergusson, D.M., Leve, L.D., Horwood, J., Reiss, D., Shaw, D.S., Elam, K.K., Natsuaki, M.N., Neiderhiser, J.M., et al., 2013. Maternal smoking during pregnancy and offspring conduct problems: evidence from 3 independent genetically sensitive research designs. *JAMA Psychiatry* 70:956-63.

Genereux, M., Auger, N., Goneau, M., Daniel, M., 2008. Neighbourhood socioeconomic status, maternal education and adverse birth outcomes among mothers living near highways. *Journal of Epidemiology & Community Health* 62:695-700.

Genowska, A., Fryc, J., Szpak, A., Tysko, P., 2019. Is socio-economic status associated with adverse birth outcomes in Poland? *Annals of agricultural and environmental medicine* : AAEM 26:369-74.

Ghaemmaghami, S.J., Nikniaz, L., Mahdavi, R., Nikniaz, Z., Razmifard, F., Afsharnia, F., 2013. Effects of infants' birth order, maternal age, and socio- economic status on birth weight. *Saudi Medical Journal* 34:949-53.

Gissler, M., Meriläinen, J., Vuori, E., Hemminki, E., 2003. Register based monitoring shows decreasing socioeconomic differences in Finnish perinatal health. *Journal of Epidemiology & Community Health* 57:433-39.

Gissler, M., Rahkonen, O., Arntzen, A., Cnattingius, S., Nybo Andersen, A., Hemminki, E., 2009. Trends in socioeconomic differences in Finnish perinatal health 1991-2006. *Journal of Epidemiology & Community Health* 63:420-25.

|  |                                                                                                                                                                                                                                                                                                                                                                                                                                                                                                                                                                                                                                                                                                                                                                                                                                                                                                                                                                                                                                                                                                                                                                                                                                                                                                                                                                                                                                                                                                                                                                                                                                                                                                                                                                                                                                                                                                                                                                                                                                                                                                                                                                                                                                                                                                                                                                                                                                                                                                                                                                                                                                                                                                                                                                                                                                                                                                                                                                                                                                                                                                                                                                                                                                                                                                                                                                                                                                                                                                                                                                                                                                                                                                                                                                                                                                                                                                                                                                                                                                                                                                                                                                                                                                                                                                                                                                                                                                                                                                                                                                                                                                                                                                                                                                                                                                                                                                                                                                                                                                                                                                                                                                                                                                                                                                                                                                                                                                                                                                                                                                                                                                                                                                                                                                                                                                                                                                                                                                                                                                                                                                                                                                                                                                                                                                                                                                                                                                                                                                                                                                                                                                                                                                                                                                                                                                                                                                                                                                                                                                                                                                                                                                                                                                                                                                                                                                                                                                                                                                                                                                                                                                                                                                                                                                                                                                                                                                                                                                                                                                                                                                                                                                                                                                                                                                                                                                                                                                                                                                                                                                                                                                                          |
|--|----------------------------------------------------------------------------------------------------------------------------------------------------------------------------------------------------------------------------------------------------------------------------------------------------------------------------------------------------------------------------------------------------------------------------------------------------------------------------------------------------------------------------------------------------------------------------------------------------------------------------------------------------------------------------------------------------------------------------------------------------------------------------------------------------------------------------------------------------------------------------------------------------------------------------------------------------------------------------------------------------------------------------------------------------------------------------------------------------------------------------------------------------------------------------------------------------------------------------------------------------------------------------------------------------------------------------------------------------------------------------------------------------------------------------------------------------------------------------------------------------------------------------------------------------------------------------------------------------------------------------------------------------------------------------------------------------------------------------------------------------------------------------------------------------------------------------------------------------------------------------------------------------------------------------------------------------------------------------------------------------------------------------------------------------------------------------------------------------------------------------------------------------------------------------------------------------------------------------------------------------------------------------------------------------------------------------------------------------------------------------------------------------------------------------------------------------------------------------------------------------------------------------------------------------------------------------------------------------------------------------------------------------------------------------------------------------------------------------------------------------------------------------------------------------------------------------------------------------------------------------------------------------------------------------------------------------------------------------------------------------------------------------------------------------------------------------------------------------------------------------------------------------------------------------------------------------------------------------------------------------------------------------------------------------------------------------------------------------------------------------------------------------------------------------------------------------------------------------------------------------------------------------------------------------------------------------------------------------------------------------------------------------------------------------------------------------------------------------------------------------------------------------------------------------------------------------------------------------------------------------------------------------------------------------------------------------------------------------------------------------------------------------------------------------------------------------------------------------------------------------------------------------------------------------------------------------------------------------------------------------------------------------------------------------------------------------------------------------------------------------------------------------------------------------------------------------------------------------------------------------------------------------------------------------------------------------------------------------------------------------------------------------------------------------------------------------------------------------------------------------------------------------------------------------------------------------------------------------------------------------------------------------------------------------------------------------------------------------------------------------------------------------------------------------------------------------------------------------------------------------------------------------------------------------------------------------------------------------------------------------------------------------------------------------------------------------------------------------------------------------------------------------------------------------------------------------------------------------------------------------------------------------------------------------------------------------------------------------------------------------------------------------------------------------------------------------------------------------------------------------------------------------------------------------------------------------------------------------------------------------------------------------------------------------------------------------------------------------------------------------------------------------------------------------------------------------------------------------------------------------------------------------------------------------------------------------------------------------------------------------------------------------------------------------------------------------------------------------------------------------------------------------------------------------------------------------------------------------------------------------------------------------------------------------------------------------------------------------------------------------------------------------------------------------------------------------------------------------------------------------------------------------------------------------------------------------------------------------------------------------------------------------------------------------------------------------------------------------------------------------------------------------------------------------------------------------------------------------------------------------------------------------------------------------------------------------------------------------------------------------------------------------------------------------------------------------------------------------------------------------------------------------------------------------------------------------------------------------------------------------------------------------------------------------------------------------------------------------------------------------------------------------------------------------------------------------------------------------------------------------------------------------------------------------------------------------------------------------------------------------------------------------------------------------------------------------------------------------------------------------------------------------------------------------------------------------------------------------------------------------------------------------------------------------------------------------------------------------------------------------------------------------------------------------------------------------------------------------------------------------------------------------------------------------------------------------------------------------------------------------------------------------------------------------------------------------------------------------------------------------------------------------------|
|  | <p>Goffman, D., Madden, R.C., Harrison, E.A., Merkat, I.R., Chazotte, C., 2007. Predictors of maternal mortality and near-miss maternal morbidity. <i>Journal of Perinatology</i> 27:597.</p> <p>Gray, K.E., Wallace, E.R., Nelson, K.R., Reed, S.D., Schiff, M.A., 2012. Population-based study of risk factors for severe maternal morbidity. <i>Paediatric and Perinatal Epidemiology</i> 26:506-14.</p> <p>Group, S.C.R.N.W., 2011. Association between stillbirth and risk factors known at pregnancy confirmation. <i>JAMA: the Journal of the American Medical Association</i> 306.</p> <p>Haelterman, E., Marcoux, S., Croteau, A., Dramaix, M., 2007. Population-based study on occupational risk factors for preeclampsia and gestational hypertension. <i>Scandinavian Journal of Work, Environment &amp; Health</i>:304-17.</p> <p>Hagues, R.J., Bae, D., Wickrama, K.K.A.S., 2017. Meditational pathways connecting secondary education and age at marriage to maternal mortality: A comparison between developing and developed countries. <i>Women &amp; Health</i> 57:189-207.</p> <p>Haider, G., Zehra, N., Munir, A.A., Haider, A., 2010. Risk factors of urinary tract infection in pregnancy. <i>JPMA - Journal of the Pakistan Medical Association</i> 60:213-6.</p> <p>Halileh, S., Abu-Rmeileh, N., Watt, G., Spencer, N., Gordon, N., 2008. Determinants of birthweight// gender based analysis. <i>Maternal &amp; Child Health Journal</i> 12:606-12.</p> <p>Harville, E.W., Knoepp, L.R., Wallace, M.E., Miller, K.S., 2018. Cervical pathways for racial disparities in preterm births: the Preterm Prediction Study. <i>Journal of Maternal-Fetal and Neonatal Medicine</i>:01-Jul.</p> <p>Hayward, I., Malcoe, L.H., Cleathero, L.A., Janssen, P.A., Lanphear, B.P., Hayes, M.V., Mattman, A., Pampalon, R., Venners, S.A., 2012. Investigating maternal risk factors as potential targets of intervention to reduce socioeconomic inequality in small for gestational age: a population-based study. <i>BMC Public Health</i> 12:333.</p> <p>Hegelund, E.R., Poulsen, G.J., Mortensen, L.H., 2019. Educational Attainment and Pregnancy Outcomes: A Danish Register-Based Study of the Influence of Childhood Social Disadvantage on Later Socioeconomic Disparities in Induced Abortion, Spontaneous Abortion, Stillbirth and Preterm Delivery. <i>Maternal &amp; Child Health Journal</i> 23:839-46.</p> <p>Henriksen, L., Schei, B., Vangen, S., Lukasse, M., 2014. Sexual violence and neonatal outcomes: A Norwegian population-based cohort study. <i>BMJ Open</i> 4 (10) (no pagination).</p> <p>Herrera, L.R., Kakehashi, M., 2001. An international data analysis on the level of maternal and child health in relation to socioeconomic factors. <i>Hiroshima Journal of Medical Sciences</i> 50:Sep-16.</p> <p>Herstad, L., Klungsoyr, K., Skjaerven, R., Tanbo, T., Forsen, L., Abyholm, T., Vangen, S., 2015. Maternal age and emergency operative deliveries at term: a population-based registry study among low-risk primiparous women. <i>BJOG</i> 122:1642.</p> <p>Heshmati, A., Mishra, G., Koupil, I., 2013. Childhood and adulthood socio-economic position and hypertensive disorders in pregnancy: the Uppsala Birth Cohort Multigenerational Study. <i>Journal of Epidemiology &amp; Community Health</i> 67:939-46.</p> <p>Hidalgo-Lopezosa, P., Cobo-Cuenca, A.I., Carmona-Torres, J.M., Luque-Carrillo, P., Rodriguez-Munoz, P.M., Rodriguez-Borrego, M.A., 2018. Factors associated with late fetal mortality. <i>Archives of Gynecology and Obstetrics</i> 297:1415-20.</p> <p>Hidalgo-Lopezosa, P., Jimenez-Ruz, A., Carmona-Torres, J.M., Hidalgo-Maestre, M., Rodriguez-Borrego, M.A., Lopez-Soto, P.J., 2019. Sociodemographic factors associated with preterm birth and low birth weight: A cross-sectional study. <i>Women and Birth</i>.</p> <p>Hirst, J.E., Villar, J., Victora, C.G., Papageorgiou, A.T., Finkton, D., Barros, F.C., Gravett, M.G., Giuliani, F., Purwar, M., et al., 2018. The antepartum stillbirth syndrome: risk factors and pregnancy conditions identified from the INTERGROWTH-21 Project. <i>BJOG</i> 125:1145.</p> <p>Holst, S., Kjaer, S.K., Jorgensen, M.E., Damm, P., Jensen, A., 2016. Fertility problems and risk of gestational diabetes mellitus: a nationwide cohort study. <i>Fertility and Sterility</i> 106:427-34.e1.</p> <p>Hoyt, A.T., Canfield, M.A., Romitti, P.A., Botto, L.D., Anderka, M.T., Krikov, S.V., Feldkamp, M.L., 2018. Does Maternal Exposure to Secondhand Tobacco Smoke During Pregnancy Increase the Risk for Preterm or Small-for-Gestational Age Birth? <i>Maternal and Child Health Journal</i> 22:1418-29.</p> <p>Hunter, J.E., Allen, E.G., Shin, M., Bean, L.J.H., Correa, A., Druschel, C., Hobbs, C.A., O'Leary, L.A., Romitti, P.A., et al., 2013. The association of low socioeconomic status and the risk of having a child with Down syndrome: A report from the National Down Syndrome Project. <i>Genetics in Medicine</i> 15:698-705.</p> <p>Huy, C., Loerbroks, A., Hornemann, A., Rohrig, S., Schneider, S., 2012. Prevalence, trend and determining factors of gestational diabetes in Germany. <i>Geburtshilfe und Frauenheilkunde</i> 72:311-15.</p> <p>Huynh, M., Parker, J.D., Harper, S., Pamuk, E., Schoendorf, K.C., 2005. Contextual effect of income inequality on birth outcomes. <i>International Journal of Epidemiology</i> 34:888-95.</p> <p>Ismail, L.C., Bishop, D.C., Pang, R., Ohuma, E.O., Kac, G., Abrams, B., Rasmussen, K., Barros, F.C., Hirst, J.E., et al., 2016. Gestational weight gain standards based on women enrolled in the Fetal Growth Longitudinal Study of the INTERGROWTH-21st project: A Prospective longitudinal cohort study. <i>BMJ (Online)</i> 352 (no pagination).</p> <p>Jaddoe, V.W., Bakker, R., Hofman, A., Mackenbach, J.P., Moll, H.A., Steegers, E.A., Witteman, J.C., 2007. Moderate alcohol consumption during pregnancy and the risk of low birth weight and preterm birth. The generation R study. <i>Annals of Epidemiology</i> 17:834-40.</p> <p>Jain, S., Guleria, K., Vaid, N.B., Suneja, A., Ahuja, S., 2016. Predictors and outcome of obstetric admissions to intensive care unit: A comparative study. <i>Indian Journal of Public Health</i> 60:159.</p> <p>Jansen, P.W., Tiemeier, H., Looman, C.W.N., Jaddoe, V.W.V., Hofman, A., Moll, H.A., Steegers, E.A.P., Verhulst, F.C., MacKenbach, J.P., et al., 2009. Explaining educational inequalities in birthweight: The Generation R Study. <i>Paediatric and Perinatal Epidemiology</i> 23:216-28.</p> <p>Jansen, P.W., Tiemeier, H., Verhulst, F.C., Burdorf, A., Jaddoe, V.W., Hofman, A., Moll, H.A., Verburg, B.O., Steegers, E.A., et al., 2010. Employment status and the risk of pregnancy complications: the Generation R Study. <i>Occupational &amp; Environmental Medicine</i> 67:387-94.</p> <p>Johansson, S., Villamor, E., Altman, M., Bonamy, A.K.E., Granath, F., Cnattingius, S., 2014. Maternal overweight and obesity in early pregnancy and risk of infant mortality: A Population based cohort study in Sweden. <i>BMJ (Online)</i> 349 (no pagination).</p> <p>Johnson, C.Y., Honein, M.A., Hobbs, C.A., Rasmussen, S.A., 2009. Prenatal diagnosis of orofacial clefts, National Birth Defects Prevention Study, 1998-2004. <i>Prenatal Diagnosis</i> 29:833-39.</p> <p>Joseph, K., Liston, R.M., Dodds, L., Dahlgren, L., Allen, A.C., 2007. Socioeconomic status and perinatal outcomes in a setting with universal access to essential health care services. <i>CMAJ</i> 177:583-90.</p> <p>Juárez, S., Revuelta Eugercios, B., 2013. Socioeconomic differences in low birth weight: Revisiting epidemiological approaches. <i>Revista Espanola de Investigaciones Sociologicas</i> 144:73-96.</p> <p>Juarez, S.P., Wagner, P., Merlo, J., 2014. Applying measures of discriminatory accuracy to revisit traditional risk factors for being small for gestational age in Sweden: a national cross-sectional study. <i>BMJ Open</i> 4:e005388.</p> <p>Kars, B., Tasligedik, G., Karsidag, Y.K., Byukbayrak, E.E., Pirimoglu, Z.M., Sargin, M., Turan, C., Unal, O., 2011. Between the years 2005-2009 FOR molar pregnancy treatment of patients with tracking and degerlendirmlres. <i>Turk Jinekolojik Onkoloji Dergisi</i> 14:26-32.</p> <p>Kaur, M., Chauhan, A., Manzar, M.D., Rajput, M.M., 2015. Maternal anaemia and neonatal outcome: A prospective study on urban pregnant women. <i>Journal of Clinical and Diagnostic Research</i> 9:QC04-QC08.</p> |
|--|----------------------------------------------------------------------------------------------------------------------------------------------------------------------------------------------------------------------------------------------------------------------------------------------------------------------------------------------------------------------------------------------------------------------------------------------------------------------------------------------------------------------------------------------------------------------------------------------------------------------------------------------------------------------------------------------------------------------------------------------------------------------------------------------------------------------------------------------------------------------------------------------------------------------------------------------------------------------------------------------------------------------------------------------------------------------------------------------------------------------------------------------------------------------------------------------------------------------------------------------------------------------------------------------------------------------------------------------------------------------------------------------------------------------------------------------------------------------------------------------------------------------------------------------------------------------------------------------------------------------------------------------------------------------------------------------------------------------------------------------------------------------------------------------------------------------------------------------------------------------------------------------------------------------------------------------------------------------------------------------------------------------------------------------------------------------------------------------------------------------------------------------------------------------------------------------------------------------------------------------------------------------------------------------------------------------------------------------------------------------------------------------------------------------------------------------------------------------------------------------------------------------------------------------------------------------------------------------------------------------------------------------------------------------------------------------------------------------------------------------------------------------------------------------------------------------------------------------------------------------------------------------------------------------------------------------------------------------------------------------------------------------------------------------------------------------------------------------------------------------------------------------------------------------------------------------------------------------------------------------------------------------------------------------------------------------------------------------------------------------------------------------------------------------------------------------------------------------------------------------------------------------------------------------------------------------------------------------------------------------------------------------------------------------------------------------------------------------------------------------------------------------------------------------------------------------------------------------------------------------------------------------------------------------------------------------------------------------------------------------------------------------------------------------------------------------------------------------------------------------------------------------------------------------------------------------------------------------------------------------------------------------------------------------------------------------------------------------------------------------------------------------------------------------------------------------------------------------------------------------------------------------------------------------------------------------------------------------------------------------------------------------------------------------------------------------------------------------------------------------------------------------------------------------------------------------------------------------------------------------------------------------------------------------------------------------------------------------------------------------------------------------------------------------------------------------------------------------------------------------------------------------------------------------------------------------------------------------------------------------------------------------------------------------------------------------------------------------------------------------------------------------------------------------------------------------------------------------------------------------------------------------------------------------------------------------------------------------------------------------------------------------------------------------------------------------------------------------------------------------------------------------------------------------------------------------------------------------------------------------------------------------------------------------------------------------------------------------------------------------------------------------------------------------------------------------------------------------------------------------------------------------------------------------------------------------------------------------------------------------------------------------------------------------------------------------------------------------------------------------------------------------------------------------------------------------------------------------------------------------------------------------------------------------------------------------------------------------------------------------------------------------------------------------------------------------------------------------------------------------------------------------------------------------------------------------------------------------------------------------------------------------------------------------------------------------------------------------------------------------------------------------------------------------------------------------------------------------------------------------------------------------------------------------------------------------------------------------------------------------------------------------------------------------------------------------------------------------------------------------------------------------------------------------------------------------------------------------------------------------------------------------------------------------------------------------------------------------------------------------------------------------------------------------------------------------------------------------------------------------------------------------------------------------------------------------------------------------------------------------------------------------------------------------------------------------------------------------------------------------------------------------------------------------------------------------------------------------------------------------------------------------------------------------------------------------------------------------------------------------------------------------------------------------------------------------------------------------------------------------------------------------------------------------------------------------------------------------------------------------------------------------------------------------------------------------------------------------------------------------------------------------------------|

Kelly, L.E., Shah, P.S., Hakansson, S., Kusuda, S., Adams, M., Lee, S.K., Sjors, G., Vento, M., Rusconi, F., et al., 2017. Perinatal health services organization for preterm births: A multinational comparison. *Journal of Perinatology* 37:762-68.

Kershenbaum, A.D., Langston, M.A., Levine, R.S., Saxton, A.M., Oyana, T.J., Kilbourne, B.J., Rogers, G.L., Gittner, L.S., Baktash, S.H., et al., 2014. Exploration of preterm birth rates using the public health exposome database and computational analysis methods. *International Journal of Environmental Research and Public Health* 11:12346-66.

Khashan, A.S., Everard, C., McCowan, L.M.E., Dekker, G., Moss-Morris, R., Baker, P.N., Poston, L., Walker, J.J., Kenny, L.C., 2014. Second-trimester maternal distress increases the risk of small for gestational age. *Psychological Medicine* 44:2799-810.

Kimelman, M., Zitko, P., Hernandez, D., Vidal, N., 2017. Prenatal risk factors for the mother-newborn attachment process. *Acta Psiquiatrica y Psicologica de America Latina* 63:32-40.

Kodla, C.S., 2015. A study of prevalence, causes, risk factors and outcome of severe obstetrics haemorrhage. *Journal of Science and Innovative Research* 4:83-87.

Koupilova, I., Rahu, K., Rahu, M., Karro, H., Leon, D.A., 2000. Social determinants of birthweight and length of gestation in Estonia during the transition to democracy. *International Journal of Epidemiology* 29:118-24.

Kramer, M.S., Goulet, L., Lydon, J., Seguin, L., McNamara, H., Dassa, C., Platt, R.W., Fong Chen, M., Gauthier, H., et al., 2001. Socio-economic disparities in preterm birth: causal pathways and mechanisms. *Paediatric and Perinatal Epidemiology* 15:104-23.

Kramer, M.S., Wilkins, R., Goulet, L., Séguin, L., Lydon, J., Kahn, S.R., McNamara, H., Dassa, C., Dahhou, M., et al., 2009. Investigating socio-economic disparities in preterm birth: evidence for selective study participation and selection bias. *Paediatric and Perinatal Epidemiology* 23:301-09.

Kraschewski, J.L., Chuang, C.H., Downs, D.S., Weisman, C.S., McCamant, E.L., Baptiste-Roberts, K., Zhu, J., Kjerulff, K.H., 2013. Association of prenatal physical activity and gestational weight gain: results from the first baby study. *Women's Health Issues* 23:e233-e38.

Kyriopoulos, I., Nikoloski, Z., Mossialos, E., 2019. Does economic recession impact newborn health? Evidence from Greece. *Social Science & Medicine* 237:112451.

Kyrklund-Blomberg, N.B., Gennser, G., Cnattingius, S., 2001. Placental abruption and perinatal death. *Paediatric and Perinatal Epidemiology* 15:290-7.

Lagerros, Y.T., Cnattingius, S., Granath, F., Hanson, U., Wikstrom, A.K., 2012. From infancy to pregnancy: Birth weight, body mass index, and the risk of gestational diabetes. *European Journal of Epidemiology* 27:799-805.

Lambertini, L., Li, Q., Ma, Y., Zhang, W., Hao, K., Marsit, C., Chen, J., Nomura, Y., 2019. Placental imprinted gene expression mediates the effects of maternal psychosocial stress during pregnancy on fetal growth. *Journal of Developmental Origins of Health and Disease*:01-Oct.

Lasbeur, L., Kaminski, M., Ancel, P.Y., du Mazaubrun, C., Zeitlin, J., Bréart, G., Dehan, M., Vodovar, M., Voyer, M., et al., 2006. Analysis of social inequalities in perinatal health using census data: The risk of very preterm birth in the Paris region. *Population* 61:485-502.

Lee, B.E., Ha, M., Park, H., Hong, Y.C., Kim, Y., Kim, Y.J., Ha, E.H., 2011. Psychosocial work stress during pregnancy and birthweight. *Paediatric and Perinatal Epidemiology* 25:246-54.

Lee, K.A., Chang, M.H., Park, M.-H., Park, H., Ha, E.H., Park, E.A., Kim, Y.J., 2011. A Model for Prediction of Spontaneous Preterm Birth in Asymptomatic Women. *Journal of Women's Health* (15409996) 20:1825-31.

Leigh, B., Milgrom, J., 2008. Risk factors for antenatal depression, postnatal depression and parenting stress. *BMC Psychiatry* 8:24.

Lekea-Karanika, V., Tzoumaka-Bakoula, C., Matsaniotis, N.S., 1999. Sociodemographic determinants of low birthweight in Greece: A population study. *Paediatric and Perinatal Epidemiology* 13:65-77.

Lelong, A., Jiroff, L., Blanquet, M., Mourgues, C., Leymarie, M.C., Gerbaud, L., Lémery, D., Vendittelli, F., 2015. Is individual social deprivation associated with adverse perinatal outcomes? Results of a French multicentre cross-sectional survey. *Journal of Preventive Medicine and Hygiene* 56:E95-E101.

Li, C., 2013. Examining the relationship between maternal central fat patterning and infant body composition. University of Kansas.

Li, X., Sundquist, J., Sundquist, K., 2010. Parental occupation and risk of small-for-gestational-age births: A nationwide epidemiological study in Sweden. *Human Reproduction* 25:1044-50.

Lin, H.C., Chiu, C.C.J., Chen, S.F., Lou, H.Y., Chiu, W.T., Chen, Y.H., 2010. Ulcerative colitis and pregnancy outcomes in an Asian population. *American Journal of Gastroenterology* 105:387-94.

Lin, L., Chen, Y.-H., Sun, W., Gong, J.-J., Li, P., Chen, J.-J., Yan, H., Ren, L.-W., Chen, D.-J., 2019. Risk factors of obstetric admissions to the intensive care unit: An 8-year retrospective study. *Medicine* 98.

Lin, S., Herdt-Losavio, M.L., Chapman, B.R., Munsie, J.-P., Olshan, A.F., Druschel, C.M., 2013. Maternal occupation and the risk of major birth defects: a follow-up analysis from the National Birth Defects Prevention Study. *International Journal of Hygiene & Environmental Health* 216:317-23.

Lin, Y.C., Chen, M.H., Hsieh, C.J., Chen, P.C., 2011. Effect of rotating shift work on childbearing and birth weight: A study of women working in a semiconductor manufacturing factory. *World Journal of Pediatrics* 7:129-35.

Lina, W., Bo, Y., Shiyuan, Z., Huafang, G., Fengyu, W., Jiping, Z., Haili, W., Yanli, W., 2018. Risk factors and methylenetetrahydrofolate reductase gene in congenital heart disease. *Journal of Thoracic Disease* 10:441-47.

Lindqvist, M., Persson, M., Lindkvist, M., Mogren, I., 2014. No consensus on gestational diabetes mellitus screening regimes in Sweden: Pregnancy outcomes in relation to different screening regimes 2011 to 2012, a cross-sectional study. *BMC Pregnancy and Childbirth* 14 (1) (no pagination).

Liu, L., Setse, R., Grogan, R., Powe, N.R., Nicholson, W.K., 2013. The effect of depression symptoms and social support on black-white differences in health-related quality of life in early pregnancy: the health status in pregnancy (HIP) study. *BMC Pregnancy and Childbirth* 13:9.

Liu, Y., Murphy, S.K., Murtha, A.P., Fuemmeler, B.F., Schildkraut, J., Huang, Z., Overcash, F., Kurtzberg, J., Jirtle, R., et al., 2012. Depression in pregnancy, infant birth weight and DNA methylation of imprint regulatory elements. *Epigenetics* 7:735-46.

Longo, D.R., Kruse, R.L., LeFevre, M.L., Schramm, W.F., Stockbauer, J.W., Howell, V., 1999. An investigation of social and class differences in very-low-birth-weight outcomes: a continuing public health concern. *Journal of Health Care Finance* 25:75-89.

Lorente, C., Cordier, S., Bergeret, A., De Walle, H.E.K., Goujard, J., Ayme, S., Knill-Jones, R., Calzolari, E., Bianchi, F., et al., 2000. Maternal occupational risk factors for oral clefts. *Scandinavian Journal of Work, Environment and Health* 26:137-45.

Luo, B., Ma, X., 2013. Risk factors for preeclampsia: a case-control study. *Hypertension in Pregnancy* 32:432-38.

Luo, Z.-C., Wilkins, R., Kramer, M.S., 2006. Effect of neighbourhood income and maternal education on birth outcomes: a population-based study. *CMAJ* 174:1415-20.

Luque-Fernandez, M.A., Franco, M., Gelaye, B., Schomaker, M., Garitano, I.G., D'Este, C., Williams, M.A., 2013. Unemployment and stillbirth risk among foreign-born and Spanish pregnant women in Spain, 2007-2010: A multilevel analysis study. *European Journal of Epidemiology* 28:991-99.

Luque-Fernandez, M.A., Lone, N.I., Gutierrez-Garitano, I., Bueno-Cavanillas, A., 2012. Stillbirth risk by maternal socio-economic status and country of origin: a population-based observational study in Spain, 2007-08. *European Journal of Public Health* 22:524-29.

Luque-Fernandez, M.A., Thomas, A., Gelaye, B., Racape, J., Sanchez, M.J., Williams, M.A., 2019. Secular trends in stillbirth by maternal socioeconomic status in Spain 2007-15: a population-based study of 4 million births. *European journal of public health*. 23.

Magnussen, E.B., Vatten, L.J., Lund-Nilsen, T.I., Salvesen, K.A., Davey Smith, G., Romundstad, P.R., 2007. Prepregnancy Cardiovascular Risk Factors as Predictors of Pre-Eclampsia: Population Based Cohort Study. *BMJ (British Medical Journal)* 335:978-81.

Maleckiene, L., Nadisauskiene, R., Bergstrom, S., 2001. Socio-economic, demographic and obstetric risk factors for late fetal death of unknown etiology in Lithuania: A case - Referent study. *Acta Obstetrica et Gynecologica Scandinavica* 80:321-25.

Mannocci, A., Vaschetto, C., Semyonov, L., Poppa, G., Massimi, A., Rabacchi, G., Boccia, A., La Torre, G., 2014. Maternal smoking and socio-demographic characteristics in correlation with low birth weight: A Turin (piedmont) study. *Zdravstveno Varstvo* 53:221-25.

Marcoux, S., Bérubé, S., Brisson, C., Mondor, M., 1999. Job strain and pregnancy-induced hypertension. *Epidemiology*:376-82.

Margerison-Zilko, C.E., Shrimali, B.P., Eskenazi, B., Lahiff, M., Lindquist, A.R., Abrams, B.F., 2012. Trimester of maternal gestational weight gain and offspring body weight at birth and age five. *Maternal and Child Health Journal* 16:1215-23.

Marquez-Calderon, S., Ruiz-Ramos, M., Juarez, S., Lopez, J.L., 2011. Caesarean delivery in Andalusia, Spain. Relationship with social, clinical and health services factors (2007-2009). [Spanish]. *Revista Espanola de Salud Publica* 85:205-15.

Martins, M.E.P., Esmeraldo, C.U.P., Sabia, J.P.D., Carvalho, J.H.L., Suano-Souza, F.I., Sarni, R.O.S., 2018. Vitamin D Postpartum Concentrations: Relationship with Nutritional Condition and Morbidities during Pregnancy. *Journal of Pregnancy* 2018:1070528.

Masukume, G., Khashan, A.S., Kenny, L.C., Baker, P.N., Nelson, G., 2015. Risk factors and birth outcomes of anaemia in early pregnancy in a nulliparous cohort. *PLoS One* 10 (4) (no pagination).

Mathews, M.E., Leerkes, E.M., Lovelady, C.A., Labban, J.D., 2014. Psychosocial predictors of primiparous breastfeeding initiation and duration. *Journal of Human Lactation* : official journal of International Lactation Consultant Association 30:480-87.

McCowan, L.M., Dekker, G.A., Chan, E., Stewart, A., Chappell, L.C., Hunter, M., Moss-Morris, R., North, R.A., 2009. Spontaneous preterm birth and small for gestational age infants in women who stop smoking early in pregnancy: prospective cohort study. *BMJ* 338:b1081.

McCowan, L.M., Groom, K.M., 2013. Identifying risk factors for stillbirth. *BMJ*.

McGovern, M.E., 2016. Progress and the lack of progress in addressing infant health and infant health inequalities in Ireland during the 20th century. Statistical and Social Inquiry Society of Ireland, Barrington Lecture. [www.ssi.ie/McGovern\\_Infant\\_Mortality.pdf](http://www.ssi.ie/McGovern_Infant_Mortality.pdf).

Mealing, N., Roberts, C., Ford, J., Simpson, J., Morris, J., 2009. Trends in induction of labour, 1998–2007: a population-based study. *Australian and New Zealand Journal of Obstetrics and Gynaecology* 49:599-605.

Medveczky, E., Puhó, E., 2004. Relationship of the parental socio-economic status and the prevention of neural-tube defects in Hungary. *Magyar Noorvosok Lapja* 67:35-43.

Meltzer-Brody, S., Maegbaek, M.L., Medland, S.E., Miller, W.C., Sullivan, P., Munk-Olsen, T., 2017. Obstetrical, pregnancy and socio-economic predictors for new-onset severe postpartum psychiatric disorders in primiparous women. *Psychological Medicine* 47:1427-41.

Messer, L.C., Kaufman, J.S., Dole, N., Savitz, D.A., Laraia, B.A., 2006. Neighborhood crime, deprivation, and preterm birth. *Annals of Epidemiology* 16:455-62.

Messer, L.C., Vinikoor, L.C., Laraia, B.A., Kaufman, J.S., Eyester, J., Holzman, C., Culhane, J., Elo, I., Burke, J.G., et al., 2008. Socioeconomic domains and associations with preterm birth. *Social science & Medicine* 67:1247-57.

Miller, E.C., Yaghi, S., Boehme, A.K., Willey, J.Z., Elkind, M.S., Marshall, R.S., 2016. Mechanisms and outcomes of stroke during pregnancy and the postpartum period: a cross-sectional study. *Neurology: Clinical Practice* 6:29-39.

Miranda Amorim, F.C., do Nascimento Neves, A.C., de Sousa Moreira, F., da Silva Oliveira, A.D., Sampaio Nery, I., 2017. Profile of pregnant women with pre-eclampsia. *Journal of Nursing UFPE / Revista de Enfermagem UFPE* 11:1574-82.

Mitchell, A., Christian, L., 2017. Financial strain and birth weight: the mediating role of psychological distress. *Archives of Women's Mental Health* 20:201-08.

Mitchell, E.A., Robinson, E., Clark, P.M., Becroft, D.M.O., Glavish, N., Pattison, N.S., Pryor, J.E., Thompson, J.M.D., Wild, C.J., 2004. Maternal nutritional risk factor for small for gestational age babies in a developed country: a case-control study. *Archives of Disease in Childhood -- Fetal & Neonatal Edition* 89:F431-5.

Morales-Suárez-Varela, M., Kaerlev, L., Jin Liang, Z., Bonde, J.P., Nohr, E.A., Llopis-González, A., Gimeno-Clemente, N., Olsen, J., 2011. Unemployment and pregnancy outcomes: A study within the Danish National Birth Cohort. *Scandinavian Journal of Public Health* 39:449-56.

Moreira, M.E.F.H., Silva, C.L., Freitas, R.F., Macedo, M.S., Lessa, A.D.C., 2017a. Socioeconomic and gestational determinants of birth weight of term infants. [Portuguese]. *Medicina (Brazil)* 50:83-90.

Moreira, M.E.F.H., Silva, C.L., Freitas, R.F., Macêdo, M.S., Lessa, A.D.C., 2017b. Socioeconomic and gestational determinants of birth weight of term infants. *Medicina (Brazil)* 50:83-90.

Morgen, C.S., Bjork, C., Andersen, P.K., Mortensen, L.H., Nybo Andersen, A.M., 2008. Socioeconomic position and the risk of preterm birth - A study within the Danish National Birth Cohort. *International Journal of Epidemiology* 37:1109-20.

Mortensen, L.H., 2013. Socioeconomic inequality in birth weight and gestational age in Denmark 1996–2007: Using a family-based approach to explore alternative explanations. *Social Science & Medicine* 76:1-7.

Mortensen, L.H., Diderichsen, F., Arntzen, A., Gissler, M., Chattingius, S., Schnor, O., Davey-Smith, G., Nybo Andersen, A.M., 2008. Social inequality in fetal growth: A comparative study of Denmark, Finland, Norway and Sweden in the period 1981-2000. *Journal of Epidemiology and Community Health* 62:325-31.

Mortensen, L.H., Diderichsen, F., Smith, G.D., Andersen, A.M.N., 2009. The social gradient in birthweight at term: Quantification of the mediating role of maternal smoking and body mass index. *Human Reproduction* 24:2629-35.

Mott, S., Schiller, C., Richards, J., O'Hara, M., Stuart, S., 2011. Depression and anxiety among postpartum and adoptive mothers. *Archives of Women's Mental Health* 14:335-43.

Moutquin, J.-M., 2003. Socio-economic and psychosocial factors in the management and prevention of preterm labour. *BJOG: An International Journal of Obstetrics and Gynaecology* 110:56-60.

Murphy, D.J., Fahey, T., 2013. A retrospective cohort study of mode of delivery among public and private patients in an integrated maternity hospital setting. *BMJ open* 3:e003865.

Murthy, B.K., Murthy, M.B., Prabhu, P.M., 2013. Maternal mortality in a tertiary care hospital: A 10-year review. *International Journal of Preventive Medicine* 4:105-09.

Negggers, Y., Goldenberg, R.L., 2003. Some thoughts on body mass index, micronutrient intakes and pregnancy outcome. *The Journal of Nutrition* 133:1737S-40S.

Neogi, S.B., Sharma, J., Negandhi, P., Chauhan, M., Reddy, S., Sethy, G., 2018. Risk factors for stillbirths: how much can a responsive health system prevent? *BMC Pregnancy and Childbirth* 18:33.

Nepomnyaschy, L., 2009. Socioeconomic gradients in infant health across race and ethnicity. *Maternal and Child Health Journal* 13:720-31.

Neves da Silva Velho, L., Aparecida Vieira, M., de Almeida Lima, C., Marques da Costa, F., Almeida Carneiro, J., Veloso Dias, O., 2014. Sociodemographic characteristics of women who suffered miscarriages. *Journal of Nursing UFPE / Revista de Enfermagem UFPE* 8:2983-90.

Newman, R.B., Goldenberg, R.L., Moawad, A.H., Iams, J., Meis, P., Das, A., Miodovnik, M., Caritis, S., Thurnau, G., et al., 2001. Occupational fatigue and preterm premature rupture of membranes. *American Journal of Obstetrics and Gynecology* 184:438-46.

Nilses, C., Persson, M., Lindkvist, M., Petersson, K., Mogren, I., 2017. High weight gain during pregnancy increases the risk for emergency caesarean section - Population-based data from the Swedish Maternal Health Care Register 2011-2012. *Sexual and Reproductive Healthcare* 11:47-52.

Nilsson, E., Lichtenstein, P., Cnattingius, S., Murray, R.M., Hultman, C.M., 2002. Women with schizophrenia: pregnancy outcome and infant death among their offspring. *Schizophrenia Research* 58:221-29.

Noronha, J.A., Bhaduri, A., Vinod Bhat, H., Kamath, A., 2010. Maternal risk factors and anaemia in pregnancy: a prospective retrospective cohort study. *Journal of Obstetrics & Gynaecology* 30:132-6.

Norsker, F.N., Espenhain, L., Rogvi, S.A., Morgen, C.S., Andersen, P.K., Andersen, A.M.N., 2012. Socioeconomic position and the risk of spontaneous abortion: A study within the Danish National Birth Cohort. *BMJ Open* 2 (3) (no pagination).

O'donnell, M.J., Xavier, D., Liu, L., Zhang, H., Chin, S.L., Rao-Melacini, P., Rangarajan, S., Islam, S., Pais, P., et al., 2010. Risk factors for ischaemic and intracerebral haemorrhagic stroke in 22 countries (the INTERSTROKE study): a case-control study. *The Lancet* 376:112-23.

Odd, D., Lewis, G., Gunnell, D., Rasmussen, F., 2014. Risk of low Apgar scores and socioeconomic status over a 30-year period. *Journal of Maternal-Fetal & Neonatal Medicine* 27:603-07.

Oftedal, A.M., Busterud, K., Irgens, L.M., Haug, K., Rasmussen, S., 2016. Socio-economic risk factors for preterm birth in Norway 1999-2009. *Scandinavian Journal of Public Health* 44:587-92.

Olesen, C., Thrane, N., Rønholdt, A., Olsen, J., Henriksen, T.B., 2009. Association between social position and congenital anomalies: a population-based study among 19,874 Danish women. *Scandinavian Journal of Public Health* 37:246-51.

Oliveira, C., Seleme, M., Cansi, P.F., Consentino, R.F., Kumakura, F.Y., Moreira, G.A., Berghmans, B., 2013. Urinary incontinence in pregnant women and its relation with socio-demographic variables and quality of life. *Revista Da Associacao Medica Brasileira* 59:460-6.

Olsen, O., Madsen, M., 1999. Effects of maternal education on infant mortality and stillbirths in Denmark: original article. *Scandinavian Journal of Public Health* 27:128-36.

Osborn, J.F., Cattaruzza, M.S., Spinelli, A., 2000. Risk of spontaneous abortion in Italy, 1978-1995, and the effect of maternal age, gravidity, marital status, and education. *American Journal of Epidemiology* 151:98-105.

Oskoui, M., Messerlian, C., Blair, A., Gamache, P., Shevell, M., 2016. Variation in cerebral palsy profile by socio-economic status. *Developmental Medicine & Child Neurology* 58:160-66.

Ota, E., Ganchimeg, T., Morisaki, N., Vogel, J.P., Pileggi, C., Ortiz-Panoso, E., Souza, J.P., Mori, R., Maternal, W.M.-C.S.o., et al., 2014. Risk factors and adverse perinatal outcomes among term and preterm infants born small-for-gestational-age: secondary analyses of the WHO Multi-Country Survey on Maternal and Newborn Health. *PLoS One* 9:e105155.

Paarlberg, K.M., Vingerhoets, A.J., Passchier, J., Dekker, G.A., Heinen, A.G., van Geijn, H.P., 1999. Psychosocial predictors of low birthweight: a prospective study. *British Journal of Obstetrics & Gynaecology* 106:834-41.

Paaauw, J.D., Bierling, S., Cook, C.R., Davis, A.T., Paaauw, J.D., Bierling, S., Cook, C.R., Davis, A.T., 2005. Hyperemesis gravidarum and fetal outcome. *JPN Journal of Parenteral & Enteral Nutrition* 29:93-96.

Pallasmaa, N., Ekblad, U., AITOKALLIO-TALLBERG, A., Uotila, J., Raudaskoski, T., ULANDER, V.M., Hurme, S., 2010. Cesarean delivery in Finland: maternal complications and obstetric risk factors. *Acta obstetrica et Gynecologica Scandinavica* 89:896-902.

Pandolfo, M.C., Catania, M., Dardanoni, G., Rinaldo, C., Bertolazzi, G., Ferrara, C., Palumbo, E., D'Anna, M.R., 2016. Epidemiology of preeclampsia in a Sicilian Hospital. *Giornale Italiano di Ostetricia e Ginecologia* 38:171-75.

Paputo, L., Banhid, F., Czeizel, A.E., 2011. Maternal characteristics and birth outcomes of pregnant women who had offspring with congenital ear abnormalities: a population-based casecontrol study. *Journal of Maternal-Fetal and Neonatal Medicine* 24:1107-14.

Parazzini, F., Cipriani, S., Chiaffarino, F., Sandretti, F., Bortolus, R., Chiantera, V., 2007. Induced abortion and risk of small-for-gestational-age birth. *BJOG* 114:1414.

Patiño Suárez, J.T., Campos-Uscanga, Y., 2018. Las semanas de gestación como factor asociado a la práctica de la lactancia materna inmediata. *Avances en Enfermería* 36:153-60.

Pevalin, D.J., Wade, T.J., Brannigan, A., Sauve, R., 2001. Beyond biology: The social context of prenatal behaviour and birth outcomes. *Sozial- und Präventivmedizin* 46:233-39.

Peyvandi, S., Rychik, J., Zhang, X., Shea, J.A., Goldmuntz, E., 2015. Preconception Folic Acid Use and Recurrence Risk Counseling for Congenital Heart Disease. *Congenital Heart Disease* 10:219-25.

Phillips, G.S., Wise, L.A., Rich-Edwards, J.W., Stampfer, M.J., Rosenberg, L., 2009. Income incongruity, relative household income, and preterm birth in the Black Women's Health Study. *Social Science & Medicine* 68:2122-28.

Pierik, F.H., Burdorf, A., Deddens, J.A., Juttmann, R.E., Weber, R.F.A., 2004. Maternal and paternal risk factors for cryptorchidism and hypospadias: a case-control study in newborn boys. *Environmental Health Perspectives* 112:1570-76.

Poulsen, G., Andersen, A.M.N., Mortensen, L.H., Jaddoe, V.W.V., Raat, H., Magnus, P., Stoltenberg, C., Osler, M., Andersen, A.-M.N., 2019. Does smoking during pregnancy mediate educational disparities in preterm delivery? Findings from three large birth cohorts. *Paediatric & Perinatal Epidemiology* 33:164-71.

Profit, J., Zupancic, J.A.F., McCormick, M.C., Richardson, D.K., Escobar, G.J., Tucker, J., Tarnow-Mordi, W., Parry, G., 2006. Moderately premature infants at Kaiser Permanente Medical Care Program in California are discharged home earlier than their peers in Massachusetts and the United Kingdom. *Archives of Disease in Childhood: Fetal and Neonatal Edition* 91:F245-F50.

Prunet, C., Delnord, M., Saurel-Cubizolles, M.J., Goffinet, F., Blondel, B., 2017. Risk factors of preterm birth in France in 2010 and changes since 1995: Results from the French National Perinatal Surveys. *Journal of Gynecology Obstetrics and Human Reproduction* 46:19-28.

Pschirrer, E.R., Monga, M., 2000. Risk factors for preterm labor. *Clinical Obstetrics and Gynecology* 43:727-34.

Raatikainen, K., Heiskanen, N., Heinonen, S., 2006. Does unemployment in family affect pregnancy outcome in conditions of high quality maternity care? *BMC Public Health* 6:46.

Racape, J., De Spiegelaere, M., Alexander, S., Dramaix, M., Buekens, P., Haelterman, E., 2010. High perinatal mortality rate among immigrants in Brussels. *European Journal of Public Health* 20:536-42.

Räsänen, S., Gissler, M., Sankilampi, U., Saari, J., Kramer, M.R., Heinonen, S., 2013. Contribution of socioeconomic status to the risk of small for gestational age infants—a population-based study of 1,390,165 singleton live births in Finland. *International Journal for Equity in Health* 12:28.

Rasch, V., Gammeltoft, T., Knudsen, L.B., Tobiassen, C., Ginzal, A., Kempf, L., 2008. Induced abortion in Denmark: effect of socio-economic situation and country of birth. *European Journal of Public Health* 18:144-49.

Rasch, V., Knudsen, L.B., Wielandt, H., 2001. Pregnancy planning and acceptance among Danish pregnant women. *Acta Obstetrica et Gynecologica Scandinavica* 80:1030-35.

Rasch, V., Wielandt, H., Knudsen, L.B., 2002. Living conditions, contraceptive use and the choice of induced abortion among pregnant women in Denmark. *Scandinavian Journal of Public Health* 30:293-99.

Ray, J., Vermeulen, M., Shapiro, J., Kenshole, A., 2001. Maternal and neonatal outcomes in pregestational and gestational diabetes mellitus, and the influence of maternal obesity and weight gain: the DEPOSIT\* study. *QJM* 94:347-56.

Read, A.W., Stanley, F.J., 1993. Small-for-gestational-age term birth: the contribution of socio-economic, behavioural and biological factors to recurrence. *Paediatric and Perinatal Epidemiology* 7:177-94.

Reading, R., 2008. Explaining educational inequalities in preterm birth. The Generation R Study. *Child Care, Health and Development* 34:700.

Reime, B., Ratner, P.A., Tomaselli-Reime, S.N., Kelly, A., Schuecking, B.A., Wenzlaff, P., 2006. The Role of Mediating Factors in the Association between Social Deprivation and Low Birth Weight in Germany. *Social Science & Medicine* 62:1731-44.

Reyes, L., Barka, N., Gyurkovits, Z., Paulik, E., Nemeth, G., Orvos, H., 2018. Predictors of caesarean section—a cross-sectional study in Hungary. *Journal of Maternal-Fetal and Neonatal Medicine* 31:320-24.

Restall, A., Taylor, R.S., Thompson, J., Flower, D., Dekker, G.A., Kenny, L.C., Poston, L., McCowan, L.M., 2014. Risk factors for excessive gestational weight gain in a healthy, nulliparous cohort. *Journal of Obesity* 2014.

Ribeiro, J.F., Oliveira Rodrigues, C., Rodrigues Bezerra, V.o., de Almeida Chaves Soares, M.d.S., Germano Sousa, P., 2015. Sociodemographic and clinical characteristics of parturients with preeclampsia. *Journal of Nursing UFPE / Revista de Enfermagem UFPE* 9:7917-23.

Ribeiro Lages, C.D., Oliveira de Sousa, J.C., Bezerra Cunha, K.J., da Costa Silva, N., Melo Guimarães dos Santos, T.M., 2014. Fatores preditores para a admissão do recém-nascido na unidade de terapia intensiva...Predictive factors for the admission of a newborn in an intensive care unit. *Rev Rene* 15:03-Nov.

Rifas-Shiman, S.L., Fleisch, A., Hivert, M.F., Mantzoros, C., Gillman, M.W., Oken, E., 2017. First and second trimester gestational weight gains are most strongly associated with cord blood levels of hormones at delivery important for glycemic control and somatic growth. *Metabolism: Clinical and Experimental* 69:112-19.

Robert, E., Despiegelaere, M., Dramaix, M., Swennen, B., 2014. Breastfeeding in the French-speaking community of Belgium (2009). [French]. *Archives de Pédiatrie* 21:355-62.

Roberts, C.L., Algert, C.S., Carnegie, M., Peat, B., 2002. Operative delivery during labour: trends and predictive factors. *Paediatric and Perinatal Epidemiology* 16:115-23.

Roberts, C.L., Ford, J.B., Algert, C.S., Bell, J.C., Simpson, J.M., Morris, J.M., 2009. Trends in adverse maternal outcomes during childbirth: a population-based study of severe maternal morbidity. *BMC Pregnancy and Childbirth* 9:7.

Robertson, E., Malmstrom, M., Johansson, S.E., 2005. Do foreign-born women in Sweden have an increased risk of non-normal childbirth? *Acta Obstetrica et Gynecologica Scandinavica* 84:825-32.

Rocheleau, C.M., Bertke, S.J., Lawson, C.C., Romitti, P.A., Desrosiers, T.A., Agopian, A.J., Bell, E., Gilboa, S.M., National Birth Defects Prevention, S., 2017. Factors associated with employment status before and during pregnancy: Implications for studies of pregnancy outcomes. *American Journal of Industrial Medicine* 60:329-41.

Rodrigues, T., Barros, H., 2008. Short interpregnancy interval and risk of spontaneous preterm delivery. *European Journal of Obstetrics and Gynecology and Reproductive Biology* 136:184-88.

Rodríguez, C., Regidor, E., Gutiérrez-Fisac, J.L., 1995. Low birth weight in Spain associated with sociodemographic factors. *Journal of Epidemiology & Community Health* 49:38-42.

Rojas, G., Fritsch, R., Solis, J., Gonzalez, M., Guajardo, V., Araya, R., 2006. [Quality of life of women depressed in the post-partum period]. *Revista Medica de Chile* 134:713-20.

Rom, A.L., Mortensen, L.H., Cnattingius, S., Arntzen, A., Gissler, M., Andersen, A.-M.N., 2012. A comparative study of educational inequality in the risk of stillbirth in Denmark, Finland, Norway and Sweden 1981-2000. *Journal of Epidemiology & Community Health* 66:240-46.

Rönö, K., Masalin, S., Kautiainen, H., Gissler, M., Raina, M., Eriksson, J.G., Laine, M.K., 2019. Impact of maternal income on the risk of gestational diabetes mellitus in primiparous women. *Diabetic Medicine* 36:214-20.

Rosa, M.J., Nentin, F., Bosquet Enlow, M., Hacker, M.R., Pollas, N., Coull, B., Wright, R.J., 2019. Sex-specific associations between prenatal negative life events and birth outcomes. *Stress*:1-7.

Ruth, C.A., Roos, N., Hildes-Ripstein, E., Brownell, M., 2012. 'The influence of gestational age and socioeconomic status on neonatal outcomes in late preterm and early term gestation: A population based study'. *BMC Pregnancy and Childbirth* 12 (no pagination).

Sachdeva, S., Nanda, S., Bhalla, K., Sachdeva, R., 2014. Gross congenital malformation at birth in a government hospital. *Indian Journal of Public Health* 58:54-56.

Sadovsky, A.D., Matijasevich, A., Santos, I.S., Barros, F.C., Miranda, A.E., Silveira, M.F., 2016. LBW and IUGR temporal trend in 4 population-based birth cohorts: the role of economic inequality. *BMC Pediatrics* 16:115.

Salvador, J., Cano-Serral, G., Rodríguez-Sanz, M., Lladonosa, A., Borrell, C., 2009. Inequalities in caesarean section: influence of the type of maternity care and social class in an area with a national health system. *Journal of Epidemiology & Community Health* 63:259-61.

Saurel-Cubizolles, M.J., Zeitlin, J., Lelong, N., Papiernik, E., Di Renzo, G.C., Bréart, G., 2004. Employment, working conditions, and preterm birth: results from the Europop case-control survey. *Journal of Epidemiology & Community Health* 58:395-401.

Savitz, D.A., Kaufman, J.S., Dole, N., Siega-Riz, A.M., Thorp, J.M., Kaczor, D.T., 2004. Poverty, education, race, and pregnancy outcome. *Ethnicity & Disease* 14:322-29.

Scharber, H., 2014. Policy brief. Do unemployed women give birth to infants with higher rates of infant mortality and low birthweight? *Journal of Health & Social Behavior* 55:265.

Schechtman, K.B., Gray, D.L., Baty, J.D., Rothman, S.M., 2002. Decision-making for termination of pregnancies with fetal anomalies: Analysis of 53,000 pregnancies. *Obstetrics and Gynecology* 99:216-22.

Segre, L.S., O'Hara, M.W., Arndt, S., Stuart, S., 2007. The prevalence of postpartum depression. *Social Psychiatry and Psychiatric Epidemiology* 42:316-21.

Sellstrom, E., Arnoldsson, G., Bremberg, S., Hjern, A., 2007. Are there differences in birth weight between neighbourhoods in a Nordic welfare state? *BMC Public Health* 7 (no pagination).

|  |                                                                                                                                                                                                                                                                                                                                                                                                                                                                                                                                                                                                                                                                                                                                                                                                                                                                                                                                                                                                                                                                                                                                                                                                                                                                                                                                                                                                                                                                                                                                                                                                                                                                                                                                                                                                                                                                                                                                                                                                                                                                                                                                                                                                                                                                                                                                                                                                                                                                                                                                                                                                                                                                                                                                                                                                                                                                                                                                                                                                                                                                                                                                                                                                                                                                                                                                                                                                                                                                                                                                                                                                                                                                                                                                                                                                                                                                                                                                                                                                                                                                                                                                                                                                                                                                                                                                                                                                                                                                                                                                                                                                                                                                                                                                                                                                                                                                                                                                                                                                                                                                                                                                                                                                                                                                                                                                                                                                                                                                                                                                                                                                                                                                                                                                                                                                                                                                                                                                                                                                                                                                                                                                                                                                                                                                                                                                                                                                                                                                                                                                                                                                                                                                                                                                                                                                                                                                                                                                                                                                                                                                                                                                                                                                                                                                                                                                                                                                                                                                                                                                                                                                                                                                                                                                                                                                                                                                                                                                                                                                                                                                                                                                                                                                                                                                                                                                                                                                                                                                                            |
|--|--------------------------------------------------------------------------------------------------------------------------------------------------------------------------------------------------------------------------------------------------------------------------------------------------------------------------------------------------------------------------------------------------------------------------------------------------------------------------------------------------------------------------------------------------------------------------------------------------------------------------------------------------------------------------------------------------------------------------------------------------------------------------------------------------------------------------------------------------------------------------------------------------------------------------------------------------------------------------------------------------------------------------------------------------------------------------------------------------------------------------------------------------------------------------------------------------------------------------------------------------------------------------------------------------------------------------------------------------------------------------------------------------------------------------------------------------------------------------------------------------------------------------------------------------------------------------------------------------------------------------------------------------------------------------------------------------------------------------------------------------------------------------------------------------------------------------------------------------------------------------------------------------------------------------------------------------------------------------------------------------------------------------------------------------------------------------------------------------------------------------------------------------------------------------------------------------------------------------------------------------------------------------------------------------------------------------------------------------------------------------------------------------------------------------------------------------------------------------------------------------------------------------------------------------------------------------------------------------------------------------------------------------------------------------------------------------------------------------------------------------------------------------------------------------------------------------------------------------------------------------------------------------------------------------------------------------------------------------------------------------------------------------------------------------------------------------------------------------------------------------------------------------------------------------------------------------------------------------------------------------------------------------------------------------------------------------------------------------------------------------------------------------------------------------------------------------------------------------------------------------------------------------------------------------------------------------------------------------------------------------------------------------------------------------------------------------------------------------------------------------------------------------------------------------------------------------------------------------------------------------------------------------------------------------------------------------------------------------------------------------------------------------------------------------------------------------------------------------------------------------------------------------------------------------------------------------------------------------------------------------------------------------------------------------------------------------------------------------------------------------------------------------------------------------------------------------------------------------------------------------------------------------------------------------------------------------------------------------------------------------------------------------------------------------------------------------------------------------------------------------------------------------------------------------------------------------------------------------------------------------------------------------------------------------------------------------------------------------------------------------------------------------------------------------------------------------------------------------------------------------------------------------------------------------------------------------------------------------------------------------------------------------------------------------------------------------------------------------------------------------------------------------------------------------------------------------------------------------------------------------------------------------------------------------------------------------------------------------------------------------------------------------------------------------------------------------------------------------------------------------------------------------------------------------------------------------------------------------------------------------------------------------------------------------------------------------------------------------------------------------------------------------------------------------------------------------------------------------------------------------------------------------------------------------------------------------------------------------------------------------------------------------------------------------------------------------------------------------------------------------------------------------------------------------------------------------------------------------------------------------------------------------------------------------------------------------------------------------------------------------------------------------------------------------------------------------------------------------------------------------------------------------------------------------------------------------------------------------------------------------------------------------------------------------------------------------------------------------------------------------------------------------------------------------------------------------------------------------------------------------------------------------------------------------------------------------------------------------------------------------------------------------------------------------------------------------------------------------------------------------------------------------------------------------------------------------------------------------------------------------------------------------------------------------------------------------------------------------------------------------------------------------------------------------------------------------------------------------------------------------------------------------------------------------------------------------------------------------------------------------------------------------------------------------------------------------------------------------------------------------------------------------------------------------------------------------------------------------------------------------------------------------------------------------------------------------------------------------------------------------------------------------------------------------------------------------------------------------------------------------------------------------------------------------------------------------------------------------------------------|
|  | <p>Shah, P.E., Clements, M., Poehlmann, J., 2011. Maternal resolution of grief after preterm birth: Implications for infant attachment security. <i>Pediatrics</i> 127:284-92.</p> <p>Shankaran, S., Lin, A., Maller-Kesselman, J., Zhang, H., O'Shea, T.M., Bada, H.S., Kaiser, J.R., Lifton, R.P., Bauer, C.R., et al., 2014. Maternal race, demography, and health care disparities impact risk for intraventricular hemorrhage in preterm neonates. <i>Journal of Pediatrics</i> 164:1005-11.e3.</p> <p>Sheiner, E., Shoham-Vardi, I., Hadar, A., Hallak, M., Hackmon, R., Mazor, M., 2002. Incidence, obstetric risk factors and pregnancy outcome of preterm placental abruption: a retrospective analysis. <i>The Journal of Maternal-Fetal &amp; Neonatal Medicine</i> 11:34-39.</p> <p>Sheldon, W.R., Blum, J., Vogel, J.P., Souza, J.P., Gulmezoglu, A.M., Winikoff, B., 2014. Postpartum haemorrhage management, risks, and maternal outcomes: findings from the World Health Organization Multicountry Survey on Maternal and Newborn Health. <i>BJOG</i> 121:5.</p> <p>Siahanidou, T., Dessypris, N., Analitis, A., Mihas, C., Evangelou, E., Chrousos, G., Petridou, E., 2019. Disparities of infant and neonatal mortality trends in Greece during the years of economic crisis by ethnicity, place of residence and human development index: a nationwide population study. <i>BMJ Open</i> 9:e025287.</p> <p>Silva, L.M., Coolman, M., Steegers, E.A.P., Jaddoe, V.W.V., Moll, H.A., Hofman, A., Mackenbach, J.P., Raat, H., 2008a. Low socioeconomic status is a risk factor for preeclampsia: The Generation R Study. <i>Journal of Hypertension</i> 26:1200-08.</p> <p>Silva, L.M., Coolman, M., Steegers, E.A.P., Jaddoe, V.W.V., Moll, H.A., Hofman, A., Mackenbach, J.P., Raat, H., 2008b. Maternal educational level and risk of gestational hypertension: The Generation R Study. <i>Journal of Human Hypertension</i> 22:483-92.</p> <p>Silva, L.M., Jansen, P.W., Steegers, E.A.P., Jaddoe, V.W.V., Arends, L.R., Tiemeier, H., Verhulst, F.C., Moll, H.A., Hofman, A., et al., 2010. Mother's educational level and fetal growth: The genesis of health inequalities. <i>International Journal of Epidemiology</i> 39:1250-61.</p> <p>Simhan, H.N., Krohn, M.A., 2009. First-trimester cervical inflammatory milieu and subsequent early preterm birth. <i>American Journal of Obstetrics and Gynecology</i> 200:377.e1-77.e4.</p> <p>Singnoi, W., Wanapirak, C., Sekararithi, R., Tongsong, T., 2019. A cohort study of the association between maternal serum Inhibin-A and adverse pregnancy outcomes: A population-based study. <i>BMC Pregnancy and Childbirth</i> 19 (1) (no pagination).</p> <p>Siwach, M., 2009. Birth weight of neonates in relation to socio economic profile of families. <i>Journal of Dairying Foods &amp; Home Sciences</i> 28.</p> <p>Slama, R., Morgestern, V., Cyrys, J., Zutavern, A., Herbarth, O., Wichmann, H.E., Heinrich, J., 2007. Traffic-related atmospheric pollutants levels during pregnancy and offspring's term birth weight: A study relying on a land-use regression exposure model. <i>Environmental Health Perspectives</i> 115:1283-92.</p> <p>Snijder, C.A., Brand, T., Jaddoe, V., Hofman, A., Mackenbach, J.P., Steegers, E.A., Burdorf, A., 2012. Physically demanding work, fetal growth and the risk of adverse birth outcomes. The Generation R Study. <i>Occupational &amp; Environmental Medicine</i> 69:543-50.</p> <p>Sourila, D., Alikari, V., Prezerakos, P., Tsironi, M., Zyga, S., 2015. Frequency of breastfeeding in postpartum women and related factors. <i>Archives of Hellenic Medicine</i> 32:484-91.</p> <p>Souza, M.A.C.d., 2015. Fatores determinantes da near miss materna em uma unidade de terapia intensiva obstétrica: avaliação das competências profissionais da área médica. Universidade Federal do Rio Grande do Norte.</p> <p>Sow, M., Racape, J., Schoenborn, C., De Spiegelaere, M., 2018. Is the socioeconomic status of immigrant mothers in Brussels relevant to predict their risk of adverse pregnancy outcomes? <i>BMC Pregnancy and Childbirth</i> 18 (1) (no pagination).</p> <p>Sparks, T.N., Yeaton-Massey, A., Granados, J.M., Handler, S.J., Meyer, M.R., Caughey, A.B., 2015. Preference toward future mode of delivery: How do antepartum preferences and prior delivery experience contribute? <i>Journal of Maternal-Fetal and Neonatal Medicine</i> 28:1673-78.</p> <p>Spencer, N., 2004. Accounting for the social disparity in birth weight: Results from an intergenerational cohort. <i>Journal of Epidemiology and Community Health</i> 58:418-19.</p> <p>Stafford, R.S., 1991. The impact of nonclinical factors on repeat cesarean section. <i>JAMA</i> 265:59-63.</p> <p>Starfield, B., Shapiro, S., Weiss, J., Liang, K.-Y., Ra, K., Paige, D., Wang, X., 1991. Race, family income, and low birth weight. <i>American Journal of Epidemiology</i> 134:1167-74.</p> <p>Starling, A.P., Engel, S.M., Richardson, D.B., Baird, D.D., Haug, L.S., Stuebe, A.M., Klungsoyr, K., Harmon, Q., Becher, G., et al., 2014. Perfluoroalkyl substances during pregnancy and validated preeclampsia among nulliparous women in the norwegian mother and child cohort study. <i>American Journal of Epidemiology</i> 179:824-33.</p> <p>Staynova, R., Gueorguiev, S., Petkova-Gueorguieva, E., Petleshkova, P., 2018. A comparative study on diabetes self-management in pregnant women with gestational diabetes and pre-existing diabetes. <i>Biomedical Research (India)</i> 29:3526-31.</p> <p>Straube, S., Voigt, M., Jorch, G., Hallier, E., Briese, V., Borchardt, U., 2010. Investigation of the association of Apgar score with maternal socio-economic and biological factors: An analysis of German perinatal statistics. <i>Archives of Gynecology and Obstetrics</i> 282:135-41.</p> <p>Stylianou-Riga, P., Kouis, P., Kinni, P., Rigas, A., Papadouri, T., Yiallourous, P.K., Theodorou, M., 2018. Maternal socioeconomic factors and the risk of premature birth and low birth weight in Cyprus: a case-control study. <i>Reproductive Health</i> 15:157.</p> <p>Sulima, M., Makara-Studzinska, M., Lewicka, M., Wiktor, K., Stawarz, B., Wiktor, H., 2014. Analysis of sociodemographic factors and obstetric situation in the context of the time of pregnancy completion with a preterm delivery. <i>Journal of Public Health, Nursing and Medical Rescue</i> 112:44-50.</p> <p>Sullivan, M.L., Leathers, S.J., Kelley, M.A., 2004. Family characteristics associated with duration of breastfeeding during early infancy among primiparas. <i>Journal of Human Lactation</i> 20:196-205.</p> <p>Sundquist, J., Sundquist, K., Johansson, S.E., Li, X., Winkleby, M., 2011. Mothers, places and small for gestational age births: a cohort study. <i>Archives of Disease in Childhood</i> 96:380-85.</p> <p>Teran, J.M., Varea, C., Juarez, S., Bernis, C., Bogin, B., 2018. Social disparities in low birth weight among Spanish mothers during the economic crisis (2007-2015). [Spanish]. <i>Nutricion Hospitalaria</i> 35:129-41.</p> <p>Thomas-Jackson, S.C., Bentley, G.E., Keyton, K., Reifman, A., Boylan, M., Hart, S.L., 2016. In-hospital Breastfeeding and Intention to Return to Work Influence Mothers' Breastfeeding Intentions. <i>Journal of Human Lactation</i> 32:NP76-NP83.</p> <p>Thompson, J.M.D., Irgens, L.M., Rasmussen, S., Daltveit, A.K., 2006. Secular trends in socio-economic status and the implications for preterm birth. <i>Paediatric and Perinatal Epidemiology</i> 20:182-87.</p> <p>Timmermans, S., Bonsel, G.J., Steegers-Theunissen, R.P.M., MacKenbach, J.P., Steyerberg, E.W., Raat, H., Verbrugh, H.A., Tiemeier, H.W., Hofman, A., et al., 2011. Individual accumulation of heterogeneous risks explains perinatal inequalities within deprived neighbourhoods. <i>European Journal of Epidemiology</i> 26:165-80.</p> <p>Tinloy, J., Chuang, C.H., Zhu, J., Pauli, J., Kraschewski, J.L., Kjerulff, K.H., 2014. Exercise during Pregnancy and Risk of Late Preterm Birth, Cesarean Delivery, and Hospitalizations. <i>Women's Health Issues</i> 24:e99-e104.</p> <p>Tollanes, M.C., Thompson, J.M., Daltveit, A.K., Irgens, L.M., 2007. Cesarean section and maternal education; secular trends in Norway, 1967-2004. <i>Acta Obstetrica et Gynecologica Scandinavica</i> 86:840-8.</p> |
|--|--------------------------------------------------------------------------------------------------------------------------------------------------------------------------------------------------------------------------------------------------------------------------------------------------------------------------------------------------------------------------------------------------------------------------------------------------------------------------------------------------------------------------------------------------------------------------------------------------------------------------------------------------------------------------------------------------------------------------------------------------------------------------------------------------------------------------------------------------------------------------------------------------------------------------------------------------------------------------------------------------------------------------------------------------------------------------------------------------------------------------------------------------------------------------------------------------------------------------------------------------------------------------------------------------------------------------------------------------------------------------------------------------------------------------------------------------------------------------------------------------------------------------------------------------------------------------------------------------------------------------------------------------------------------------------------------------------------------------------------------------------------------------------------------------------------------------------------------------------------------------------------------------------------------------------------------------------------------------------------------------------------------------------------------------------------------------------------------------------------------------------------------------------------------------------------------------------------------------------------------------------------------------------------------------------------------------------------------------------------------------------------------------------------------------------------------------------------------------------------------------------------------------------------------------------------------------------------------------------------------------------------------------------------------------------------------------------------------------------------------------------------------------------------------------------------------------------------------------------------------------------------------------------------------------------------------------------------------------------------------------------------------------------------------------------------------------------------------------------------------------------------------------------------------------------------------------------------------------------------------------------------------------------------------------------------------------------------------------------------------------------------------------------------------------------------------------------------------------------------------------------------------------------------------------------------------------------------------------------------------------------------------------------------------------------------------------------------------------------------------------------------------------------------------------------------------------------------------------------------------------------------------------------------------------------------------------------------------------------------------------------------------------------------------------------------------------------------------------------------------------------------------------------------------------------------------------------------------------------------------------------------------------------------------------------------------------------------------------------------------------------------------------------------------------------------------------------------------------------------------------------------------------------------------------------------------------------------------------------------------------------------------------------------------------------------------------------------------------------------------------------------------------------------------------------------------------------------------------------------------------------------------------------------------------------------------------------------------------------------------------------------------------------------------------------------------------------------------------------------------------------------------------------------------------------------------------------------------------------------------------------------------------------------------------------------------------------------------------------------------------------------------------------------------------------------------------------------------------------------------------------------------------------------------------------------------------------------------------------------------------------------------------------------------------------------------------------------------------------------------------------------------------------------------------------------------------------------------------------------------------------------------------------------------------------------------------------------------------------------------------------------------------------------------------------------------------------------------------------------------------------------------------------------------------------------------------------------------------------------------------------------------------------------------------------------------------------------------------------------------------------------------------------------------------------------------------------------------------------------------------------------------------------------------------------------------------------------------------------------------------------------------------------------------------------------------------------------------------------------------------------------------------------------------------------------------------------------------------------------------------------------------------------------------------------------------------------------------------------------------------------------------------------------------------------------------------------------------------------------------------------------------------------------------------------------------------------------------------------------------------------------------------------------------------------------------------------------------------------------------------------------------------------------------------------------------------------------------------------------------------------------------------------------------------------------------------------------------------------------------------------------------------------------------------------------------------------------------------------------------------------------------------------------------------------------------------------------------------------------------------------------------------------------------------------------------------------------------------------------------------------------------------------------------------------------------------------------------------------------------------------------------------------------------------------------------------------------------------------------------------------------------------------------------------------------------------------------------------------------------------------------------------------------------------------------------------------------------------------------------|

|  |                                                                                                                                                                                                                                                                                                                                                                                                                                                                                                                                                                                                                                                                                                                                                                                                                                                                                                                                                                                                                                                                                                                                                                                                                                                                                                                                                                                                                                                                                                                                                                                                                                                                                                                                                                                                                                                                                                                                                                                                                                                                                                                                                                                                                                                                                                                                                                                                                                                                                                                                                                                                                                                                                                                                                                                                                                                                                                                                                                                                                                                                                                                                                                                                                                                                                                                                                                                                                                                                                                                                                                                                                                                                                                                                                                                                                                                                                                                                                                                                                                                                                                                                                                                                                                                                                                                                                                                                                                                                                                                                                                                                                                                                                                                                                                                                                                                                                                                                                                                                                                                                                                                                                                                                                                                                                                                                                                                                                                                                                                                                                                                                                                                                                                                                                                                                                                                                                                                                                                                                                                                                                                                                                                                                                                                                                                                                                                                                                                                                                                                                                                                                                                                                                                                                                                                                                                                                                                                                                                                                                                                                                                                                                                                                                                                                                                                                                                                                                                                                                                                                                                                                                                                                                                                                                                                                                                                                                                                                                                                                                                                                                               |
|--|-----------------------------------------------------------------------------------------------------------------------------------------------------------------------------------------------------------------------------------------------------------------------------------------------------------------------------------------------------------------------------------------------------------------------------------------------------------------------------------------------------------------------------------------------------------------------------------------------------------------------------------------------------------------------------------------------------------------------------------------------------------------------------------------------------------------------------------------------------------------------------------------------------------------------------------------------------------------------------------------------------------------------------------------------------------------------------------------------------------------------------------------------------------------------------------------------------------------------------------------------------------------------------------------------------------------------------------------------------------------------------------------------------------------------------------------------------------------------------------------------------------------------------------------------------------------------------------------------------------------------------------------------------------------------------------------------------------------------------------------------------------------------------------------------------------------------------------------------------------------------------------------------------------------------------------------------------------------------------------------------------------------------------------------------------------------------------------------------------------------------------------------------------------------------------------------------------------------------------------------------------------------------------------------------------------------------------------------------------------------------------------------------------------------------------------------------------------------------------------------------------------------------------------------------------------------------------------------------------------------------------------------------------------------------------------------------------------------------------------------------------------------------------------------------------------------------------------------------------------------------------------------------------------------------------------------------------------------------------------------------------------------------------------------------------------------------------------------------------------------------------------------------------------------------------------------------------------------------------------------------------------------------------------------------------------------------------------------------------------------------------------------------------------------------------------------------------------------------------------------------------------------------------------------------------------------------------------------------------------------------------------------------------------------------------------------------------------------------------------------------------------------------------------------------------------------------------------------------------------------------------------------------------------------------------------------------------------------------------------------------------------------------------------------------------------------------------------------------------------------------------------------------------------------------------------------------------------------------------------------------------------------------------------------------------------------------------------------------------------------------------------------------------------------------------------------------------------------------------------------------------------------------------------------------------------------------------------------------------------------------------------------------------------------------------------------------------------------------------------------------------------------------------------------------------------------------------------------------------------------------------------------------------------------------------------------------------------------------------------------------------------------------------------------------------------------------------------------------------------------------------------------------------------------------------------------------------------------------------------------------------------------------------------------------------------------------------------------------------------------------------------------------------------------------------------------------------------------------------------------------------------------------------------------------------------------------------------------------------------------------------------------------------------------------------------------------------------------------------------------------------------------------------------------------------------------------------------------------------------------------------------------------------------------------------------------------------------------------------------------------------------------------------------------------------------------------------------------------------------------------------------------------------------------------------------------------------------------------------------------------------------------------------------------------------------------------------------------------------------------------------------------------------------------------------------------------------------------------------------------------------------------------------------------------------------------------------------------------------------------------------------------------------------------------------------------------------------------------------------------------------------------------------------------------------------------------------------------------------------------------------------------------------------------------------------------------------------------------------------------------------------------------------------------------------------------------------------------------------------------------------------------------------------------------------------------------------------------------------------------------------------------------------------------------------------------------------------------------------------------------------------------------------------------------------------------------------------------------------------------------------------------------------------------------------------------------------------------------------------------------------------------------------------------------------------------------------------------------------------------------------------------------------------------------------------------------------------------------------------------------------------------------------------------------------------------------------------------------------------------------------------------------------------------------------------------------------------------------|
|  | <p>Tong, V.T., England, L.J., Rockhill, K.M., D'Angelo, D.V., 2017. Risks of Preterm Delivery and Small for Gestational Age Infants: Effects of Nondaily and Low-Intensity Daily Smoking During Pregnancy. <i>Paediatric and Perinatal Epidemiology</i> 31:144-48.</p> <p>Too, G., Wen, T., Boehme, A.K., Miller, E.C., Leffert, L.R., Attenello, F.J., Mack, W.J., D'Alton, M.E., Friedman, A.M., 2018. Timing and risk factors of postpartum stroke. <i>Obstetrics and Gynecology</i> 131:70.</p> <p>Tsimbos, C., Verropoulou, G., 2011. Demographic and socioeconomic determinants of low birth weight and preterm births among natives and immigrants in Greece: an analysis using nationwide vital registration micro-data. <i>Journal of Biosocial Science</i> 43:271-83.</p> <p>Upadhyaya, S.K., Sharma, A., Raval, C.M., 2014. Postpartum psychosis: Risk factors identification. <i>North American Journal of Medical Sciences</i> 6:35-38.</p> <p>Vahratian, A., Buekens, P., Delvaux, T., Boutsen, M., Wang, Y., Kupper, L.L., 2004. Birthweight differences among infants of North African immigrants and Belgians in Belgium. <i>European Journal of Public Health</i> 14:381-83.</p> <p>Väisänen, H., 2018. Does the association between teen births or abortions and educational attainment vary by socioeconomic background in finland? <i>Longitudinal and Life Course Studies</i> 9:245-56.</p> <p>Van den Berg, G., van Eijsden, M., Galindo-Garre, F., Vrijkotte, T.G.M., Gemke, R.J.B.J., 2013. Smoking overrules many other risk factors for small for gestational age birth in less educated mothers. <i>Early Human Development</i> 89:497-501.</p> <p>van den Berg, G., van Eijsden, M., Vrijkotte, T.G.M., Gemke, R.J.B.J., 2012. Educational inequalities in perinatal outcomes: The mediating effect of smoking and environmental tobacco exposure. <i>PLoS One</i> 7 (5) (no pagination).</p> <p>van Rossem, L., Oenema, A., Steegers, E.A.P., Moll, H.A., Jaddoe, V.W.V., Hofman, A., Mackenbach, J.P., Raat, H., 2009. Are starting and continuing breastfeeding related to educational background? The Generation R Study. <i>Pediatrics</i> 123:e1017-27.</p> <p>Varea, C., Teran, J.M., Bernis, C., Bogin, B., Gonzalez-Gonzalez, A., 2016. Is the economic crisis affecting birth outcome in Spain? Evaluation of temporal trend in underweight at birth (2003-2012). <i>Annals of Human Biology</i> 43:169-82.</p> <p>Varela, M.M., Nohr, E.A., Llopis-González, A., Andersen, A.M., Olsen, J., 2009. Socio-occupational status and congenital anomalies. <i>European Journal of Public Health</i> 19:161-67.</p> <p>Vassilaki, M., Chatzi, L., Rasidaki, M., Bagkeris, E., Kritsotakis, G., Roumeliotaki, T., Koutis, A., Philalithis, A., Kogevinas, M., 2014. Caesarean deliveries in the mother-child (Rhea) cohort in Crete, Greece: Almost as frequent as vaginal births and even more common in first-time mothers. <i>Hippokratia</i> 18:298-305.</p> <p>Verropoulou, G., Tsimbos, C., 2013. Modelling the effects of maternal socio-demographic characteristics on the preterm and term birth weight distributions in Greece using quantile regression. <i>Journal of Biosocial Science</i> 45:375-90.</p> <p>Vieira, A.C.F., Alves, C.M.C., Rodrigues, V.P., Ribeiro, C.C.C., Gomes-Filho, I.S., Lopes, F.F., 2019. Oral, systemic and socioeconomic factors associated with preterm birth. <i>Women &amp; Birth</i> 32:e12-e16.</p> <p>Viera, C.S., de Oliveira, B.R.G., Fiewski, M.F.C., Caldeira, S., 2012. Epidemiological profile of the mother-infant dyads hospitalized in obstetric rooming of a university hospital for treatment of neonatal hyperbilirubinemia. <i>Acta Scientiarum - Health Sciences</i> 34:103-12.</p> <p>Villalbi, J.R., Salvador, J., Cano-Serral, G., Rodriguez-Sanz, M.C., Borrell, C., 2007. Maternal smoking, social class and outcomes of pregnancy. <i>Paediatric and Perinatal Epidemiology</i> 21:441-47.</p> <p>Vrijkotte, T.G., van der Wal, M.F., van Eijsden, M., Bonsel, G.J., 2009. First-trimester working conditions and birthweight: a prospective cohort study. <i>American Journal of Public Health</i> 99:1409-16.</p> <p>Wadhwa, P.D., Garite, T.J., Porto, M., Glynn, L., Chiciz-DeMet, A., Dunkel-Schetter, C., Sandman, C.A., 2004. Placental corticotropin-releasing hormone (CRH), spontaneous preterm birth, and fetal growth restriction: a prospective investigation. <i>American Journal of Obstetrics and Gynecology</i> 191:1063-69.</p> <p>Waldenstrom, U., Cnattingius, S., Vixner, L., Norman, M., 2017. Advanced maternal age increases the risk of very preterm birth, irrespective of parity: a population-based register study. <i>BJOG: An International Journal of Obstetrics and Gynaecology</i> 124:1235-44.</p> <p>Walfisch, A., Brown, R., Mallozzi, A., Hallak, M., Shrim, A., 2016. Maternal characteristics of pregnancies with intrauterine fetal demise. <i>Journal of Perinatal Medicine</i> 44:779-84.</p> <p>Weichert, A., Weichert, T.M., Bergmann, R.L., Henrich, W., Kalache, K.D., Richter, R., Neymeyer, J., Bergmann, K.E., 2015. Factors for Preterm Births in Germany - An Analysis of Representative German Data (KiGGS). <i>Geburtshilfe und Frauenheilkunde</i> 75:819-26.</p> <p>Whelan, E.A., Lawson, C.C., Grajewski, B., Hibert, E.N., Spiegelman, D., Rich-Edwards, J.W., 2007. Work schedule during pregnancy and spontaneous abortion. <i>Epidemiology</i> 18:350-55.</p> <p>Whitaker, K.M., Ingram, K.H., Appiah, D., Nicholson, W.K., Bennett, W.L., Lewis, C.E., Reis, J.P., Schreiner, P.J., Gunderson, E.P., 2018. Prepregnancy Fitness and Risk of Gestational Diabetes: A Longitudinal Analysis. <i>Medicine &amp; Science in Sports &amp; Exercise</i> 50:1613-19.</p> <p>Whitehead, N.S., 2012. The relationship of socioeconomic status to preterm contractions and preterm delivery. <i>Maternal and Child Health Journal</i> 16:1645-56.</p> <p>Wisner, K.L., Sit, D., O'Shea, K., Bogen, D.L., Clark, C.T., Pinheiro, E., Yang, A., Ciolino, J.D., 2019. Bipolar disorder and psychotropic medication: Impact on pregnancy and neonatal outcomes. <i>Journal of Affective Disorders</i> 243:220-25.</p> <p>Wong, L.F., Wilkes, J., Korgenski, K., Varner, M.W., Manuck, T.A., 2016. Risk factors associated with preterm birth after a prior term delivery. <i>BJOG</i> 123:1772.</p> <p>Wu, M., Li, X., Feng, B., Wu, H., Qiu, C., Zhang, W., 2014. Poor sleep quality of third-trimester pregnancy is a risk factor for postpartum depression. <i>Medical Science Monitor</i> 20:2740-45.</p> <p>Xu, F., Du, X., Xie, L., 2015. Vaginitis in pregnancy is related to adverse perinatal outcome. <i>Pakistan Journal of Medical Sciences</i> 31:582-86.</p> <p>Yilmaz, Z., Sahin, F.I., Bulakbasi, T., Yuregir, O.O., Tarim, E., Yanik, F., 2008. Ethical considerations regarding parental decisions for termination following prenatal diagnosis of sex chromosome abnormalities. <i>Genetic Counseling</i> 19:345-52.</p> <p>Young, R.L., Weinberg, J., Vieira, V., Aschengrau, A., Webster, T.F., 2010. A multilevel non-hierarchical study of birth weight and socioeconomic status. <i>International Journal of Health Geographics</i> 9:36.</p> <p>Yu, Y., Liew, Z., Wang, A., Arah, O.A., Olsen, J., Cnattingius, S., Qin, G., Obel, C., Fu, B., et al., 2019. Mediating roles of preterm birth and restricted fetal growth in the relationship between maternal education and infant mortality: A Danish population-based cohort study. <i>PLoS Medicine</i> 16:e1002831.</p> <p>Zhu, J.L., Hjollund, N.H., Olsen, J., National Birth Cohort in, D., 2004. Shift work, duration of pregnancy, and birth weight: the National Birth Cohort in Denmark. <i>American Journal of Obstetrics &amp; Gynecology</i> 191:285-91.</p> <p>Zylbersztejn, A., Gilbert, R., Hjern, A., Wijlaars, L., Hardelid, P., 2018. Child mortality in England compared with Sweden: a birth cohort study. <i>The Lancet</i> 391:2008.</p> |
|--|-----------------------------------------------------------------------------------------------------------------------------------------------------------------------------------------------------------------------------------------------------------------------------------------------------------------------------------------------------------------------------------------------------------------------------------------------------------------------------------------------------------------------------------------------------------------------------------------------------------------------------------------------------------------------------------------------------------------------------------------------------------------------------------------------------------------------------------------------------------------------------------------------------------------------------------------------------------------------------------------------------------------------------------------------------------------------------------------------------------------------------------------------------------------------------------------------------------------------------------------------------------------------------------------------------------------------------------------------------------------------------------------------------------------------------------------------------------------------------------------------------------------------------------------------------------------------------------------------------------------------------------------------------------------------------------------------------------------------------------------------------------------------------------------------------------------------------------------------------------------------------------------------------------------------------------------------------------------------------------------------------------------------------------------------------------------------------------------------------------------------------------------------------------------------------------------------------------------------------------------------------------------------------------------------------------------------------------------------------------------------------------------------------------------------------------------------------------------------------------------------------------------------------------------------------------------------------------------------------------------------------------------------------------------------------------------------------------------------------------------------------------------------------------------------------------------------------------------------------------------------------------------------------------------------------------------------------------------------------------------------------------------------------------------------------------------------------------------------------------------------------------------------------------------------------------------------------------------------------------------------------------------------------------------------------------------------------------------------------------------------------------------------------------------------------------------------------------------------------------------------------------------------------------------------------------------------------------------------------------------------------------------------------------------------------------------------------------------------------------------------------------------------------------------------------------------------------------------------------------------------------------------------------------------------------------------------------------------------------------------------------------------------------------------------------------------------------------------------------------------------------------------------------------------------------------------------------------------------------------------------------------------------------------------------------------------------------------------------------------------------------------------------------------------------------------------------------------------------------------------------------------------------------------------------------------------------------------------------------------------------------------------------------------------------------------------------------------------------------------------------------------------------------------------------------------------------------------------------------------------------------------------------------------------------------------------------------------------------------------------------------------------------------------------------------------------------------------------------------------------------------------------------------------------------------------------------------------------------------------------------------------------------------------------------------------------------------------------------------------------------------------------------------------------------------------------------------------------------------------------------------------------------------------------------------------------------------------------------------------------------------------------------------------------------------------------------------------------------------------------------------------------------------------------------------------------------------------------------------------------------------------------------------------------------------------------------------------------------------------------------------------------------------------------------------------------------------------------------------------------------------------------------------------------------------------------------------------------------------------------------------------------------------------------------------------------------------------------------------------------------------------------------------------------------------------------------------------------------------------------------------------------------------------------------------------------------------------------------------------------------------------------------------------------------------------------------------------------------------------------------------------------------------------------------------------------------------------------------------------------------------------------------------------------------------------------------------------------------------------------------------------------------------------------------------------------------------------------------------------------------------------------------------------------------------------------------------------------------------------------------------------------------------------------------------------------------------------------------------------------------------------------------------------------------------------------------------------------------------------------------------------------------------------------------------------------------------------------------------------------------------------------------------------------------------------------------------------------------------------------------------------------------------------------------------------------------------------------------------------------------------------------------------------------------------------------------------------------------------------------------------------------------------------------------------------------------------------------------|

|                                                   |                                                                                                                                                                                                                                                                                                                                                                                                                                                                                                                                                                                                                                                                                                                                                                                                                                                                                                                                                                                                                                                                                                                                                                                                                                                                                                                                                                                                                                                                                                                                                                                                                                                                                                                                                                                                                                                                                                                                                                                                                                                                                                                                                                                                                                                                                                                                                                                                                                                                                                                                                                                                                                                                                                                                                                                                                                                                                                                                                                                                                                                                                                                                                                                                                                                                                                                                                                                                                                                                                                                                                                                                                                                                                                                                                                                                                                                                                                                                                                                                                                                                                                                                                                                                                                                                                                                                                                                                                                                                                                                                                                                                                                                                                                                                                                                                                                                                                                                                                                                                                                                                                                                                                                                                                                                                                                                                                                                                                                                                                                                                                                                                                                                                                                                                                                                                                                                                                                                                                                                                                                                                                                                                                                                                                                                                                                                                                                                                                                                                                                                                                                                                                                                                                                                                                                                                                                                                                                                                                                                                                                                                                                                                                                                                                                                                                                                                                                                                                                                                                                                                                                                                                                                                                                                                                                                                                                                                                                                                                                                                                                                                                                                                                                                                                                                                                                                                                                                                                                                                                                                                                                                                                                                                                                                                                                       |
|---------------------------------------------------|-----------------------------------------------------------------------------------------------------------------------------------------------------------------------------------------------------------------------------------------------------------------------------------------------------------------------------------------------------------------------------------------------------------------------------------------------------------------------------------------------------------------------------------------------------------------------------------------------------------------------------------------------------------------------------------------------------------------------------------------------------------------------------------------------------------------------------------------------------------------------------------------------------------------------------------------------------------------------------------------------------------------------------------------------------------------------------------------------------------------------------------------------------------------------------------------------------------------------------------------------------------------------------------------------------------------------------------------------------------------------------------------------------------------------------------------------------------------------------------------------------------------------------------------------------------------------------------------------------------------------------------------------------------------------------------------------------------------------------------------------------------------------------------------------------------------------------------------------------------------------------------------------------------------------------------------------------------------------------------------------------------------------------------------------------------------------------------------------------------------------------------------------------------------------------------------------------------------------------------------------------------------------------------------------------------------------------------------------------------------------------------------------------------------------------------------------------------------------------------------------------------------------------------------------------------------------------------------------------------------------------------------------------------------------------------------------------------------------------------------------------------------------------------------------------------------------------------------------------------------------------------------------------------------------------------------------------------------------------------------------------------------------------------------------------------------------------------------------------------------------------------------------------------------------------------------------------------------------------------------------------------------------------------------------------------------------------------------------------------------------------------------------------------------------------------------------------------------------------------------------------------------------------------------------------------------------------------------------------------------------------------------------------------------------------------------------------------------------------------------------------------------------------------------------------------------------------------------------------------------------------------------------------------------------------------------------------------------------------------------------------------------------------------------------------------------------------------------------------------------------------------------------------------------------------------------------------------------------------------------------------------------------------------------------------------------------------------------------------------------------------------------------------------------------------------------------------------------------------------------------------------------------------------------------------------------------------------------------------------------------------------------------------------------------------------------------------------------------------------------------------------------------------------------------------------------------------------------------------------------------------------------------------------------------------------------------------------------------------------------------------------------------------------------------------------------------------------------------------------------------------------------------------------------------------------------------------------------------------------------------------------------------------------------------------------------------------------------------------------------------------------------------------------------------------------------------------------------------------------------------------------------------------------------------------------------------------------------------------------------------------------------------------------------------------------------------------------------------------------------------------------------------------------------------------------------------------------------------------------------------------------------------------------------------------------------------------------------------------------------------------------------------------------------------------------------------------------------------------------------------------------------------------------------------------------------------------------------------------------------------------------------------------------------------------------------------------------------------------------------------------------------------------------------------------------------------------------------------------------------------------------------------------------------------------------------------------------------------------------------------------------------------------------------------------------------------------------------------------------------------------------------------------------------------------------------------------------------------------------------------------------------------------------------------------------------------------------------------------------------------------------------------------------------------------------------------------------------------------------------------------------------------------------------------------------------------------------------------------------------------------------------------------------------------------------------------------------------------------------------------------------------------------------------------------------------------------------------------------------------------------------------------------------------------------------------------------------------------------------------------------------------------------------------------------------------------------------------------------------------------------------------------------------------------------------------------------------------------------------------------------------------------------------------------------------------------------------------------------------------------------------------------------------------------------------------------------------------------------------------------------------------------------------------------------------------------------------------------------------------------------------------------------------------------------------------------------------------------------------------------------------------------------------------------------------------------------------------------------------------------------------------------------------------------------------------------------------------------------------------------------------------------------------------------------------------------------------------------------------------------------------------------|
| <p>No deprivation indicators included (n=233)</p> | <p>Aasheim, V., Waldenström, U., Hjelmstedt, A., Rasmussen, S., Pettersson, H., Schytt, E., 2012. Associations between advanced maternal age and psychological distress in primiparous women, from early pregnancy to 18 months postpartum. <i>BJOG: An International Journal of Obstetrics &amp; Gynaecology</i> 119:1108-16.</p> <p>Acosta, C.D., Harrison, D.A., Rowan, K., Lucas, D.N., Kurinczuk, J.J., Knight, M., 2016. Maternal morbidity and mortality from severe sepsis: a national cohort study. <i>BMJ open</i> 6:e012323.</p> <p>Adamek, R., Klejewski, A., Urbaniak, T., Jagielska, J., Kaczmarek, E., 2007. Socio-economic determinants of smoking during pregnancy and birth weight of newborns. [Polish]. <i>Przegląd Lekarski</i> 64:622-25.</p> <p>Agay-Shay, K., Peled, A., Crespo, A.V., Peretz, C., Amitai, Y., Linn, S., Friger, M., Nieuwenhuijsen, M.J., 2014. Green spaces and adverse pregnancy outcomes. <i>Occupational and Environmental Medicine</i> 71:562-69.</p> <p>Ahmed, S.F., Dobbie, R., Finlayson, A.R., Gilbert, J., Youngson, G., Chalmers, J., Stone, D., 2004. Prevalence of hypospadias and other genital anomalies among singleton births, 1988-1997, in Scotland. <i>Archives of Disease in Childhood -- Fetal &amp; Neonatal Edition</i> 89:F149-51.</p> <p>Aite, L., Bevilacqua, F., Zaccara, A., Rava, L., Valfre, L., Conforti, A., Braguglia, A., Bagolan, P., 2014. Short-term neurodevelopmental outcome of babies operated on for low-risk esophageal atresia: A pilot study. <i>Diseases of the Esophagus</i> 27:330-34.</p> <p>Akman, I., Kuscu, M.K., Yurdakul, Z., Ozdemir, N., Solakoglu, M., Orhon, L., Karabekiroglu, A., Ozek, E., 2008. Breastfeeding duration and postpartum psychological adjustment: role of maternal attachment styles. <i>Journal of Paediatrics &amp; Child Health</i> 44:369-73.</p> <p>Akseer, N., Kamali, M., Husain, S., Mirza, M., Bakhache, N., Bhutta, Z.A., 2015. Strategies to avert preventable mortality among mothers and children in the eastern mediterranean region: New initiatives, new hope. <i>Eastern Mediterranean Health Journal</i> 21:361-73.</p> <p>Alamo-Junquera, D., Sunyer, J., Iniguez, C., Ballester, F., Garcia-Esteban, R., Forns, J., Turner, M.C., Lertxundi, A., Lertxundi, N., et al., 2015. Prenatal head growth and child neuropsychological development at age 14 months. <i>American Journal of Obstetrics and Gynecology</i> 212:661.e1-61.e11.</p> <p>Aliaga, A., Cunillera, O., Amador, M.D.C., Aliaga, M., Arquerons, M., Almeda, J., 2018. Association between affective disorders presenting before and during pregnancy and pre-term birth, considering socio-demographic factors, obstetric factors, health conditions, and use of medication. <i>Atencion Primaria</i>.</p> <p>Alwan, N.A., Greenwood, D.C., Simpson, N.A.B., McArdle, H.J., Godfrey, K.M., Cade, J.E., 2011. Dietary iron intake during early pregnancy and birth outcomes in a cohort of British women. <i>Human Reproduction</i> 26:911-19.</p> <p>Andersen, J.T., Petersen, M., Jimenez-Solem, E., Broedbaek, K., Andersen, E.W., Andersen, N.L., Afzal, S., Torp-Pedersen, C., Keiding, N., et al., 2013. Trimethoprim use in early pregnancy and the risk of miscarriage: A register-based nationwide cohort study. <i>Epidemiology and Infection</i> 141:1749-55.</p> <p>Andersson, E., Hildingsson, I., 2016. Mother's postnatal stress: an investigation of links to various factors during pregnancy and post-partum. <i>Scandinavian Journal of Caring Sciences</i> 30:782-89.</p> <p>Anselmo, J., Cao, D., Karrison, T., Weiss, R.E., Refetoff, S., Anselmo, J., Cao, D., Karrison, T., Weiss, R.E., et al., 2004. Fetal loss associated with excess thyroid hormone exposure. <i>JAMA: Journal of the American Medical Association</i> 292:691-95.</p> <p>Armstrong, B.G., Dolk, H., Pattenden, S., Vrijheid, M., Loane, M., Rankin, J., Dunn, C.E., Grundy, C., Abramsky, L., et al., 2007. Geographic variation and localised clustering of congenital anomalies in Great Britain. <i>Emerging Themes in Epidemiology</i> 4 (no pagination).</p> <p>Arvizu, M., Afeiche, M.C., Hansen, S., Halldorsson, T.F., Olsen, S.F., Chavarro, J.E., 2019. Fat intake during pregnancy and risk of preeclampsia: a prospective cohort study in Denmark. <i>European Journal of Clinical Nutrition</i> 73:1040-48.</p> <p>Astolfi, P., Zonta, L.A., 1999. Risks of preterm delivery and association with maternal age, birth order, and fetal gender. <i>Human Reproduction</i> 14:2891-4.</p> <p>Aszkenasy, M., Hutchison, S., 2000. Births, gestation and birthweights in South Tees 1990-1996. <i>Journal of Public Health Medicine</i> 22:457-61.</p> <p>Aveyard, P., Cheng, K.K., Manaseki, S., Gardosi, J., 2002. The risk of preterm delivery in women from different ethnic groups. <i>BJOG: An International Journal of Obstetrics and Gynaecology</i> 109:894-99.</p> <p>Aviezera, O., Sagi-Schwartz, A., Koren-Karie, N., 2003. Ecological constraints on the formation of infant-mother attachment relations: When maternal sensitivity becomes ineffective. <i>Infant Behavior &amp; Development</i> 26:285-99.</p> <p>Aviles, A., Neri, N., Nambo, M.J., 2012. Hematological malignancies and pregnancy: Treat or no treat during first trimester. <i>International Journal of Cancer</i> 131:2678-83.</p> <p>Axmon, A., Rylander, L., 2009. Birth weight and fetal growth in infants born to female hairdressers and their sisters. <i>Occupational &amp; Environmental Medicine</i> 66:198-204.</p> <p>Ayers, S., Jessop, D., Pike, A., Parfitt, Y., Ford, E., 2014. The role of adult attachment style, birth intervention and support in posttraumatic stress after childbirth: A prospective study. <i>Journal of Affective Disorders</i> 155:295-98.</p> <p>Bacci, S., Bartolucci, F., Chiavarini, M., Minelli, L., Pieroni, L., 2014. Differences in birthweight outcomes: A longitudinal study based on siblings. <i>International Journal of Environmental Research and Public Health</i> 11:6472-84.</p> <p>Bahadoer, S., Gaillard, R., Felix, J.F., Raat, H., Renders, C.M., Hofman, A., Steegers, E.A.P., Jaddoe, V.W.V., 2015. Ethnic disparities in maternal obesity and weight gain during pregnancy. The Generation R Study. <i>European Journal of Obstetrics and Gynecology and Reproductive Biology</i> 193:51-60.</p> <p>Baia, I., Amorim, M., Silva, S., Kelly-Irving, M., de Freitas, C., Alves, E., 2016. Parenting very preterm infants and stress in Neonatal Intensive Care Units. <i>Early Human Development</i> 101:03-Sep.</p> <p>Baines, T., Wittkowski, A., Wieck, A., 2013. Illness perceptions in mothers with postpartum depression. <i>Midwifery</i> 29:779-86.</p> <p>Bajos, N., Lamarche-Vadel, A., Gilbert, F., Ferrand, M., Moreau, C., Bouyer, J., Ducot, B., Hassoun, D., Goulard, H., et al., 2006. Contraception at the time of abortion: High-risk time or high-risk women? <i>Human Reproduction</i> 21:2862-67.</p> <p>Bakeo, A.C., 2004. Trends in live births by mother's country of birth and other factors affecting low birthweight in England and Wales, 1983-2001, in: <i>Statistics, O.f.N. (Ed.), Health Statistics Quarterly</i>, pp. 25-33.</p> <p>Baker, D., Garrow, A., Shiels, C., 2011. Inequalities in immunisation and breast feeding in an ethnically diverse urban area: cross-sectional study in Manchester, UK. <i>Journal of Epidemiology &amp; Community Health</i> 65:346-52.</p> <p>Bakolis, I., Kelly, R., Fecht, D., Best, N., Millett, C., Garwood, K., Elliott, P., Hansell, A.L., Hodgson, S., 2016. Protective Effects of Smoke-free Legislation on Birth Outcomes in England: A Regression Discontinuity Design. <i>Epidemiology</i> 27:810-18.</p> <p>Balazs, P., Fogarasi-Grenczer, A., Rakoczi, I., Foley, K.L., 2014. [Birth weight of Roma neonates: effect of biomedical and socioeconomic factors in Hungary]. <i>Orvosi Hetilap</i> 155:954-62.</p> <p>Bambang, S., Spencer, N., Logan, S., Gill, L., 2000. Cause-specific perinatal death rates, birth weight and deprivation in the West Midlands, 1991-1993. <i>Child: Care, Health and Development</i> 26:73-82.</p> <p>Ban, L., Gibson, J.E., West, J., Fiaschi, L., Oates, M.R., Tata, L.J., Ban, L., Gibson, J.E., West, J., et al., 2012. Impact of socioeconomic deprivation on maternal perinatal mental illnesses presenting to UK general practice. <i>British Journal of General Practice</i> 62:671-78.</p> <p>Banerjee, A., Begaj, I., Thorne, S., 2015. Aortic dissection in pregnancy in England: an incidence study using linked national databases. <i>BMJ open</i> 5:e008318.</p> |
|---------------------------------------------------|-----------------------------------------------------------------------------------------------------------------------------------------------------------------------------------------------------------------------------------------------------------------------------------------------------------------------------------------------------------------------------------------------------------------------------------------------------------------------------------------------------------------------------------------------------------------------------------------------------------------------------------------------------------------------------------------------------------------------------------------------------------------------------------------------------------------------------------------------------------------------------------------------------------------------------------------------------------------------------------------------------------------------------------------------------------------------------------------------------------------------------------------------------------------------------------------------------------------------------------------------------------------------------------------------------------------------------------------------------------------------------------------------------------------------------------------------------------------------------------------------------------------------------------------------------------------------------------------------------------------------------------------------------------------------------------------------------------------------------------------------------------------------------------------------------------------------------------------------------------------------------------------------------------------------------------------------------------------------------------------------------------------------------------------------------------------------------------------------------------------------------------------------------------------------------------------------------------------------------------------------------------------------------------------------------------------------------------------------------------------------------------------------------------------------------------------------------------------------------------------------------------------------------------------------------------------------------------------------------------------------------------------------------------------------------------------------------------------------------------------------------------------------------------------------------------------------------------------------------------------------------------------------------------------------------------------------------------------------------------------------------------------------------------------------------------------------------------------------------------------------------------------------------------------------------------------------------------------------------------------------------------------------------------------------------------------------------------------------------------------------------------------------------------------------------------------------------------------------------------------------------------------------------------------------------------------------------------------------------------------------------------------------------------------------------------------------------------------------------------------------------------------------------------------------------------------------------------------------------------------------------------------------------------------------------------------------------------------------------------------------------------------------------------------------------------------------------------------------------------------------------------------------------------------------------------------------------------------------------------------------------------------------------------------------------------------------------------------------------------------------------------------------------------------------------------------------------------------------------------------------------------------------------------------------------------------------------------------------------------------------------------------------------------------------------------------------------------------------------------------------------------------------------------------------------------------------------------------------------------------------------------------------------------------------------------------------------------------------------------------------------------------------------------------------------------------------------------------------------------------------------------------------------------------------------------------------------------------------------------------------------------------------------------------------------------------------------------------------------------------------------------------------------------------------------------------------------------------------------------------------------------------------------------------------------------------------------------------------------------------------------------------------------------------------------------------------------------------------------------------------------------------------------------------------------------------------------------------------------------------------------------------------------------------------------------------------------------------------------------------------------------------------------------------------------------------------------------------------------------------------------------------------------------------------------------------------------------------------------------------------------------------------------------------------------------------------------------------------------------------------------------------------------------------------------------------------------------------------------------------------------------------------------------------------------------------------------------------------------------------------------------------------------------------------------------------------------------------------------------------------------------------------------------------------------------------------------------------------------------------------------------------------------------------------------------------------------------------------------------------------------------------------------------------------------------------------------------------------------------------------------------------------------------------------------------------------------------------------------------------------------------------------------------------------------------------------------------------------------------------------------------------------------------------------------------------------------------------------------------------------------------------------------------------------------------------------------------------------------------------------------------------------------------------------------------------------------------------------------------------------------------------------------------------------------------------------------------------------------------------------------------------------------------------------------------------------------------------------------------------------------------------------------------------------------------------------------------------------------------------------------------------------------------------------------------------------------------------------------------------------------------------------------------------------------------------------------------------------------------------------------------------------------------------------------------------------------------------------------------------------------------------------------------------------------------------------------------------------------------------------------------------------------------------------------------------------------------------------------------------------------------------------|

Barandon, S., Bales, M., Melchior, M., Glangeaud-Freudenthal, N., Pambrun, E., Bois, C., Verdoux, H., Sutter-Dallay, A.L., 2016. Early prenatal interview and antenatal education for childbirth and parenthood: Associated psychosocial and obstetric characteristics in women of the ELFE cohort. [French]. *Journal de Gynecologie Obstetrique et Biologie de la Reproduction* 45:599-607.

Barasa, A., Rosengren, A., Sandstrom, T.Z., Ladfors, L., Schaufelberger, M., 2017. Heart Failure in Late Pregnancy and Postpartum: Incidence and Long-Term Mortality in Sweden From 1997 to 2010. *Journal of Cardiac Failure* 23:370-78.

Barimani, M., Oxelmark, L., Johansson, S.E., Langius?Eklöf, A., Hylander, I., 2014. Professional support and emergency visits during the first 28 weeks postpartum. *Scandinavian Journal of Caring Sciences* 28:57-65.

Barker, E.D., Kirkham, N., Ng, J., Jensen, S.K.G., 2013. Prenatal maternal depression symptoms and nutrition, and child cognitive function. *British Journal of Psychiatry* 203:417-21.

Barker, M., Dombrowski, S.U., Colbourn, T., Fall, C.H., Kriznik, N.M., Lawrence, W.T., Norris, S.A., Ngaiza, G., Patel, D., et al., 2018. Intervention strategies to improve nutrition and health behaviours before conception. *The Lancet* 391:1853-64.

Barone, L., Lionetti, F., Dellagiulia, A., 2014. Maternal-fetal attachment and its correlates in a sample of Italian women: a study using the Prenatal Attachment Inventory. *Journal of Reproductive and Infant Psychology* 32:230-39.

Bartington, S., Griffiths, L.J., Tate, A.R., Dezateux, C., 2006. Are breastfeeding rates higher among mothers delivering in Baby Friendly accredited maternity units in the UK? *International Journal of Epidemiology* 35:1178-86.

Bense, L., Eklund, G., 2003. Prenatal nicotine exposure and pulmonary barotrauma of newborns. *Lung* 181:137-48.

Benyamini, Y., Molcho, M.L., Dan, U., Gozlan, M., Preis, H., 2017. Women's attitudes towards the medicalization of childbirth and their associations with planned and actual modes of birth. *Women and Birth* 30:424-30.

Bernazzani, O., Marks, M.N., Bifulco, A., Siddle, K., Asten, P., Conroy, S., 2005. Assessing psychosocial risk in pregnant/postpartum women using the Contextual Assessment of Maternity Experience (CAME): Recent life adversity, social support and maternal feelings. *Social Psychiatry and Psychiatric Epidemiology: The International Journal for Research in Social and Genetic Epidemiology and Mental Health Services* 40:497-508.

Bhopal, R.S., Tate, J.A., Foy, C., Moffatt, S., Phillimore, P.R., 1999. Residential proximity to industry and adverse birth outcomes. *Lancet* 354:920-21.

Bidstrup, S.B., Kaerlev, L., Thulstrup, A.M., Ellekilde Bonde, J.P., 2015. Women referred for occupational risk assessment in pregnancy have no increased risk of adverse obstetric outcomes. *Danish Medical Journal* 62 (8) (no pagination).

Bina, R., Harrington, D., 2017. Differential Predictors of Postpartum Depression and Anxiety: The Edinburgh Postnatal Depression Scale Hebrew Version Two Factor Structure Construct Validity. *Maternal & Child Health Journal* 21:2237-44.

Blagoeva Atanasova, V., Arevalo-Serrano, J., Antolin Alvarado, E., Garcia-Tizon Larroca, S., 2018. Maternal mortality in Spain and its association with country of origin: cross-sectional study during the period 1999-2015. *BMC Public Health* 18:1171.

Bolten, M.I., Wurmser, H., Buske-Kirschbaum, A., Papousek, M., Pirke, K.M., Hellhammer, D., 2011. Cortisol levels in pregnancy as a psychobiological predictor for birth weight. *Archives of Women's Mental Health* 14:33-41.

Bonellie, S., 2001. Effect of maternal age, smoking and deprivation on birthweight. *Paediatric and Perinatal Epidemiology* 15:19-26.

Bonellie, S.R., 2012. Use of multiple linear regression and logistic regression models to investigate changes in birthweight for term singleton infants in Scotland. *Journal of Clinical Nursing* 21:2780-88.

Bonet, M., Smith, L.K., Pilkington, H., Draper, E.S., Zeitlin, J., 2013. Neighbourhood deprivation and very preterm birth in an English and French cohort. *BMC Pregnancy and Childbirth* 13:9.

Botchway, S.K., Quigley, M.A., Gray, R., 2014. Pregnancy-associated outcomes in women who spent some of their childhood looked after by local authorities: Findings from the UK Millennium Cohort Study. *BMJ Open* 4 (12) (no pagination).

Bouthoorn, S.H., Gaillard, R., Steegers, E.A., Hofman, A., Jaddoe, V.W., van Lenthe, F.J., Raat, H., Bouthoorn, S.H., Gaillard, R., et al., 2012. Ethnic differences in blood pressure and hypertensive complications during pregnancy: the Generation R study. *Hypertension* (0194911X) 60:198-205.

Bowen, E., Heron, J., Waylen, A., Wolke, D., 2005. Domestic violence risk during and after pregnancy: findings from a British longitudinal study. *BJOG* 112:1083.

Boyle, E.M., Johnson, S., Manktelow, B., Seaton, S.E., Draper, E.S., Smith, L.K., Dorling, J., Marlow, N., Petrou, S., et al., 2015. Neonatal outcomes and delivery of care for infants born late preterm or moderately preterm: a prospective population-based study. *Archives of Disease in Childhood. Fetal and Neonatal Edition* 100:F479.

Brace, V., Penney, G., Hall, M., 2004. Quantifying severe maternal morbidity: a Scottish population study. *BJOG: an International Journal of Obstetrics & Gynaecology* 111:481-84.

Brick, A., Layte, R., 2011. Exploring Trends in the Rate of Caesarean Section in Ireland 1999-2007. *Economic & Social Review* 42.

Brick, A., Layte, R., McKeating, A., Sheehan, S.R., Turner, M.J., 2019. Does maternal obesity explain trends in caesarean section rates? Evidence from a large Irish maternity hospital. *Irish Journal of Medical Science* (1971-):1-9.

Brisch, K.H., Munz, D., Bemmerer-Mayer, K., Kachele, H., al., e., 2002. Ultrasound scanning for diagnosis of foetal abnormality and maternal anxieties in a longitudinal perspective. *Journal of Reproductive and Infant Psychology* 20:223-35.

Bronshtein, M., Gover, A., Beloosesky, R., Dabaja, H., Ginsberg, Y., Weiner, Z., Khatib, N., 2018. Characteristics and outcomes of ptyalism gravidarum. *Israel Medical Association Journal* 20:573-75.

Brough, L., Rees, G.A., Crawford, M.A., Morton, R.H., Dorman, E.K., 2010. Effect of multiple-micronutrient supplementation on maternal nutrient status, infant birth weight and gestational age at birth in a low-income, multi-ethnic population. *British Journal of Nutrition* 104:437-45.

Brown, A.E., Raynor, P., Benton, D., Lee, M.D., 2010. Indices of Multiple Deprivation predict breastfeeding duration in England and Wales. *European Journal of Public Health* 20:231-35.

Bruckner, T.A., Mortensen, L.H., Catalano, R.A., 2016. Spontaneous Pregnancy Loss in Denmark Following Economic Downturns. *American Journal of Epidemiology* 183:701-08.

Brynhildsen, J., Sydsjo, A., Ekholm-Selling, K., Josefsson, A., 2009. The importance of maternal BMI on infant's birth weight in four BMI groups for the period 1978-2001. *Acta Obstetrica et Gynecologica Scandinavica* 88:391-6.

Cantarutti, A., Franchi, M., Rea, F., Merlino, L., Corrao, G., 2018. Use of Nimesulide During Early Pregnancy and the Risk of Congenital Malformations: A Population-Based Study from Italy. *Advances in Therapy* 35:981-92.

Castello, A., Rio, I., Garcia-Perez, J., Fernandez-Navarro, P., Waller, L.A., Clennon, J.A., Bolumar, F., Lopez-Abente, G., 2013. Adverse birth outcomes in the vicinity of industrial installations in Spain 2004-2008. *Environmental Science and Pollution Research* 20:4933-46.

Castello, A., Rio, I., Sandin-Vazquez, M., Bolumar, F., 2011. Shortening of gestational length among native-born and immigrants in Spain (1997-2008). *European Journal of Epidemiology* 26:563-70.

Catalano, P.M., McIntyre, H.D., Cruickshank, J.K., McCance, D.R., Dyer, A.R., Metzger, B.E., Lowe, L.P., Trimble, E.R., Coustan, D.R., et al., 2012. The hyperglycemia and adverse pregnancy outcome study: associations of GDM and obesity with pregnancy outcomes. *Diabetes Care* 35:780-86.

|  |                                                                                                                                                                                                                                                                                                                                                                                                                                                                                                                                                                                                                                                                                                                                                                                                                                                                                                                                                                                                                                                                                                                                                                                                                                                                                                                                                                                                                                                                                                                                                                                                                                                                                                                                                                                                                                                                                                                                                                                                                                                                                                                                                                                                                                                                                                                                                                                                                                                                                                                                                                                                                                                                                                                                                                                                                                                                                                                                                                                                                                                                                                                                                                                                                                                                                                                                                                                                                                                                                                                                                                                                                                                                                                                                                                                                                                                                                                                                                                                                                                                                                                                                                                                                                                                                                                                                                                                                                                                                                                                                                                                                                                                                                                                                                                                                                                                                                                                                                                                                                                                                                                                                                                                                                                                                                                                                                                                                                                                                                                                                                                                                                                                                                                                                                                                                                                                                                                                                                                                                                                                                                                                                                                                                                                                                                                                                                                                                                                                                                                                                                                                                                                                                                                                                                                                                                                                                                                                                                                                                                                                                                                                                                                                                                                                                                                                                                                                                                                                                                                                                                                                                                                                                                                                                                                                                                                                                                                                                                                                                                                                                                                                                                                                                                                                                                                                                                                                                                                                                                                                                                                                                                                                                                                                                                                                                                   |
|--|-------------------------------------------------------------------------------------------------------------------------------------------------------------------------------------------------------------------------------------------------------------------------------------------------------------------------------------------------------------------------------------------------------------------------------------------------------------------------------------------------------------------------------------------------------------------------------------------------------------------------------------------------------------------------------------------------------------------------------------------------------------------------------------------------------------------------------------------------------------------------------------------------------------------------------------------------------------------------------------------------------------------------------------------------------------------------------------------------------------------------------------------------------------------------------------------------------------------------------------------------------------------------------------------------------------------------------------------------------------------------------------------------------------------------------------------------------------------------------------------------------------------------------------------------------------------------------------------------------------------------------------------------------------------------------------------------------------------------------------------------------------------------------------------------------------------------------------------------------------------------------------------------------------------------------------------------------------------------------------------------------------------------------------------------------------------------------------------------------------------------------------------------------------------------------------------------------------------------------------------------------------------------------------------------------------------------------------------------------------------------------------------------------------------------------------------------------------------------------------------------------------------------------------------------------------------------------------------------------------------------------------------------------------------------------------------------------------------------------------------------------------------------------------------------------------------------------------------------------------------------------------------------------------------------------------------------------------------------------------------------------------------------------------------------------------------------------------------------------------------------------------------------------------------------------------------------------------------------------------------------------------------------------------------------------------------------------------------------------------------------------------------------------------------------------------------------------------------------------------------------------------------------------------------------------------------------------------------------------------------------------------------------------------------------------------------------------------------------------------------------------------------------------------------------------------------------------------------------------------------------------------------------------------------------------------------------------------------------------------------------------------------------------------------------------------------------------------------------------------------------------------------------------------------------------------------------------------------------------------------------------------------------------------------------------------------------------------------------------------------------------------------------------------------------------------------------------------------------------------------------------------------------------------------------------------------------------------------------------------------------------------------------------------------------------------------------------------------------------------------------------------------------------------------------------------------------------------------------------------------------------------------------------------------------------------------------------------------------------------------------------------------------------------------------------------------------------------------------------------------------------------------------------------------------------------------------------------------------------------------------------------------------------------------------------------------------------------------------------------------------------------------------------------------------------------------------------------------------------------------------------------------------------------------------------------------------------------------------------------------------------------------------------------------------------------------------------------------------------------------------------------------------------------------------------------------------------------------------------------------------------------------------------------------------------------------------------------------------------------------------------------------------------------------------------------------------------------------------------------------------------------------------------------------------------------------------------------------------------------------------------------------------------------------------------------------------------------------------------------------------------------------------------------------------------------------------------------------------------------------------------------------------------------------------------------------------------------------------------------------------------------------------------------------------------------------------------------------------------------------------------------------------------------------------------------------------------------------------------------------------------------------------------------------------------------------------------------------------------------------------------------------------------------------------------------------------------------------------------------------------------------------------------------------------------------------------------------------------------------------------------------------------------------------------------------------------------------------------------------------------------------------------------------------------------------------------------------------------------------------------------------------------------------------------------------------------------------------------------------------------------------------------------------------------------------------------------------------------------------------------------------------------------------------------------------------------------------------------------------------------------------------------------------------------------------------------------------------------------------------------------------------------------------------------------------------------------------------------------------------------------------------------------------------------------------------------------------------------------------------------------------------------------------------------------------------------------------------------------------------------------------------------------------------------------------------------------------------------------------------------------------------------------------------------------------------------------------------------------------------------------------------------------------------------------------------------------------------------------------------------------------------------------------------------------------------|
|  | <p>Clark, J.D., Mossey, P.A., Sharp, L., Little, J., 2003. Socioeconomic status and orofacial clefts in Scotland, 1989 to 1998. <i>Cleft Palate-Craniofacial Journal</i> 40:481-85.</p> <p>Class, Q.A.P., Mortensen, P.B.P., Henriksen, T.B.P., Dalman, C.M.D., D'Onofrio, B.M.P., Khashan, A.S.P., 2015. Preconception Maternal Bereavement and Infant and Childhood Mortality: A Danish Population-Based Study. <i>Psychosomatic Medicine</i> 77:863.</p> <p>Coelho, H.F., Murray, L., Royal-Lawson, M., Cooper, P.J., 2011. Antenatal anxiety disorder as a predictor of postnatal depression: A longitudinal study. <i>Journal of Affective Disorders</i> 129:348-53.</p> <p>Collingwood Bakeo, A., 2006. Investigating variations in infant mortality in England and Wales by mother's country of birth, 1983-2001. <i>Paediatric and Perinatal Epidemiology</i> 20:127-39.</p> <p>Conde, A., Figueiredo, B., Tendais, I., Teixeira, C., Costa, R., Pacheco, A., Rodrigues, M.C., Nogueira, R., 2010. Mother's anxiety and depression and associated risk factors during early pregnancy: effects on fetal growth and activity at 20-22 weeks of gestation. <i>Journal of Psychosomatic Obstetrics &amp; Gynecology</i> 31:70-82.</p> <p>Cooper, D.L., Petherick, E.S., Wright, J., 2013. Lifestyle related risk factors in a multi-ethnic cohort of pregnant women: Preliminary results from the Born in Bradford study. <i>Public Health</i> 127:1034-37.</p> <p>Cooper, J., Botting, B., 1992. Analysing fertility and infant mortality by mothers social class as defined by occupation, <i>Population Trends</i>, pp. 15-21.</p> <p>Corchia, C., Orzalesi, M., 2007. Geographic variations in outcome of very low birth weight infants in Italy. <i>Acta Paediatrica, International Journal of Paediatrics</i> 96:35-38.</p> <p>Cordier, S., Lehébel, A., Amar, E., Anzivino-Viricel, L., Hours, M., Monfort, C., Chevrier, C., Chiron, M., Robert-Gnansia, E., 2010. Maternal residence near municipal waste incinerators and the risk of urinary tract birth defects. <i>Occupational &amp; Environmental Medicine</i> 67:493-99.</p> <p>Costa-Martins, J.M., Pereira, M., Martins, H., Moura-Ramos, M., Coelho, R., Tavares, J., 2014. The Role of Maternal Attachment in the Experience of Labor Pain: A Prospective Study. <i>Psychosomatic Medicine</i> 76:221-28.</p> <p>Crespo, E., España, M.C., Basteiro, E., Zegarra, M.M., Botet, F., Pérez, J.M., Arranz, Á., Palacio, M., 2015. Evaluación de los resultados del programa «Parto en el hospital, comadrona en casa». <i>Matronas Profesión</i> 16:20-27.</p> <p>Cresswell, P.A., Pattenden, S., Scott, J.E.S., Vrijheid, M., 2003. Risk of congenital anomalies near the Byker waste combustion plant. <i>Journal of Public Health Medicine</i> 25:237-42.</p> <p>Czeizel, A.E., Dudas, I., Puho, E., 2005. Short-term paracetamol therapy during pregnancy and a lower rate of preterm birth. <i>Paediatric and Perinatal Epidemiology</i> 19:106-11.</p> <p>Czeizel, A.E., Puho, E., 2004. Association between severe nausea and vomiting in pregnancy and lower rate of preterm births. <i>Paediatric and Perinatal Epidemiology</i> 18:253-9.</p> <p>Dadvand, P., Wright, J., Martinez, D., Basagana, X., McEachan, R.R.C., Cirach, M., Gidlow, C.J., de Hoogh, K., Grazuleviciene, R., et al., 2014. Inequality, green spaces, and pregnant women: Roles of ethnicity and individual and neighbourhood socioeconomic status. <i>Environment International</i> 71:101-08.</p> <p>Dahl, L.B., Berge, L.N., Dramsdahl, H., Vermeer, A., Huurnink, A., Kaarensen, P.I., Oian, P., 2000. Antenatal, neonatal and post neonatal deaths evaluated by medical audit: A population-based study in northern Norway - 1976 to 1997. <i>Acta Obstetrica et Gynecologica Scandinavica</i> 79:1075-82.</p> <p>Daly, B., Young, S., Marla, R., Riddell, L., Junkin, R., Weidenhammer, N., Dolan, J., Kinsella, J., Zhang, R., 2017. Persistent pain after caesarean section and its association with maternal anxiety and socioeconomic background. <i>International Journal of Obstetric Anesthesia</i> 29:57-63.</p> <p>Datta-Nemdharry, P., Dattani, N., Macfarlane, A.J., 2012. Birth outcomes for African and Caribbean babies in England and Wales: retrospective analysis of routinely collected data. <i>BMJ open</i> 2:e001088.</p> <p>Dattani, N., Cooper, N., Rodrigues, L., Campbell, O., Rooney, C., 2000. Analysis of risk factors for neonatal mortality in England and Wales, 1993-97: based on singleton babies weighing 2,500-5,499 grams, <i>Health Statistics Quarterly. Office for National Statistics</i>, pp. 29-35.</p> <p>Dattani, N., Rowan, S., 2002. Causes of neonatal deaths and stillbirths: a new hierarchical classification in ICD-10 Presents a hierarchical classification that will be used for deriving a single cause group for stillbirths and neonates in ICD-10 replacing the classifications used in ICD-9, <i>Health Statistics Quarterly. Office for National Statistics</i>, pp. 16-22.</p> <p>David, M., Borde, T., Brenne, S., Ramsauer, B., Hinkson, L., Henrich, W., Razum, O., Breckenkamp, J., 2018. Obstetric care quality indicators and outcomes based on the degree of acculturation of immigrants-results from a cross-sectional study in Berlin. <i>Archives of Gynecology &amp; Obstetrics</i> 297:313-22.</p> <p>de Graaf, J.P., Schutte, J.M., Poeran, J.J., van Roosmalen, J., Bonsel, G.J., Steegers, E.A., 2012. Regional differences in Dutch maternal mortality. <i>BJOG: An International Journal of Obstetrics &amp; Gynaecology</i> 119:582-88.</p> <p>Delbaere, I., Verstraelen, H., Goetgeluk, S., Martens, G., De Backer, G., Temmerman, M., 2007. Pregnancy outcome in primiparae of advanced maternal age. <i>European Journal of Obstetrics and Gynecology and Reproductive Biology</i> 135:41-46.</p> <p>Delpisheh, A., Brabin, L., Attia, E., Brabin, B.J., 2008. Pregnancy late in life: a hospital-based study of birth outcomes. <i>Journal of Women's Health</i> (15409996) 17:965-70.</p> <p>Di Napoli, A., Di Lallo, D., Franco, F., Scapillati, M.E., Zocchetti, C., Agostino, R., Orzalesi, M., 2009. Access to level III perinatal care for pregnancies of very short duration (&lt;32 weeks). <i>Journal of Perinatal Medicine</i> 37:236-43.</p> <p>Di Napoli, A., Di Lallo, D., Pezzotti, P., Forastiere, F., Porta, D., 2006. Effects of parental smoking and level of education on initiation and duration of breastfeeding. <i>Acta Paediatrica, International Journal of Paediatrics</i> 95:678-85.</p> <p>Dibben, C., Clemens, T., 2015. Place of work and residential exposure to ambient air pollution and birth outcomes in Scotland, using geographically fine pollution climate mapping estimates. <i>Environmental Research</i> 140:535-41.</p> <p>Dolk, H., Pattenden, S., Vrijheid, M., Thakrar, B., Armstrong, B., 2000. Perinatal and infant mortality and low birth weight among residents near cokeworks in Great Britain. <i>Archives of Environmental Health</i> 55:26-30.</p> <p>Dorheim, S.K., Bjorvatn, B., Eberhard-Gran, M., 2014. Can insomnia in pregnancy predict postpartum depression? A longitudinal, population-based study. <i>PLoS One</i> 9 (4) (no pagination).</p> <p>Du Preez, A., Conroy, S., Pawlby, S., Moran, P., Pariante, C.M., 2016. Differential effects of ethnic density on the risk of postnatal depression and personality dysfunction. <i>British Journal of Psychiatry</i> 208:49-55.</p> <p>Eiriksdottir, V.H., Valdimarsdottir, U.A., Asgeirsdottir, T.L., Hauksdottir, A., Lund, S.H., Bjarnadottir, R.I., Cnattingius, S., Zoega, H., 2015. Pregnancy-Induced Hypertensive Disorders before and after a National Economic Collapse: A Population Based Cohort Study. <i>PLoS One [Electronic Resource]</i> 10:e0138534.</p> <p>Elliott, P., Briggs, D., Morris, S., de Hoogh, C., Hurt, C., Jensen, T.K., Maitland, I., Richardson, S., Wakefield, J., et al., 2001. Risk of adverse birth outcomes in populations living near landfill sites. <i>BMJ</i> 323:363-8.</p> <p>Englund-Ögge, L., Lise Brantsæter, A., Haugen, M., Sengpiel, V., Khatibi, A., Myhre, R., Myking, S., Margrete Meltzer, H., Kacerovsky, M., et al., 2012. Association between intake of artificially sweetened and sugar-sweetened beverages and preterm delivery: a large prospective cohort study. <i>American Journal of Clinical Nutrition</i> 96:552-59.</p> <p>Era, P., Heikkinen, E., Hietanen, A., Kubba, H., MacAndie, C., MacFarlane, M., Ritchie, K., Sorri, M., 2004. Es la sordera una enfermedad de la pobreza? La asociacion entre privacion socio-economica y la hipoacusia congenita. Is deafness a</p> |
|--|-------------------------------------------------------------------------------------------------------------------------------------------------------------------------------------------------------------------------------------------------------------------------------------------------------------------------------------------------------------------------------------------------------------------------------------------------------------------------------------------------------------------------------------------------------------------------------------------------------------------------------------------------------------------------------------------------------------------------------------------------------------------------------------------------------------------------------------------------------------------------------------------------------------------------------------------------------------------------------------------------------------------------------------------------------------------------------------------------------------------------------------------------------------------------------------------------------------------------------------------------------------------------------------------------------------------------------------------------------------------------------------------------------------------------------------------------------------------------------------------------------------------------------------------------------------------------------------------------------------------------------------------------------------------------------------------------------------------------------------------------------------------------------------------------------------------------------------------------------------------------------------------------------------------------------------------------------------------------------------------------------------------------------------------------------------------------------------------------------------------------------------------------------------------------------------------------------------------------------------------------------------------------------------------------------------------------------------------------------------------------------------------------------------------------------------------------------------------------------------------------------------------------------------------------------------------------------------------------------------------------------------------------------------------------------------------------------------------------------------------------------------------------------------------------------------------------------------------------------------------------------------------------------------------------------------------------------------------------------------------------------------------------------------------------------------------------------------------------------------------------------------------------------------------------------------------------------------------------------------------------------------------------------------------------------------------------------------------------------------------------------------------------------------------------------------------------------------------------------------------------------------------------------------------------------------------------------------------------------------------------------------------------------------------------------------------------------------------------------------------------------------------------------------------------------------------------------------------------------------------------------------------------------------------------------------------------------------------------------------------------------------------------------------------------------------------------------------------------------------------------------------------------------------------------------------------------------------------------------------------------------------------------------------------------------------------------------------------------------------------------------------------------------------------------------------------------------------------------------------------------------------------------------------------------------------------------------------------------------------------------------------------------------------------------------------------------------------------------------------------------------------------------------------------------------------------------------------------------------------------------------------------------------------------------------------------------------------------------------------------------------------------------------------------------------------------------------------------------------------------------------------------------------------------------------------------------------------------------------------------------------------------------------------------------------------------------------------------------------------------------------------------------------------------------------------------------------------------------------------------------------------------------------------------------------------------------------------------------------------------------------------------------------------------------------------------------------------------------------------------------------------------------------------------------------------------------------------------------------------------------------------------------------------------------------------------------------------------------------------------------------------------------------------------------------------------------------------------------------------------------------------------------------------------------------------------------------------------------------------------------------------------------------------------------------------------------------------------------------------------------------------------------------------------------------------------------------------------------------------------------------------------------------------------------------------------------------------------------------------------------------------------------------------------------------------------------------------------------------------------------------------------------------------------------------------------------------------------------------------------------------------------------------------------------------------------------------------------------------------------------------------------------------------------------------------------------------------------------------------------------------------------------------------------------------------------------------------------------------------------------------------------------------------------------------------------------------------------------------------------------------------------------------------------------------------------------------------------------------------------------------------------------------------------------------------------------------------------------------------------------------------------------------------------------------------------------------------------------------------------------------------------------------------------------------------------------------------------------------------------------------------------------------------------------------------------------------------------------------------------------------------------------------------------------------------------------------------------------------------------------------------------------------------------------------------------------------------------------------------------------------------------------------------------------------------------------------------------------------------------------------------------------------------------------------------------------------------------------------------------------------------------------------------------------------------------------------------------------------------------------------------------------------------------------------------------------------------------------------------------------------------------------------------------------------------------|

disease of poverty? The association between socio-economic deprivation and congenital hearing impairment. *International Journal of Audiology* 43:123-25.

Euro-Peristat, 2008. European Perinatal Health Report by the EURO-PERISTAT project in collaboration with SCPE, EUROCAT & EURONEOSTAT. EURO-PERISTAT, SCPE, EUROCAT & EURONEOSTAT.

Even-Zohar Gross, N., Geva-Eldar, T., Pollak, Y., Hirsch, H.J., Gross, I., Gross-Tsur, V., 2017. Attitudes toward prenatal genetic testing and therapeutic termination of pregnancy among parents of offspring with Prader-Willi syndrome. *European Journal of Medical Genetics* 60:205-11.

Fantini, M.P., Stivanello, E., Dallolio, L., Loghi, M., Savoia, E., 2006. Persistent geographical disparities in infant mortality rates in Italy (1999–2001): comparison with France, England, Germany, and Portugal. *The European Journal of Public Health* 16:429-32.

Farbu, J., Haugen, M., Meltzer, H.M., Brantsaeter, A.L., 2014. Impact of singlehood during pregnancy on dietary intake and birth outcomes- A study in the Norwegian Mother and Child Cohort Study. *BMC Pregnancy and Childbirth* 14 (1) (no pagination).

Fiaschi, L., Housley, G., Nelson-Piercy, C., Gibson, J., Raji, A., Deb, S., Tata, L.J., 2019. Assessment of discharge treatment prescribed to women admitted to hospital for hyperemesis gravidarum. *International Journal of Clinical Practice* 73 (1) (no pagination).

Field, D., Draper, E.S., Fenton, A., Papiernik, E., Zeitlin, J., Blondel, B., Cuttini, M., Maier, R.F., Weber, T., et al., 2009. Rates of very preterm birth in Europe and neonatal mortality rates. *Archives of Disease in Childhood-Fetal and Neonatal Edition* 94:F253-F56.

Fleming, T.P., Watkins, A.J., Velazquez, M.A., Mathers, J.C., Prentice, A.M., Stephenson, J., Barker, M., Saffery, R., Yajnik, C.S., et al., 2018. Origins of lifetime health around the time of conception: causes and consequences. *The Lancet* 391:1842-52.

Garay, S.M., Savory, K.A., Sumption, L., Penketh, R., Janssen, A.B., John, R.M., 2019. The grown in Wales study: Examining dietary patterns, custom birthweight centiles and the risk of delivering a small-for-gestational age (SGA) infant. *PLoS One* 14 (3) (no pagination).

Garcia, R., Ali, N., Guppy, A., Griffiths, M., Randhawa, G., 2017. Differences in the pregnancy gestation period and mean birth weights in infants born to Indian, Pakistani, Bangladeshi and white British mothers in Luton, UK: a retrospective analysis of routinely collected data. *BMJ open* 7:e017139.

Ghosh, R.E., Berild, J.D., Sterrantino, A.F., Toledano, M.B., Hansell, A.L., 2018. Birth weight trends in England and Wales (1986-2012): babies are getting heavier. *Archives of Disease in Childhood Fetal & Neonatal Edition* 103:F264-F70.

Goedhart, G.M., Snijders, A.C.M., Hesselink, A.E.P., van Poppel, M.N.P., Bonsel, G.J.M.D.P., Vrijkotte, T.G.M.P., 2010. Maternal Depressive Symptoms in Relation to Perinatal Mortality and Morbidity: Results From a Large Multiethnic Cohort Study. *Psychosomatic Medicine* 72:769.

Goossens, J., Van Den Branden, Y., Van der Sluys, L., Delbaere, I., Van Hecke, A., Verhaeghe, S., Beeckman, D., 2016. The prevalence of unplanned pregnancy ending in birth, associated factors, and health outcomes. *Human Reproduction* 31:2821-33.

Gorman, D.R., Katikireddi, S.V., Morris, C., Chalmers, J.W., Sim, J., Szamotulska, K., Mierzejewska, E., Hughes, R.G., 2014. Ethnic variation in maternity care: a comparison of Polish and Scottish women delivering in Scotland 2004-2009. *Public Health* 128:262-67.

Gray, R., Bonellie, S.R., Chalmers, J., Greer, I., Jarvis, S., Kurinczuk, J.J., Williams, C., 2009. Contribution of smoking during pregnancy to inequalities in stillbirth and infant death in Scotland 1994-2003: retrospective population based study using hospital maternity records. *BMJ (British Medical Journal)* 339:906-08.

Gray, R., Quigley, M.A., Hockley, C., Kurinczuk, J.J., Goldacre, M., Brocklehurst, P., 2007. Caesarean delivery and risk of stillbirth in subsequent pregnancy: a retrospective cohort study in an English population. *BJOG* 114:264.

Grazuleviciene, R., Nieuwenhuijsen, M.J., Vencloviene, J., Kostopoulou-Karadanelli, M., Krasner, S.W., Danileviciute, A., Balcius, G., Kapustinskiene, V., 2011. Individual exposures to drinking water trihalomethanes, low birth weight and small for gestational age risk: a prospective Kaunas cohort study. *Environmental Health : a global access science source* 10:32.

Grytten, J., Skau, I., Sørensen, R.J., 2014. Educated mothers, healthy infants. The impact of a school reform on the birth weight of Norwegian infants 1967–2005. *Social Science & Medicine* 105:84-92.

Gynaecologists, R.C.o.O.a., 2018. RCOG statement in response to Lancet series on pre-conception health, London.

Gynaecologists, R.C.o.O.a., 2020. BJOG release: A greater focus on socially disadvantaged women is needed to improve maternity care in England, suggest researchers.

Hahn, K.A., Hatch, E.E., Rothman, K.J., Mikkelsen, E.M., Brogly, S.B., Sørensen, H.T., Riis, A.H., Wise, L.A., 2015. History of oral contraceptive use and risk of spontaneous abortion. *Annals of Epidemiology* 25:936-41.e1.

Haldre, K., Rahu, K., Karro, H., Rahu, M., 2007. Is a poor pregnancy outcome related to young maternal age? A study of teenagers in Estonia during the period of major socio-economic changes (from 1992 to 2002). *European Journal of Obstetrics and Gynecology and Reproductive Biology* 131:45-51.

Hammer, P., Flachs, E., Specht, I., Pinborg, A., Petersen, S., Larsen, A., Hougaard, K., Hansen, J., Hansen, A., et al., 2018. Night work and hypertensive disorders of pregnancy: A national register-based cohort study. *Scandinavian Journal of Work, Environment & Health* 44:403-13.

Hamulka, J., Zielinska, M.A., Chadzynska, K., 2018. The combined effects of alcohol and tobacco use during pregnancy on birth outcomes. *Roczniki Panstwowego Zakladu Higieny* 69:45-54.

Hayes, C., Kearney, M., O'Carroll, H., Zgaga, L., Geary, M., Kelleher, C., 2016. Patterns of smoking behaviour in low-income pregnant women: A cohort study of differential effects on infant birth weight. *International Journal of Environmental Research and Public Health* 13 (11) (no pagination).

Health, R.C.o.P.a.C., 2017a. State of Child Health, in: Viner, R. (Ed.). *Royal College of Paediatrics and Child Health*, London.

Health, R.C.o.P.a.C., 2017b. State of Child Health Report 2017 *Royal College of Paediatrics and Child Health*.

Hegaard, H.K., Kjaergaard, H., Moller, L.F., Wachmann, H., Ottesen, B., 2006. The effect of environmental tobacco smoke during pregnancy on birth weight. *Acta Obstetrica et Gynecologica Scandinavica* 85:675-81.

Heimonen, A., Janket, S.J., Meurman, J.H., Furuholm, J., Ackerson, L.K., Kaaja, R., 2008. Oral health care patterns and the history of miscarriage. *Oral Diseases* 14:734-40.

Hellström-Westas, L., Ericson, J., Flacking, R., Eriksson, M., Hoddinott, P., 2018. Breastfeeding and risk for ceasing in mothers of preterm infants—Long-term follow-up. *Maternal & Child Nutrition* 14:01-Jan.

Heppe, D.H., Steegers, E.A., Timmermans, S., Breeijen, H., Tiemeier, H., Hofman, A., Jaddoe, V.W., 2011. Maternal fish consumption, fetal growth and the risks of neonatal complications: the Generation R Study. *British Journal of Nutrition* 105:938-49.

Heslehurst, N., Rankin, J., Wilkinson, J.R., Summerbell, C.D., 2010. A nationally representative study of maternal obesity in England, UK: trends in incidence and demographic inequalities in 619 323 births, 1989-2007. *International Journal of Obesity* 34:420-28.

Hildingsson, I., Thomas, J., 2012. Perinatal Outcomes and Satisfaction with Care in Women with High Body Mass Index. *Journal of Midwifery & Women's Health* 57:336-44.

Homer, C.S.E., Kurinczuk, J.J., Spark, P., Comp, D., Brocklehurst, P., Knight, M., 2010. A Novel Use of a Classification System to Audit Severe Maternal Morbidity. *Midwifery* 26:532-36.

Hospital, C.W.I.U., 2017. Annual Clinical Report 2017. Coombe Women & Infants University Hospital.

Huidobro, A., Prentice, A., Fulford, T., Parodi, C., Rozowski, J., 2010. Gestational diabetes, comparison of women diagnosed in second and third trimester of pregnancy with non GDM women: Analysis of a cohort study. [Spanish]. *Revista Medica de Chile* 138:316-21.

Information & Statistics Division, 2003. Operative vaginal delivery in Scotland. A 20 year overview: births in Scotland publication series, Edinburgh.

Ingram, J.C., Greenwood, R.J., Woolridge, M.W., 2003. Hormonal predictors of postnatal depression at 6 months in breastfeeding women. *Journal of Reproductive and Infant Psychology* 21:61-68.

Ion, R.C., Wills, A.K., Bernal, A.L., 2015. Environmental Tobacco Smoke Exposure in Pregnancy is Associated with Earlier Delivery and Reduced Birth Weight. *Reproductive Sciences* 22:1603-11.

Jacobsson, B., Ladfors, L., Milsom, I., 2004. Advanced maternal age and adverse perinatal outcome. *Obstetrics & Gynecology* 104:727-33.

Jairaj, C., Fitzsimons, C.M., McAuliffe, F.M., O'Leary, N., Joyce, N., McCarthy, A., Cassidy, E., Donnelly, J., Tully, E., et al., 2018. A population survey of prevalence rates of antenatal depression in the Irish obstetric services using the Edinburgh postnatal depression scale (EPDS). *Archives of Women's Mental Health: No Pagination Specified*.

Juarez, S.P., Revuelta-Eugercios, B.A., 2014. Too heavy, too late: investigating perinatal health outcomes in immigrants residing in Spain. A cross-sectional study (2009-2011). *Journal of Epidemiology and Community Health* 68:863-68.

Kabir, Z., Clarke, V., Conroy, R., McNamee, E., Daly, S., Clancy, L., 2009. Low birthweight and preterm birth rates 1 year before and after the Irish workplace smoking ban. *BJOG: An International Journal of Obstetrics & Gynaecology* 116:1782-7.

Kayem, G., Kurinczuk, J., Lewis, G., Golightly, S., Brocklehurst, P., Knight, M., 2011. Risk factors for progression from severe maternal morbidity to death: A national cohort study. *PLoS One* 6 (12) (no pagination).

Kenny, L.C., Lavender, T., McNamee, R., O'Neill, S.M., Mills, T., Khashan, A.S., 2013. Advanced Maternal Age and Adverse Pregnancy Outcome: Evidence from a Large Contemporary Cohort. *PLoS One* 8 (2) (no pagination).

Kerrigan, A.M., Kingdon, C., 2010. Maternal obesity and pregnancy: a retrospective study. *Midwifery* 26:138-46.

Kesmodel, U., Olsen, S.F., Secher, N.J., 2001. Does alcohol increase the risk of preterm delivery?. [Danish]. *Ugeskrift for Læger* 163:4578-82.

Kilic, D., Pedersen, H., Kjaersgaard, M.I.S., Parnar, E.T., Vestergaard, M., Sorensen, M.J., Olsen, J., Bech, B.H., Christensen, J., et al., 2014. Birth outcomes after prenatal exposure to antiepileptic drugs - A population-based study. *Epilepsia* 55:1714-21.

Knight, H.E., Gurol-Urganci, I., Meulen, J.H., Mahmood, T.A., Richmond, D.H., Dougall, A., Cromwell, D.A., 2014. Vaginal birth after caesarean section: a cohort study investigating factors associated with its uptake and success. *BJOG* 121:183.

Knight, M., 2007. Eclampsia in the United Kingdom 2005. *BJOG: An International Journal of Obstetrics & Gynaecology* 114:1072-78.

Knight, M., Kurinczuk, J.J., Spark, P., Brocklehurst, P., 2010. Extreme obesity in pregnancy in the United Kingdom. *Obstetrics & Gynecology* 115:989-97.

Krabbendam, L., Smits, L., de Bie, R., Bastiaanssen, J., Stelma, F., van Os, J., 2005. The impact of maternal stress on pregnancy outcome in a well-educated Caucasian population. *Paediatric and Perinatal Epidemiology* 19:421-5.

Kritsotakis, G., Vassilaki, M., Chatzi, L., Georgiou, V., Philalithis, A.E., Kogevinas, M., Koutis, A., 2011. Maternal social capital and birth outcomes in the mother-child cohort in Crete, Greece (Rhea study). *Social Science & Medicine* 73:1653-60.

Kukla, L., Bouchalova, M., Coupek, P., 2001. [Birth weight and gestational age in relation to the course of pregnancy]. *Casopis Lekaru Ceskych* 140:662-7.

Kumarathasan, P., Williams, G., Bielecki, A., Blais, E., Hemmings, D.G., Smith, G., Von Dadelszen, P., Fisher, M., Arbuckle, T.E., et al., 2018. Characterization of maternal plasma biomarkers associated with delivery of small and large for gestational age infants in the MIREC study cohort. *PLoS One* 13 (11) (no pagination).

Kunzel, W., Misselwitz, B., 2003. Unexpected fetal death during pregnancy—a problem of unrecognized fetal disorders during antenatal care? *European Journal of Obstetrics, Gynecology, & Reproductive Biology* 110 Suppl 1:S86-92.

Laine, M.K., Masalin, S., Rono, K., Kautiainen, H., Gissler, M., Pennanen, P., Eriksson, J.G., 2019. Risk of preterm birth in primiparous women with exposure to antidepressant medication before pregnancy and/or during pregnancy—impact of body mass index. *Annals of Medicine* 51:51-57.

Li, D., Liu, L., Odouli, R., 2009. Presence of depressive symptoms during early pregnancy and the risk of preterm delivery: A prospective cohort study. *Human Reproduction* 24:146-53.

Li, Y., Townend, J., Rowe, R., Knight, M., Brocklehurst, P., Hollowell, J., 2014. The effect of maternal age and planned place of birth on intrapartum outcomes in healthy women with straightforward pregnancies: secondary analysis of the Birthplace national prospective cohort study. *BMJ open* 4:e004026.

Lipkind, H.S., Zuckerwise, L.C., Turner, E.B., Collins, J.J., Campbell, K.H., Reddy, U.M., Illuzi, J.L., Merriam, A.A., 2019. Severe maternal morbidity during delivery hospitalisation in a large international administrative database, 2008–2013: a retrospective cohort. *BJOG* 126:1223.

Liu, C., Cnattingius, S., Bergstrom, M., Ostberg, V., Hjern, A., 2016. Prenatal parental depression and preterm birth: a national cohort study. *BJOG* 123:1973.

Lorén-Guerrero, L., Gascón-Catalán, A., Pasierb, D., Romero-Cardiel, M.A., 2018. Assessment of significant psychological distress at the end of pregnancy and associated factors. *Archives of Women's Mental Health* 21:313.

Lovlie, A.L., Madar, A.A., 2017. Postpartum Depression Among Somali Women in Norway. *Journal of Immigrant and Minority Health* 19:638-44.

Lutonski, J.E., Greene, R.A., Byrne, B.M., 2012. Severe maternal morbidity during childbirth hospitalisation: a comparative analysis between the Republic of Ireland and Australia. *European Journal of Obstetrics & Gynecology and Reproductive Biology* 163:148-53.

Lutonski, J.E., Morrison, J.J., Greene, R.A., Lydon-Rochelle, M.T., 2011. Maternal morbidity during hospitalization for delivery. *Obstetrics & Gynecology* 117:596-602.

Maccabe, J.H., Martinsson, L., Lichtenstein, P., Nilsson, E., Cnattingius, S., Murray, R.M., Hultman, C.M., 2007. Adverse pregnancy outcomes in mothers with affective psychosis. *Bipolar Disorders* 9:305-09.

Macfarlane, A., Grant, J., Hancock, J., Hilder, L., Lyne, M., Costeloe, C., Hird, M., 2005. Early life mortality in East London: a feasibility study. Summary Report. Fetal and Infant Death in East London. London: City University.

Madureira Lima, J., Reeves, A., Billari, F.C., McKee, M., Stuckler, D., 2016. Austerity and Abortion in the European Union. *European Journal of Public Health* 26:518-19.

Maheer, J., Macfarlane, A., 2004. Inequalities in infant mortality: trends by social class, registration status, mother's age and birthweight, England and Wales, 1976-2000, *Health Statistics Quarterly*. Office of National Statistics, London, pp. 14-22.

Maliszewska, K., Swiatkowska-Freund, M., Bidzan, M., Preis, K., 2017. Screening for maternal postpartum depression and associations with personality traits and social support. A Polish follow-up study 4 weeks and 3 months after delivery. *Psychiatria Polska* 51:889-98.

Manktelow BN, S.L., Prunet C, Smith PW, Bobby T, Hyman-Taylor P, Kurinczuk JJ, Field DJ, Draper ES, on behalf of the MBRACE-UK Collaboration,, 2017. MBRACE-UK Perinatal Mortality Surveillance Report, UK Perinatal Deaths for Births from January to December 2015. University of Leicester, Leicester.

Marr, L., Lennox, C., McFadyen, A.K., 2014. Quantifying severe maternal morbidity in Scotland: a continuous audit since 2003. *Current Opinion in Anesthesiology* 27:275-81.

McCarthy, F.P., O'Keeffe, L.M., Khashan, A.S., North, R.A., Poston, L., McCowan, L.M., Baker, P.N., Dekker, G.A., Roberts, C.T., et al., 2013. Association between maternal alcohol consumption in early pregnancy and pregnancy outcomes. *Obstetrics & Gynecology* 122:830-37.

Mecacci, F., Serena, C., Avagliano, L., Cozzolino, M., Baroni, E., Rambaldi, M.P., Simeone, S., Castiglione, F., Taddei, G.L., et al., 2016. Stillbirths at term: case control study of risk factors, growth status and placental histology. *PLoS one* 11:e0166514.

Messer, J., 2011. An analysis of the socio-demographic characteristics of sole registered births and infant deaths, *Health statistics quarterly Office for National Statistics*, pp. 79-107.

Meyer, S., Raisig, A., Gortner, L., Ong, M.F., Bucheler, M., Tutdibi, E., 2009. In utero tobacco exposure: The effects of heavy and very heavy smoking on the rate of SGA infants in the Federal State of Saarland, Germany. *European Journal of Obstetrics and Gynecology and Reproductive Biology* 146:37-40.

Migault, L., Piel, C., Carles, C., Delva, F., Lacourt, A., Cardis, E., Zaros, C., de Seze, R., Baldi, I., et al., 2018. Maternal cumulative exposure to extremely low frequency electromagnetic fields and pregnancy outcomes in the Elfe cohort. *Environment International* 112:165-73.

Mohamed-Ahmed, O., Nair, M., Acosta, C., Kurinczuk, J.J., Knight, M., 2015. Progression from severe sepsis in pregnancy to death: a UK population-based case-control analysis. *BJOG* 122:1506.

Molgaard-Nielsen, D., Hviid, A., 2012. Maternal use of antibiotics and the risk of orofacial clefts: A nationwide cohort study. *Pharmacoepidemiology and Drug Safety* 21:246-53.

Morales-Suarez-Varela, M.M., Bille, C., Christensen, K., Olsen, J., 2006. Smoking habits, nicotine use, and congenital malformations. *Obstetrics & Gynecology* 107:51-57.

Morgan, O.W., Vrijheid, M., Dolk, H., 2004. Risk of low birth weight near EUROHAZCON hazardous waste landfill sites in England. *Archives of Environmental Health* 59:149-51.

Moser, K., Macfarlane, A., Chow, Y.H., Hilder, L., Dattani, N., 2007. Introducing new data on gestation-specific infant mortality among babies born in 2005 in England and Wales, *Health Statistics Quarterly*. Office of National Statistics, p. 13.

Mullally, A., Cleary, B.J., Barry, J., Fahey, T.P., Murphy, D.J., 2011. Prevalence, predictors and perinatal outcomes of periconceptional alcohol exposure - retrospective cohort study in an urban obstetric population in Ireland. *BMC Pregnancy and Childbirth* 11 (no pagination).

Murray, L., Woolgar, M., Murray, J., Cooper, P., 2003. Self-exclusion from health care in women at high risk for postpartum depression. *Journal of Public Health Medicine* 25:131-37.

Nair, M., Kurinczuk, J., Brocklehurst, P., Sellers, S., Lewis, G., Knight, M., 2015. Factors associated with maternal death from direct pregnancy complications: a UK national case-control study. *BJOG: An International Journal of Obstetrics & Gynaecology* 122:653-62.

Nilsson, P.M., Li, X., Sundquist, J., Sundquist, K., 2009. Maternal cardiovascular disease risk in relation to the number of offspring born small for gestational age: national, multi-generational study of 2.7 million births. *Acta Paediatrica* 98:985-89.

NMPA Project Team, 2019. National Maternity and Perinatal Audit: Clinical Report 2019. RCOG, London.

North, R.A., McCowan, L.M.E., Dekker, G.A., Poston, L., Chan, E.H.Y., Stewart, A.W., Black, M.A., Taylor, R.S., Walker, J.J., et al., 2011. Clinical risk prediction for pre-eclampsia in nulliparous women: development of model in international prospective cohort. *BMJ : British Medical Journal (Online)* 342:n.

Northern Ireland Statistics and Research Agency, 2011. Registrar General Northern Ireland Annual Report 2010. Office for National Statistics, Belfast.

Nyari, T.A., 2014. Risk factors and trends in the rate of stillbirth in Hungary between 1971 and 2010. *Journal of Maternal-Fetal and Neonatal Medicine* 27:1195-98.

Office for National Statistics, 2006. Social Trends No36 – 2006 edition in: Babb, P., Butcher, H., Church, J., and Zealey, L. (Ed.). Office of National Statistics, UK.

Office for National Statistics, 2007. Birth Statistics: Review of the Registrar General on births and patterns of family building in England and Wales. Office for National Statistics, Wales.

Oliva, G., Leggieri, C., D'Oria, L., Casarella, L., De Waure, C., Di Nardo, F., Masini, L., 2012. Epidemiological study on intrauterine fetal death: Analysis of 113 cases. *Italian Journal of Gynaecology and Obstetrics* 24:75-84.

Paul, D.A., Locke, R., Zook, K., Leef, K.H., Stefano, J.L., Colmorgen, G., 2006. Racial differences in prenatal care of mothers delivering very low birth weight infants. *Journal of Perinatology* 26:74-78.

Peristat, E., 2013. European perinatal health report. The health and care of pregnant women and babies in Europe in 2010. May 2013. EURO-PERISTAT Project with SCPE and EUROCAT.

Pfinder, M., Kunst, A.E., Feldmann, R., van Eijsden, M., Vrijkotte, T.G.M., 2013. Preterm birth and small for gestational age in relation to alcohol consumption during pregnancy: stronger associations among vulnerable women? Results from two large Western-European studies. *BMC Pregnancy & Childbirth* 13:49-49.

Pichini, S., Puig, C., Garcia-Algar, O., Pacifici, R., Figueroa, C., Vall, O., Munoz, L., Sunyer, J., 2002. Neonatal effects of smoking habit during pregnancy and sociodemographic determinants in Barcelona, Spain. *Medicina Clinica* 118:53-56.

Plancoulaine, S., Flori, S., Bat-Pitault, F., Patural, H., Lin, J.-S., Franco, P., 2017. Sleep Trajectories Among Pregnant Women and the Impact on Outcomes: A Population-Based Cohort Study. *Maternal & Child Health Journal* 21:1139-46.

Puthussery, S., Li, L., Tseng, P.C., Kilby, L., Kapadia, J., Puthusserry, T., Thind, A., 2019. Ethnic variations in risk of preterm birth in an ethnically dense socially disadvantaged area in the UK: A retrospective cross-sectional study. *BMJ Open* 9 (3) (no pagination).

Raatikainen, K., Heiskanen, N., Heinonen, S., 2005. Marriage still protects pregnancy. *BJOG* 112:1411.

Raatikainen, K., Heiskanen, N., Heinonen, S., 2006. Induced Abortion: Not an Independent Risk Factor for Pregnancy Outcome, But a Challenge for Health Counseling. *Annals of Epidemiology* 16:587-92.

Raatikainen, K., Heiskanen, N., Heinonen, S., 2007. Under-attending free antenatal care is associated with adverse pregnancy outcomes. *BMC Public Health* 7:268.

Rakoczi, I., Fogarasi-Grenczer, A., Takacs, P., Balazs, P., 2016. The impact of secondhand smoke on neonatal biometric outcomes and gestational age in Hungary. *New Medicine* 20:37-41.

Ralph, S., Morris, M., Fallows, S., Abayomi, J., 2011. Does maternal early pregnancy underweight influence neonatal birth outcome? A retrospective study in Liverpool. *Proceedings of the Nutrition Society* 70.

Rapisardi, G., Caini, S., Barchielli, A., Bondi, C., 2007. Breastfeeding in a paediatric Health Department in Florence, Italy: Prevalence and associated factors. [Italian]. *Quaderni ACP* 14:06-Oct.

Rauchfuss, M., Fischer, T., Bogner, G., Maier, B., 2012. Influence of so far neglected psychosomatic factors, BMI and smoking on pregnancy-induced hypertension (PIH). *Pregnancy Hypertension* 2:93-100.

Rayfield, S., Oakley, L., Quigley, M.A., 2015. Association between breastfeeding support and breastfeeding rates in the UK: a comparison of late preterm and term infants. *BMJ open* 5:e009144.

Razum, O., Jahn, A., Snow, R., 1999. Maternal mortality in the former East Germany before and after reunification: changes in risk by marital status. *British Medical Journal* 319:1104-05.

RCM, 2013. Taking time out, Midwives. The Royal College of Midwives, London, pp. 3-58.

Restall, A., Taylor, R.S., Thompson, J., Flower, D., Dekker, G.A., Kenny, L.C., Poston, L., McCowan, L.M., 2014. Risk factors for excessive gestational weight gain in a healthy, nulliparous cohort. *Journal of Obesity* 2014.

Restrepo-Méndez, M.C., Lawlor, D.A., Horta, B.L., Matijasevich, A., Santos, I.S., Menezes, A.M.B., Barros, F.C., Victora, C.G., 2015. The association of maternal age with birthweight and gestational age: a cross-cohort comparison. *Paediatric & Perinatal Epidemiology* 29:31-40.

Reynolds, C.M.E., Egan, B., O'Malley, E.G., McMahon, L., Sheehan, S.R., Turner, M.J., 2019. Fetal growth and maternal alcohol consumption during early pregnancy. *European Journal of Obstetrics and Gynecology and Reproductive Biology* 236:148-53.

Rigas, A.S., Pedersen, O.B., Sorensen, E., Thorner, L.W., Larsen, M.H., Katz, L.M., Nielsen, K., Titlestad, K., Edgren, G., et al., 2019. Frequent blood donation and offspring birth weight-a next-generation association? *Transfusion* 59:995-1001.

Rode, L., Kjaergaard, H., Damm, P., Ottesen, B., Hegaard, H., 2013. Effect of smoking cessation on gestational and postpartum weight gain and neonatal birth weight. *Obstetrics and Gynecology* 122:618-25.

Rodrigues, T., Rocha, L., Barros, H., 2008. Physical abuse during pregnancy and preterm delivery. *American Journal of Obstetrics & Gynecology* 198:171.e1-6.

Román Almendros, M.d.R., García-Campaña, A., Hidalgo-Lacalle, M., López-León, M.d.C., 2018. Perfil de las gestantes y grado de exposición al humo del tabaco. *Matronas Profesion* 19:135-41.

Rotunda Hospital, 2018. The Rotunda Hospital Dublin Annual Report 2018. Rotunda Hospital.

Rours, G.I.J.G., Duijts, L., Moll, H.A., Arends, L.R., De Groot, R., Jaddoe, V.W., Hofman, A., Steegers, E.A.P., Mackenbach, J.P., et al., 2011. Chlamydia trachomatis infection during pregnancy associated with preterm delivery: A population-based prospective cohort study. *European Journal of Epidemiology* 26:493-502.

Rowe, R., Li, Y., Knight, M., Brocklehurst, P., Hollowell, J., 2016. Maternal and perinatal outcomes in women planning vaginal birth after caesarean (VBAC) at home in England: secondary analysis of the Birthplace national prospective cohort study. *BJOG: An International Journal of Obstetrics & Gynaecology* 123:1123-32.

Salihu, H.M., August, E.M., de la Cruz, C., Mogos, M.F., Weldezelasse, H., Alio, A.P., 2013. Infant mortality and the risk of small size for gestational age in the subsequent pregnancy: a retrospective cohort study. *Maternal and Child Health Journal* 17:1044-51.

Salim, R., Mfra, A., Garmi, G., Shalev, E., 2012. Comparison of intrapartum outcome among immigrant women from Ethiopia and the general obstetric population in Israel. *International Journal of Gynecology & Obstetrics* 118:161-65.

Sandes, A.R., Nascimento, C., Figueira, J., Gouveia, R., Valente, S., Martins, S., Correia, S., Rocha, E., Da Silva, L.J., 2007. Breastfeeding: Prevalence and determinant factors. [Portuguese]. *Acta Medica Portuguesa* 20:193-200.

Sarrato, S.Z., Castro, S.V., Navarro, C.R., Sarrato, G.Z., Luna, M.S., 2017. Risks factors associated with intra-partum foetal mortality in pre-term infants. *Anales de Pediatría (English Edition)* 86:127-34.

Sayers, G., Donohue, F., McKeown, D., Mc Dermott, R., Cianci, F., Darker, C.D., Haase, T., Johnson, H., 2019. Analysis of low birth weight first-born babies by geography and deprivation as an aid to policy and service targeting. *Journal of Public Health* 25.

Schiller-Fruhvir, I., Mittermayr, T., Wild, C., 2010. [Neural tube defects in Austria: Assumption and calculations on the prevention potential through folic acid enrichment and supplementation]. [German]. *Gesundheitswesen (Bundesverband der Ärzte des Öffentlichen Gesundheitsdienstes (Germany))* 72:880-85.

Schneider, S., Freerksen, N., Maul, H., Roehrig, S., Fischer, B., Hoef, B., 2011. Risk groups and maternal-neonatal complications of preeclampsia - Current results from the national German Perinatal Quality Registry. *Journal of Perinatal Medicine* 39:257-65.

Scotland, H.I., 2014. Scottish Perinatal and infant mortality and morbidity report 2012. Edinburgh: Healthcare Improvement Scotland.

Scotland, I., 2015. Births in Scottish hospitals year ending 31 march 2015. Edited by Scotland ANSPF.

Scotland, I., 2018. Births in Scottish hospitals year ending 31 march 2018, Edited by Scotland ANSPF. Office of National Statistics.

Scotland, I., 2019a. Congenital anomalies in Scotland 2012 to 2017 National Services Scotland.

Scotland, I., 2019b. Termination of pregnancy Office of National Statistics, pp. 1-37.

Selling, K.E., Carstensen, J., Finnstrom, O., Sydsjo, G., 2006. Intergenerational effects of preterm birth and reduced intrauterine growth: a population-based study of Swedish mother-offspring pairs. *BJOG: An International Journal of Obstetrics & Gynaecology* 113:430-40.

Sengpiel, V., Bacelis, J., Myhre, R., Myking, S., Pay, A.D., Haugen, M., Brantsæter, A.-L., Meltzer, H.M., Nilsen, R.M., et al., 2013. Folic acid supplementation, dietary folate intake during pregnancy and risk for spontaneous preterm delivery: a prospective observational cohort study. *BMC Pregnancy and Childbirth* 13:13.

Sengpiel, V., Bacelis, J., Myhre, R., Myking, S., Pay, A.S.D., Haugen, M., Brantsæter, A.-L., Meltzer, H.M., Nilsen, R.M., et al., 2014. Folic acid supplementation, dietary folate intake during pregnancy and risk for spontaneous preterm delivery: a prospective observational cohort study. *BMC Pregnancy and Childbirth* 14:12.

Shaw, R.J., Bernard, R.S., Storfer-Isser, A., Rhine, W., Horwitz, S.M., 2013. Parental coping in the neonatal intensive care unit. *Journal of Clinical Psychology in Medical Settings* 20:135-42.

Shrivastava, A., Murrin, C., O'Brien, J., Viljoen, K., Heavey, P., Grant, T., Kelleher, C., 2012. Grandparental morbidity and mortality patterns are associated with infant birth weight in the Lifeways cross-generation cohort study 2001–2010. *Journal of Developmental Origins of Health and Disease* 3:458-68.

Simranpal, K., Ramandeep, K., Sonia, S., 2015. Assessment of the Pregnancy Outcome among Non Anemic and Anemic Mothers: a Comparative Study. *International Journal of Nursing Education* 7:236-41.

Smeeton, N.C., Rona, R.J., Dobson, P., Cochrane, R., Wolfe, C., 2004. Assessing the determinants of stillbirths and early neonatal deaths using routinely collected data in an inner city area. *BMC Medicine* 2:27.

Smith, G.C., Pell, J.P., Bobbie, R., 2003. Caesarean section and risk of unexplained stillbirth in subsequent pregnancy. *The Lancet* 362:1779-84.

Smith, G.C.S., Pell, J.P., Dobbie, R., 2003. Interpregnancy interval and risk of preterm birth and neonatal death: Retrospective cohort study: BMJ BMJ. *British Medical Journal* 327:313.

Smith, G.C.S., Shah, I., White, I.R., Pell, J.P., Crossley, J.A., Dobbie, R., 2006. Maternal and biochemical predictors of spontaneous preterm birth among nulliparous women: A systematic analysis in relation to the degree of prematurity. *International Journal of Epidemiology* 35:1169-77.

Sonneborn, D., Park, H.Y., Petrik, J., Kocan, A., Palkovicova, L., Trnovec, T., Nguyen, D., Hertz-Picciotto, I., 2008. Prenatal polychlorinated biphenyl exposures in eastern Slovakia modify effects of social factors on birthweight. *Paediatric and Perinatal Epidemiology* 22:202-13.

Spallek, J., Lehnhardt, J., Reeske, A., Razum, O., David, M., 2014. Perinatal outcomes of immigrant women of Turkish, Middle Eastern and North African origin in Berlin, Germany: a comparison of two time periods. *Archives of Gynecology & Obstetrics* 289:505-12.

Spangler, G., Grossmann, K., Grossmann, K.E., Fremmer-Bombik, E., 2000. Individual and social determinants of attachment security and disorganization. *Psychologie in Erziehung und Unterricht* 47:203-20.

Spencer, N., Wallace, A., Sundrum, R., Bacchus, C., Logan, S., 2006. Child abuse registration, fetal growth, and preterm birth: a population based study. *Journal of Epidemiology & Community Health* 60:337-40.

Statistics, O.f.N., 2011. Birth summary tables, England and Wales 2010. Office for National Statistics.

Stembera, Z., Velebil, P., 2000. Development of reproductive health in women in the Czech Republic 1993-1997. III. Induced abortion. [Czech]. *Ceska Gynekologie / Ceska lekarska spolecnost J Ev. Purkyne*. 65:243-49.

Stephenson, J., Heslehurst, N., Hall, J., Schoenaker, D.A., Hutchinson, J., Cade, J.E., Poston, L., Barrett, G., Crozier, S.R., et al., 2018. Before the beginning: nutrition and lifestyle in the preconception period and its importance for future health. *The Lancet* 391:1830-41.

Suliga, E., Adamczyk-Gruszka, O.K., 2015. Health behaviours of pregnant women and gestational weight gains -A pilot study. *Medical Studies/Studia Medyczne* 31:161-67.

Sundrum, R., Logan, S., Wallace, A., Spencer, N., 2005. Cerebral palsy and socioeconomic status: a retrospective cohort study. *Archives of Disease in Childhood* 90:15-18.

Talaber, J., Bachorec, M., Szemes, Z., Baji, I., Nagy, Z.Z., 2014. The effects of previous spontaneous abortion on the mental problems of current pregnancy. *New Medicine* 2014-January:98-102.

Taylor-Robinson, D., Agarwal, U., Diggle, P.J., Platt, M.J., Yoxall, B., Alfirevic, Z., 2011. Quantifying the impact of deprivation on preterm births: A retrospective cohort study. *PLoS One* 6 (8) (no pagination).

Taylor, B.D., Ness, R.B., Olsen, J., Hougaard, D.M., Skogstrand, K., Roberts, J.M., Haggerty, C.L., 2015. Serum leptin measured in early pregnancy is higher in women with preeclampsia compared with normotensive pregnant women. *Hypertension* 65:594-99.

Team, N.P., 2018. National Maternity and Perinatal Audit: Clinical Report 2017. Royal College of Obstetricians and Gynaecologists London.

Team, N.P., 2019. National Maternity and Perinatal Audit: Clinical Report 2019. RCOG, London.

Tollanes, M.C., Strandberg-Larsen, K., Eichelberger, K.Y., Moster, D., Lie, R.T., Brantsaeter, A.L., Meltzer, H.M., Stoltenberg, C., Wilcox, A.J., 2016. Intake of caffeinated soft drinks before and during pregnancy, but not total caffeine intake, is associated with increased cerebral palsy risk in the norwegian mother and child cohort study. *Journal of Nutrition* 146:1701-06.

Trabace, L., Tucci, P., Ciuffreda, L., Matteo, M., Fortunato, F., Campolongo, P., Trezza, V., Cuomo, V., 2015. natural relief of pregnancy-related symptoms and neonatal outcomes: Above all do no harm. *Journal of Ethnopharmacology* 174:396-402.

Trzcieńska-Green, A., Strzewiczek, A., Pawlak, A., 2012. Postnatal mental depression in two outpatient clinics in Katowice: Analysing frequency and risk factors. *Archives of Psychiatry and Psychotherapy* 14:37-44.

Tunstall, H., Pickett, K., Johnsen, S., 2010. Residential mobility in the UK during pregnancy and infancy: are pregnant women, new mothers and infants 'unhealthy migrants'? *Social Science & Medicine* 71:786-98.

Unterscheider, J., Ma'Ayeh, M., Geary, M.P., 2011. Born before arrival births: Impact of a changing obstetric population. *Journal of Obstetrics and Gynaecology* 31:721-23.

Urbaniak, T., Klejewski, A., Pisarska, M., Kostecka, E., 2012. [Influence of dietary supplementation on newborn weight]. [Polish]. *Przegląd Lekarski* 69:1015-20.

Urhoj, S.K., Andersen, P.K., Mortensen, L.H., Davey Smith, G., Nybo Andersen, A.M., 2017. Advanced paternal age and stillbirth rate: a nationwide register-based cohort study of 944,031 pregnancies in Denmark. *European Journal of Epidemiology* 32:227-34.

van Weert, B., van den Berg, D., Hruidey, J.E., Oostvogels, A.J.J.M., de Esteriek, M., Vrijkotte, T.G.M., 2016. Is first trimester vitamin D status in nulliparous women associated with pregnancy related hypertensive disorders? *Midwifery* 34:117-22.

Varea, C., Teran, J.M., Bernis, C., Bogin, B., 2018. The impact of delayed maternity on foetal growth in Spain: An assessment by population attributable fraction. *Women and Birth* 31:e190-e96.

Vella, A.M., Savona Ventura, C., Wolff, K., 2016. Pregnancy outcomes in substance-misusing pregnant women: A 10-year retrospective study. *Journal of Obstetrics & Gynaecology* 36:468-72.

Vikanes, A., Grijbovski, A.M., Vangen, S., Magnus, P., 2008. Length of residence and risk of developing hyperemesis gravidarum among first generation immigrants to Norway. *European Journal of Public Health* 18:460-65.

Vikat, B., Kosunen, E., Rimpela, M., 2002. Risk of postpartum induced abortion in Finland: a register-based study. *Perspectives on Sexual & Reproductive Health* 34:84-90.

Vranes, H.S., Djakovic, I., 2015. Length and weight of newborns in Croatia from 1985 to 2009. *Wiener Klinische Wochenschrift* 127:685-90.

Waage, C.W., Mdala, I., Jennum, A.K., Michelsen, T.M., Birkeland, K.I., Sletner, L., 2016. Ethnic differences in blood pressure from early pregnancy to postpartum: A Norwegian cohort study. *Journal of Hypertension* 34:1151-59.

Wahlberg, A., Röst, M., Haglund, B., Högberg, U., Essén, B., 2013. Increased risk of severe maternal morbidity (near-miss) among immigrant women in Sweden: a population register-based study. *BJOG: An International Journal of Obstetrics & Gynaecology* 120:1605-12.

Waldhoer, T., Klebermass-Schrehof, K., 2015. The impact of altitude on birth weight depends on further mother- and infant-related factors: A population-based study in an altitude range up to 1600 m in Austria between 1984 and 2013. *Journal of Perinatology* 35:689-94.

Wangel, A.M., Schei, B., Ryding, E.L., Ostman, M., Bidens Study, G., 2012. Mental health status in pregnancy among native and non-native Swedish-speaking women: a Bidens study. *Acta Obstetrica et Gynecologica Scandinavica* 91:1395-401.

Wei-Hong, Z., Alexander, S., Bouvier-Colle, M.-H., Macfarlane, A., 2005. Incidence of severe pre-eclampsia, postpartum haemorrhage and sepsis as a surrogate marker for severe maternal morbidity in a European population-based study: the MOMS-B survey. *BJOG* 112:89.

|                                                                                |                                                                                                                                                                                                                                                                                                                                                                                                                                                                                                                                                                                                                                                                                                                                                                                                                                                                                                                                                                                                                                                                                                                                                                                                                                                                                                                                                                                                                                                                                                                                                                                                                                                                                                                                                                                                                                                                                                                                                                                                                                                                                                                                                                                                                                                                                                                                                                                                                                                                                                                                                                                                                                                                                                                                                                                                                                                                                                                                                                                                                                                                                                                                                                                                                                                                                                                                                                                                                                                                                                                                                                                                                                                                                                                                                                                                                                                                                                                                                                                                                                                                                                                                                                                                                                                                                                                                                                                                                                                                                                                                                                                                                                                                                                                                                                                                                                                                                                                                                                                                                                                                                                                                                                                                                                                                                                                                                                                                                                                                                                                                                                                                                                                                                                                                                                                                                                                                                                                                                                                                                                                                                                                                                                                                                                                                                                          |
|--------------------------------------------------------------------------------|----------------------------------------------------------------------------------------------------------------------------------------------------------------------------------------------------------------------------------------------------------------------------------------------------------------------------------------------------------------------------------------------------------------------------------------------------------------------------------------------------------------------------------------------------------------------------------------------------------------------------------------------------------------------------------------------------------------------------------------------------------------------------------------------------------------------------------------------------------------------------------------------------------------------------------------------------------------------------------------------------------------------------------------------------------------------------------------------------------------------------------------------------------------------------------------------------------------------------------------------------------------------------------------------------------------------------------------------------------------------------------------------------------------------------------------------------------------------------------------------------------------------------------------------------------------------------------------------------------------------------------------------------------------------------------------------------------------------------------------------------------------------------------------------------------------------------------------------------------------------------------------------------------------------------------------------------------------------------------------------------------------------------------------------------------------------------------------------------------------------------------------------------------------------------------------------------------------------------------------------------------------------------------------------------------------------------------------------------------------------------------------------------------------------------------------------------------------------------------------------------------------------------------------------------------------------------------------------------------------------------------------------------------------------------------------------------------------------------------------------------------------------------------------------------------------------------------------------------------------------------------------------------------------------------------------------------------------------------------------------------------------------------------------------------------------------------------------------------------------------------------------------------------------------------------------------------------------------------------------------------------------------------------------------------------------------------------------------------------------------------------------------------------------------------------------------------------------------------------------------------------------------------------------------------------------------------------------------------------------------------------------------------------------------------------------------------------------------------------------------------------------------------------------------------------------------------------------------------------------------------------------------------------------------------------------------------------------------------------------------------------------------------------------------------------------------------------------------------------------------------------------------------------------------------------------------------------------------------------------------------------------------------------------------------------------------------------------------------------------------------------------------------------------------------------------------------------------------------------------------------------------------------------------------------------------------------------------------------------------------------------------------------------------------------------------------------------------------------------------------------------------------------------------------------------------------------------------------------------------------------------------------------------------------------------------------------------------------------------------------------------------------------------------------------------------------------------------------------------------------------------------------------------------------------------------------------------------------------------------------------------------------------------------------------------------------------------------------------------------------------------------------------------------------------------------------------------------------------------------------------------------------------------------------------------------------------------------------------------------------------------------------------------------------------------------------------------------------------------------------------------------------------------------------------------------------------------------------------------------------------------------------------------------------------------------------------------------------------------------------------------------------------------------------------------------------------------------------------------------------------------------------------------------------------------------------------------------------------------------------------------------------------------------------------------|
|                                                                                | <p>West, J., Lawlor, D.A., Fairley, L., Wright, J., 2014. Differences in socioeconomic position, lifestyle and health-related pregnancy characteristics between Pakistani and White British women in the Born in Bradford prospective cohort study: The influence of the woman's, her partner's and their parents' place of birth. <i>BMJ Open</i> 4 (6) (no pagination).</p> <p>Wikstrom, A.K., Gunnarsdottir, J., Cnattingius, S., 2012. The paternal role in pre-eclampsia and giving birth to a small for gestational age infant// a population-based cohort study. <i>BMJ Open</i> 2 (4) (no pagination).</p> <p>Winckelmans, E., Cox, B., Martens, E., Fierens, F., Nemery, B., Nawrot, T.S., 2015. Fetal growth and maternal exposure to particulate air pollution More marked effects at lower exposure and modification by gestational duration. <i>Environmental Research</i> 140:611-18.</p> <p>Winkel, S., Einsle, F., Pieper, L., Hoffer, M., Wittchen, H.U., Martini, J., 2015. Associations of anxiety disorders, depressive disorders and body weight with hypertension during pregnancy. <i>Archives of Women's Mental Health</i> 18:473-83.</p> <p>Xie, R.-h., Gaudet, L., Krewski, D., Graham, I.D., Walker, M.C., Wen, S.W., 2015. Higher Cesarean Delivery Rates are Associated with Higher Infant Mortality Rates in Industrialized Countries. <i>Birth: Issues in Perinatal Care</i> 42:62-69.</p> <p>Yaniv, S.S., Levy, A., Wiznitzer, A., Holcberg, G., Mazor, M., Sheiner, E., 2011. A significant linear association exists between advanced maternal age and adverse perinatal outcome. <i>Archives of Gynecology and Obstetrics</i> 283:755-59.</p> <p>YIP, K.W., 2019. Risk factors and pregnancy outcomes of term fetal growth restriction. <i>Hong Kong Journal of Gynaecology, Obstetrics and Midwifery</i>.</p> <p>Zasloff, E., Schytt, E., Waldenstrom, U., 2007. First time mothers' pregnancy and birth experiences varying by age. <i>Acta Obstetrica et Gynecologica Scandinavica</i> 86:1328-36.</p> <p>Zhang, W.H., Alexander, S., Bouvier-Colle, M.H., Macfarlane, A., Group, M.B., 2005. Incidence of severe pre-eclampsia, postpartum haemorrhage and sepsis as a surrogate marker for severe maternal morbidity in a European population-based study: the MOMS-B survey. <i>BJOG: An International Journal of Obstetrics &amp; Gynaecology</i> 112:89-96.</p> <p>Zile, I., Ebela, I., Rumba-Rozenfelde, I., 2019. Maternal Risk Factors for Stillbirth: A Registry-Based Study. <i>Medicina</i> 55:326.</p>                                                                                                                                                                                                                                                                                                                                                                                                                                                                                                                                                                                                                                                                                                                                                                                                                                                                                                                                                                                                                                                                                                                                                                                                                                                                                                                                                                                                                                                                                                                                                                                                                                                                                                                                                                                                                                                                                                                                                                                                                                                                                                                                                                                                                                                                                                                                                                                                                                                                                                                                                                                                                                                                                                                                                                                                                                                                                                                                                                                                                                                                                                                                                                                                                                                                                                                                                                                                                                                                                                                                                                                                                                                                                                                                                 |
| The paper reports aggregate-level measures of deprivation reported only (n=70) | <p>Agyemang, C., Vrijkotte, T.G.M., Droomers, M., van der Wal, M.F., Bonsel, G.J., Stronks, K., 2009. The effect of neighbourhood income and deprivation on pregnancy outcomes in Amsterdam, The Netherlands. <i>Journal of Epidemiology &amp; Community Health</i> 63:755-60.</p> <p>Alves, B., Sheikh, A., 2005. Investigating the relationship between affluence and elective caesarean sections. <i>BJOG: An International Journal of Obstetrics &amp; Gynaecology</i> 112:994-96.</p> <p>Balázs, P., Greczser, A., Rákóczi, I., Foley, K.L., 2018. Continued smoking versus spontaneous quitting among pregnant women living in a high risk environment. <i>Central European Journal of Public Health</i> 26:164-70.</p> <p>Balchin, I., Steer, P.J., 2007. Race, prematurity and immaturity. <i>Early Human Development</i> 83:749-54.</p> <p>Ban, L., Sprigg, N., Abdul Sultan, A., Nelson-Piercy, C., Bath, P.M., Ludvigsson, J.F., Stephansson, O., Tata, L.J., 2017. Incidence of First Stroke in Pregnant and Nonpregnant Women of Childbearing Age: A Population-Based Cohort Study From England. <i>Journal of the American Heart Association</i> 6:e004601.</p> <p>Becker-Grunig, T., Schneider, S., Sonntag, D., Jarczok, M.N., Philippi, H., De Bock, F., 2016. Parental Social Status and other determinants of quality of life and behavioral problems: An analysis of German preterm births between 1987-2004. [German]. <i>Bundesgesundheitsblatt, Gesundheitsforschung, Gesundheitsschutz</i> 59:166-80.</p> <p>Best, K.E., Seaton, S.E., Draper, E.S., Field, D.J., Kurinczuk, J.J., Manktelow, B.N., Smith, L.K., 2019. Assessing the deprivation gap in stillbirths and neonatal deaths by cause of death: A national population-based study. <i>Archives of Disease in Childhood: Fetal and Neonatal Edition</i>.</p> <p>Beyerlein, A., Koller, D., Ziegler, A.-G., Lack, N., Maier, W., 2016. Does charge-free screening improve detection of gestational diabetes in women from deprived areas: a cross-sectional study. <i>BMC Pregnancy &amp; Childbirth</i> 16:01-Jun.</p> <p>Bradshaw, J., Finch, N., Miles, J.N.V., Bradshaw, J., Finch, N., Miles, J.N.V., 2005. Deprivation and variations in teenage conceptions and abortions in England. <i>Journal of Family Planning &amp; Reproductive Health Care</i> 31:15-19.</p> <p>Bragg, F., Cromwell, D.A., Edozien, L.C., Guro-Urganci, I., Mahmood, T.A., Templeton, A., van der Meulen, J.H., 2010. Variation in rates of caesarean section among English NHS trusts after accounting for maternal and clinical risk: cross sectional study. <i>BMJ : British Medical Journal (Online)</i> 341:n.</p> <p>Coevoet, V., Fresson, J., Vieux, R., Jay, N., 2013. Socioeconomic Deprivation and Hospital Length of Stay: A New Approach Using Area-based Socioeconomic Indicators in Multilevel Models. <i>Medical Care</i> 51:548-54.</p> <p>Collier, A., Abraham, E.C., Armstrong, J., Godwin, J., Monteath, K., Lindsay, R., 2017. Reported prevalence of gestational diabetes in Scotland: The relationship with obesity, age, socioeconomic status, smoking and macrosomia, and how many are we missing? <i>Journal of Diabetes Investigation</i> 8:161-67.</p> <p>Conrad, D., 2012. Deprivation-based inequalities in under-18 conception rates and the proportion of under-18 conceptions leading to abortion in England, 1998-2010. <i>Journal of Public Health</i> 34:609-14.</p> <p>Convers, M., Langeron, A., Sass, C., Moulin, J.J., Augier, A., Varlet, M.N., Seffert, P., Chene, G., 2012. Is the socioeconomic deprivation EPICES score useful in obstetrics?. [French]. <i>Gynecologie Obstetrique et Fertilité</i> 40:208-12.</p> <p>Dadvand, P., de Nazelle, A., Figueras, F., Basagana, X., Su, J., Amoly, E., Jerrett, M., Vrijheid, M., Sunyer, J., et al., 2012. Green space, health inequality and pregnancy. <i>Environment International</i> 40:110-15.</p> <p>Dadvand, P., Sunyer, J., Basagana, X., Ballester, F., Lerbuxundi, A., Fernandez-Somoano, A., Estarlich, M., Garcia-Esteban, R., Mendez, M.A., et al., 2012. Surrounding greenness and pregnancy outcomes in four Spanish birth cohorts. <i>Environmental Health Perspectives</i> 120:1481-87.</p> <p>Dassios, T., Refaey, M., Kametas, N., Bhat, R., Greenough, A., 2018. Adverse neonatal outcomes and house prices in London. <i>Journal of Perinatal Medicine</i> 47:99-105.</p> <p>Dassios, T., Refaey, M., Kametas, N., Bhat, R., Greenough, A., 2019. Adverse neonatal outcomes and house prices in London. <i>Journal of Perinatal Medicine</i> 47:99-105.</p> <p>De Graaf, J.P., Ravelli, A.C.J., De Haan, M.A.M., Steegers, E.A.P., Bonsel, G.J., 2013. Living in deprived urban districts increases perinatal health inequalities. <i>Journal of Maternal-Fetal and Neonatal Medicine</i> 26:473-81.</p> <p>De Graaf, J.P., Ravelli, A.C.J., Wildschut, H.I.J., Denktas, S., Voorham, A.J.J., Bonsel, G.J., Steegers, E.A.P., 2008. Perinatal outcomes in the four largest cities and in deprived neighbourhoods in the Netherlands. [Dutch]. <i>Nederlands Tijdschrift voor Geneeskunde</i> 152:2734-40.</p> <p>de Groot, N., Birnie, E., Vermolen, J.H., Dorscheidt, J.J.A., Bonsel, G.J., 2018. The prevalence of adverse postnatal outcomes for mother and infant in the Netherlands. <i>PLoS One</i> 13 (9) (no pagination).</p> <p>Delpisheh, A., Kelly, Y., Rizwan, S., 2006. Socio-economic status, smoking during pregnancy and birth outcomes: an analysis of cross-sectional community studies in Liverpool (1993-2001). <i>Journal of Child Health Care</i> 10:140-48.</p> <p>Dickinson, H.O., Hutton, J.L., Greaves, L.H., Dummer, T.J.B., Parker, L., 2002. Deprivation and stillbirth risk in rural and urban areas. <i>Paediatric and Perinatal Epidemiology</i> 16:249-54.</p> <p>Dolk, H., Armstrong, B., Lachowycz, K., Vrijheid, M., Rankin, J., Abramsky, L., Boyd, P.A., Wellesley, D., 2010. Ambient air pollution and risk of congenital anomalies in England, 1991-1999. <i>Occupational and Environmental Medicine</i> 67:223-27.</p> <p>Dummer, T., Parker, L., 2005. Changing socioeconomic inequality in infant mortality in Cumbria. <i>Archives of Disease in Childhood</i> 90:157-62.</p> |

Dummer, T.J.B., Dickinson, H.O., Pearce, M.S., Charlton, M.E., Parker, L., 2000. Stillbirth risk with social class and deprivation: No evidence for increasing inequality. *Journal of Clinical Epidemiology* 53:147-55.

Fattore, G., Numerato, D., Peltola, M., Banks, H., Graziani, R., Heijink, R., Over, E., Klitkou, S.T., Fletcher, E., et al., 2015. Variations and Determinants of Mortality and Length of Stay of Very Low Birth Weight and Very Low for Gestational Age Infants in Seven European Countries. *Health Economics* 24:65-87.

Fiaschi, L., Nelson-Piercy, C., Deb, S., King, R., Tata, L.J., 2019. Clinical management of nausea and vomiting in pregnancy and hyperemesis gravidarum across primary and secondary care: a population-based study. *BJOG* 126:1201.

Freemantle, N., Wood, J., Griffin, C., Gill, P., Calvert, M.J., Shankar, A., Chambers, J., MacArthur, C., 2009. What factors predict differences in infant and perinatal mortality in primary care trusts in England? A prognostic model. *BMJ* (Online) 339:377-80.

Garcia-Subirats, I., ampeacuterez, G., ampograveria, Rodr, ampiacuteguez-Sanz, M., Salvador, J., ampiacuten, Jan, ampeacute, M., 2011. Recent immigration and adverse pregnancy outcomes in an urban setting in Spain. *Maternal and Child Health Journal* 15:561-69.

Garcia-Subirats, I., Perez, G., Rodriguez-Sanz, M., Munoz, D.R., Salvador, J., 2012. Neighborhood inequalities in adverse pregnancy outcomes in an urban setting in Spain: a multilevel approach. *Journal of Urban Health : bulletin of the New York Academy of Medicine* 89:447-63.

Gayral-Taminh, M., Daubisse-Marliac, L., Baron, M., Maurel, G., Reme, J.M., Grandjean, H., 2005. Social and demographic characteristics and perinatal risks for highly deprived mothers. [French]. *Journal de Gynecologie Obstetrique et Biologie de la Reproduction* 34:23-32.

Glinianaia, S.V., Ghosh, R., Rankin, J., Pearce, M.S., Parker, L., Pless-Mulloli, T., 2013. No improvement in socioeconomic inequalities in birthweight and preterm birth over four decades: a population-based cohort study. *BMC Public Health* 13:345-45.

Gray, R., Bonellie, S., Chalmers, J., Greer, I., Jarvis, S., Williams, C., 2008. Social inequalities in preterm birth in Scotland 1980–2003: findings from an area-based measure of deprivation. *BJOG: An International Journal of Obstetrics & Gynaecology* 115:82-90.

Guildea, Z.E.S., Fone, D.L., Dunstan, F.D., Sibert, J.R., Cartlidge, P.H.T., Guildea, Z.E., Cartlidge, P.H., 2001. Social deprivation and the causes of stillbirth and infant mortality. *Archives of Disease in Childhood* 84:307-10.

Guroi-Urganci, I., Cromwell, D.A., Edozien, L.C., Mahmood, T.A., Adams, E.J., Richmond, D.H., Templeton, A., Meulen, J.H., 2013. Third- and fourth-degree perineal tears among primiparous women in England between 2000 and 2012: time trends and risk factors. *BJOG* 120:1516.

Haggarty, P., Campbell, D.M., Duthie, S., Andrews, K., Hoad, G., Piyathilake, C., McNeill, G., 2009. Diet and deprivation in pregnancy. *British Journal of Nutrition* 101:1487-97.

Hannam, K., McNamee, R., Baker, P., Sibley, C., Agius, R., 2013. Maternal residential proximity to major roads in North West England and adverse pregnancy outcomes. *Journal of Occupational and Environmental Medicine* 55:1329-36.

Henroin, J.B., Vaissiere, M., Etaix, M., Dziurla, M., Radauceanu, A., Malard, S., Lafon, D., 2017. Deprivation, occupational hazards and perinatal outcomes in pregnant workers. *Occupational Medicine (Oxford, England)* 67:44-51.

Hesselman, S., Wikstrom, A.K., Skalkidou, A., Sundstrom-Poromaa, I., Wikman, A., 2019. Neighborhood deprivation and adverse perinatal outcomes in Sweden: A population-based register study. *Acta Obstetrica et Gynecologica Scandinavica* 98:1004-13.

Jacobs, M., Cooper, S.A., McGowan, R., Nelson, S.M., Pell, J.P., 2016. Pregnancy outcome following prenatal diagnosis of chromosomal anomaly: A record linkage study of 26,261 pregnancies. *PLoS One* 11 (12) (no pagination).

James, D.K., Telfer, F.M., Keating, N.A., Blair, M.E., Wilcox, M.A., Chilvers, C., 2000. Reduced fetal movements and maternal medication - New pregnancy risk factors for neurodevelopmental disability in childhood. *Journal of Obstetrics and Gynaecology* 20:226-34.

Janghorbani, M., Stenhouse, E., Millward, A., Jones, R.B., 2006. Neighborhood deprivation and preterm birth in Plymouth, UK. *The Journal of Maternal-Fetal & Neonatal Medicine* 19:85-91.

Jenkins, J., McCall, E., Gardner, E., 2009. Socioeconomic inequalities in neonatal intensive care admission rates. *Archives of Disease in Childhood. Fetal and Neonatal Edition* 94:F423.

Kershenbaum, A., Fu, B., Gilbert, R., 2017. Three decades of inequality in neonatal and early childhood mortality in singleton births in Scotland. *Journal of Public Health* 39:712-19.

Knowles, R.L., Ridout, D., Crowe, S., Bull, C., Wray, J., Tregay, J., Franklin, R.C., Barron, D.J., Cunningham, D., et al., 2017. Ethnic and socioeconomic variation in incidence of congenital heart defects. *Archives of Disease in Childhood* 102:496-502.

Kroll, M.E., Kurinczuk, J.J., Hollowell, J., MacFarlane, A., Li, Y., Quigley, M.A., 2019. Ethnic and socioeconomic variation in cause-specific preterm infant mortality by gestational age at birth: National cohort study. *Archives of Disease in Childhood: Fetal and Neonatal Edition*.

Kroll, M.E., Kurinczuk, J.J., Hollowell, J., MacFarlane, A., Li, Y., Quigley, M.A., 2019. Ethnic and socioeconomic variation in cause-specific preterm infant mortality by gestational age at birth: national cohort study. *Archives of Disease in Childhood-Fetal and Neonatal Edition:fetalneonatal-2018-316463*.

Kroll, M.E., Quigley, M.A., Kurinczuk, J.J., Dattani, N., Li, Y., Hollowell, J., 2018. Ethnic variation in unexplained deaths in infancy, including sudden infant death syndrome (SIDS), England and Wales 2006-2012: national birth cohort study using routine data. *Journal of Epidemiology and Community Health* 72:911-18.

Lorente, C., Cordier, S., Bergeret, A., De Walle, H.E., Goujard, J., Ayme, S., Knill-Jones, R., Calzolari, E., Bianchi, F., 2000. Maternal occupational risk factors for oral clefts. *Occupational Exposure and Congenital Malformation Working Group. Scandinavian Journal of Work, Environment & Health* 26:137-45.

Manning, D., Brewster, B., Bundred, P., 2005. Social deprivation and admission for neonatal care. *Archives of Disease in Childhood -- Fetal & Neonatal Edition* 90:F337-8.

McCall, S.J., Flett, G., Okpo, E., Bhattacharya, S., 2016. Who has a repeat abortion? Identifying women at risk of repeated terminations of pregnancy: analysis of routinely collected health care data. *The Journal of Family Planning and Reproductive Health Care* 42:133.

Moraitis, A., Oliver-Williams, C., Wood, A.M., Fleming, M., Pell, J., Smith, G., 2015. Previous caesarean delivery and the risk of unexplained stillbirth: retrospective cohort study and meta-analysis. *BJOG: An International Journal of Obstetrics & Gynaecology* 122:1467-74.

Moraitis, A.A., Wood, A.M., Fleming, M., Smith, G.C., 2014. Birth weight percentile and the risk of term perinatal death not due to congenital anomaly. *Obstetrics & Gynecology*:274-83.

Murphy, H.R., Steel, S.A., Roland, J.M., Morris, D., Ball, V., Campbell, P.J., Temple, R.C., 2011. Obstetric and perinatal outcomes in pregnancies complicated by Type 1 and Type 2 diabetes: influences of glycaemic control, obesity and social disadvantage. *Diabetic Medicine* 28:1060-67.

Nair, M., Kurinczuk, J.J., Knight, M., 2016. Establishing a national maternal morbidity outcome indicator in England: a population-based study using routine hospital data. *PLoS One* 11:e0153370.

|                                                       |                                                                                                                                                                                                                                                                                                                                                                                                                                                                                                                                                                                                                                                                                                                                                                                                                                                                                                                                                                                                                                                                                                                                                                                                                                                                                                                                                                                                                                                                                                                                                                                                                                                                                                                                                                                                                                                                                                                                                                                                                                                                                                                                                                                                                                                                                                                                                                                                                                                                                                                                                                                                                                                                                                                                                                                                                                                                                                                                                                                                                                                                                                                                                                                                                                                                                                                                                                                                                                                                                                                                                                                                                                                                                                                                                                                                                                                                                                                                                                                                                                                                                                                                                                                                                                                                                                                                                                                                                                                                                                                                                                                                                                                                                                                                                                                                                                                                                                                                                                                                                                                                                                                                                                                                                                                                                                                                                                                                                                                                                                                                                                                                                                                                                                                                                                                                                                                                                                                                                                                                                                                                                                                                                                                                                                                                                                                                                                                                                                                                                                                                                                                                                                                                                                                                                                                                                                                                                                                                                                                                                                                                                                                                                                                                                                                                                                                                                                                                                                                                                                                                                                                                                                                                                                                                                                                                                                                                                                                                                                                                                                                                                                                                                                           |
|-------------------------------------------------------|---------------------------------------------------------------------------------------------------------------------------------------------------------------------------------------------------------------------------------------------------------------------------------------------------------------------------------------------------------------------------------------------------------------------------------------------------------------------------------------------------------------------------------------------------------------------------------------------------------------------------------------------------------------------------------------------------------------------------------------------------------------------------------------------------------------------------------------------------------------------------------------------------------------------------------------------------------------------------------------------------------------------------------------------------------------------------------------------------------------------------------------------------------------------------------------------------------------------------------------------------------------------------------------------------------------------------------------------------------------------------------------------------------------------------------------------------------------------------------------------------------------------------------------------------------------------------------------------------------------------------------------------------------------------------------------------------------------------------------------------------------------------------------------------------------------------------------------------------------------------------------------------------------------------------------------------------------------------------------------------------------------------------------------------------------------------------------------------------------------------------------------------------------------------------------------------------------------------------------------------------------------------------------------------------------------------------------------------------------------------------------------------------------------------------------------------------------------------------------------------------------------------------------------------------------------------------------------------------------------------------------------------------------------------------------------------------------------------------------------------------------------------------------------------------------------------------------------------------------------------------------------------------------------------------------------------------------------------------------------------------------------------------------------------------------------------------------------------------------------------------------------------------------------------------------------------------------------------------------------------------------------------------------------------------------------------------------------------------------------------------------------------------------------------------------------------------------------------------------------------------------------------------------------------------------------------------------------------------------------------------------------------------------------------------------------------------------------------------------------------------------------------------------------------------------------------------------------------------------------------------------------------------------------------------------------------------------------------------------------------------------------------------------------------------------------------------------------------------------------------------------------------------------------------------------------------------------------------------------------------------------------------------------------------------------------------------------------------------------------------------------------------------------------------------------------------------------------------------------------------------------------------------------------------------------------------------------------------------------------------------------------------------------------------------------------------------------------------------------------------------------------------------------------------------------------------------------------------------------------------------------------------------------------------------------------------------------------------------------------------------------------------------------------------------------------------------------------------------------------------------------------------------------------------------------------------------------------------------------------------------------------------------------------------------------------------------------------------------------------------------------------------------------------------------------------------------------------------------------------------------------------------------------------------------------------------------------------------------------------------------------------------------------------------------------------------------------------------------------------------------------------------------------------------------------------------------------------------------------------------------------------------------------------------------------------------------------------------------------------------------------------------------------------------------------------------------------------------------------------------------------------------------------------------------------------------------------------------------------------------------------------------------------------------------------------------------------------------------------------------------------------------------------------------------------------------------------------------------------------------------------------------------------------------------------------------------------------------------------------------------------------------------------------------------------------------------------------------------------------------------------------------------------------------------------------------------------------------------------------------------------------------------------------------------------------------------------------------------------------------------------------------------------------------------------------------------------------------------------------------------------------------------------------------------------------------------------------------------------------------------------------------------------------------------------------------------------------------------------------------------------------------------------------------------------------------------------------------------------------------------------------------------------------------------------------------------------------------------------------------------------------------------------------------------------------------------------------------------------------------------------------------------------------------------------------------------------------------------------------------------------------------------------------------------------------------------------------------------------------------------------------------------------------------------------------------------------------------------------------------------------------------------------------------------|
|                                                       | <p>Norman, P., Gregory, I., Dorling, D., Baker, A., 2008. Geographical trends in infant mortality: England and Wales, 1970-2006, Health Statistics Quarterly. Office of National Statistics, p. 18.</p> <p>Oakley, L.L., Kurinczuk, J.J., Renfrew, M.J., Quigley, M.A., 2016. Breastfeeding in England: time trends 2005-2006 to 2012-2013 and inequalities by area profile. <i>Maternal &amp; Child Nutrition</i> 12:440-51.</p> <p>Oddie, S.J., Hammal, D., Richmond, S., Parker, L., 2005. Early discharge and readmission to hospital in the first month of life in the Northern Region of the UK during 1998: a case cohort study. <i>Archives of Disease in Childhood</i> 90:119-24.</p> <p>Opatowski, M., Blondel, B., Khoshnood, B., Saurel-Cubizolles, M.J., 2016. New index of social deprivation during pregnancy: results from a national study in France. <i>BMJ Open</i> 6:e009511.</p> <p>Pasupathy, D., Wood, A.M., Pell, J.P., Fleming, M., Smith, G.C., Pasupathy, D., Wood, A.M., Pell, J.P., Fleming, M., et al., 2009. Rates of and factors associated with delivery-related perinatal death among term infants in Scotland. <i>JAMA: Journal of the American Medical Association</i> 302:660-68.</p> <p>Pattenden, S., Casson, K., Cook, S., Dolk, H., 2011. Geographical variation in infant mortality, stillbirth and low birth weight in Northern Ireland, 1992-2002. <i>Journal of Epidemiology &amp; Community Health</i> 65:1159-65.</p> <p>Penn, N., Oteng-Ntim, E., Oakley, L.L., Doyle, P., 2014. Ethnic variation in stillbirth risk and the role of maternal obesity: analysis of routine data from a London maternity unit. <i>BMC Pregnancy and Childbirth</i> 14:404.</p> <p>Petersen, I., Collings, S.L., McCrea, R.L., Nazareth, I., Osborn, D.P., Cowen, P.J., Sammon, C.J., 2017. Antiepileptic drugs prescribed in pregnancy and prevalence of major congenital malformations: Comparative prevalence studies. <i>Clinical Epidemiology</i> 9:95-103.</p> <p>Pilkington, H., Blondel, B., Drewniak, N., Zeitlin, J., 2014. Where does distance matter? Distance to the closest maternity unit and risk of foetal and neonatal mortality in France. <i>European Journal of Public Health</i> 24:905-10.</p> <p>Poeran, J., Maas, A.F.G., Birnie, E., Denktas, S., Steegers, E.A.P., Bonsel, G.J., 2013. Social deprivation and adverse perinatal outcomes among Western and non-Western pregnant women in a Dutch urban population. <i>Social Science &amp; Medicine</i> 83:42-49.</p> <p>Posthumus, A.G., Birnie, E., van Veen, M.J., Steegers, E.A.P., Bonsel, G.J., 2016. An antenatal prediction model for adverse birth outcomes in an urban population: The contribution of medical and non-medical risks. <i>Midwifery</i> 38:78-86.</p> <p>Raisanen, S., Kramer, M.R., Gissler, M., Saari, J., Heinonen, S., 2014. Unemployment at municipality level is associated with an increased risk of small for gestational age births - a multilevel analysis of all singleton births during 2005-2010 in Finland. <i>International Journal for Equity in Health</i> 13 (1) (no pagination).</p> <p>Raum, E., Arabin, B., Schlaud, M., Walter, U., Schwartz, F.W., 2001. The impact of maternal education on intrauterine growth: A comparison of former West and East Germany. <i>International Journal of Epidemiology</i> 30:81-87.</p> <p>Ravelli, A.C.J., Jager, K.J., de Groot, M.H., Erwich, J., Rijninks-van Driel, G.C., Tromp, M., Eskes, M., Abu-Hanna, A., Mol, B.W.J., 2011a. Travel time from home to hospital and adverse perinatal outcomes in women at term in the Netherlands. <i>BJOG</i> 118:457.</p> <p>Ravelli, A.C.J., Tromp, M., Eskes, M., Droog, J.C., van der Post, J.A.M., Jager, K.J., Mol, B.W., Reitsma, J.B., 2011b. Ethnic differences in stillbirth and early neonatal mortality in The Netherlands. <i>Journal of Epidemiology and Community Health</i> 65:696-701.</p> <p>Rebollo, A.G., Montero, C.M., 2000. Perinatal variables and health inequalities in a health-care district in Caceres, Spain. [Spanish]. <i>Gaceta Sanitaria / S.E.S.P.A.S</i> 14:31-38.</p> <p>Rosicova, K., Madarasova Geckova, A., van Dijk, J.P., Kollarova, J., Rosic, M., Groothoff, J.W., 2011. Regional socioeconomic indicators and ethnicity as predictors of regional infant mortality rate in Slovakia. <i>International Journal of Public Health</i> 56:523-31.</p> <p>Schifano, P., Lallo, A., Asta, F., De Sario, M., Davoli, M., Michelozzi, P., 2013. Effect of ambient temperature and air pollutants on the risk of preterm birth, Rome 2001-2010. <i>Environment International</i> 61:77-87.</p> <p>Smith, G.C., Cordeaux, Y., White, I.R., Pasupathy, D., Missfelder-Lobos, H., Pell, J.P., Charnock-Jones, D.S., Fleming, M., 2008. The effect of delaying childbirth on primary cesarean section rates. <i>PLoS Medicine</i> 5:e144.</p> <p>Smith, G.C., Shah, I., White, I.R., Pell, J.P., Crossley, J.A., Dobbie, R., 2006a. Maternal and biochemical predictors of spontaneous preterm birth among nulliparous women: a systematic analysis in relation to the degree of prematurity. <i>International Journal of Epidemiology</i> 35:1169-77.</p> <p>Smith, G.C., Shah, I., White, I.R., Pell, J.P., Dobbie, R., 2006b. Previous preeclampsia, preterm delivery, and delivery of a small for gestational age infant and the risk of unexplained stillbirth in the second pregnancy: a retrospective cohort study, Scotland, 1992-2001. <i>American Journal of Epidemiology</i> 165:194-202.</p> <p>Smith, G.C.S., Pell, J.P., Cameron, A.D., Dobbie, R., Smith, G.C.S., Pell, J.P., Cameron, A.D., Dobbie, R., 2002. Risk of perinatal death associated with labor after previous cesarean delivery in uncomplicated term pregnancies. <i>JAMA: Journal of the American Medical Association</i> 287:2684-724.</p> <p>Smith, L.K., Budd, J.L.S., Field, D.J., Draper, E.S., 2011. Socioeconomic inequalities in outcome of pregnancy and neonatal mortality associated with congenital anomalies: population based study. <i>BMJ (British Medical Journal)</i> 343:301.</p> <p>Smith, L.K., Draper, E.S., Manktelow, B.N., Dorling, J.S., Field, D.J., 2007a. Socioeconomic inequalities in very preterm birth rates. <i>Archives of Disease in Childhood -- Fetal &amp; Neonatal Edition</i> 92:F11-4.</p> <p>Smith, L.K., Draper, E.S., Manktelow, B.N., Field, D.J., Smith, L.K., Draper, E.S., Manktelow, B.N., Field, D.J., 2007b. Deprivation and infection among spontaneous very preterm births. <i>Obstetrics &amp; Gynecology</i> 110:325-29.</p> <p>Sutan, R., Campbell, D., Prescott, G.J., Smith, W.C.S., 2010. The risk factors for unexplained antepartum stillbirths in Scotland, 1994 to 2003. <i>Journal of Perinatology</i> 30:311-18.</p> <p>Tennant, P., Rankin, J., Bell, R., 2011. Maternal body mass index and the risk of fetal and infant death: a cohort study from the North of England. <i>Human Reproduction</i> 26:1501-11.</p> <p>Tseng, P.-c., Puthuserry, T., Thind, A., 2019. A retrospective analysis of ethnic variations in the risk of preterm birth in an ethnically dense socially disadvantaged area. <i>BMJ open</i> 9:1-10.</p> <p>Wood, A.M., Pasupathy, D., Pell, J.P., Fleming, M., Smith, G.C.S., 2012. Trends in socioeconomic inequalities in risk of sudden infant death syndrome, other causes of infant mortality, and stillbirth in Scotland: population based study. <i>BMJ : British Medical Journal (Online)</i> 344:n.</p> <p>Yuan, W., Duffner, A.M., Chen, L., Hunt, L.P., Sellers, S.M., Bernal, A.L., 2010. Analysis of preterm deliveries below 35 weeks' gestation in a tertiary referral hospital in the UK. A case-control survey. <i>BMC Research Notes</i> 3:119.</p> <p>Zeitlin, J., Mortensen, L., Prunet, C., Macfarlane, A., Hindori-Mohangoo, A.D., Gissler, M., Szamotulska, K., van der Pal, K., Bolumar, F., et al., 2016. Socioeconomic inequalities in stillbirth rates in Europe: measuring the gap using routine data from the Euro-Peristat Project. <i>BMC Pregnancy &amp; Childbirth</i> 16:15-15.</p> |
| No health outcomes of relevance are described (n=434) | <p>Aasheim, V., Waldenstrom, U., Rasmussen, S., Espehaug, B., Schytt, E., 2014. Satisfaction with life during pregnancy and early motherhood in first-time mothers of advanced age: A population-based longitudinal study. <i>BMC Pregnancy and Childbirth</i> 14 (1) (no pagination).</p> <p>Aassve, A., Mazzucco, S., Mencarini, L., 2005. Childbearing and well-being: a comparative analysis of European welfare regimes. <i>Journal of European Social Policy</i> 15:283-99.</p>                                                                                                                                                                                                                                                                                                                                                                                                                                                                                                                                                                                                                                                                                                                                                                                                                                                                                                                                                                                                                                                                                                                                                                                                                                                                                                                                                                                                                                                                                                                                                                                                                                                                                                                                                                                                                                                                                                                                                                                                                                                                                                                                                                                                                                                                                                                                                                                                                                                                                                                                                                                                                                                                                                                                                                                                                                                                                                                                                                                                                                                                                                                                                                                                                                                                                                                                                                                                                                                                                                                                                                                                                                                                                                                                                                                                                                                                                                                                                                                                                                                                                                                                                                                                                                                                                                                                                                                                                                                                                                                                                                                                                                                                                                                                                                                                                                                                                                                                                                                                                                                                                                                                                                                                                                                                                                                                                                                                                                                                                                                                                                                                                                                                                                                                                                                                                                                                                                                                                                                                                                                                                                                                                                                                                                                                                                                                                                                                                                                                                                                                                                                                                                                                                                                                                                                                                                                                                                                                                                                                                                                                                                                                                                                                                                                                                                                                                                                                                                                                                                                                                                                                                                                                                     |

Abela, M.B., 2007. The impact of social support and other risk factors on drinking during pregnancy. *Dissertation Abstracts International: Section B: The Sciences and Engineering* 68:1916.

Abendroth, A.-K., Huffman, M.L., Treas, J., 2013. The Parity Penalty in Life Course Perspective: Motherhood and Occupational Status in 13 European Countries. *American Sociological Review* 78:993-1014.

Abrahamsson, A., Ejlertsson, G., 2000. Smoking patterns during pregnancy: differences in socioeconomic and health-related variables. *European Journal of Public Health* 10:208-13.

Abreu, S., Santos, P.C., Montenegro, N., Mota, J., 2017. Relationship between dairy product intake during pregnancy and neonatal and maternal outcomes among Portuguese women. *Obesity Research and Clinical Practice* 11:276-86.

Aceti, F., Aveni, F., Baglioni, V., Carluccio, G., Colosimo, D., Giacchetti, N., Marini, I., Meuti, V., Motta, P., et al., 2012. Perinatal and postpartum depression: From attachment to personality. A pilot study. *Journal of Psychopathology / Giornale di Psicopatologia* 18:328-34.

Agboado, G., Michel, E., Jackson, E., Verma, A., 2010. Factors associated with breastfeeding cessation in nursing mothers in a peer support programme in Eastern Lancashire. *BMC Pediatrics* 10 (no pagination).

Agnafors, S., Sydsjö, G., deKeyser, L., Svedin, C.G., 2013. Symptoms of Depression Postpartum and 12 years Later-Associations to Child Mental Health at 12 years of Age. *Maternal and Child Health Journal* 17:405-14.

Agnese Mauri, P., Soldi, M., Cortinovis, I., Bertora, F., Guerrini Contini, N.N., 2017. Italian women who did not intend to breastfeed: A descriptive study. *Breastfeeding Review* 25:13-23.

Agostini, F., Neri, E., Salvatori, P., Dellabartola, S., Bozicevic, L., Monti, F., 2015. Antenatal Depressive Symptoms Associated with Specific Life Events and Sources of Social Support Among Italian Women. *Maternal & Child Health Journal* 19:1131-41.

Ajetunmbi, O., Whyte, B., Chalmers, J., Fleming, M., Stockton, D., Wood, R., 2014. Informing the 'early years' agenda in Scotland: understanding infant feeding patterns using linked datasets. *Journal of Epidemiology & Community Health* 68:83-92.

Alarcon, G.C., 2013. Psychosomatic disorders in pregnancy. *Psiquis* 22:136-54.

Alati, R., Davey Smith, G., Lewis, S.J., Sayal, K., Draper, E.S., Golding, J., Fraser, R., Gray, R., 2013. Effect of Prenatal Alcohol Exposure on Childhood Academic Outcomes: Contrasting Maternal and Paternal Associations in the ALSPAC Study. *PLoS One* 8 (10) (no pagination).

Alderdice, F., McNeill, J., Rowe, R., Martin, D., Dornan, J., 2008. Inequalities in the reported offer and uptake of antenatal screening. *Public Health* 122:42-52.

Alderliesten, M.E., Vrijkotte, T.G.M., Wal, M.F.v.d., Bonsel, G.J., 2007. Late start of antenatal care among ethnic minorities in a large cohort of pregnant women. *BJOG* 114:1232.

Alexandre, C., Bomy, H., Bourdon, E., Truffert, P., Pierrat, V., 2007. Lactation counselling support provided to mothers of preterm babies who intend to breastfeed. Evaluation of an educational intervention in a level III perinatal unit. [French]. *Archives de Pédiatrie* 14:1413-19.

Alexopoulou, P., Evagelou, E., Mpakoula-Tzoumaka, C., Kyritsi-Koukoulari, E., 2018. Assessing anxiety and depression in parents of preterm infants. *Journal of Neonatal Nursing* 24:273-76.

Alfano, R., Guida, F., Galobardes, B., Chadeau-Hyam, M., Delplie, C., Ghantous, A., Henderson, J., Herceg, Z., Jain, P., et al., 2019. Socioeconomic position during pregnancy and DNA methylation signatures at three stages across early life: Epigenome-wide association studies in the ALSPAC birth cohort. *International Journal of Epidemiology* 48:30-44.

Almeida, L.M., Costa-Santos, C., Caldas, J.P., Dias, S., Ayres-de-Campos, D., 2016. The impact of migration on women's mental health in the postpartum period. *Revista de Saude Publica* 50.

Almond, D., Edlund, L., Joffe, M., Palme, M., 2016. An adaptive significance of morning sickness? Trivers-Willard and Hyperemesis Gravidarum. *Economics and Human Biology* 21:167-71.

Alves, E., Silva, S., Martins, S., Barros, H., 2015. Family structure and use of prenatal care. *Cadernos de Saude Publica* 31:1298-304.

Alvik, A., 2014. Variables predicting low infant developmental scores: Maternal age above 30 years is a main predictor. *Scandinavian Journal of Public Health* 42:113-19.

Alvik, A., Heyerdahl, S., Haldorsen, T., Lindemann, R., 2006. Alcohol use before and during pregnancy: a population-based study. *Acta Obstetrica et Gynecologica Scandinavica* 85:1292-8.

Amann, U., Egen-Lappe, V., Strunz-Lehner, C., Hasford, J., 2006. Antibiotics in pregnancy: Analysis of potential risks and determinants in a large German statutory sickness fund population. *Pharmacoepidemiology and Drug Safety* 15:327-37.

Amezcu-Prieto, C., Olmedo-Requena, R., Jiménez-Mejías, E., Hurtado-Sánchez, F., Mozas-Moreno, J., Lardelli-Claret, P., Jiménez-Moleón, J.J., 2013a. Changes in Leisure Time Physical Activity During Pregnancy Compared to the Prior Year. *Maternal and Child Health Journal* 17:632-38.

Amezcu-Prieto, C., Olmedo-Requena, R., Jiménez-Mejías, E., Mozas-Moreno, J., Lardelli-Claret, P., Jiménez-Moleón, J.J., 2013b. Factors associated with changes in leisure time physical activity during early pregnancy. *International Journal of Gynecology & Obstetrics* 121:127-31.

Amundsen, S., Ovrebø, T.G., Amble, N.M., Poole, A.C., Nordeng, H., 2016. Use of antimigraine medications and information needs during pregnancy and breastfeeding: a cross-sectional study among 401 Norwegian women. *European Journal of Clinical Pharmacology* 72:1525-35.

Andersson, P., Jansson, A., 2008. *Lakartidningen* 105:1476-79.

Anding, J.E., Rohrlé, B., Grieshop, M., Schucking, B., Christiansen, H., 2016. Couple comorbidity and correlates of postnatal depressive symptoms in mothers and fathers in the first two weeks following delivery. *Journal of Affective Disorders* 190:300-09.

Andrek, A., Kekecs, Z., Hadhazi, E., Boukydis, Z., Varga, K., 2016. Re-Evaluation of the Psychometric Properties of the Maternal-Fetal Attachment Scale in a Hungarian Sample. *Journal of Obstetric, Gynecologic, and Neonatal Nursing* 45:e15.

Anonymous, 2001. D. Supporting Early Postpartum Attachment. *The Journal of Perinatal Education* 10:35-50.

Apouey, B.H., Geoffard, P.Y., 2016. Parents' education and child body weight in France: The trajectory of the gradient in the early years. *Economics and Human Biology* 20:70-89.

Appleton, A.A., Armstrong, D.A., Lesseur, C., Lee, J., Padbury, J.F., Lester, B.M., Marsit, C.J., 2013. Patterning in Placental 11-B Hydroxysteroid Dehydrogenase Methylation According to Prenatal Socioeconomic Adversity. *PLoS One* 8 (9) (no pagination).

Araújo, P.L., de Andrade, R.B., da Silva, Y.L.R., de Araújo Silveira, M.d.F., 2015. SCREENING OF DEPRESSIVE SYMPTOMS IN PREGNANT WOMEN OF HIGH-RISK PRENATAL. *Journal of Nursing UFPE / Revista de Enfermagem UFPE* 9:599-603.

Arcamone, A.A., 2005. The effect of prenatal education on adaptation to motherhood after vaginal childbirth in primiparous women as assessed by Roy's four adaptive modes. *Widener University School of Nursing D.N.Sc.*:241 p-41 p.

Ardu, S., Grandolfo, M., 2009. Prevalence of breastfeeding and risk factors. A study on child delivering women attending Public Primary Maternal and Child Health Services in Cagliari area, Italy. [Italian]. *Medico e Bambino* 28:465-66.

Argalasova, L., Zitnanova, I., Vondrova, D., Dvorakova, M., Laubertova, L., Jurkovicova, J., Stofko, J., Weitzman, M., Waczulikova, I., et al., 2019. Self-reported exposure to ets (Environmental tobacco smoke), urinary cotinine, and oxidative stress parameters in pregnant women-the pilot study. *International Journal of Environmental Research and Public Health* 16 (9) (no pagination).

Argnani, L., Toselli, S., Gualdi-Russo, E., 2004. Chinese women in Italy - Menarche, pregnancy and maternity. *Collegium Antropologicum* 28:885-90.

Ariansen, A.M., 2014. Age, occupational class and sickness absence during pregnancy: a retrospective analysis study of the Norwegian population registry. *BMJ Open* 4:e004381.

Ariansen, A.M., Mykletun, A., 2014. Does postponement of first pregnancy increase gender differences in sickness absence? A register based analysis of Norwegian employees in 1993-2007. *PLoS One [Electronic Resource]* 9:e93006.

Arkkola, T., Uusitalo, U., Pietikäinen, M., Metsälä, J., Kronberg-Kippilä, C., Erkkola, M., Veijola, R., Knap, M., Virtanen, S.M., et al., 2006. Dietary intake and use of dietary supplements in relation to demographic variables among pregnant Finnish women. *British Journal of Nutrition* 96:1913-20.

Artieta-Pinedo, I., Paz-Pascual, C., Grandes, G., Bacigalupe, A., Payo, J., Montoya, I., 2013. Antenatal education and breastfeeding in a cohort of primiparas. *Journal of Advanced Nursing (John Wiley & Sons, Inc.)* 69:1607-17.

Aspberg, S., Dahlquist, G., Kahan, T., Kallen, B., 2006. Fetal and perinatal risk factors for inflammatory bowel disease. *Acta Paediatrica* 95:1001-4.

Asztalos, E.V., Church, P.T., Riley, P., Fajardo, C., Shah, P.S., 2017. Association between Primary Caregiver Education and Cognitive and Language Development of Preterm Neonates. *American Journal of Perinatology* 34:364-71.

Austin, M.P., Hadzi-Pavlovic, D., Leader, L., Saint, K., Parker, G., 2005. Maternal trait anxiety, depression and life event stress in pregnancy: Relationships with infant temperament. *Early Human Development* 81:183-90.

Axelsdottir, T.O., Sigurdsson, E.L., Gudmundsdottir, A.M., Kristjansdottir, H., Sigurdsson, J.A., 2014. Drug use during early pregnancy: Cross-sectional analysis from the Childbirth and Health Study in Primary Care in Iceland. *Scandinavian Journal of Primary Health Care* 32:139-45.

Azria, E., Guittet, L., Delahaye, M., Koskas, M., Naoura, I., Luton, D., Caputo, D.M., 2011. Improvement of first-trimester ultrasound screening in socially deprived settings through a community-based perinatal network. *European Journal of Obstetrics and Gynecology and Reproductive Biology* 159:351-54.

Backhausen, M.G., Bendix, J.M., Damm, P., Tabor, A., Hegaard, H.K., 2019. Low back pain intensity among childbearing women and associated predictors. A cohort study. *Women & Birth* 32:e467-e76.

Baglaj, M., Wojtylko, A., 2011. [Folic acid supplementation as prophylaxis of neural tube defect in the Lower Silesia region: fact or fiction?]. [Polish]. *Medycyna Wieku Rozwojowego* 15:501-06.

Bailey, B.A., Wright, H.N., 2011. Breastfeeding initiation in a rural sample: predictive factors and the role of smoking. *Journal of Human Lactation* 27:33-40.

Bailey, J., Clark, M., Shepherd, R., 2008. Duration of breastfeeding in young women: psychological influences. *British Journal of Midwifery* 16:172-78.

Baker, D., North, K., 1999. Does employment improve the health of lone mothers? *Social Science & Medicine* 49:121-31.

Baker, J.L., Michaelsen, K.F., Sorensen, T.I.A., Rasmussen, K.M., 2007. High prepregnant body mass index is associated with early termination of full and any breastfeeding in Danish women. *American Journal of Clinical Nutrition* 86:404-11.

Bakker, R., Steegers, E.A.P., Biharie, A.A., Mackenbach, J.P., Hofman, A., Jaddoe, V.W.V., 2011. Explaining differences in birth outcomes in relation to maternal age: the Generation R Study. *BJOG* 118:500.

Bakoula, C., Veltsista, A., Prezerakou, A., Moustaki, M., Fretzayas, A., Nicolaidou, P., 2007. Working mothers breastfeed babies more than housewives. *Acta Paediatrica, International Journal of Paediatrics* 96:510-15.

Ball, H.L., Howel, D., Bryant, A., Best, E., Russell, C., Ward-Platt, M., 2016. Bed-sharing by breastfeeding mothers: who bed-shares and what is the relationship with breastfeeding duration? *Acta Paediatrica* 105:628-34.

Ballon, M., Botton, J., Charles, M.A., Carles, S., de Lauzon-Guillain, B., Forhan, A., Cameron, A.J., Heude, B., Lioret, S., 2018. Socioeconomic inequalities in weight, height and body mass index from birth to 5 years. *International Journal of Obesity* 42:1671-79.

Balwicki, L., Smith, D.M., Pierucka, M., Goniewicz, M.L., Zarzezna-Baran, M., Jedrzejczyk, T., Strahl, M., Zdrojewski, T., 2017. Factors Associated With Quitting Among Smoking Pregnant Women From Small Town and Rural Areas in Poland. *Nicotine & Tobacco Research* 19:647-51.

Balwicki, Ł., Zarzezna-Baran, M., Wierucki, Ł., Jedrzejczyk, T., Strahl, M., Wrotkowska, M., Goniewicz, M., Zdrojewski, T., Goniewicz, M.L., 2016. Smoking among pregnant women in small towns in Poland. *International Journal of Public Health* 61:111-18.

Ban, L., Abdul Sultan, A., Stephansson, O., Tata, L.J., Sprigg, N., Nelson-Piercy, C., Bath, P.M., Ludvigsson, J.F., 2017. The incidence of first stroke in and around pregnancy: A population-based cohort study from Sweden. *European Stroke Journal* 2:250-56.

Baraka, M., Steurbaut, S., Coomans, D., Dupont, A.G., 2014. Determinants of medication use in a multi-ethnic population of pregnant women: A cross-sectional study. *European Journal of Contraception and Reproductive Health Care* 19:108-20.

Barclay, K., Myrskylä, M., 2016. Advanced Maternal Age and Offspring Outcomes: Reproductive Aging and Counterbalancing Period Trends. *Population and Development Review* 42:69-94.

Barker, D.J.P., Forsén, T., Uutela, A., Osmond, C., Eriksson, J.G., 2001. Size at birth and resilience to effects of poor living conditions in adult life: longitudinal study. *BMJ : British Medical Journal* 323:1273.

Baron, R., Mannien, J., de Jonge, A., Heymans, M.W., Klomp, T., Hutton, E.K., Brug, J., 2013. Socio-Demographic and Lifestyle-Related Characteristics Associated with Self-Reported Any, Daily and Occasional Smoking during Pregnancy. *PLoS One* 8 (9) (no pagination).

Baron, R., Mannien, J., Velde, S.J.t., Klomp, T., Hutton, E.K., Brug, J., 2015. Socio-demographic inequalities across a range of health status indicators and health behaviours among pregnant women in prenatal primary care: a cross-sectional study. *BMC Pregnancy and Childbirth* 15:11.

Barriere, H., Tanguy, M., Connan, L., Baron, C., Fanello, S., 2011. Prenatal breastfeeding information: Survey in Pays de Loire, France. [French]. *Archives de Pédiatrie* 18:945-54.

Battancs, E., Gorzo, I., Pal, A., Novak, T., Eller, J., Kokai, E.L., Radnai, M., 2011. [Pregnant women's oral hygiene knowledge and habits after the second millennium in South-East Hungary]. *Fogorvosi Szemle* 104:75-9.

Batten, L., Graham, H., High, S., Ruggiero, L., Rossi, J., 1999. Stage of change, low income and benefit status: a profile of women's smoking in early pregnancy. *Health Education Journal* 58:378-88.

Beauregard, J.L., Drews-Botsch, C., Sales, J.M., Flanders, W.D., Kramer, M.R., 2018. Preterm birth, poverty, and cognitive development. *Pediatrics* 141:e20170509.

Becheanu, C.A., Tincu, I.F., Lesanu, G., 2018. Feeding practices among romanian children in the first year of life. *Hong Kong Journal of Paediatrics* 23:13-19.

Beck, C.T., 2001. Predictors of postpartum depression. *Nursing Research* 50:275-85.

Becker, O.A., Lois, D., Nauck, B., 2010. Differences in Fertility Patterns between East and West German Women. Disentangling the roles of cultural background and of the transformation process. *Comparative Population Studies* 35:Jul-34.

Becker, S., Schmid, D., Amann-Gassner, U., Hauner, H., 2011. Use of nutritional supplements before and during pregnancy. *Ernährungs Umschau* 58:36-41.

Beeckman, K., Louckx, F., Putman, K., 2011. Predisposing, enabling and pregnancy-related determinants of late initiation of prenatal care. *Maternal and Child Health Journal* 15:1067-75.

Beeckman, K., Louckx, F., Putman, K., 2013. Content and timing of antenatal care: predisposing, enabling and pregnancy-related determinants of antenatal care trajectories. *European Journal of Public Health* 23:67-73.

Beijers, C., Ormel, J., Meijer, J.L., Verbeek, T., Bockting, C.L.H., Burger, H., 2014. Stressful events and continued smoking and continued alcohol consumption during mid-pregnancy. *PLoS One* 9 (1) (no pagination).

Beiqi, J., Jing, H., Yijing, W., Yun, F., Zhigang, Z., Liping, Z., Jiang, B., Hua, J., Wang, Y., et al., 2015. Evaluation of the impact of breast milk expression in early postpartum period on breastfeeding duration: a prospective cohort study. *BMC Pregnancy & Childbirth* 15:Jan-13.

Bell, K., Bloor, K., Hewitt, C., 2019. How Do Undiagnosed Symptoms of Maternal Psychological Distress During the Postnatal Period Affect Child Developmental Outcomes? *Maternal & Child Health Journal* 23:1187-95.

Bennett, I.M., Culhane, J.F., McCollum, K.F., Elo, I.T., Bennett, I.M., Culhane, J.F., McCollum, K.F., Elo, I.T., 2006. Unintended rapid repeat pregnancy and low education status: any role for depression and contraceptive use? *American Journal of Obstetrics & Gynecology* 194:749-54.

Berger, F., Goulet, V., Le Strat, Y., Desenclos, J.C., 2009. Toxoplasmosis among pregnant women in France: Risk factors and change of prevalence between 1995 and 2003. *Revue d'Epidemiologie et de Sante Publique* 57:241-48.

Bergmann, R.L., Gravens-Muller, L., Hertwig, K., Hinkel, J., Andres, B., Bergmann, K.E., Dudenhausen, J.W., 2002. Iron deficiency is prevalent in a sample of pregnant women at delivery in Germany. *European Journal of Obstetrics, Gynecology, & Reproductive Biology* 102:155-60.

Berninger, I., 2013. Women's income and childbearing in context: First births in Denmark and Finland. *Acta Sociologica* 56:97-115.

Berovic, N., 2003. Impact of Sociodemographic Features of Mothers on Breastfeeding in Croatia: Questionnaire Study. *Croatian Medical Journal* 44:596-600.

Bertini, G., Perugi, S., Dani, C., Pezzati, M., Tronchin, M., Rubaltelli, F.F., 2003. Maternal education and the incidence and duration of breast feeding: a prospective study. *Journal of Pediatric Gastroenterology & Nutrition* 37:447-52.

Betoko, A., Charles, M.A., Hankard, R., Forhan, A., Bonet, M., Regnault, N., Botton, J., Saurel-Cubizolles, M.J., de Lauzon-Guillain, B., 2014. Determinants of infant formula use and relation with growth in the first 4 months. *Maternal and Child Nutrition* 10:267-79.

Betoko, A., Charles, M.A., Hankard, R., Forhan, A., Bonet, M., Saurel-Cubizolles, M.J., Heude, B., de Lauzon-Guillain, B., 2013. Infant feeding patterns over the first year of life: influence of family characteristics. *European Journal of Clinical Nutrition* 67:631-37.

Bianco, A., Rocca, S., Nobile, C.G.A., Pileggi, C., Pavia, M., 2013. Postdischarge surveillance following delivery: The incidence of infections and associated factors. *American Journal of Infection Control* 41:549-53.

Biesmans, K., Franck, E., Ceulemans, C., Jacquemyn, Y., Van Bogaert, P., 2013. Weight during the postpartum period: what can health care workers do? *Maternal & Child Health Journal* 17:996-1004.

Bishop, C.F., Small, N., Parslow, R., Kelly, B., 2018. Healthcare use for children with complex needs: Using routine health data linked to a multiethnic, ongoing birth cohort. *BMJ Open* 8 (3) (no pagination).

Bishop, H., Cousins, W., Casson, K., Moore, A., 2008. Culture and caregivers: Factors influencing breastfeeding among mothers in West Belfast, Northern Ireland. *Child Care in Practice* 14:165-79.

Bjermo, H., Lind, S., Rasmussen, F., 2015. The educational gradient of obesity increases among Swedish pregnant women: a register-based study. *BMC Public Health* 15:315.

Bjørset, V.K., Helle, C., Hillesund, E.R., Øverby, N.C., 2018. Socio-economic status and maternal BMI are associated with duration of breast-feeding of Norwegian infants. *Public Health Nutrition* 21:1465-73.

Black, S.E., Devereux, P.J., Salvanes, K.G., 2008. Staying in the classroom and out of the maternity ward? The effect of compulsory schooling laws on teenage births. *Economic Journal* 118:1025-54.

Blair, P.S., Drewett, R.F., Emmett, P.M., Ness, A., Emond, A.M., 2004. Family, socioeconomic and prenatal factors associated with failure to thrive in the Avon Longitudinal Study of Parents and Children (ALSPAC). *International Journal of Epidemiology* 33:839-47.

Blair, P.S., Sidebotham, P., Berry, P.J., Evans, M., Fleming, P.J., 2006. Major epidemiological changes in sudden infant death syndrome: a 20-year population-based study in the UK. *The Lancet* 367:314-19.

Blanco Blanco, A.I., Burgos Cubero, L., Ruiz Pavón, M.C., 1999. The influence of health care education in the choice of breast feeding by puerperas, as the best option for feeding their children. *Enfermeria Clinica* 9:194-99.

Bleker, L.S., Roseboom, T.J., Vrijkotte, T.G., Reynolds, R.M., de Rooij, S.R., 2017. Determinants of cortisol during pregnancy - The ABCD cohort. *Psychoneuroendocrinology* 83:172-81.

Blom, E.A., Jansen, P.W., Verhulst, F.C., Hofman, A., Raat, H., Jaddoe, V.W.V., Coolman, M., Steegers, E.A.P., Tiemeier, H., 2010. Perinatal complications increase the risk of postpartum depression. The Generation R Study. *BJOG* 117:1390.

Bobak, M., Gjonca, A., 2001. The seasonality of live birth is strongly influenced by socio-demographic factors. *Human Reproduction* 16:1512-17.

Bodecs, T., Horvath, B., Kovacs, L., Diffelne Nemeth, M., Sandor, J., 2009. Prevalence of depression and anxiety in early pregnancy on a population based Hungarian sample. [Hungarian]. *Orvosi Hetilap* 150:1888-93.

Bodecs, T., Horvath, B., Szilagyi, E., Gonda, X., Rihmer, Z., Sandor, J., 2011. Effects of depression, anxiety, self-esteem, and health behaviour on neonatal outcomes in a population-based Hungarian sample. *European Journal of Obstetrics and Gynecology and Reproductive Biology* 154:45-50.

Bodecs, T., Mate, O., Horvath, B., Kovacs, L., Rihmer, Z., Sebestyen, B., Gonda, X., Sandor, J., 2010. Barriers of antenatal folate-supplementation: The role of depression and trait-anxiety on periconceptional folate-intake. *International Journal of Psychiatry in Clinical Practice* 14:102-08.

Bódecs, T., Szilágyi, E., Cholnoky, P., Horváth, B., 2012. The factor structure of the rosenberg self-esteem scale and its associations with depression, anxiety, social capital and demographic covariates in a sample of Hungarian pregnant women. *Handbook on Psychology of Self-Esteem*:313-25.

Bodecs, T., Szilagyi, E., Cholnoky, P., Sandor, J., Gonda, X., Rihmer, Z., Horvath, B., 2013. Prevalence and psychosocial background of anxiety and depression emerging during the first trimester of pregnancy: Data from a Hungarian population-based sample. *Psychiatria Danubina* 25:352-58.

Bogaerts, A., Van den Bergh, B., Nuyts, E., Martens, E., Witters, I., Devlieger, R., 2012. Socio-demographic and obstetrical correlates of pre-pregnancy body mass index and gestational weight gain. *Clinical Obesity* 2:150-59.

Bonet, M., Foix L'Helias, L., Blondel, B., 2008a. Exclusive and mixed breastfeeding in maternity unit: Situation in France in 2003. [French]. *Archives de Pédiatrie* 15:1407-15.

Bonet, M., Kaminski, M., Blondel, B., 2007. Differential trends in breastfeeding according to maternal and hospital characteristics: Results from the French National Perinatal Surveys. *Acta Paediatrica, International Journal of Paediatrics* 96:1290-95.

Bonet, M., L'Helias L, F., Blondel, B., 2008b. [Exclusive and mixed breastfeeding in a maternity unit in France, 2003]. *Archives de Pédiatrie* 15:1407-15.

Bonet, M., Marchand, L., Kaminski, M., Fohran, A., Betoko, A., Charles, M.-A., Blondel, B., 2013. Breastfeeding Duration, Social and Occupational Characteristics of Mothers in the French 'EDEN Mother-Child' Cohort. *Maternal and Child Health Journal* 17:714-22.

Börjesson, K., Ruppert, S., Bågedahl-Strindlund, M., 2005. A longitudinal study of psychiatric symptoms in primiparous women: relation to personality disorders and sociodemographic factors. *Archives of Women's Mental Health* 8:232.

Borle, M., Pande, V., Agarkhedkar, S.R., Singh, A., 2015. Study of breast feeding pattern in a tertiary care hospital. *Research Journal of Pharmaceutical, Biological and Chemical Sciences* 6:363-72.

Bosnjak, A.P., Grguric, J., Stanojevic, M., Sonicki, Z., 2009. Influence of sociodemographic and psychosocial characteristics on breastfeeding duration of mothers attending breastfeeding support groups. *Journal of Perinatal Medicine* 37:185-92.

Bouras, G., Mexi-Bourna, P., Bournas, N., Christodoulou, C., Daskalaki, A., Tasiopoulou, I., Poulous, A., 2013. Mothers' expectations and other factors affecting breastfeeding at six months in Greece. *Journal of Child Health Care : for professionals working with children in the hospital and community* 17:387-96.

Bourke, A., Kelleher, C., Boduszek, D., Morgan, K., 2015. Factors associated with crisis pregnancies in Ireland: findings from three nationally representative sexual health surveys. *Reproductive Health* 12:01-Nov.

Bournez, M., Ksiazek, E., Wagner, S., Kersuzan, C., Tichit, C., Gojard, S., Thierry, X., Charles, M.A., Lioret, S., et al., 2018. Factors associated with the introduction of complementary feeding in the French ELFE cohort study. *Maternal and Child Nutrition* 14 (2) (no pagination).

Bouthoorn, S.H., Van Lenthe, F.J., Gaillard, R., Hofman, A., Steegers, E.A.P., Jaddoe, V.W.V., Raat, H., 2014. Socioeconomic inequalities in placental vascular resistance: A prospective cohort study. *Fertility and Sterility* 101:1367-74.e4.

Bouthoorn, S.H., van Lenthe, F.J., Hokken-Koelega, A.C.S., Moll, H.A., Tiemeier, H., Hofman, A., Mackenbach, J.P., Jaddoe, V.W.V., Raat, H., 2012. Head circumference of infants born to mothers with different educational levels// the generation r study. *PLoS One* 7 (6) (no pagination).

Boyd, P.A., Armstrong, B., Dolk, H., Botting, B., Pattenden, S., Abramsky, L., Rankin, J., Vrijheid, M., Wellesley, D., 2005. Congenital anomaly surveillance in England--ascertainment deficiencies in the national system. *BMJ* 330:27.

Braig, S., Grabher, F., Ntomchukwu, C., Reister, F., Stalder, T., Kirschbaum, C., Genuweit, J., Rothenbacher, D., 2015. Determinants of maternal hair cortisol concentrations at delivery reflecting the last trimester of pregnancy. *Psychoneuroendocrinology* 52:289-96.

Bramsved, R., Regber, S., Novak, D., Mehlig, K., Lissner, L., Marild, S., 2018. Parental education and family income affect birthweight, early longitudinal growth and body mass index development differently. *Acta Paediatrica, International Journal of Paediatrics* 107:1946-52.

Brandenburg, J., Vrijotte, T.G.M., Goedhart, G., van Eijsden, M., 2012. Maternal Early-Pregnancy Vitamin D Status Is Associated With Maternal Depressive Symptoms in the Amsterdam Born Children and Their Development Cohort. *Psychosomatic Medicine* 74:751-57.

Brenne, S., Breckenkamp, J., Borde, T., David, M., Razum, O., 2018. Does the Degree of Acculturation Influence Breastfeeding Intention and Start or the Frequency of Early Weaning? Results of a Prospective Observational Study. *Geburtshilfe und Frauenheilkunde* 78:596-604.

Briody, J., Doyle, O., Kelleher, C., 2019. The Effect of the Great Recession on Health: A Longitudinal Study of Irish Mothers 2001-2011. University College Dublin, Dublin.

Brough, L., Rees, G.A., Crawford, M.A., Dorman, E.K., 2009. Social and ethnic differences in folic acid use during preconception and early pregnancy in the UK: effect on maternal folate status. *Journal of Human Nutrition & Dietetics* 22:100-07.

Brugier, C., Morel, O., Ricbourg, A., Brechat, P.H., Gayat, E., Barranger, E., 2012. Impact of precariousness on quality of prenatal detection: Lariboisiere hospital experience in Paris. [French]. *Journal de Gynecologie Obstetrique et Biologie de la Reproduction* 41:454-59.

Bunevicius, R., Kusminskas, L., Bunevicius, A., Nadisauskienė, R.J., Jureniene, K., Pop, V.J.M., 2009. Psychosocial risk factors for depression during pregnancy. *Acta Obstetrica et Gynecologica Scandinavica* 88:599-605.

Burguillo, M.P.T., Campos, Z.V., Marín Sánchez, C., Pedregal González, M., Muñoz Soriano, M.I., Álvarez Palacios, M.P., 2016. Prevalence of Breastfeeding in Huelva, duration and related factors. *Enfermería Global* 15:127-40.

Bussell, G., Marlow, N., 2000. The dietary beliefs and attitudes of women who have had a low-birthweight baby: a retrospective preconception study. *Journal of Human Nutrition & Dietetics* 13:29-39.

Byrn, M., Penckofer, S., 2015. The Relationship Between Gestational Diabetes and Antenatal Depression. *JOGNN: Journal of Obstetric, Gynecologic & Neonatal Nursing* 44:246-55.

Cairney, P., Barbour, R., 2007. A research study of sources of support for bottle feeding in new mothers. *Community Practitioner* 80:30-34.

Calling, S., Li, X., Sundquist, J., Sundquist, K., 2011. Socioeconomic inequalities and infant mortality of 46 470 preterm infants born in Sweden between 1992 and 2006. *Paediatric and Perinatal Epidemiology* 25:357-65.

Camarneiro, A.P.F., de Miranda Justo, J.M.R., 2017. Prenatal attachment and sociodemographic and clinical factors in Portuguese couples. *Journal of Reproductive & Infant Psychology* 35:212-22.

Carolan-Olah, M., Barry, M., 2014. Antenatal stress: An Irish case study. *Midwifery* 30:310-16.

Casavant, S.G., McGrath, J.M., Burke, G., Briere, C.-E., 2015. Caregiving Factors Affecting Breastfeeding Duration Within a Neonatal Intensive Care Unit. *Advances in Neonatal Care* 15:421-28.

Castro, P.D., Layte, R., Kearney, J., 2014. Ethnic variation in breastfeeding and complimentary feeding in the Republic of Ireland. *Nutrients* 6:1832-49.

CEMACH, 2006. Important information for general practitioners and the primary care team, in: Practitioners, R.C.O.G. (Ed.), London.

Cernigliaro, A., Palmeri, S., Immordino, P., Miceli, P., Pomo, R., Bosco, G., Cammarata, M.C., Canzonieri, G., Casuccio, N., et al., 2018. Breastfeeding in Sicily Region (Southern Italy): analysis of prevalence, of contextual inequalities, and of other associated risk factors. [Italian]. *Epidemiologia e Prevenzione* 42:301-07.

Cheung, R., 2018. International comparisons of health and wellbeing in early childhood. Royal College of Paediatrics and Child Health.

Chittleborough, C.R., Lawlor, D.A., Lynch, J.W., 2012. Prenatal prediction of poor maternal and offspring outcomes: implications for selection into intensive parent support programs. *Maternal and Child Health Journal* 16:909-20.

Cinelli, G., Fabrizi, M., Rava, L., Ciofi Degli Atti, M., Vernocchi, P., Vallone, C., Pietrantonio, E., Lanciotti, R., Signore, F., et al., 2016. Influence of Maternal Obesity and Gestational Weight Gain on Maternal and Foetal Lipid Profile. *Nutrients* 8:15.

Class, Q.A., Rickert, M.E., Larsson, H., Lichtenstein, P., D'Onofrio, B.M., 2014. Fetal growth and psychiatric and socioeconomic problems: population-based sibling comparison. *British Journal of Psychiatry* 205:355-61.

Coe, C., Ganas, A., Goularas, P., Kotzaeridou, U., Mouratidis, C., Papadimitriou, G., Spencer, N.J., 2005. Rates and social patterning of household smoking and breastfeeding in contrasting European settings. *Child: Care, Health and Development* 31:603-10.

Coletti, M.F., Caravale, B., Gasparini, C., Franco, F., Campi, F., Dotta, A., 2015. One-year neurodevelopmental outcome of very and late preterm infants: Risk factors and correlation with maternal stress. *Infant Behavior & Development* 39:Nov-20.

Colodro-Conde, L., Sanchez-Romera, J.F., Tornero-Gomez, M.J., Perez-Riquelme, F., Polo-Tomas, M., Ordonana, J.R., 2011. Relationship between level of education and breastfeeding duration depends on social context: breastfeeding trends over a 40-year period in Spain. *Journal of Human Lactation : official journal of International Lactation Consultant Association* 27:272-78.

Colombo, L., Crippa, B.L., Consonni, D., Bettinelli, M.E., Agosti, V., Mangino, G., Bezze, E.N., Mauri, P.A., Zanotta, L., et al., 2018. Breastfeeding Determinants in Healthy Term Newborns. *Nutrients* 10:5.

Compte, C., Magret, A., Sabench, C., Sánchez, J., Redondo, J., Cano, A., Prades, L., Puig, D., Suñer-Soler, R., 2015. Modelo de atención al parto dirigido por matronas frente al dirigido por matronas y obstetras en el Hospital Dr. Josep Trueta de Girona. *Matronas Profesion* 16:54-60.

Conde, A., Figueiredo, B., Tendais, I., Pereira, A.F., Afonso, E., Nogueira, R., 2008. Fetal growth and activity at 20 to 24 weeks of gestation (preliminary study). [Portuguese]. *Acta Medica Portuguesa* 21:55-64.

Conroy, S., Marks, M.N., 2003. Maternal psychological vulnerability and early infant care in a sample of materially disadvantaged women. *Journal of Reproductive and Infant Psychology* 21:May-22.

Cordero, L., Oza-Frank, R., Landon, M.B., Nankervis, C.A., 2015. Breastfeeding Initiation among Macrosomic Infants Born to Obese Nondiabetic Mothers. *Breastfeeding Medicine* 10:239-45.

Cornish, A.M., McMahon, C.A., Ungerer, J.A., Barnett, B., Kowalenko, N., Tennant, C., 2005. Postnatal depression and infant cognitive and motor development in the second postnatal year: The impact of depression chronicity and infant gender. *Infant Behavior and Development* 28:407-17.

Correia, N., Ekbo, A., Granath, F., Helstrom, L., Johansson, M., Odling, V., Zatterstrom, C., 2003. Abortion rate and contraceptive practices in immigrant and native women in Sweden. *Scandinavian Journal of Public Health* 31:405-10.

Coste, J., Bouyer, J., Job-Spira, N., 2004. Maternal life events and adverse pregnancy outcomes: Lessons from the Auvergne ectopic pregnancy registry. *Fertility and Sterility* 81:137-48.

Coton, S.J., Nazareth, I., Petersen, I., 2016. A cohort study of trends in the prevalence of pregestational diabetes in pregnancy recorded in UK general practice between 1995 and 2012. *BMJ Open* 6 (1) (no pagination).

Crippa, B.L., Colombo, L., Morniroli, D., Consonni, D., Bettinelli, M.E., Spreafico, I., Vercesi, G., Sannino, P., Mauri, P.A., et al., 2019. Do a Few Weeks Matter? Late Preterm Infants and Breastfeeding Issues. *Nutrients* 11:312.

Cruise, S.M., Layte, R., Stevenson, M., O'Reilly, D., 2018. Prevalence and factors associated with depression and depression-related healthcare access in mothers of 9-month-old infants in the Republic of Ireland. *Epidemiology and Psychiatric Sciences* 27:468-78.

Cryan, E., Koeogh, F., Connolly, E., Cody, S., Quinlan, A., Daly, I., 2001. Depression among postnatal women in an urban Irish community. *Irish Journal of Psychological Medicine* 18:05-Oct.

Cuadron Andres, L., Samper Villagrasa, M.P., Alvarez Sauras, M.L., Lasarte Velillas, J.J., Rodriguez Martinez, G., 2013. Breastfeeding prevalence during the first year of life in Aragon. CALINA study. [Spanish]. *Anales de Pediatría* 79:312-18.

Cupul-Uicab, L.A., Skjaerven, R., Haug, K., Melve, K.K., Engel, S.M., Å Longnecker, Matthew P., 2012. In Utero Exposure to Maternal Tobacco Smoke and Subsequent Obesity, Hypertension, and Gestational Diabetes Among Women in the MoBa Cohort. *Environmental Health Perspectives* 120:355-60.

Currie, A., Shields, M.A., Price, S.W., 2007. The child health/family income gradient: Evidence from England. *Journal of Health Economics* 26:213-32.

D'Avanzo, C.E., Barab, S.A., 2000. Drinking during pregnancy: practices of Cambodian refugees in France and the United States. *Health Care for Women International* 21:319-34.

Dagklis, T., Tsakiridis, I., Chouliara, F., Mamopoulos, A., Rouso, D., Athanasiadis, A., Papazisis, G., 2018. Antenatal depression among women hospitalized due to threatened preterm labor in a high-risk pregnancy unit in Greece. *Journal of Maternal-Fetal and Neonatal Medicine* 31:919-25.

Daniel, C.P., Fisher, A., Parker, L., Burn, J., Tawn, E.J., 2000. Individual variation in somatic mutations of the glycophorin-A gene in neonates in relation to pre-natal factors. *Mutation Research - Genetic Toxicology and Environmental Mutagenesis* 467:153-59.

Dayan, J., Creveuil, C., Marks, M.N., Conroy, S., al., e., 2006. Prenatal Depression, Prenatal Anxiety, and Spontaneous Preterm Birth: A Prospective Cohort Study Among Women With Early and Regular Care. *Psychosomatic Medicine* 68:938.

De Falco, S., Emer, A., Martini, L., Rigo, P., Pruner, S., Venuti, P., 2014. Predictors of mother-child interaction quality and child attachment security in at-risk families. *Frontiers in Psychology* 5.

De Jonge, A., Rijnders, M.E.B., Van Diem, M.T., Scheepers, P.L.H., Lagro-Janssen, A.L.M., 2009. Are there inequalities in choice of birthing position?: Sociodemographic and labour factors associated with the supine position during the second stage of labour. *Midwifery* 25:439-48.

Desseauve, D., Chantrel, J., Fruchart, A., Khoshnood, B., Brabant, G., Ancel, P.Y., Subtil, D., 2012. Prevalence and risk factors of bacterial vaginosis during the first trimester of pregnancy in a large French population-based study. *European Journal of Obstetrics & Gynecology & Reproductive Biology* 163:30-34.

Di Carlo, C., Savoia, F., Ferrara, C., Sglavo, G., Tommaselli, G.A., Giampaolino, P., Cagnacci, A., Nappi, C., 2016. In patient medical abortion versus surgical abortion: patient's satisfaction. *Gynecological Endocrinology* 32:650-54.

Dias Nunes, R., de Vasconcelos Mapelli, A., Nazário, N.O., Traebert, E., Seemann, M., Traebert, J., 2019. Avaliacao dos fatores determinantes a realizacao o da episiotomia no parto vaginal Enfermagem em Foco 10:71-75.

Diaz, M., Amato, R., Chavez, J.G., Ramirez, M., Rangel, S., Rivera, L., Lopez, J., 2013. Depression and anxiety in pregnant women. *Salus* 17:32-40.

Economou, M., Kolokotroni, O., Paphiti-Demetriou, I., Kouta, C., Lambrinou, E., Hadjigeorgiou, E., Hadjiona, V., Tryfonos, F., Philippou, E., et al., 2018. Prevalence of breast-feeding and exclusive breast-feeding at 48 h after birth and up to the sixth month in Cyprus: the BrEaST start in life project. *Public Health Nutrition* 21:967-80.

Edge, D., 2007. Ethnicity, psychosocial risk, and perinatal depression-a comparative study among inner-city women in the United Kingdom. *Journal of Psychosomatic Research* 63:291-95.

Eggert, J., Li, X., Sundquist, K., 2008. Country of birth and hospitalization for pelvic inflammatory disease, ectopic pregnancy, endometriosis, and infertility: a nationwide study of 2 million women in Sweden. *Fertility and Sterility* 90:1019-25.

Eggert, J., Sundquist, K., 2006. Socioeconomic factors, country of birth, and years in Sweden are associated with first birth fertility trends during the 1990s: A national cohort study. *Scandinavian Journal of Public Health* 34:504-14.

Ekeus, C., Cnattingius, S., Hjern, A., 2010. Epidural analgesia during labor among immigrant women in Sweden. *Acta Obstetrica et Gynecologica Scandinavica* 89:243-9.

El Metwalli, A.G.A., Badawy, A.M., El Baghdadi, L.A., El Wehady, A., 2001. Occupational physical activity and pregnancy outcome. *European Journal of Obstetrics & Gynecology and Reproductive Biology* 100:41-45.

Ellila, P., Laitinen, L., Nurmi, M., Rautava, P., Koivisto, M., Polo-Kantola, P., 2018. Nausea and vomiting of pregnancy: A study with pregnancy-unique quantification of emesis questionnaire. *European Journal of Obstetrics and Gynecology and Reproductive Biology* 230:60-67.

Fairley, L., 2005. Changing patterns of inequality in birthweight and its determinants: A population-based study, Scotland 1980-2000. *Paediatric and Perinatal Epidemiology* 19:342-51.

Faisal-Cury, A., Menezes, P.R., 2006. Postpartum anxiety: Prevalence and risk factors. *Revista Brasileira de Ginecologia e Obstetricia* 28:171-78.

Faisal-Cury, A., Menezes, P.R., Tedesco, J.J.A., Kahalle, S., Zugaib, M., 2008. Maternity blues: Prevalence and risk factors. *The Spanish Journal of Psychology* 11:593-99.

Fernandes Moll, M., Matos, A., de Aquino Rodrigues, T., da Silva Martins, T., Pires, F.C., Alves da Silva Pires, N., 2019. Tracking postpartum depression in young women *Journal of Nursing UFPE / Revista de Enfermagem UFPE* 13:1338-44.

Fiala, A., Svancara, J., Klanova, J., Kasperek, T., 2017. Sociodemographic and delivery risk factors for developing postpartum depression in a sample of 3233 mothers from the Czech ELSPAC study. *BMC Psychiatry* 17 (1) (no pagination).

Finnbogadóttir, H., Dykes, A.-K., Wann-Hansson, C., 2014. Prevalence of domestic violence during pregnancy and related risk factors: a cross-sectional study in southern Sweden. *BMC Women's Health* 14:13.

Fiona, M., 2008. Obstetric early warning chart, in: 19, C. (Ed.). NHS Forth Valley.

Fitzsimons, E., Vera-Hernandez, M., 2016. Breast feeding and the weekend effect: an observational study. *BMJ Open* 6:e010016.

Flanagan, C.F., Stewart, M., 2014. Factors associated with early neonatal attendance to a paediatric emergency department. *Archives of Disease in Childhood* 99:239-43.

Fleming, P.J., Blair, P.S., Ward Platt, M., Tripp, J., Smith, I.J., Group, C.S.R., 2003. Sudden infant death syndrome and social deprivation: assessing epidemiological factors after post-matching for deprivation. *Paediatric and Perinatal Epidemiology* 17:272-80.

Fonseca, A., Gorayeb, R., Canavarro, M.C., 2015. Women's help-seeking behaviours for depressive symptoms during the perinatal period: Socio-demographic and clinical correlates and perceived barriers to seeking professional help. *Midwifery* 31:1177-85.

Fonseca, M.J., Severo, M., Barros, H., Santos, A.C., 2014. Determinants of Weight Changes During the First 96 Hours of Life in Full-Term Newborns. *Birth* 41:160-68.

Fonseca, M.O., Tavares, D.M.S., Rodrigues, L.R., 2009. Investigation of indicative factors of postpartum depression in two groups of mothers. *Ciencia, Cuidado e Saude* 8:321-28.

Furman, L., Minich, N., Hack, M., 2002. Correlates of lactation in mothers of very low birth weight infants. *Pediatrics* 109:e57.

Gaillard, A., Le Strat, Y., Mandelbrot, L., Keita, H., Dubertret, C., 2014. Predictors of postpartum depression: Prospective study of 264 women followed during pregnancy and postpartum. *Psychiatry Research* 215:341-46.

Gaillard, R., Durmus, B., Hofman, A., Mackenbach, J.P., Steegers, E.A.P., Jaddoe, V.W.V., Durmus, B., 2013. Risk factors and outcomes of maternal obesity and excessive weight gain during pregnancy. *Obesity* (19307381) 21:1046-55.

Gaillard, R., Eilers, P.H.C., Yassine, S., Hofman, A., Steegers, E.A.P., Jaddoe, V.W.V., 2014. Risk Factors and Consequences of Maternal Anaemia and Elevated Haemoglobin Levels during Pregnancy: a Population-Based Prospective Cohort Study. *Paediatric & Perinatal Epidemiology* 28:213-26.

Garcia-esteve, L., Navarro, P., Ascaso, C., Torres, A., Aguado, J., Gelabert, E., Martín-santos, R., 2008. Family caregiver role and premenstrual syndrome as associated factors for postnatal depression. *Archives of Women's Mental Health* 11:193-200.

Giovannini, M., Riva, E., Banderali, G., Salvioni, M., Radaelli, G., Agostoni, C., 2005. Breastfeeding across geographical areas in an Italian sample of infants. *Italian Journal of Pediatrics* 31:44-51.

Glangeaud-Freudenthal, N.M., Crost, M., Kaminski, M., 1999. Severe post-delivery blues: Associated factors. *Archives of Women's Mental Health* 2:37-44.

Glasser, S., Stoski, E., Knelser, V., Magnezi, R., 2011. Postpartum depression among Israeli Bedouin women. *Archives of Women's Mental Health* 14:203-08.

Glazier, R., Elgar, F., Goel, V., Holzapfel, S., 2004. Stress, social support and emotional distress in a community sample of pregnant women. *Journal of Psychosomatic Obstetrics & Gynecology* 25:247-55.

Goker, A., Yanikkerem, E., Demet, M.M., Dikayak, S., Yildirim, Y., Koyuncu, F.M., 2012. Postpartum depression: Is mode of delivery a risk factor? *ISRN Obstetrics and Gynecology* (no pagination).

Gómez, V.C., Vinuesa, M.d.C.P., Martínez, F.S., Ruiz-Cabello, F.J.S., 2018. Factores que influyen en el inicio y mantenimiento de la lactancia materna exclusiva. *Metas de Enfermería* 21:21-26.

Goncalves, A.V.A.S., 2017. What influences women to bottle-feed from birth and to discontinue breastfeeding early? *British Journal of Midwifery* 25:442-50.

Gondwe, K.W., White-Traut, R., Brandon, D., Pan, W., Holditch-Davis, D., 2017. The role of sociodemographic factors in maternal psychological distress and mother-preterm infant interactions. *Research in Nursing & Health* 40:528-40.

Gonthier, C., Estellat, C., Deneux-Tharaux, C., Blondel, B., Alfaïate, T., Schmitz, T., Oury, J.-F., Mandelbrot, L., Luton, D., et al., 2017. Association between maternal social deprivation and prenatal care utilization: the PreCARE cohort study. *BMC Pregnancy & Childbirth* 17:01-Nov.

González Huéscar, A., Martínez Roa, C., Llorido Cano, I., Cubero Santos, A., Maynar Mariño, M.Á., Gil Martínez, C.M., 2018. Situación actual de la lactancia materna en una zona de salud urbana y factores que la condicionan. *Nure Investigación* 15:Jan-14.

Gray, R., Headley, J., Oakley, L., Kurinczuk, J., Brocklehurst, P., Hollowell, J., 2009. Inequalities in infant mortality project briefing paper 3. Towards an understanding of variations in infant mortality rates between different ethnic groups in England & Wales. Oxford: National Perinatal Epidemiology Unit.

Gremigni, P., Mariani, L., Marracino, V., Tranquilli, A.L., Turi, A., 2011. Partner support and postpartum depressive symptoms. *Journal of Psychosomatic Obstetrics and Gynecology* 32:135-40.

Griffiths, L.J., Tate, A.R., Dezateux, C., 2007. Do early infant feeding practices vary by maternal ethnic group? *Public Health Nutrition* 10:957-64.

Griffiths, L.J., Tate, A.R., Dezateux, C., Peckham, C., Law, C., Butler, N., Barlington, S., Walton, S., Cole, T., et al., 2005. The contribution of parental and community ethnicity to breastfeeding practices: Evidence from the Millennium Cohort Study. *International Journal of Epidemiology* 34:1378-86.

Grøtvedt, L., Kvalvik, L.G., Grøholt, E.-K., Akerkar, R., Egeland, G.M., 2017. Development of Social and Demographic Differences in Maternal Smoking Between 1999 and 2014 in Norway. *Nicotine & Tobacco Research* 19:539-46.

Group, I.E.H., 2018. Ireland East Hospital Group Annual Report 2018 Ireland East Hospital Group.

Grube, M., Keitel-Korndörfer, A., Bergmann, S., Wendt, V., von Klitzing, K., Petroff, D., 2016. Breastfeeding in Obese versus Normal-Weight German Mothers of Various Socioeconomic Status. *Journal of Human Lactation* 32:546-50.

Gumuff, A.B., Keskin, G., Alp, N., Ozyar, S., Karsak, A., 2012. The prevalence of postpartum depression and associated variables. *Yeni Symposium* 50:145-54.

Guszkowska, M., Langwald, M., Zaremba, A., Dudziak, D., 2014. The correlates of mental health of well-educated Polish women in the first pregnancy. *Journal of Mental Health* 23:328-32.

Guyer, J., J. Millward, L., Berger, I., 2012. Mothers' breastfeeding experiences and implications for professionals. *British Journal of Midwifery* 20:724-33.

Gynaecologists, R.C.o.O.a., 2018. RCOG response to new study into folic acid fortification.

Hadar, A., Rabinovich, A., Sheiner, E., Landau, D., Hallak, M., Mazor, M., 2005. Obstetric characteristics and neonatal outcome of unplanned out-of-hospital term deliveries: a prospective, case-control study. *Journal of Reproductive Medicine* 50:832-36.

Halvorsen, M.K., Langeland, E., Almenning, G., Haugland, S., Irgens, L.M., Markestad, T., Sollesnes, R., 2015. Breastfeeding surveyed using routine data. *Tidsskrift for Den Norske Laegeforening* 135:236-41.

Hawkins, S.S., Griffiths, L.J., Dezateux, C., Law, C., 2007. The impact of maternal employment on breast-feeding duration in the UK Millennium Cohort Study. *Public Health Nutrition* 10:891-96.

Hawkins, S.S., Griffiths, L.J., Dezateux, C., Law, C., Millennium Cohort Study Child Health, G., 2007. Maternal employment and breast-feeding initiation: findings from the Millennium Cohort Study. *Paediatric and Perinatal Epidemiology* 21:242-7.

Hawkins, S.S., Lamb, K., Cole, T.J., Law, C., 2008. Influence of Moving to the UK on Maternal Health Behaviours: Prospective Cohort Study. *BMJ (British Medical Journal)* 336:1052-55.

Health, R.C.o.P.a.C., 2017. State of child health 2 - Conception, pregnancy and infancy indicators, London.

Health, R.C.o.P.a.C., 2020. Latest figures on Scottish inequalities published.

Heikura, U., Hartikainen, A.L., Nordstrom, T., Pouta, A., Taanila, A., Jarvelin, M.R., 2013. Maternal hypertensive disorders during pregnancy and mild cognitive limitations in the offspring. *Paediatric and Perinatal Epidemiology* 27:188-98.

Hein, A., Rauh, C., Engel, A., Häberle, L., Dammer, U., Voigt, F., Fasching, P.A., Faschingbauer, F., Burger, P., et al., 2014. Socioeconomic status and depression during and after pregnancy in the Franconian Maternal Health Evaluation Studies (FRAMES). *Archives of Gynecology & Obstetrics* 289:755-63.

Henderson, J., Redshaw, M., 2011. Midwifery factors associated with successful breastfeeding. *Child Care, Health and Development* 37:744.

Herich, L.C., Cuttini, M., Croci, I., Franco, F., Di Lallo, D., Baronciani, D., Fares, K., Gargano, G., Raponi, M., et al., 2017. Maternal Education Is Associated with Disparities in Breastfeeding at Time of Discharge but Not at Initiation of Enteral Feeding in the Neonatal Intensive Care Unit. *Journal of Pediatrics* 182:59-65.e7.

Hoffman, S., Hatch, M.C., 2000. Depressive symptomatology during pregnancy: evidence for an association with decreased fetal growth in pregnancies of lower social class women. *Health Psychology* 19:535-43.

Holowko, N., Chaparro, M.P., Nilsson, K., Ivarsson, A., Mishra, G., Koupil, I., Goodman, A., 2015. Social inequality in pre-pregnancy BMI and gestational weight gain in the first and second pregnancy among women in Sweden. *Journal of Epidemiology & Community Health* 69:1154-61.

Holowko, N., Mishra, G., Koupil, I., 2014. Social inequality in excessive gestational weight gain. *International Journal of Obesity* 38:91-96.

Horowitz, J.A., Damato, E.G., Duffy, M.E., Solon, L., 2005. The relationship of maternal attributes, resources, and perceptions of postpartum experiences to depression. *Research in Nursing & Health* 28:159-71.

Howell, E.A., Mora, P., Leventhal, H., 2006. Correlates of early postpartum depressive symptoms. *Maternal & Child Health Journal* 10:149-57.

Hrolfsdottir, L., Schalkwijk, C.G., Birgisdottir, B.E., Gunnarsdottir, I., Maslova, E., Granstrom, C., Strom, M., Olsen, S.F., Halldorsson, T.J., 2016. Maternal diet, gestational weight gain, and inflammatory markers during pregnancy. *Obesity* 24:2133-39.

Hunker, D.F., 2007. Effects of adverse birth events on maternal mood, maternal functional status and infant care. University of Pittsburgh, Pittsburgh, pp. 105 p-05 p.

Ibanez, G., Blondel, B., Prunet, C., Kaminski, M., Saurel-Cubizolles, M.J., 2015. Prevalence and characteristics of women reporting poor mental health during pregnancy: Findings from the 2010 French national perinatal survey. *Revue d'Epidemiologie et de Sante Publique* 63:85-95.

Iglesias Casas, S., 2008. Sociocultural and healthcare factors influencing the choice and duration of breast feeding in a regional hospital. [Spanish]. *Enfermeria Clinica* 18:142-46.

Iglesias Casás, S., 2008. Sociocultural and healthcare factors influencing the choice and duration of breast feeding in a regional hospital. *Enfermeria Clinica* 18:142-46.

Isaia, M., Theodorou, M., Galanis, P., Nikolentzos, A., Polyzos, N., 2017. Breastfeeding determinants in Cyprus: A cross-sectional study. *Journal of Neonatal Nursing* 23:267-74.

Iznaola, C.M.A., Comeche, L.D., Mateo, C.M.H., Fernandez, C.P., Arias, M.H., Esteban, A.V., De las Heras Ibarra, S., 2017. Neonatal emergency attendance in a suburban area of Madrid. [Spanish]. *Acta Pediatrica Espanola* 75:e109-e12.

Jairaj, C., Fitzsimons, C.M., McAuliffe, F.M., O'Leary, N., Joyce, N., McCarthy, A., Cassidy, E., Donnelly, J., Tully, E., et al., 2019. A population survey of prevalence rates of antenatal depression in the Irish obstetric services using the Edinburgh Postnatal Depression Scale (EPDS). *Archives of Women's Mental Health* 22:349-55.

Jensen, I.P., Thorsen, P., Jeune, B., Moller, B.R., Vestergaard, B.F., 2000. An epidemic of parvovirus B19 in a population of 3596 pregnant women: A study of sociodemographic and medical risk factors. *British Journal of Obstetrics and Gynaecology* 107:637-43.

Jones, S., Tyler, E., Brassey, J., De Souza, S., Reilly, R., Paranjthy, S., 2012. Smoking in pregnancy: briefing paper reproductive and early years pathfinder project. *Placenta* 11:6.

Kaharuza, F.M., Sabroe, S., Basso, O., 2001. Choice and chance: Determinants of short interpregnancy intervals in Denmark. *Acta Obstetrica et Gynecologica Scandinavica* 80:532-38.

Kana, M.A., Peleteiro, B., Correia, S., Barros, H., 2019. Trends in sociodemographic and health care factors in Portuguese and non-Portuguese mothers giving birth in Portugal, 1995-2014. *Paediatric and Perinatal Epidemiology* 33:249-59.

Kantor, E., Guglielminotti, J., Azria, E., Luton, D., Laurent, M., Oury, J.F., Mahieu-Caputo, D., Ravaut, P., Estellat, C., 2017a. Socioeconomic Deprivation and Utilization of Anesthetic Care during Pregnancy and Delivery: A French Retrospective, Multicenter, Cohort Study. *Anesthesia and Analgesia* 125:925-33.

Kantor, E., Guglielminotti, J., Azria, E., Luton, D., Laurent, M., Oury, J.F., Mahieu-Caputo, D., Ravaut, P., Estellat, C., et al., 2017b. Socioeconomic Deprivation and Utilization of Anesthetic Care During Pregnancy and Delivery: A Secondary Analysis of a French Prospective, Multicenter, Cohort Study. *Anesthesia & Analgesia* 125:925-33.

Kapaya, H., Mercer, E., Boffey, F., Jones, G., Mitchell, C., Anumba, D., 2015. Deprivation and poor psychosocial support are key determinants of late antenatal presentation and poor fetal outcomes-a combined retrospective and prospective study. *BMC Pregnancy and Childbirth* 15:9.

Katon, W., Russo, J., Gavin, A., 2014. Predictors of Postpartum Depression. *Journal of Women's Health* 23:753-59.

Kaya, L., Cigdem, Z., 2019. The relationship between mode of delivery and postpartum depression. *Journal of Education and Health Promotion* 8.

Kazmierczak, M., Gebuza, G., Banaszkiewicz, M., Mieczkowska, E., Gierszewska, M., 2017. Mood disorders after childbirth. *Polish Annals of Medicine* 24:111-16.

Kek, T., Kuzelicki, N.K., Rascan, I.M., Gersak, K., 2017. Characteristics of health behaviours and health status indicators among pregnant women in Slovenia. *Zdravniški Vestnik* 86:295-317.

Keller, N., Medved, V., Armano, G., 2016. The Influence of Maternal Personality and Risk Factors for Impaired Mother-Infant Bonding on Breastfeeding Duration. *Breastfeeding Medicine: The Official Journal of the Academy of Breastfeeding Medicine* 11:532-37.

Kelly, Y.J., Watt, R.G., 2005. Breast-feeding initiation and exclusive duration at 6 months by social class--results from the Millennium Cohort Study. *Public Health Nutrition* 8:417-21.

Kersuzan, C., Gojard, S., Tichit, C., Thierry, X., Wagner, S., Nicklaus, S., Geay, B., Charles, M.A., Lioret, S., et al., 2014. Breastfeeding prevalence in maternity wards according to parents and delivery characteristics. Results from the EL FE Survey in maternity units, mainland France, 2011. *Bulletin Epidemiologique Hebdomadaire*:440-49.

Kiernan, K., Pickett, K.E., 2006. Marital Status Disparities in Maternal Smoking during Pregnancy, Breastfeeding and Maternal Depression. *Social Science & Medicine* 63:335-46.

Kihal-Talantikite, W., Padilla, C.M., Lalloué, B., Gelormini, M., Zmirou-Navier, D., Deguen, S., 2013. Green space, social inequalities and neonatal mortality in France. *BMC Pregnancy and Childbirth* 13:191.

Kingsbury, A.M., Plotnikova, M., Clavarino, A., Mamun, A., Najman, J.M., 2018. Social adversity in pregnancy and trajectories of women's depressive symptoms: A longitudinal study. *Women & Birth* 31:52-58.

Kingston, D., Sword, W., Krueger, P., Hanna, S., Markle?Reid, M., 2012. Life course pathways to prenatal maternal stress. *Journal of Obstetric, Gynecologic, and Neonatal Nursing* 41:609-26.

Kinser, P.A., Thacker, L.R., Lapato, D., Wagner, S., Roberson-Nay, R., Jobe-Shields, L., Amstadter, A., York, T.P., 2018. Depressive Symptom Prevalence and Predictors in the First Half of Pregnancy. *Journal of Women's Health* (15409996) 27:369-76.

Kirkegaard-Klitbo, D.M., Perslev, K., Andersen, S.L., Perrild, H., Knudsen, N., Weber, T., Rasmussen, L.B., Laurberg, P., 2016. Iodine deficiency in pregnancy is prevalent in vulnerable groups in Denmark. *Danish Medical Journal* 63 (11) (no pagination).

Knowles, S.J., Grundy, K., Cahill, I., Cafferkey, M.T., Geary, M., 2005. Low cytomegalovirus sero-prevalence in Irish pregnant women. *Irish Medical Journal* 98:210-12.

Kohlhuber, M., Rebhan, B., Schwegler, U., Koletzko, B., Fromme, H., 2008. Breastfeeding rates and duration in Germany: A Bavarian cohort study. *British Journal of Nutrition* 99:1127-32.

Kools, E.J., Thijs, C., de Vries, H., 2005. The behavioral determinants of breast-feeding in the Netherlands: predictors for the initiation of breast-feeding. *Health Education & Behavior* 32:809-24.

Koutra, K., Vassilaki, M., Georgiou, V., Koutis, A., Bitsios, P., Kogevinas, M., Chatzi, L., 2018. Pregnancy, perinatal and postpartum complications as determinants of postpartum depression: The Rhea mother-child cohort in Crete, Greece. *Epidemiology and Psychiatric Sciences* 27:244-55.

Kozinszky, Z., Dudas, R.B., Csatornai, S., Devosa, I., Tóth, E., Szabó, D., Sikovanyecz, J., Zádori, J., Barabás, K., et al., 2011. Social dynamics of postpartum depression: a population-based screening in South-Eastern Hungary. *Social Psychiatry & Psychiatric Epidemiology* 46:413-23.

Kritsotakis, G., Vassilaki, M., Melaki, V., Georgiou, V., Philalithis, A.E., Bitsios, P., Kogevinas, M., Chatzi, L., Koutis, A., 2013. Social capital in pregnancy and postpartum depressive symptoms: A prospective mother-child cohort study (the Rhea study). *International Journal of Nursing Studies* 50:63.

Kronborg, H., Væth, M., 2004. The influence of psychosocial factors on the duration of breastfeeding. *Scandinavian Journal of Public Health* 32:210-16.

Kuntz, B., Lampert, T., 2016. Social Disparities in Maternal Smoking during Pregnancy. *Geburtshilfe und Frauenheilkunde* 76:239-47.

Lannero, E., Kull, I., Wickman, M., Pershagen, G., Nordvall, S.L., 2002. Environmental risk factors for allergy and socioeconomic status in a birth cohort (BAMSE). *Pediatric Allergy and Immunology* 13:182-87.

Lanting, C.I., Van Wouwe, J.P., Reijneveld, S.A., 2005. Infant milk feeding practices in the Netherlands and associated factors. *Acta Paediatrica* 94:935-42.

Lasek, D.G., 1999. Mother-daughter attachment, social support, relationship with husband, and socioeconomic status as predictors of postpartum depression. Indiana State University, Indiana, pp. 101 p-01 p.

Lau, Y., Htun, T.P., Kwong, H.K.D., 2018. Sociodemographic, obstetric characteristics, antenatal morbidities, and perinatal depressive symptoms: A three-wave prospective study. *PLoS One* 13 (2) (no pagination).

Lauria, L., Lamberti, A., Grandolfo, M., 2012. Smoking behaviour before, during, and after pregnancy: The effect of breastfeeding. *The Scientific World Journal* 2012 (no pagination).

Lawlor, D.A., Morton, S., Batty, G.D., Macintyre, S., Clark, H., Smith, G.D., 2007. Obstetrician-assessed maternal health at pregnancy predicts offspring future health. *PLoS One* 2:e666.

Leach, L.S., Poyser, C., Fairweather-Schmidt, K., 2017. Maternal perinatal anxiety: A review of prevalence and correlates. *Clinical Psychologist* 21:Apr-19.

Lehti, V., Sourander, A., Polo-Kantola, P., Sillanmaki, L., Tamminen, T., Kumpulainen, K., 2013. Association between childhood psychosocial factors and induced abortion. *European Journal of Obstetrics, Gynecology, & Reproductive Biology* 166:190-5.

Lessen, R., Crivelli-Kovach, A., 2007. Prediction of initiation and duration of breast-feeding for neonates admitted to the neonatal intensive care unit. *Journal of Perinatal & Neonatal Nursing* 21:256-66.

Lewkowitz, A.K., Raghuraman, N., López, J.D., Macones, G.A. and Cahill, A.G., 2019. Infant Feeding Practices and Perceived Optimal Breastfeeding Interventions among Low-Income Women Delivering at a Baby-Friendly Hospital. *American Journal of Perinatology* 36:669-77.

Li, Y., Quigley, M.A., Dattani, N., Gray, R., Jayaweera, H., Kurinczuk, J.J., Macfarlane, A., Hollowell, J., 2018. The contribution of gestational age, area deprivation and mother's country of birth to ethnic variations in infant mortality in England and Wales: A national cohort study using routinely collected data. *PLoS One* 13 (4) (no pagination).

Lindgren, K., 2001. Relationships among maternal-fetal attachment, prenatal depression, and health practices in pregnancy. *Research in Nursing & Health* 24:203-17.

Lindstad Lovasmoen, E.M., Nyland Bjorgo, M., Lukasse, M., Schei, B., Henriksen, L., 2018. Women's preference for caesarean section and the actual mode of delivery - Comparing five sites in Norway. *Sexual and Reproductive Healthcare* 16:206-12.

Logan, C., Zittel, T., Striebel, S., Reister, F., Brenner, H., Rothenbacher, D., Genuneit, J., 2016. Changing Societal and Lifestyle Factors and Breastfeeding Patterns Over Time. *Pediatrics* 137:01-Oct.

Loomans, E.M., van Dijk, A.E., Vrijotte, T.G., van Eijdsen, M., Stronks, K., Gemke, R.J., Van den Bergh, B.R., 2013. Psychosocial stress during pregnancy is related to adverse birth outcomes: results from a large multi-ethnic community-based birth cohort. *European Journal of Public Health* 23:485-91.

MacFarlane, A., Mugford, M., 2000. Birth Counts: statistics on pregnancy and childbirth. the Stationary Office. London.

Madden, D., 2014. The relationship between low birth weight and socioeconomic status in Ireland. *Journal of Biosocial Science* 46:248-65.

Makara-Studzinska, M., Morylowska-Topolska, J., Sygit, K., Sygit, M., Gozdziwska, M., 2013. Socio-demographical and psychosocial determinants of anxiety symptoms in a population of pregnant women in the regions of central and eastern Poland. *Annals of Agricultural and Environmental Medicine* 20:195-202.

Manganaro, R., Marseglia, L., Mami, C., Paolata, A., Gargano, R., Mondello, M., Puliafito, A., Gemelli, M., 2009. Effects of hospital policies and practices on initiation and duration of breastfeeding. *Child: Care, Health & Development* 35:106-11.

Manios, Y., Grammatikaki, E., Kondaki, K., Ioannou, E., Anastasiadou, A., Biribilis, M., 2009. The effect of maternal obesity on initiation and duration of breast-feeding in Greece: the GENESIS study. *Public Health Nutrition* 12:517-24.

Marcus, S.M., Flynn, H.A., Blow, F.C., Barry, K.L., 2003. Depressive symptoms among pregnant women screened in obstetrics settings. *Journal of Women's Health* (15409996) 12:373-80.

Marin-Morales, D., Monge, F.J., Penacoba-Puente, C., 2014. Personality, depressive symptoms during pregnancy and their influence on postnatal depression in Spanish pregnant Spanish women. *Anales de Psicología* 30:908-15.

Martini, J., Petzoldt, J., Einsle, F., Beesdo-Baum, K., Höfler, M., Wittchen, H.-U., 2015. Risk factors and course patterns of anxiety and depressive disorders during pregnancy and after delivery: A prospective-longitudinal study. *Journal of Affective Disorders* 175:385-95.

Matteo, B., Miriam, I., Giulia, B., Salvatore, C., Anita, C., Lorenza, D., Diego, M., Paola, P., Michela, R., et al., 2012. Determinants of ante-partum depression: a multicenter study. *Social Psychiatry & Psychiatric Epidemiology* 47:1959-65.

McCall-Hosenfeld, J.S., Phiri, K., Schaefer, E., Zhu, J., Kjerulff, K., 2016. Trajectories of Depressive Symptoms Throughout the Peri- and Postpartum Period: Results from the First Baby Study. *Journal of Women's Health* (15409996) 25:1112-21.

McEachan, R.R.C., Prady, S.L., Smith, G., Fairley, L., Cabieses, B., Gidlow, C., Wright, J., Dadvand, P., van Gent, D., et al., 2016. The association between green space and depressive symptoms in pregnant women: moderating roles of socioeconomic status and physical activity. *Journal of Epidemiology & Community Health* 70:253-59.

McMillan, B., Conner, M., Woolridge, M., Dyson, L., Green, J., Renfrew, M., Bharj, K., Clarke, G., 2008. Predicting breastfeeding in women living in areas of economic hardship: explanatory role of the theory of planned behaviour. *Psychology & Health* 23:767-88.

McMillan, B., Green, J.M., Woolridge, M.W., Dyson, L., Renfrew, M.J., Clarke, G.P., 2009. Studying the infant feeding intentions of pregnant women experiencing material deprivation: methodology of the Looking at Infant Feeding Today (LIFT) study. *Social Science & Medicine* 68:845-49.

Melchior, M., Chastang, J.-F., de Lauzon, B., Galera, C., Saurel-Cubizolles, M.-J., Larroque, B., 2012. Maternal depression, socioeconomic position, and temperament in early childhood: The EDEN mother-child cohort. *Journal of Affective Disorders* 137:165-69.

Melchior, M., Chollet, A., Glangeaud-Freudenthal, N., Saurel-Cubizolles, M.J., Dufourg, M.N., van der Waerden, J., Sutter-Dallay, A.L., 2015. Tobacco and alcohol use in pregnancy in France: The role of migrant status. The nationally representative ELFE study. *Addictive Behaviors* 51:65-71.

Melve, K.K., Skjaerven, R., 2003. Birthweight and perinatal mortality: Paradoxes, social class, and sibling dependencies. *International Journal of Epidemiology* 32:625-32.

Mikiel-Kostyra, K., Mazur, J., Wojdan-Godek, E., 2005. Factors affecting exclusive breastfeeding in Poland: cross-sectional survey of population-based samples. *Sozial- und Präventivmedizin* 50:52-9.

Mirabella, F., Michielin, P., Piacentini, D., Veltro, F., Barbano, G., Cattaneo, M., Cascavilla, I., Palumbo, G., Gigantesco, A., 2014. [Positive screening and risk factors of postpartum depression in women who attended antenatal course]. *Rivista di Psichiatria* 49:253-64.

Molyneaux, E., Pasupathy, D., Kenny, L.C., McCowan, L.M.E., North, R.A., Dekker, G.A., Walker, J.J., Baker, P.N., Poston, L., et al., 2016. Socio-economic status influences the relationship between obesity and antenatal depression: Data from a prospective cohort study. *Journal of Affective Disorders* 202:124-27.

Morgen, C.S., Andersen, P.K., Mortensen, L.H., Howe, L.D., Rasmussen, M., Due, P., Sorensen, T.I.A., Andersen, A.M.N., 2017. Socioeconomic disparities in birth weight and body mass index during infancy through age 7 years: A study within the Danish National Birth Cohort. *BMJ Open* 7 (1) (no pagination).

Morr, A.K., Broscheit, J., Blissung, S., Bernar, T., Dietl, J., 2007. Influence of socio-economic status on the utilization of epidural analgesia during labor. [German]. *Zeitschrift für Geburtshilfe und Neonatologie* 211:23-26.

Morylowska-Topolska, J., Makara-Studzinska, M., Kotarski, J., 2014. The influence of sociodemographic and medical variables on severity of anxiety and depressive symptoms during particular trimesters of pregnancy. *Psychiatria Polska* 48:173-86.

Nager, A., Johansson, L.M., Sundquist, K., 2005. Are sociodemographic factors and year of delivery associated with hospital admission for postpartum psychosis? A study of 500 000 first-time mothers. *Acta Psychiatrica Scandinavica* 112:47-53.

Nagy, E., Molnar, P., Pal, A., Orvos, H., 2011. Prevalence rates and socioeconomic characteristics of post-partum depression in Hungary. *Psychiatry Research* 185:113-20.

Nicotra, F., Molinari, C., Dozio, N., Castiglioni, M.T., Ibrahim, B., Zamboni, A., Corrao, G., Scavini, M., 2015. Screening for gestational diabetes in the Lombardy region: A population-based study. *Diabetes and Metabolism* 41:319-25.

Niela-Vilén, H., Melender, H.-L., Axelin, A., Löytyniemi, E., Salanterä, S., 2016. Predictors of breastfeeding initiation and frequency for preterm infants in the NICU. *MIDIRS Midwifery Digest* 26:361-71.

Northrup, T.F., Evans, P.W., Stotts, A.L., 2013. Depression Among Mothers of High-Risk Infants Discharged From a Neonatal Intensive Care Unit. *MCN: American Journal of Maternal & Child Nursing* 38:89.

Northrup, T.F., Evans, P.W., Stotts, A.L., 2013. Depression Among Mothers. *MCN: The American Journal of Maternal Child Nursing* 38:89-94.

Noy, A., Taubman – Ben-Ari, O., Kuint, J., 2015. Well-Being and Personal Growth in Mothers of Full-Term and Pre-Term Singletons and Twins. *Stress & Health: Journal of the International Society for the Investigation of Stress* 31:365-72.

O'Malley, E.G., Walsh, M.C., Reynolds, C.M.E., Kennelly, M., Sheehan, S.R., Turner, M.J., 2019. A cross-sectional study of maternal-fetal attachment and perceived stress at the first antenatal visit. *Journal of Reproductive and Infant Psychology*.

Oakley, L.L., Henderson, J., Redshaw, M., Quigley, M.A., 2014. The role of support and other factors in early breastfeeding cessation: an analysis of data from a maternity survey in England. *BMC Pregnancy and Childbirth* 14:12.

Odland, J.O., Nieboer, E., Romanova, N., Thomassen, Y., 2004. Elements in placenta and pregnancy outcome in arctic and subarctic areas. *International Journal of Circumpolar Health* 63:169-87.

Oliveira, M., 2016. Aleitamento Materno: Estudo de Prevalência e Fatores Condicionantes nos Primeiros Seis Meses de Vida. *Pensar Enfermagem* 20:Apr-15.

Oliver, A., Torras, N., Martinez, L., 2003. Factors influencing duration of breast feeding in the Hospital de Sant Pau in Barcelona (Spain). *Enfermeria Clínica* 13:329-36.

Orr, S.T., Blazer, D.G., James, S.A., Reiter, J.P., 2007. Depressive symptoms and indicators of maternal health status during pregnancy. *Journal of Women's Health* (15409996) 16:535-42.

Papamarkou, M., Sarafis, P., Kaite, C.P., Malliarou, M., Tsounis, A., Niakas, D., 2017. Investigation of the association between quality of life and depressive symptoms during postpartum period: A correlational study. *BMC Women's Health* 17 (1) (no pagination).

Patel, A.L., Schoeny, M.E., Hoban, R., Johnson, T.J., Bigger, H., Engstrom, J.L., Fleurant, E., Riley, B., Meier, P.P., 2019. Mediators of racial and ethnic disparity in mother's own milk feeding in very low birth weight infants. *Pediatric Research* 85:662-70.

Pawlowski, B., Uliaszek, S.J., 2011. Waist-to-hip ratio and woman's education level as predictors of breastfeeding duration. *Collegium Antropologicum* 35:313-8.

Pechlivani, F., Vassilakou, T., Sarafidou, J., Zachou, T., Anastasiou, C.A., Sidossis, L.S., 2005. Prevalence and determinants of exclusive breastfeeding during hospital stay in the area of Athens, Greece. *Acta Paediatrica, International Journal of Paediatrics* 94:928-34.

Pedersen, W., Samuelsen, S.O., Eskild, A., 2006. [Abortion among young women--the importance of family environment factors and social class]. *Tidsskrift for Den Norske Lægeforening* 126:1734-7.

Peñuelas Carcavilla, M.C., Enjuto Gutiérrez, B., Cruz Argudo, J., Peñuelas Carcavilla, R., 2008. Prevalence of maternal breastfeeding in primary care and influence of social, sanitary and cultural factors. *Metas de Enfermería* 11:14-17.

Peregrino, A.B., Watt, R.G., Heilmann, A., Jivraj, S., 2018. Breastfeeding practices in the United Kingdom: Is the neighbourhood context important? *Maternal & Child Nutrition* 14:01-Jan.

Perng, W., Stuart, J., Rifas-Shiman, S.L., Rich-Edwards, J.W., Stuebe, A., Oken, E., 2015. Preterm birth and long-term maternal cardiovascular health. *Annals of Epidemiology* 25:40-45.

Pertile, R., Pavanello, L., Soffiati, M., Manica, L., Piffer, S., 2018. Length of stay for childbirth in Trentino (North-East of Italy): the impact of maternal characteristics and organizational features of the maternity unit on the probability of early discharge of healthy, term infants. *European Journal of Pediatrics* 177:155-59.

Petersen, I., Peltola, T., Kaski, S., Walters, K.R., Hardoon, S., 2018. Depression, depressive symptoms and treatments in women who have recently given birth: UK cohort study. *BMJ Open* 8 (10) (no pagination).

Pintassilgo, S., Carvalho, H., 2017. Trends and consequences of the technocratic paradigm of childbirth in Portugal: A population-based analysis of birth conditions and social characteristics of parents. *Sexual and Reproductive Healthcare* 13:58-67.

Pizzi, C., Cole, T.J., Richiardi, L., Dos-Santos-Silva, I., Corvalan, C., De Stavola, B., 2014. Prenatal influences on size, velocity and tempo of infant growth: Findings from three contemporary cohorts. *PLoS One* 9 (2) (no pagination).

Plans, P., Alvarez, E., De Ory, F., Campins, M., Paya, T., Balfagon, P., Godoy, P., Cayla, J., Carreras, R., et al., 2014. Prevalence of antibody to bordetella pertussis in neonates and prevalence of recent pertussis infection in pregnant women in Catalonia (Spain) in 2003 and 2013. *Pediatric Infectious Disease Journal* 33:1114-18.

Prady, S.L., Pickett, K.E., Croudace, T., Fairley, L., Bloor, K., Gilbody, S., Kiernan, K.E., Wright, J., 2013. Psychological Distress during Pregnancy in a Multi-Ethnic Community: Findings from the Born in Bradford Cohort Study. *PLoS One* 8 (4) (no pagination).

Raikkonen, K., O'Reilly, J.R., Pesonen, A.K., Kajantie, E., Villa, P., Laivuori, H., Hamalainen, E., Seckl, J.R., Reynolds, R.M., 2014. Associations between maternal level of education and occupational status with placental glucocorticoid regeneration and sensitivity. *Clinical Endocrinology* 81:175-82.

Raleigh, V., Hussey, D., Seccombe, I., Hall, K., 2010. Ethnic and social inequalities in women's experience of maternity care in England: results of a national survey. *Journal of the Royal Society of Medicine* 103:188-98.

Ratcliff, B.G., Sharapova, A., Suardi, F., Borel, F., 2015. Factors associated with antenatal depression and obstetric complications in immigrant women in Geneva. *Midwifery* 31:871-78.

RCM, 2012. Evidence Based Guidelines for Midwifery-Led Care in Labour. Royal College of Midwives, London.

RCM, 2017. Stepping up to Public Health: A new maternity model for women and families, midwives and maternity support workers. Royal College of Midwives, London.

RCOa, G., 2014. Healthy eating and vitamin supplements in pregnancy. Online: Royal College of Obstetrics and Gynaecology.

Reading, R., Reynolds, S., 2001. Debt, social disadvantage and maternal depression. *Social Science and Medicine* 53:441-53.

Redshaw, M., Henderson, J., 2013. From Antenatal to Postnatal Depression: Associated Factors and Mitigating Influences. *Journal of Women's Health* (15409996) 22:518-25.

Reid, M., Scott, J.A., Shaker, I., 2004. Parental attitudes toward breastfeeding: their association with feeding outcome at hospital discharge. *Birth: Issues in Perinatal Care* 31:125-31.

Reilly, R., Paranjthy, S., Fone, D.L., 2014. Adolescent pregnancy in the United Kingdom. Cherry, Andrew L [Ed]// Dillon, Mary E [Ed] (2014) International handbook of adolescent pregnancy: Medical, psychosocial, and public health responses (pp 643-659) xiv, 712 pp New York, NY, US: Springer Science + Business Media// US:643-59.

Rendall, M., Aracil, E., Bagavos, C., Couet, C., DeRose, A., DiGiulio, P., Lappegard, T., Robert-Bobee, I., Ronsen, M., et al., 2010. Increasingly heterogeneous ages at first birth by education in Southern European and Anglo-American family-policy regimes: A seven-country comparison by birth cohort. *Population Studies* 64:209-27.

Reverte Simó, M., Aguirre Fernández, M.I., Alvarez Diez, P., Barcos San Andrés, S., Millán Capaces, T., 2015. Breastfeeding. Factors associated with initiation, exclusivity and duration. *Metas de Enfermería* 18:69-75.

Reynolds, C.M.E., Egan, B., McMahon, L., O'Malley, E.G., Sheehan, S.R., Turner, M.J., 2019. Maternal obesity trends in a large Irish university hospital. *European Journal of Obstetrics and Gynecology and Reproductive Biology* 238:95-99.

Rezeberga, D., Lazdane, G., Donders, G.G.G., 2007. The impact of social factors on attendance at antenatal care services and the subsequent effect on mothers' health, measured during the years of economic transition in Latvia. *European Clinics in Obstetrics and Gynaecology* 3:47-51.

Romero-Gutierrez, G., Duenas-de la Rosa, E.M., Regalado-Cedillo, C.A., Ponce-Ponce de Leon, A.L., 2010. [Prevalence of maternal sadness and its associated factors]. *Ginecología y Obstetricia de Mexico* 78:53-7.

Romero Hernández, M.E., Algaba Piña, S., Albar Marín, M.J., Núñez Ollero, E., Calero Barbe, C., Pérez Cabellero, I.M., 2003. Prevalence of breastfeeding and hospital practices in maternity wards in the city of Sevilla. *Metas de Enfermería* 6:18-23.

Romero, M.E., Algaba, S., Albar, M.J., Núñez, E., Calero, C., Pérez, I.M., 2004. Influence of hospital practices on duration of breastfeeding. *Enfermería Clínica* 14:194-202.

Rouhani, P., Fleming, L.E., Frías, J., Martínez-Frías, M.L., Bermejo, E., Mendiore, J., 2007. Pilot study of socioeconomic class, nutrition and birth defects in Spain. *Maternal & Child Health Journal* 11:403-05.

Rowan, S., 2003. Implications of changes in the United Kingdom social and occupational classifications in 2001 on infant mortality statistics, *Health Statistics Quarterly*. Office of National Statistics, pp. 33-40.

Roza, S.J.M.D., Lier, P.A.C.v.P.H.D., Jaddoe, V.W.V.M.D., Steegers, E.A.P.M.D., Moll, H.A.M.D., Mackenbach, J.P.M.D., Hofman, A.M.D., Verhulst, F.C.M.D., Tiemeier, H.M.D., 2008. Intrauterine Growth and Infant Temperamental Difficulties: The Generation R Study. *Journal of the American Academy of Child and Adolescent Psychiatry* 47:264.

Rubertsson, C., Waldenstrom, U., Wickberg, B., 2003. Depressive mood in early pregnancy: Prevalence and women at risk in a national Swedish sample. *Journal of Reproductive and Infant Psychology* 21:113-23.

Rubertsson, C., Waldenström, U., Wickberg, B., Rådestad, I., Hildingsson, I., 2005a. Depressive mood in early pregnancy and postpartum: prevalence and women at risk in a national Swedish sample. *Journal of Reproductive and Infant Psychology* 23:155-66.

Rubertsson, C., Wickberg, B., Gustavsson, P., Rådestad, I., 2005b. Depressive symptoms in early pregnancy, two months and one year postpartum-prevalence and psychosocial risk factors in a national Swedish sample. *Archives of Women's Mental Health* 8:97-104.

Ruffin, S.D., Renaud, M., 2015. Prenatal education, significant other support and demographic determinants of breastfeeding within a rural community. *Online Journal of Rural Nursing and Health Care* 15:132-51.

Ruiz-Ramos, M., Ibanez-Gimeno, L., Garcia Leon, F.J., 2012. Sociodemographic characteristics of induced abortions in Andalusia (Spain): Differences between native and foreign populations. [Spanish]. *Gaceta Sanitaria* 26:504-11.

Sahrakorpi, N., Koivusalo, S., Eriksson, J., Kautiainen, H., Stach-Lempinen, B., Roine, R., 2017. Perceived Financial Satisfaction, Health Related Quality of Life and depressive Symptoms in Early Pregnancy. *Maternal & Child Health Journal* 21:1493-99.

Sahrakorpi, N., Koivusalo, S.B., Stach-Lempinen, B., Eriksson, J.G., Kautiainen, H., Roine, R.P., 2017. The burden of pregnancy// heavier for the heaviest? The changes in health related quality of life (HRQoL) assessed by the 15D instrument during pregnancy and postpartum in different body mass index groups: A longitudinal survey. *Acta Obstetrica et Gynecologica Scandinavica* 96:352-58.

Salehi, L., Tavafian, S., Salehi, F., 2009. Demographic features affecting on postpartum depression. *Journal of Nursing & Midwifery* 19:25-25.

Saligheh, M., Rooney, R.M., McNamara, B., Kane, R.T., 2014. The relationship between postnatal depression, sociodemographic factors, level of partner support, and levels of physical activity. *Frontiers in Psychology* 5.

Saurel-Cubizolles, M.J., Romito, P., Ancel, P.Y., Lelong, N., 2000. Unemployment and psychological distress one year after childbirth in France. *Journal of Epidemiology & Community Health* 54:185-91.

Schytt, E., Hildingsson, I., 2011. Physical and emotional self-rated health among Swedish women and men during pregnancy and the first year of parenthood. *Sexual & Reproductive Healthcare : official journal of the Swedish Association of Midwives* 2:57-64.

Segonds-Pichon, A., Daly, F.H., Morrison, J.J., Bury, G., Murphy, A.W., Kelleher, C.C., 2007. Socio-demographic, lifestyle and cross-generation predictors of self-rated health in mothers during pregnancy. *Irish Medical Journal* 100:suppl 7-12.

Seguin, L., Potvin, L., St-Denis, M., Loiselle, J., 1999. Socio-environmental factors and postnatal depressive symptomatology: a longitudinal study. *Women & Health* 29:57-71.

Selo-Ojeme, D.O., Omosaiye, M., Battacharjee, P., Kadir, R.A., 2005. Risk factors for obstetric admissions to the intensive care unit in a tertiary hospital: a case-control study. *Archives of Gynecology and Obstetrics* 272:207-10.

Sequi-Canet, J.M., Sala-Langa, M.J., Collar del Castillo, J.I., 2014. Perinatal factors affecting the detection of otoacoustic emissions in vaginally delivered, healthy newborns, during the first 48 hours of life. [Spanish]. *Acta Otorrinolaringologica Espanola* 65:01-Jul.

Sharan, H., Kaplan, B., Weizer, N., Sulkes, J., Merlob, P., 2006. Early screening of postpartum depression using the Edinburgh Postnatal Depression Scale. *International Journal of Risk and Safety in Medicine* 18:213-18.

Sheikh, M., Hantoushzadeh, S., Shariat, M., 2014. Maternal perception of decreased fetal movements from maternal and fetal perspectives, a cohort study. *BMC Pregnancy & Childbirth* 14:286.

Shepherd, C.K., Power, K.G., Carter, H., 2000. Examining the correspondence of breastfeeding and bottle-feeding couples' infant feeding attitudes. *Journal of Advanced Nursing* 31:651-60.

Shwartz, N., Shoahm-Vardi, I., Daoud, N., 2019. Postpartum depression among Arab and Jewish women in Israel: Ethnic inequalities and risk factors. *Midwifery* 70:54-63.

Sidor, A., Kohler, H., Cierpka, M., 2018. [Impact of Socioeconomic Risk Exposure on Maternal Sensitivity, Stress and Family Functionality]. *Praxis der Kinderpsychologie und Kinderpsychiatrie* 67:257-73.

Sihvo, S., Bajos, N., Ducot, B., Kaminski, M., 2003. Women's life cycle and abortion decision in unintended pregnancies. *Journal of Epidemiology & Community Health* 57:601-05.

Simpson, D.A., Quigley, M.A., Kurinczuk, J.J., Carson, C., 2019. Twenty-five-year trends in breastfeeding initiation: The effects of sociodemographic changes in Great Britain, 1985-2010. *PLoS One* 14 (1) (no pagination).

Skafta, V., 2009. The relative importance of social class and maternal education for breast-feeding initiation. *Public Health Nutrition* 12:2285-92.

Smith, H.A., Hourihane, J.O.B., Kenny, L.C., Kiely, M., Murray, D.M., Leahy-Warren, P., 2015. Early life factors associated with the exclusivity and duration of breast feeding in an Irish birth cohort study. *Midwifery* 31:904-11.

Soni, S., Gupta, A., Jacobs, A.J., 2011. Exclusive breastfeeding rates in a multiethnic population at a community hospital. *Journal of Reproductive Medicine for the Obstetrician and Gynecologist* 56:195-98.

Stepanikova, I., Kukla, L., 2017. Is Perceived Discrimination in Pregnancy Prospectively Linked to Postpartum Depression? Exploring the Role of Education. *Maternal & Child Health Journal* 21:1669-77.

Stokholm, J., Schjorring, S., Pedersen, L., Bischoff, A.L., Folsgaard, N., Carson, C.G., Chawes, B.L.K., Bonnelykke, K., Molgaard, A., et al., 2013. Prevalence and predictors of antibiotic administration during pregnancy and birth. *PLoS One* 8 (12) (no pagination).

Strandqvist, A., Falhammar, H., Lichtenstein, P., Hirschberg, A.L., Wedell, A., Norrby, C., Nordenskjöld, A., Frisen, L., Nordenstrom, A., 2014. Suboptimal psychosocial outcomes in patients with congenital adrenal hyperplasia: Epidemiological studies in a nonbiased national cohort in Sweden. *Journal of Clinical Endocrinology and Metabolism* 99:1425-32.

Suchomlinov, A., Tutkuvienė, J., 2016. FACTORS ASSOCIATED WITH CHILDREN'S HEIGHT AND BODY MASS INDEX IN LITHUANIA, 1990-2008. *Journal of Biosocial Science* 48:502-29.

Sumilo, D., Kurinczuk, J.J., Redshaw, M.E., Gray, R., 2012. Prevalence and impact of disability in women who had recently given birth in the UK. *BMC Pregnancy & Childbirth* 12:31-31.

Sylvén, S.M., Thomopoulos, T.P., Kollia, N., Jonsson, M., Skalkidou, A., 2017. Correlates of postpartum depression in first time mothers without previous psychiatric contact. *European Psychiatry* 40:04-Dec.

Szerafin, L., Jako, J., 2010. [Anemia in pregnancy: characteristics in Szabolcs-Szatmar-Bereg County, Hungary]. *Orvosi Hetilap* 151:1347-52.

Tammentie, T., Tarkka, M.T., Astedt-Kurki, P., Paavilainen, E., 2002. Sociodemographic factors of families related to postnatal depressive symptoms of mothers. *International Journal of Nursing Practice* 8:240-46.

Tanz, L.J., Stuart, J.J., Rich-Edwards, J.W., James-Todd, T.M., Williams, P.L., Rimm, E.B., Missmer, S.A., 2019. Preterm Delivery and Maternal Cardiovascular Disease Risk Factors: The Nurses' Health Study II. *Journal of Women's Health* (15409996) 28:677-85.

Tappin, D.M., Mackenzie, J.M., Brown, A.J., Girdwood, R.W.A., Britten, J., Broadfoot, M., Warren, J., 2001. Breastfeeding rates are increasing in Scotland. *Health Bulletin* 59:102-13.

Tata, L.J., 2012. Impact of sociodeprivation on maternal perinatal mental illnesses presenting to UK general practice. *British Journal of General Practice* 62:524-25.

|  |                                                                                                                                                                                                                                                                                                                                                                                                                                                                                                                                                                                                                                                                                                                                                                                                                                                                                                                                                                                                                                                                                                                                                                                                                                                                                                                                                                                                                                                                                                                                                                                                                                                                                                                                                                                                                                                                                                                                                                                                                                                                                                                                                                                                                                                                                                                                                                                                                                                                                                                                                                                                                                                                                                                                                                                                                                                                                                                                                                                                                                                                                                                                                                                                                                                                                                                                                                                                                                                                                                                                                                                                                                                                                                                                                                                                                                                                                                                                                                                                                                                                                                                                                                                                                                                                                                                                                                                                                                                                                                                                                                                                                                                                                                                                                                                                                                                                                                                                                                                                                                                                                                                                                                                                                                                                                                                                                                                                                                                                                                                                                                                                                                                                                                                                                                                                                                                                                                                                                                                                                                                                                                                                                                                                                                                                                                                                                                                                                                                                                                                                                                                                                                                                                                                                                                                                                                                                                                                                                                                                                                                                                                                                                                                                                                                                                                                                                                                                                                                                                                                                                                                                                                                                                                                                                                                                                                                                                                                                                                                                                                                                                                                                                                                                                                                                                                                                                                                                                                                                                                                                                                 |
|--|-----------------------------------------------------------------------------------------------------------------------------------------------------------------------------------------------------------------------------------------------------------------------------------------------------------------------------------------------------------------------------------------------------------------------------------------------------------------------------------------------------------------------------------------------------------------------------------------------------------------------------------------------------------------------------------------------------------------------------------------------------------------------------------------------------------------------------------------------------------------------------------------------------------------------------------------------------------------------------------------------------------------------------------------------------------------------------------------------------------------------------------------------------------------------------------------------------------------------------------------------------------------------------------------------------------------------------------------------------------------------------------------------------------------------------------------------------------------------------------------------------------------------------------------------------------------------------------------------------------------------------------------------------------------------------------------------------------------------------------------------------------------------------------------------------------------------------------------------------------------------------------------------------------------------------------------------------------------------------------------------------------------------------------------------------------------------------------------------------------------------------------------------------------------------------------------------------------------------------------------------------------------------------------------------------------------------------------------------------------------------------------------------------------------------------------------------------------------------------------------------------------------------------------------------------------------------------------------------------------------------------------------------------------------------------------------------------------------------------------------------------------------------------------------------------------------------------------------------------------------------------------------------------------------------------------------------------------------------------------------------------------------------------------------------------------------------------------------------------------------------------------------------------------------------------------------------------------------------------------------------------------------------------------------------------------------------------------------------------------------------------------------------------------------------------------------------------------------------------------------------------------------------------------------------------------------------------------------------------------------------------------------------------------------------------------------------------------------------------------------------------------------------------------------------------------------------------------------------------------------------------------------------------------------------------------------------------------------------------------------------------------------------------------------------------------------------------------------------------------------------------------------------------------------------------------------------------------------------------------------------------------------------------------------------------------------------------------------------------------------------------------------------------------------------------------------------------------------------------------------------------------------------------------------------------------------------------------------------------------------------------------------------------------------------------------------------------------------------------------------------------------------------------------------------------------------------------------------------------------------------------------------------------------------------------------------------------------------------------------------------------------------------------------------------------------------------------------------------------------------------------------------------------------------------------------------------------------------------------------------------------------------------------------------------------------------------------------------------------------------------------------------------------------------------------------------------------------------------------------------------------------------------------------------------------------------------------------------------------------------------------------------------------------------------------------------------------------------------------------------------------------------------------------------------------------------------------------------------------------------------------------------------------------------------------------------------------------------------------------------------------------------------------------------------------------------------------------------------------------------------------------------------------------------------------------------------------------------------------------------------------------------------------------------------------------------------------------------------------------------------------------------------------------------------------------------------------------------------------------------------------------------------------------------------------------------------------------------------------------------------------------------------------------------------------------------------------------------------------------------------------------------------------------------------------------------------------------------------------------------------------------------------------------------------------------------------------------------------------------------------------------------------------------------------------------------------------------------------------------------------------------------------------------------------------------------------------------------------------------------------------------------------------------------------------------------------------------------------------------------------------------------------------------------------------------------------------------------------------------------------------------------------------------------------------------------------------------------------------------------------------------------------------------------------------------------------------------------------------------------------------------------------------------------------------------------------------------------------------------------------------------------------------------------------------------------------------------------------------------------------------------------------------------------------------------------------------------------------------------------------------------------------------------------------------------------------------------------------------------------------------------------------------------------------------------------------------------------------------------------------------------------------------------------------------------------------------------------------------------------------------------------------------------------------------------------|
|  | <p>Tavoulari, E.-F., Benetou, V., Vlastarakos, P.V., Andriopoulou, E., Kreatsas, G., Linos, A., 2015. Factors affecting breast-feeding initiation in Greece: What is important? <i>Midwifery</i> 31:323-31.</p> <p>Tavoulari, E.F., Benetou, V., Vlastarakos, P.V., Kreatsas, G., Linos, A., 2015. Immigrant status as important determinant of breastfeeding practice in southern Europe. <i>Central European Journal of Public Health</i> 23:39-44.</p> <p>Thio, I.M., 2004. Resilience against stress and depression in the postpartum period. <i>Dissertation Abstracts International: Section B: The Sciences and Engineering</i> 65:454.</p> <p>Thulier, D., Mercer, J., 2009. Variables associated with breastfeeding duration. <i>JOGNN: Journal of Obstetric, Gynecologic &amp; Neonatal Nursing</i> 38:259-68.</p> <p>Tonei, V., 2019. Mother's mental health after childbirth: Does the delivery method matter? <i>Journal of Health Economics</i> 63:182-96.</p> <p>Turton, P., Evans, C., Hughes, P., 2009. Long-term psychosocial sequelae of stillbirth: phase II of a nested case-control cohort study. <i>Archives of Women's Mental Health</i> 12:35-41.</p> <p>Turton, P., Hughes, P., Bolton, H., Sedgwick, P., 1999. Incidence and demographic correlates of eating disorder symptoms in a pregnant population. <i>International Journal of Eating Disorders</i> 26:448-52.</p> <p>Tuschy, B., Berlit, S., Stutzer, P., Lis, S., Schmahl, C., Baumgartner, U., Sutterlin, M., 2018. Evaluation of psychosocial and biological parameters in women seeking for a caesarean section and women who are aiming for vaginal delivery: a cross-sectional study. <i>Archives of Gynecology and Obstetrics</i> 297:897-905.</p> <p>Uguz, F., Akman, C., Sahingoz, M., Kaya, N., Kucur, R., 2009. One year follow-up of post-partum-onset depression: The role of depressive symptom severity and personality disorders. <i>Journal of Psychosomatic Obstetrics and Gynecology</i> 30:141-45.</p> <p>Vaisanen, H., 2015. The association between education and induced abortion for three cohorts of adults in Finland. <i>Population Studies</i> 69:373-88.</p> <p>Väisänen, H., 2016. EDUCATIONAL INEQUALITIES IN REPEAT ABORTION: A LONGITUDINAL REGISTER STUDY IN FINLAND 1975-2010. <i>Journal of Biosocial Science</i> 48:820-32.</p> <p>Valdrez, K., Alves, E., Coelho, T., Silva, S., 2014. Prevalence of use of preimplantation genetic diagnosis in unidade clinica de paramiloidose from centro hospitalar do porto. <i>Acta Medica Portuguesa</i> 27:710-16.</p> <p>Valeur-Jensen, A.K., Pedersen, C.B., Westergaard, I.P., Jensen, I.P., Lebech, M., Andersen, P.K., Aaby, P., Pedersen, B.N., Melbye, M., et al., 1999. Risk factors for parvovirus B19 infection in pregnancy. <i>JAMA: Journal of the American Medical Association</i> 281:1099-105.</p> <p>van der Waerden, J., Galéra, C., Saurel-Cubizolles, M.J., Sutter-Dallay, A.L., Melchior, M., 2015. Predictors of persistent maternal depression trajectories in early childhood: results from the EDEN mother-child cohort study in France. <i>Psychological Medicine</i> 45:1999-2012.</p> <p>Van Kerschaver, E., 2013. Universal neonatal hearing screening in Flanders reveals socio-demographic risk factors for hearing impairment. <i>B-Ent:03-Aug.</i></p> <p>Van Kerschaver, E., Boudewyns, A.N., Declau, F., Van de Heyning, P.H., Wuyts, F.L., 2013. Socio-demographic determinants of hearing impairment studied in 103835 term babies. <i>European Journal of Public Health</i> 23:55-60.</p> <p>Van Winckel, M., Van De Keere, N., Deblaere, S., Van Put, V., Robberecht, E., 2000. Breastfeeding in Gent, Belgium. A cohort study on breastfeeding rate and duration. <i>Advances in Experimental Medicine &amp; Biology</i> 478:431-2.</p> <p>Vassilaki, M., Chatzi, L., Bagkeris, E., Papadopoulou, E., Karachaliou, M., Koutis, A., Philalithis, A., Kogevinas, M., 2014. Smoking and caesarean deliveries: Major negative predictors for breastfeeding in the mother-child cohort in Crete, Greece (Rhea study). <i>Maternal and Child Nutrition</i> 10:335-46.</p> <p>Vernon, M.M., Young-Hyman, D., Looney, S.W., 2010. Maternal stress, physical activity, and body mass index during new mothers' first year postpartum. <i>Women and Health</i> 50:544-62.</p> <p>Vessiere-Varigny, M., Garlantezec, R., Gremmo-Feger, G., Collet, M., Sizun, J., 2010. Breastfeeding in a population of preterm infants: A prospective study in a university-affiliated hospital. [French]. <i>Archives de Pédiatrie</i> 17:1416-24.</p> <p>Victora, C.G., De Onis, M., Garza, C., Cole, T., Frongillo, E.A., Cameron, N., Shekar, M., Yip, R., Bhatnagar, S., et al., 2000. Growth patterns of breastfed infants in seven countries. <i>Acta Paediatrica, International Journal of Paediatrics</i> 89:215-22.</p> <p>Vigoureux, S., Blondel, B., Ringa, V., Saurel-Cubizolles, M.-J., 2016. Who are the Women Who Work in Their Last Month of Pregnancy? Social and Occupational Characteristics and Birth Outcomes of Women Working Until the Last Month of Pregnancy in France. <i>Maternal &amp; Child Health Journal</i> 20:1774-79.</p> <p>Viguera, A.C., Tondo, L., Koukopoulos, A.E., Reginaldi, D., Lepri, B., Baldessarini, R.J., 2011. Episodes of mood disorders in 2,252 pregnancies and postpartum periods. <i>American Journal of Psychiatry</i> 168:1179-85.</p> <p>von der Lippe, E., Brettschneider, A.K., Gutsche, J., Poethko-Müller, C., 2014. Factors influencing the prevalence and duration of breastfeeding in Germany: results of the KiGGS study: first follow up (KiGGS Wave 1). [German]. <i>Bundesgesundheitsblatt, Gesundheitsforschung, Gesundheitsschutz</i> 57:849-59.</p> <p>Voskaridou, E., Ladis, V., Kattamis, A., Hassapopoulou, E., Economou, M., Kourakli, A., Maragkos, K., Kontogianni, K., Lafionatis, S., et al., 2012. A national registry of haemoglobinopathies in Greece: deducted demographics, trends in mortality and affected births. <i>Annals of Hematology</i> 91:1451-8.</p> <p>Waldenstrom, U., Cnattingius, S., Norman, M., Schytt, E., 2015. Advanced Maternal Age and Stillbirth Risk in Nulliparous and Parous Women. <i>Obstetrics and Gynecology</i> 126:355-62.</p> <p>Wallby, T., Hjern, A., 2009. Region of birth, income and breastfeeding in a Swedish county. <i>Acta Paediatrica</i> 98:1799-804.</p> <p>Wang, L., Wu, T., Anderson, J.L., Florence, J.E., 2011. Prevalence and Risk Factors of Maternal Depression During the First Three Years of Child Rearing. <i>Journal of Women's Health</i> (15409996) 20:711-18.</p> <p>Ward, M., Sheridan, A., Howell, F., Hegarty, I., O'Farrell, A., 2004. Infant feeding: Factors affecting initiation, exclusivity and duration. <i>Irish Medical Journal</i> 97:197-99.</p> <p>Weisman, O., Granat, A., Gilboa-schechtman, E., Singer, M., Gordon, I., Azulay, H., Kuint, J., Feldman, R., 2010. The experience of labor, maternal perception of the infant, and the mother's postpartum mood in a low-risk community cohort. <i>Archives of Women's Mental Health</i> 13:505.</p> <p>Weiss, B.D., Sheehan, C.P., Gushwa, L.L., 2009. Is low literacy a risk factor for symptoms of depression in postpartum women? <i>Journal of Reproductive Medicine</i> 54:563-8.</p> <p>Wenz-Gross, M., Weinreb, L., Upshur, C., 2016. Screening for Post-traumatic Stress Disorder in Prenatal Care: Prevalence and Characteristics in a Low-Income Population. <i>Maternal &amp; Child Health Journal</i> 20:1995-2002.</p> <p>Westdahl, C., Milan, S., Magriples, U., Kershaw, T.S., Rising, S.S., Ickovics, J.R., Westdahl, C., Milan, S., Magriples, U., et al., 2007. Social support and social conflict as predictors of prenatal depression. <i>Obstetrics &amp; Gynecology</i> 110:134-40.</p> <p>Winkvist, A., Brantsaeter, A.L., Brandhagen, M., Haugen, M., Meltzer, H.M., Lissner, L., 2015. Maternal prepregnant body mass index and gestational weight gain are associated with initiation and duration of breastfeeding among Norwegian mothers. <i>Journal of Nutrition</i> 145:1263-70.</p> <p>Wujcicka, W., Gaj, Z., Wilczynski, J., Sobala, W., Spiewak, E., Nowakowska, D., 2014. Impact of socioeconomic risk factors on the seroprevalence of cytomegalovirus infections in a cohort of pregnant Polish women between 2010 and 2011. <i>European Journal of Clinical Microbiology and Infectious Diseases</i> 33:1951-58.</p> |
|--|-----------------------------------------------------------------------------------------------------------------------------------------------------------------------------------------------------------------------------------------------------------------------------------------------------------------------------------------------------------------------------------------------------------------------------------------------------------------------------------------------------------------------------------------------------------------------------------------------------------------------------------------------------------------------------------------------------------------------------------------------------------------------------------------------------------------------------------------------------------------------------------------------------------------------------------------------------------------------------------------------------------------------------------------------------------------------------------------------------------------------------------------------------------------------------------------------------------------------------------------------------------------------------------------------------------------------------------------------------------------------------------------------------------------------------------------------------------------------------------------------------------------------------------------------------------------------------------------------------------------------------------------------------------------------------------------------------------------------------------------------------------------------------------------------------------------------------------------------------------------------------------------------------------------------------------------------------------------------------------------------------------------------------------------------------------------------------------------------------------------------------------------------------------------------------------------------------------------------------------------------------------------------------------------------------------------------------------------------------------------------------------------------------------------------------------------------------------------------------------------------------------------------------------------------------------------------------------------------------------------------------------------------------------------------------------------------------------------------------------------------------------------------------------------------------------------------------------------------------------------------------------------------------------------------------------------------------------------------------------------------------------------------------------------------------------------------------------------------------------------------------------------------------------------------------------------------------------------------------------------------------------------------------------------------------------------------------------------------------------------------------------------------------------------------------------------------------------------------------------------------------------------------------------------------------------------------------------------------------------------------------------------------------------------------------------------------------------------------------------------------------------------------------------------------------------------------------------------------------------------------------------------------------------------------------------------------------------------------------------------------------------------------------------------------------------------------------------------------------------------------------------------------------------------------------------------------------------------------------------------------------------------------------------------------------------------------------------------------------------------------------------------------------------------------------------------------------------------------------------------------------------------------------------------------------------------------------------------------------------------------------------------------------------------------------------------------------------------------------------------------------------------------------------------------------------------------------------------------------------------------------------------------------------------------------------------------------------------------------------------------------------------------------------------------------------------------------------------------------------------------------------------------------------------------------------------------------------------------------------------------------------------------------------------------------------------------------------------------------------------------------------------------------------------------------------------------------------------------------------------------------------------------------------------------------------------------------------------------------------------------------------------------------------------------------------------------------------------------------------------------------------------------------------------------------------------------------------------------------------------------------------------------------------------------------------------------------------------------------------------------------------------------------------------------------------------------------------------------------------------------------------------------------------------------------------------------------------------------------------------------------------------------------------------------------------------------------------------------------------------------------------------------------------------------------------------------------------------------------------------------------------------------------------------------------------------------------------------------------------------------------------------------------------------------------------------------------------------------------------------------------------------------------------------------------------------------------------------------------------------------------------------------------------------------------------------------------------------------------------------------------------------------------------------------------------------------------------------------------------------------------------------------------------------------------------------------------------------------------------------------------------------------------------------------------------------------------------------------------------------------------------------------------------------------------------------------------------------------------------------------------------------------------------------------------------------------------------------------------------------------------------------------------------------------------------------------------------------------------------------------------------------------------------------------------------------------------------------------------------------------------------------------------------------------------------------------------------------------------------------------------------------------------------------------------------------------------------------------------------------------------------------------------------------------------------------------------------------------------------------------------------------------------------------------------------------------------------------------------------------------------------------------------------------------------------------------------------------------------------------------------------------------------------------------------------------|

|                                                                                            |                                                                                                                                                                                                                                                                                                                                                                                                                                                                                                                                                                                                                                                                                                                                                                                                                                                                                                                                                                                                                                                                                                                                                                                                                                                                                                                                                                                                                                                                                                                                                                                                                                                                                                                                                                                                                                                                                                                                                                                                                                                                                                                                                                                                                                                                                                                                                                                                                                                                                                                                                                                                                                                                                                                                                                                                                                                                                                                                                                                                                                                                                                                                                                                                                                                                                                                                                                                                                                                                                                                                                                                                                                                                                                                                                                                                                                                                                                                                                                                                                                                                                                                                                                                                                                                                                                                                                                                                                                                                                                                                                                                                                                                                                                                                                                                                                                                                                                                                                                                                                                                                                                                                                                                                                                                                                                                                                                                                                                                                                                                                                                                                                                                                                                                                                                                                                                                                                                                                                                                                                                                                                                                                                                                                             |
|--------------------------------------------------------------------------------------------|-------------------------------------------------------------------------------------------------------------------------------------------------------------------------------------------------------------------------------------------------------------------------------------------------------------------------------------------------------------------------------------------------------------------------------------------------------------------------------------------------------------------------------------------------------------------------------------------------------------------------------------------------------------------------------------------------------------------------------------------------------------------------------------------------------------------------------------------------------------------------------------------------------------------------------------------------------------------------------------------------------------------------------------------------------------------------------------------------------------------------------------------------------------------------------------------------------------------------------------------------------------------------------------------------------------------------------------------------------------------------------------------------------------------------------------------------------------------------------------------------------------------------------------------------------------------------------------------------------------------------------------------------------------------------------------------------------------------------------------------------------------------------------------------------------------------------------------------------------------------------------------------------------------------------------------------------------------------------------------------------------------------------------------------------------------------------------------------------------------------------------------------------------------------------------------------------------------------------------------------------------------------------------------------------------------------------------------------------------------------------------------------------------------------------------------------------------------------------------------------------------------------------------------------------------------------------------------------------------------------------------------------------------------------------------------------------------------------------------------------------------------------------------------------------------------------------------------------------------------------------------------------------------------------------------------------------------------------------------------------------------------------------------------------------------------------------------------------------------------------------------------------------------------------------------------------------------------------------------------------------------------------------------------------------------------------------------------------------------------------------------------------------------------------------------------------------------------------------------------------------------------------------------------------------------------------------------------------------------------------------------------------------------------------------------------------------------------------------------------------------------------------------------------------------------------------------------------------------------------------------------------------------------------------------------------------------------------------------------------------------------------------------------------------------------------------------------------------------------------------------------------------------------------------------------------------------------------------------------------------------------------------------------------------------------------------------------------------------------------------------------------------------------------------------------------------------------------------------------------------------------------------------------------------------------------------------------------------------------------------------------------------------------------------------------------------------------------------------------------------------------------------------------------------------------------------------------------------------------------------------------------------------------------------------------------------------------------------------------------------------------------------------------------------------------------------------------------------------------------------------------------------------------------------------------------------------------------------------------------------------------------------------------------------------------------------------------------------------------------------------------------------------------------------------------------------------------------------------------------------------------------------------------------------------------------------------------------------------------------------------------------------------------------------------------------------------------------------------------------------------------------------------------------------------------------------------------------------------------------------------------------------------------------------------------------------------------------------------------------------------------------------------------------------------------------------------------------------------------------------------------------------------------------------------------------------------------------|
|                                                                                            | <p>Yucesoy, G., Ozkan, S., Yildiz, M., Cakiroglu, Y., Bodur, H., 2011. Postpartum depression: Prevalence and contributing risk factors. <i>Turkiye Klinikleri Jinekoloji Obstetrik</i> 21:06-Dec.</p> <p>Zachariassen, G., Faerk, J., Grytter, C., Esberg, B.H., Juvonen, P., Halken, S., 2010. Factors associated with successful establishment of breastfeeding in very preterm infants. <i>Acta Paediatrica, International Journal of Paediatrics</i> 99:1000-04.</p> <p>Zadzinska, E., Sitek, A., Rosset, I., 2016. Relationship between pre-natal factors, the perinatal environment, motor development in the first year of life and the timing of first deciduous tooth emergence. <i>Annals of Human Biology</i> 43:25-33.</p> <p>Zakarija-Grković, I., Šegvić, O., Vučković Vukušić, A., Lozančić, T., Božinović, T., Čuže, A., Burmaz, T., 2016. Predictors of suboptimal breastfeeding: an opportunity for public health interventions. <i>European Journal of Public Health</i> 26:282-89.</p> <p>Zeitlin, J., Gwanfogbe, C.D., Delmas, D., Pilkington, H., Jarreau, P.H., Chabernaude, J.L., Breart, G., Papiernik, E., 2008. Risk factors for not delivering in a level III unit before 32 weeks of gestation: Results from a population-based study in Paris and surrounding districts in 2003. <i>Paediatric and Perinatal Epidemiology</i> 22:126-35.</p> <p>Zielinska, M.A., Hamulka, J., 2018. Reasons for non-exclusive breast-feeding in the first 6 months. <i>Pediatrics International</i> 60:276-81.</p> <p>Zur, M., Shmuel, B.S., Bilenko, N., Hadar, A., Bulotin, A., Sheiner, E., 2004. [Breastfeeding patterns according to ethnic origin in two Well Child-Care Clinics in Beer Sheva and Ofakim]. <i>Harefuah</i> 143:475-8, 551.</p> <p>Πέτρος, Γ., Ελισάβετ, Φ., Ευγενία, Τ., Ολυμπία, Κ., Αγγελική, Μ., Ειρήνη, Β., Μάμας, Θ., 2018. Η επίδραση της κατάθλιψης στις συνήθειες ύπνου των εγκύων. <i>Rostrum of Asclepius / Vima tou Asklipeiou</i> 17:314-32.</p>                                                                                                                                                                                                                                                                                                                                                                                                                                                                                                                                                                                                                                                                                                                                                                                                                                                                                                                                                                                                                                                                                                                                                                                                                                                                                                                                                                                                                                                                                                                                                                                                                                                                                                                                                                                                                                                                                                                                                                                                                                                                                                                                                                                                                                                                                                                                                                                                                                                                                                                                                                                                                                                                                                                                                                                                                                                                                                                                                                                                                                                                                                                                                                                                                                                                                                                                                                                                                                                                                                                                                                                                                                                                                                                                                                                                                                                                                                                                                                                                                                                                                                                                                                                                           |
| <p>The paper is not a primary observational study (includes systematic reviews) (n=67)</p> | <p>Abayomi, J., Wood, L., Spelman, S., Morrison, G., Purewal, T., 2013. The multidisciplinary management of type 2 and gestational diabetes in pregnancy. <i>British Journal of Midwifery</i> 21:236-42.</p> <p>Abu-Saad, K., Fraser, D., 2010. Maternal nutrition and birth outcomes. <i>Epidemiologic Reviews</i> 32: May-25.</p> <p>Ahlberg, N., Vangen, S., 2005. [Pregnancy and birth in multicultural Norway]. <i>Tidsskrift for Den Norske Laegeforening</i> 125:586-8.</p> <p>Albu, A., Anca, A., Horhoianu, V., Horhoianu, I., 2014. Predictive factors for intrauterine growth restriction. <i>Journal of Medicine and Life</i> 7:165.</p> <p>Alves, E., Correia, S., Barros, H., Azevedo, A., Alves, E., Correia, S., Barros, H., Azevedo, A., 2012. Prevalence of self-reported cardiovascular risk factors in Portuguese women: a survey after delivery. <i>International Journal of Public Health</i> 57:837-47.</p> <p>Amjad, S., Voaklander, D., Ospina, M.B., MacDonald, I., Chandra, S., Chambers, T., Osornio-Vargas, A., 2019. Social determinants of health and adverse maternal and birth outcomes in adolescent pregnancies: A systematic review and meta-analysis. <i>Paediatric &amp; Perinatal Epidemiology</i> 33:88-99.</p> <p>Anonymous, 2002. Deprivation blamed for low birth weight babies. <i>The practising midwife</i> 5:7.</p> <p>Anonymous, 2006. Obstetric fistula. <i>Nursing times</i> 102:27.</p> <p>Appiah-Sakyi, K., Konje, J.C., 2015. Prevention of preterm labour. <i>Obstetrics, Gynaecology and Reproductive Medicine</i> 25:255-60.</p> <p>Appiah-Sakyi, K., Shaikh, H., Abid, H., 2017. Preventing preterm labour, our current understanding. <i>Obstetrics and Gynaecology Forum</i> 27:Dec-19.</p> <p>Arai, L., 2007. Peer and neighbourhood influences on teenage pregnancy and fertility: qualitative findings from research in English communities. <i>Health &amp; Place</i> 13:87-98.</p> <p>Arntzen, A., Nybo Andersen, A.M., 2004. Social determinants for infant mortality in the Nordic countries, 1980-2001. <i>Scandinavian Journal of Public Health</i> 32:381-89.</p> <p>Artieta-Pinedo, I., Paz-Pascual, C., Grandes, G., Remiro-Fernandezdegamboa, G., Odriozola-Hermosilla, I., Bacigalupe, A., Payo, J., 2010. The Benefits of Antenatal Education for the Childbirth Process in Spain. <i>Nursing Research</i> 59:194.</p> <p>Aylward, G.P., 2010. Methodological considerations in neurodevelopmental outcome studies of infants born prematurely. <i>Neurodevelopmental Outcomes of Preterm Birth: From Childhood to Adult Life</i>:164-75.</p> <p>Azria, E., Stewart, Z., Gonthier, C., Estellat, C., Deneux-Tharaux, C., 2015. Social inequalities in maternal health. [French]. <i>Gynecologie Obstetrique et Fertilité</i> 43:676-82.</p> <p>Barona-Vilar, C., Escribá-Agüir, V., Ferrero-Gandía, R., 2009. A qualitative approach to social support and breast-feeding decisions. <i>Midwifery</i> 25:187-94.</p> <p>Blumenshine, P., Egerter, S., Barclay, C.J., Cubbin, C., Braveman, P.A., 2010. Socioeconomic Disparities in Adverse Birth Outcomes: A Systematic Review. <i>American Journal of Preventive Medicine</i> 39:263-72.</p> <p>Bonde, J.P.E., Jørgensen, K.T., Bonzini, M., Palmer, K.T., 2013. Risk of miscarriage and occupational activity: a systematic review and meta-analysis regarding shift work, working hours, lifting, standing and physical workload. <i>Scandinavian journal of work, environment &amp; health</i> 39:325.</p> <p>Bonzini, M., Coggon, D., Palmer, K.T., 2007. Risk of prematurity, low birthweight and pre-eclampsia in relation to working hours and physical activities: a systematic review. <i>Occupational and Environmental Medicine</i> 64:228-43.</p> <p>Boskabadi, H., Zakerihamidi, M., 2019. Evaluation of Maternal Risk Factors, Delivery, and Neonatal Outcomes of Premature Rupture of Membrane: A Systematic Review Study. <i>Journal of Pediatrics Review</i> 7:77-87.</p> <p>Brüggmann, D., Wagner, C., Klingelhöfer, D., Schöffel, N., Bendels, M., Louwen, F., Jaque, J., Groneberg, D., 2017. Maternal depression research: socioeconomic analysis and density-equalizing mapping of the global research architecture. <i>Archives of Women's Mental Health</i> 20:25-37.</p> <p>Cai, C., Vandermeer, B., Khurana, R., Nerenberg, K., Featherstone, R., Sebastianski, M., Davenport, M.H., 2019a. The impact of occupational activities during pregnancy on pregnancy outcomes: a systematic review and meta-analysis. <i>American Journal of Obstetrics and Gynecology</i>.</p> <p>Cai, C., Vandermeer, B., Khurana, R., Nerenberg, K., Featherstone, R., Sebastianski, M., Davenport, M.H., 2019b. The impact of occupational shift work and working hours during pregnancy on health outcomes: a systematic review and meta-analysis. <i>American Journal of Obstetrics and Gynecology</i>.</p> <p>Campbell, E.E., Seabrook, J.A., 2016. The Influence of Socioeconomic Status on Adverse Birth Outcomes. <i>Canadian Journal of Midwifery Research &amp; Practice</i> 15:Oct-20.</p> <p>Carroll, P., 2011. Legally Induced Abortion: The Demographic Profile and Hazards to the Health of Women. <i>Studies on Ethno-Medicine</i> 5:01-Oct.</p> <p>Chircor, L., Mehedinti, R., Hincu, M., 2009. Risk factors related to omphalocele and gastroschisis. <i>Romanian Journal of Morphology and Embryology</i> 50:645-49.</p> <p>Collison, D., Dey, C., Hannah, G., Stevenson, L., 2007. Income inequality and child mortality in wealthy nations. <i>Journal of Public Health</i> 29:114-17.</p> <p>Connolly, G., Shuhai, Z.M., McKenna, P., Geary, M., 2005. Birth-weight trends in primiparous women in the twentieth century. <i>Irish Medical Journal</i> 98:6-7.</p> <p>Coxon, K., Sandall, J., Fulop, N.J., 2014. To what extent are women free to choose where to give birth? How discourses of risk, blame and responsibility influence birth place decisions. <i>Health, Risk &amp; Society</i> 16:51-67.</p> <p>Currie, J., 2011. Inequalities at birth: Some causes and consequences. <i>Perspektiven der Wirtschaftspolitik</i> 12:42-65.</p> |

de Bernabé, J.V., Soriano, T., Albaladejo, R., Juarranz, M., Calle, M.a.E., Martínez, D., Domínguez-Rojas, V., 2004. Risk factors for low birth weight: a review. *European Journal of Obstetrics & Gynecology and Reproductive Biology* 116:3-15.

de Graaf, J.P., Steegers, E.A., Bonsel, G.J., 2013. Inequalities in perinatal and maternal health. *Current Opinion in Obstetrics and Gynecology* 25:98-108.

Donkin, A., Marmot, M., 2018. Health inequalities and the importance of action on perinatal risk factors. Leach, Penelope [Ed] (2018) *Transforming infant wellbeing: Research, policy and practice for the first 1001 critical days* (pp 69-71) xxii, 284 pp New York, NY, US: Routledge/Taylor & Francis Group// US:69-71.

Drife, J.O., 1993. Maternal "near miss" reports? *BMJ: British Medical Journal* 307:1087.

Ek, M., Stjernholm, Y.V., Günther, A., Hällsjö-Sander, C., Herman-Jacobsen, P., 2016. Reumatisk hjärtsjukdom bakom livshotande hjärtsvikt hos gravid. *Lakartidningen* 113:984.

Ferrer Serret, L., Solsona Pairo, M., 2018. The place of abortion in the pregnancy decision-making process in young adult women in Catalonia, Spain. *Sociology of Health & Illness* 40:1087-103.

Flenady, V., Koopmans, L., Middleton, P., Frøen, J.F., Smith, G.C., Gibbons, K., Coory, M., Gordon, A., Ellwood, D., et al., 2011. Major risk factors for stillbirth in high-income countries: a systematic review and meta-analysis. *The Lancet* 377:1331-40.

Gardosi, J., Francis, A., 2010. Social deprivation, smoking and maternal characteristics as risk factors for small-for-gestational age birthweight. *Archives of Disease in Childhood-Fetal and Neonatal Edition* 95:Fa96-Fa96.

Goldenberg, R.L., Culhane, J.F., Iams, J.D., Romero, R., 2008. Epidemiology and causes of preterm birth. *The Lancet* 371:75-84.

Healey, C., Morriss, R., Henshaw, C., Wadoo, O., Sajjad, A., Scholefield, H., Kinderman, P., 2013. Self-harm in postpartum depression and referrals to a perinatal mental health team: an audit study. *Archives of Women's Mental Health* 16:237.

Hobel, C., Culhane, J., 2003. Role of psychosocial and nutritional stress on poor pregnancy outcome. *The Journal of Nutrition* 133:1709S-175.

Hollowell, J., Kurinczuk, J.J., Brocklehurst, P., Gray, R., 2011. Social and ethnic inequalities in infant mortality: a perspective from the United Kingdom, *Seminars in Perinatology*. Elsevier, pp. 240-44.

Johnson, C., Jones, S., Paranjthy, S., Wales, N., 2014. Low Birth Weight. *Public Health Wales*.

Jorgensen, T., Mortensen, L.H., Andersen, A.-M.N., 2008. Social inequality in fetal and perinatal mortality in the Nordic countries. *Scandinavian Journal of Public Health* 36:635-49.

Kim, D., Saada, A., 2013. The social determinants of infant mortality and birth outcomes in Western developed nations: a cross-country systematic review. *International Journal of Environmental Research and Public Health* 10:2296-335.

Kingdon, C., Roberts, D., Turner, M.A., Storey, C., Crossland, N., Finlayson, K.W., Downe, S., 2019. Inequalities and stillbirth in the UK: a meta-narrative review. *BMJ open* 9:e029672.

Knight, M., Kurinczuk, J.J., Tuffnell, D., Brocklehurst, P., 2005. The UK obstetric surveillance system for rare disorders of pregnancy. *BJOG: An International Journal of Obstetrics & Gynaecology* 112:263-65.

Kramer, M.R., Hogue, C.R., 2009. What causes racial disparities in very preterm birth? A biosocial perspective. *Epidemiologic Reviews* 31:84-98.

Kramer, M.S., Seguin, L., Lydon, J., Goulet, L., 2000. Socio-economic disparities in pregnancy outcome: why do the poor fare so poorly? *Paediatric and perinatal epidemiology* 14:194-210.

Lancaster, C.A., Gold, K.J., Flynn, H.A., Yoo, H., Marcus, S.M., Davis, M.M., Lancaster, C.A., Gold, K.J., Flynn, H.A., et al., 2010. Risk factors for depressive symptoms during pregnancy: a systematic review. *American Journal of Obstetrics & Gynecology* 202:May-14.

Lusk, S.L., Somers, C.A., 2000. Working conditions and adverse pregnancy outcomes. *Aaohn Journal* 48:414-17.

Macfarlane, A.J., 2004. Social class and elective caesareans in the NHS: Analysis is not really about social class. *BMJ* 329:291.

Macintyre, S., Maciver, S., Sooman, A., 1993. Area, class and health: should we be focusing on places or people? *Journal of Social Policy* 22:213-34.

Maher, J., Macfarlane, A., 2004. Trends in live births and birthweight by social class, marital status and mother's age, 1976-2000, *Health Statistics Quarterly*. Office of National Statistics, London, pp. 34-43.

Maness, S.B., Bui, E.R., 2016. Associations Between Social Determinants of Health and Pregnancy Among Young People: A Systematic Review of Research Published During the Past 25 Years. *Public Health Reports* 131:86-99.

McCowan, L., Horgan, R.P., 2009. Risk factors for small for gestational age infants. *Best Practice & Research Clinical Obstetrics & Gynaecology* 23:779-93.

Metcalfe, A., Lail, P., Ghali, W.A., Sauve, R.S., 2011. The association between neighbourhoods and adverse birth outcomes: A systematic review and meta-analysis of multi-level studies. *Paediatric and Perinatal Epidemiology* 25:236-45.

Milligan, R.A., Pugh, L.C., Bronner, Y.L., Spatz, D.L., Brown, L.P., 2000. Breastfeeding duration among low income women. *Journal of Midwifery and Women's Health* 45:246-52.

Mortensen, L.H., Diderichsen, F., Davey Smith, G., Nybo Andersen, A.M., 2009. Time is on whose side? Time trends in the association between maternal social disadvantage and offspring fetal growth. A study of 1 409 339 births in Denmark, 1981-2004. *Journal of Epidemiology and Community Health* 63:281-85.

Moser, K., 2009. Gestation-specific infant mortality by social and biological factors among babies born in Enland and Wales in 2006, *Health statistics quarterly Office for National Statistics*, pp. 78-87.

Mozurkewich, E.L., Luke, B., Avni, M., Wolf, F.M., 2000. Working conditions and adverse pregnancy outcome: a meta-analysis. *Obstetrics & Gynecology* 95:623-35.

Palmer, K.T., Bonzini, M., Harris, E.C., Linaker, C., Bonde, J.P., 2013. Work activities and risk of prematurity, low birth weight and pre-eclampsia: an updated review with meta-analysis. *Occupational and Environmental Medicine* 70:213-22.

Puthussery, S., 2016. Perinatal outcomes among migrant mothers in the United Kingdom: is it a matter of biology, behaviour, policy, social determinants or access to health care? *Best Practice & Research Clinical Obstetrics & Gynaecology* 32:39-49.

Ruiz, M., Goldblatt, P., Morrison, J., Kukla, L., Švancara, J., Riitta-Järvelin, M., Taanila, A., Saurel-Cubizolles, M.-J., Lioret, S., et al., 2015. Mother's education and the risk of preterm and small for gestational age birth: a DRIVERS meta-analysis of 12 European cohorts. *Journal of Epidemiology & Community Health* 69:826-33.

Sahu, P., Srivastav, U.R., Jain, M., 2015. Occupational predictors of low birth weight: A systematic review of literature. *Indian Journal of Health & Wellbeing* 6.

Salihi, H., Myers, J., August, E., 2012. Pregnancy in the workplace. *Occupational Medicine* 62:88-97.

Sarkj, M., Parlesak, A., Robertson, A., 2019. Comparison of national cross-sectional breast-feeding surveys by maternal education in Europe (2006-2016). *Public Health Nutrition* 22:848-61.

Saugstad, L.F., 1999. Optimality of the birth population reduces learning and behaviour disorders and sudden infant death after the first month. *Acta Paediatrica, International Journal of Paediatrics, Supplement* 88:Sep-28.

Shah, P.S., Births, K.S.G.o.D.o.P.L.B., 2010. Paternal factors and low birthweight, preterm, and small for gestational age births: a systematic review. *American Journal of Obstetrics and Gynecology* 202:103-23.

Site, T.P., 2011. Low birthweight babies, United Kingdom.

|                                                       |                                                                                                                                                                                                                                                                                                                                                                                                                                                                                                                                                                                                                                                                                                                                                                                                                                                                                                                                                                                                                                                                                                                                                                                                                                                                                                                                                                                                                                                                                                                                                                                                                                                                                                                                                                                                                                                                                                                                                                                                                                                                                                                                                                                                                                                                                                                                                                                                                                                                                                                                                                                                                                                                                                                                                                                                                                                                                                                                                                                                                                                                                                                                                                                                                                                                                                                                                                                                                                                                                                                                                                                                                                                                                                                                                                                                                                                                                                                                                                                                                                                                                                                                                                                                                                                           |
|-------------------------------------------------------|-----------------------------------------------------------------------------------------------------------------------------------------------------------------------------------------------------------------------------------------------------------------------------------------------------------------------------------------------------------------------------------------------------------------------------------------------------------------------------------------------------------------------------------------------------------------------------------------------------------------------------------------------------------------------------------------------------------------------------------------------------------------------------------------------------------------------------------------------------------------------------------------------------------------------------------------------------------------------------------------------------------------------------------------------------------------------------------------------------------------------------------------------------------------------------------------------------------------------------------------------------------------------------------------------------------------------------------------------------------------------------------------------------------------------------------------------------------------------------------------------------------------------------------------------------------------------------------------------------------------------------------------------------------------------------------------------------------------------------------------------------------------------------------------------------------------------------------------------------------------------------------------------------------------------------------------------------------------------------------------------------------------------------------------------------------------------------------------------------------------------------------------------------------------------------------------------------------------------------------------------------------------------------------------------------------------------------------------------------------------------------------------------------------------------------------------------------------------------------------------------------------------------------------------------------------------------------------------------------------------------------------------------------------------------------------------------------------------------------------------------------------------------------------------------------------------------------------------------------------------------------------------------------------------------------------------------------------------------------------------------------------------------------------------------------------------------------------------------------------------------------------------------------------------------------------------------------------------------------------------------------------------------------------------------------------------------------------------------------------------------------------------------------------------------------------------------------------------------------------------------------------------------------------------------------------------------------------------------------------------------------------------------------------------------------------------------------------------------------------------------------------------------------------------------------------------------------------------------------------------------------------------------------------------------------------------------------------------------------------------------------------------------------------------------------------------------------------------------------------------------------------------------------------------------------------------------------------------------------------------------------------|
|                                                       | <p>Spencer, N., Bambang, S., Logan, S., Gill, L., 1999. Socioeconomic status and birth weight: comparison of an area-based measure with the Registrar General's social class. <i>Journal of Epidemiology &amp; Community Health</i> 53:495-98.</p> <p>Spencer, N., Logan, S., 2002. Social influences on birth weight. <i>BMJ Publishing Group</i>.</p> <p>Spinelli, A., Boccuzzo, G., Grandolfo, M.E., Buratta, V., Pediconi, M., Donati, S., Frova, L., Timperi, F., 1999. [Evolution of voluntary interruption of pregnancy in Italy from its legalization until today]. <i>Annali Dell'Istituto Superiore di Sanita</i> 35:307-14.</p> <p>Stocker, L.J., Macklon, N.S., Cheong, Y.C., Bewley, S.J., 2014. Influence of shift work on early reproductive outcomes: a systematic review and meta-analysis. <i>Obstetrics &amp; Gynecology</i> 124:99-110.</p> <p>Stojanovic, M., Bojanic, V., Musovic, D., Milosevic, Z., Stojanovic, D., Visnjic, A., Vucic, M., Milosavljevic, I., Vidanovic, M., 2010. Maternal smoking during pregnancy and socioeconomic factors as predictors of low birth weight in term pregnancies in Nis. [Croatian]. <i>Vojnosanitetski Pregled</i> 67:145-50.</p> <p>Thomson, G., Delap, N.F., Balaam, M.-C., Van Lessen, L., 2017. Caring to make a difference with vulnerable women: the impact of targeted support on birth-related outcomes and experiences. <i>Practising Midwife</i> 20:6.</p> <p>Tooth, L., Mishra, G.D., 2015. Mother's education and adverse birth outcomes. <i>BMJ Publishing Group Ltd</i>.</p> <p>Torchin, H., Ancel, P.Y., Jarreau, P.H., Goffinet, F., 2015. Epidemiology of preterm birth: Prevalence, recent trends, short- and long-term outcomes. [French]. <i>Journal de Gynecologie Obstetrique et Biologie de la Reproduction</i> 44:723-31.</p> <p>Van Beukering, M., Van Melick, M., Mol, B., Frings-Dresen, M., Hulshof, C., 2014. Physically demanding work and preterm delivery: a systematic review and meta-analysis. <i>International Archives of Occupational and Environmental Health</i> 87:809-34.</p> <p>Van Melick, M., Van Beukering, M., Mol, B., Frings-Dresen, M., Hulshof, C., 2014. Shift work, long working hours and preterm birth: a systematic review and meta-analysis. <i>International Archives of Occupational and Environmental Health</i> 87:835-49.</p> <p>Vos, A.A., Posthumus, A.G., Bonsel, G.J., Steegers, E.A.P., Denktas, S., 2014. Deprived neighborhoods and adverse perinatal outcome: a systematic review and meta-analysis. <i>Acta Obstetrica et Gynecologica Scandinavica</i> 93:727-40.</p> <p>Waterstone, M., Bewley, S., Wolfe, C., Murphy, D.J., 2001. Incidence and predictors of severe obstetric morbidity: Case-control study / Commentary: <i>BMJ BMJ. British Medical Journal</i> 322:1089-93// discussion 93-4.</p>                                                                                                                                                                                                                                                                                                                                                                                                                                                                                                                                                                                                                                                                                                                                                                                                                                                                                                                                                                                                                                                                                                                                                                                                                                                                                                                                                                                                             |
| The paper is an exact duplicate (n=4)                 | <p>Al-Zirql, I., Vangen, S., Forsen, L., Stray-Pedersen, B., 2008. Prevalence and risk factors of severe obstetric haemorrhage. <i>BJOG: An International Journal of Obstetrics &amp; Gynaecology</i> 115:1265-72.</p> <p>Cammu, H.M.D.P., Martens, G.E., Keirse, M.J.N.C.M.D.D.D.P.H.F.F., 2011. Mothers' Level of Education and Childbirth Interventions: A Population-based Study in Flanders, Northern Belgium. <i>Birth</i> 38:191.</p> <p>de Graaf, J.P., Steegers, E.A., Bonsel, G.J., 2013. Inequalities in perinatal and maternal health. <i>Current Opinion in Obstetrics and Gynecology</i> 25:98-108.</p> <p>Fitzpatrick, K.E., Sellers, S., Spark, P., Kurinczuk, J.J., Brocklehurst, P., Knight, M., 2012. Incidence and risk factors for placenta accreta/increta/percreta in the UK: a national case-control study. <i>PLoS One</i> 7:e52893.</p> <p>Health, R.C.o.P.a.C., 2017. State of child health 2 - Conception, pregnancy and infancy indicators.</p> <p>Lindquist, A., Knight, M., Kurinczuk, J.J., 2013. Variation in severe maternal morbidity according to socioeconomic position: a UK national case-control study. <i>BMJ open</i> 3:e002742.</p> <p>Madden, D., 2015. The relationship between low birth weight and socioeconomic status in Ireland-corrigendum. <i>Journal of Biosocial Science</i> 47:559-63.</p> <p>Maternal, N., 2014. Saving Lives, Improving Mothers' Care. <i>MBRRACE-UK</i>.</p> <p>MBRACE, M.B., Smith, L., Evans, T.A., Hyman-Taylor, P., Kurinczuk, J., Field, D., Smith, P., Draper, E., collaboration, M.-U., Perinatal Mortality Surveillance Report UK Perinatal Deaths for births from January to December 2013. <i>Leicester: The Infant Mortality and Morbidity Group, Department of Health Sciences, University of Leicester</i>:2015.</p> <p>Moser, K., Macfarlane, A., Chow, Y.H., Hilder, L., Dattani, N., 2007. Introducing new data on gestation-specific infant mortality among babies born in 2005 in England and Wales, <i>Health Statistics Quarterly</i>. Office of National Statistics, p. 13.</p> <p>Nair, M., Kurinczuk, J., Brocklehurst, P., Sellers, S., Lewis, G., Knight, M., 2015. Factors associated with maternal death from direct pregnancy complications: a UK national case-control study. <i>BJOG: An International Journal of Obstetrics &amp; Gynaecology</i> 122:653-62.</p> <p>Nair, M., Kurinczuk, J.J., Knight, M., 2014. Ethnic variations in severe maternal morbidity in the UK-a case control study. <i>PLoS One</i> 9:e95086.</p> <p>Puthussery, S., 2016. Perinatal outcomes among migrant mothers in the United Kingdom: is it a matter of biology, behaviour, policy, social determinants or access to health care? <i>Best Practice &amp; Research Clinical Obstetrics &amp; Gynaecology</i> 32:39-49.</p> <p>Räsänen, S., Kramer, M.R., Gissler, M., Saari, J., Heinonen, S., 2014. Unemployment at municipality level is associated with an increased risk of small for gestational age births -- a multilevel analysis of all singleton births during 2005-2010 in Finland. <i>International Journal for Equity in Health</i> 13:215-35.</p> <p>Smeeton, N.C., Rona, R.J., Dobson, P., Cochrane, R., Wolfe, C., 2004. Assessing the determinants of stillbirths and early neonatal deaths using routinely collected data in an inner city area. <i>BMC Medicine</i> 2:27.</p> <p>Stembera, Z., Velebil, P., 2000. Development of reproductive health in women in the Czech Republic 1993-1997. IV. Relation between contraception and induced abortion. [Czech]. <i>Ceska Gynekologie / Ceska lekarska spolecnost J Ev. Purkyne</i>. 65:250-56.</p> <p>Stojanović, M., Bojanić, V., Mušović, D., Milošević, Z., Stojanović, D., Višnjić, A., Vučić, M., Milosavljevic, I., Vidanovic, M., 2010. Maternal smoking during pregnancy and socioeconomic factors as predictors of low birth weight in term pregnancies in Niš. <i>Vojnosanitetski Pregled</i> 67:145-50.</p> <p>Vinturache, A., McKeating, A., Daly, N., Sheehan, S., Turner, M., 2017. Maternal body mass index and the prevalence of spontaneous and elective preterm deliveries in an Irish obstetric population: a retrospective cohort study. <i>BMJ open</i> 7:e015258.</p> |
| The paper describes a conference abstract only (n=10) | <p>Baker, R., Orton, E., Kendrick, D., Tata, L.J., 2015. Maternal depression in the 5 years after childbirth among women with and without perinatal depression: a population-based cohort study. <i>The Lancet</i> 386:S22.</p> <p>Emond, A., Drewett, R., Blair, P., Emmett, P., 2007. Postnatal factors associated with failure to thrive in term infants in the Avon Longitudinal Study of Parents and Children. <i>Child: Care, Health and Development</i> 33:351.</p> <p>Meltzer-Brody, S., 2013. Mental illness is prevalent among UK women in the perinatal period and is associated with socioeconomic deprivation. <i>Evidence-Based Mental Health</i> 16:57.</p> <p>Olsen, J., Basso, O., Christensen, K., 1999. Male factors and socioeconomic indicators correlate with the risk of spontaneous abortion. <i>Journal of Obstetrics and Gynaecology</i> 19:49-53.</p> <p>Petherick, E., Parslow, R., McKinney, P., Tufnell, D., Leon, D., Raynor, P., Lawlor, D., Wright, J., 2010. P13 Association of prenatal and postnatal smoking and alcohol consumption on birth weight in the white British population in Bradford: preliminary findings from the born in Bradford study. <i>Journal of Epidemiology &amp; Community Health</i> 64:A38-9.</p> <p>Sibai, B.M., 1990. Eclampsia: VI. Maternal-perinatal outcome in 254 consecutive cases. <i>American Journal of Obstetrics and Gynecology</i> 163:1049-54.</p>                                                                                                                                                                                                                                                                                                                                                                                                                                                                                                                                                                                                                                                                                                                                                                                                                                                                                                                                                                                                                                                                                                                                                                                                                                                                                                                                                                                                                                                                                                                                                                                                                                                                                                                                                                                                                                                                                                                                                                                                                                                                                                                                                                                                                                                                                                                                                                                                                                                                                                                                                                                                                                                                                                                                                                                                                           |

|  |                                                                                                                                                                                                                                                                                                                                                                                                                                                                                                                                                                                                                                                                                                                                                                                                                                                                                                                                                                                                                                                                                                                                                                                                                                                                                     |
|--|-------------------------------------------------------------------------------------------------------------------------------------------------------------------------------------------------------------------------------------------------------------------------------------------------------------------------------------------------------------------------------------------------------------------------------------------------------------------------------------------------------------------------------------------------------------------------------------------------------------------------------------------------------------------------------------------------------------------------------------------------------------------------------------------------------------------------------------------------------------------------------------------------------------------------------------------------------------------------------------------------------------------------------------------------------------------------------------------------------------------------------------------------------------------------------------------------------------------------------------------------------------------------------------|
|  | <p>Sliwa, K., Mebazaa, A., Hilfiker-Kleiner, D., Petrie, M.C., Maggioni, A.P., Laroche, C., Regitz-Zagrosek, V., Schaufelberger, M., Tavazzi, L., et al., 2017. Clinical characteristics of patients from the worldwide registry on peripartum cardiomyopathy (PPCM): EURObservational Research Programme in conjunction with the Heart Failure Association of the European Society of Cardiology Study Group on PPCM. <i>European Journal of Heart Failure</i> 19:1131-41.</p> <p>Taylor-Robinson, D., Agarwal, U., Platt, M.J., Diggle, P., Yoxall, B., Alfirevic, Z., 2010. P16 Quantifying the risk of deprivation on preterm birth in UK maternity units. <i>Journal of Epidemiology &amp; Community Health</i> 64:A39-A39.</p> <p>West, J., Lawlor, D.A., Fairley, L., Wright, J., 2010. 028 Birth size differences between white and Pakistani-origin infants by generation: results from the Born in Bradford Cohort Study. <i>Journal of Epidemiology &amp; Community Health</i> 64:A11-A11.</p> <p>Wilding, S., Ziauddeen, N., Roderick, P., Alwan, N.A., 2018. Socioeconomic inequalities in risk of small for gestational age birth in primiparous and multiparous women: analysis of a population-based cohort in the south of England. <i>The Lancet</i> 392:S92.</p> |
|--|-------------------------------------------------------------------------------------------------------------------------------------------------------------------------------------------------------------------------------------------------------------------------------------------------------------------------------------------------------------------------------------------------------------------------------------------------------------------------------------------------------------------------------------------------------------------------------------------------------------------------------------------------------------------------------------------------------------------------------------------------------------------------------------------------------------------------------------------------------------------------------------------------------------------------------------------------------------------------------------------------------------------------------------------------------------------------------------------------------------------------------------------------------------------------------------------------------------------------------------------------------------------------------------|

## Supplementary appendix S8: Duplicate datasets

| Cohort name | Publication 1                                                                                                                                                                                                                                                           | Publication 2                                                                                                                                                                                                                                | Decision                                                                                                                                                                                                                                                                                                                                                                                                                                                                                                                                                                                                          |
|-------------|-------------------------------------------------------------------------------------------------------------------------------------------------------------------------------------------------------------------------------------------------------------------------|----------------------------------------------------------------------------------------------------------------------------------------------------------------------------------------------------------------------------------------------|-------------------------------------------------------------------------------------------------------------------------------------------------------------------------------------------------------------------------------------------------------------------------------------------------------------------------------------------------------------------------------------------------------------------------------------------------------------------------------------------------------------------------------------------------------------------------------------------------------------------|
| ONS         | <p>ONS<sup>1</sup></p> <p><b>Study period:</b> 1990-2017</p> <p><b>Sample size:</b></p> <p><b>Outcomes:</b> Neonatal death, perinatal mortality, VLBW, LBW, birth weight &lt; 3,000 g and birthweight &gt; 4,000 g</p> <p><b>Exposures:</b> Social class</p>            | <p>Maier et al.<sup>2</sup></p> <p><b>Study period:</b> 1990, 1995, 2000</p> <p><b>Sample size:</b> 172,168</p> <p><b>Outcomes:</b> LBW</p> <p><b>Exposures:</b> Social class</p>                                                            | <p><b>Issue:</b></p> <p>LBW by social class reported for the years 1990, 1995 and 2000 in Maier et al.<sup>2</sup> All years included in ONS.<sup>1</sup></p> <p><b>Decision:</b></p> <p>The ONS<sup>1</sup> data covers the period 1990 to 2017 annually, so the Maier et al.<sup>2</sup> publication is excluded as it only represented three years of data already included in the ONS.<sup>1</sup></p>                                                                                                                                                                                                        |
| ONS         | <p>ONS<sup>1</sup></p> <p><b>Study period:</b> 1990-2017</p> <p><b>Sample size:</b></p> <p><b>Outcomes:</b> Neonatal death, perinatal mortality, VLBW, LBW, birth weight &lt; 3,000 g and birthweight &gt; 4,000 g</p> <p><b>Exposures:</b> Social class/occupation</p> | <p>Moser and Power<sup>3</sup></p> <p><b>Study period:</b> 1993-2000</p> <p><b>Sample size:</b> 583,027</p> <p><b>Outcomes:</b> LBW</p> <p><b>Exposures:</b> Social class/occupation</p>                                                     | <p><b>Issue:</b></p> <p>LBW by social class reported for the years 1993-2000 in Moser and Power.<sup>3</sup> All years included in ONS.<sup>1</sup></p> <p><b>Decision:</b></p> <p>The ONS<sup>1</sup> data covers the period 1990 to 2017 annually, so the Moser and Power<sup>3</sup> publication is excluded as it only represented three years of data already included in the ONS.<sup>1</sup></p>                                                                                                                                                                                                           |
| ONS         | <p>ONS<sup>1</sup></p> <p><b>Study period:</b> 1990-2017</p> <p><b>Sample size:</b></p> <p><b>Outcomes:</b> Neonatal death, perinatal mortality, VLBW, LBW, birth weight &lt; 3,000 g and birthweight &gt; 4,000 g</p> <p><b>Exposures:</b> Social class/occupation</p> | <p>Spencer et al.<sup>4</sup></p> <p><b>Study period:</b> 1991-1993</p> <p><b>Sample size:</b> 208,567</p> <p><b>Outcomes:</b> LBW, birthweight under 3,000 g, birthweight over 3,500 g</p> <p><b>Exposures:</b> Social class/occupation</p> | <p><b>Issue:</b></p> <p>Birthweight reported for the years 1991-1993 in 500 g increments from &lt; 1,500 g to &gt; 3,500 g in Spencer et al.<sup>4</sup>. All years included in ONS<sup>1</sup>, with birthweight reported in 500 g increments from &lt; 1,500 g to &gt; 4,000 g enabling VLBW, LBW, birthweight &lt; 3,000 g and macrosomia to be calculated.</p> <p><b>Decision:</b></p> <p>The ONS<sup>1</sup> data covers the period 1990 to 2017 annually, so the Spencer et al.<sup>4</sup> publication is excluded as it only represented three years of data already included in the ONS<sup>1</sup>.</p> |
| ONS         | <p>ONS<sup>1</sup></p> <p><b>Study period:</b> 1990-2017</p> <p><b>Sample size:</b></p> <p><b>Outcomes:</b> Neonatal death, perinatal mortality, VLBW, LBW, birth weight &lt; 3,000 g and birthweight &gt; 4,000 g</p>                                                  | <p>Dibben et al.<sup>5</sup></p> <p><b>Study period:</b> 1996-2000</p> <p><b>Sample size:</b> 306,067</p> <p><b>Outcomes:</b> LBW, VLBW</p>                                                                                                  | <p><b>Issue:</b></p> <p>Birthweight by occupational class in Dibben et al.<sup>5</sup> is also replicated in the larger ONS<sup>1</sup> dataset.</p> <p><b>Decision:</b></p>                                                                                                                                                                                                                                                                                                                                                                                                                                      |

|                  |                                                                                                                                                                                                                                                                                                                                                                                                                                                                          |                                                                                                                                                                                                                                                                                                                                                                                                                                                                                                                                         |                                                                                                                                                                                                                                                                                                                                                                                                                                                                      |
|------------------|--------------------------------------------------------------------------------------------------------------------------------------------------------------------------------------------------------------------------------------------------------------------------------------------------------------------------------------------------------------------------------------------------------------------------------------------------------------------------|-----------------------------------------------------------------------------------------------------------------------------------------------------------------------------------------------------------------------------------------------------------------------------------------------------------------------------------------------------------------------------------------------------------------------------------------------------------------------------------------------------------------------------------------|----------------------------------------------------------------------------------------------------------------------------------------------------------------------------------------------------------------------------------------------------------------------------------------------------------------------------------------------------------------------------------------------------------------------------------------------------------------------|
|                  | <b>Exposures:</b> Social class/occupation                                                                                                                                                                                                                                                                                                                                                                                                                                | <b>Exposures:</b> Social class/occupation and household income                                                                                                                                                                                                                                                                                                                                                                                                                                                                          | The ONS <sup>1</sup> data covers the period 1990 to 2017 annually, so the Dibben et al. <sup>5</sup> data for LBW/VLBW by occupation is excluded from further analysis. Birthweight outcomes by income remain.                                                                                                                                                                                                                                                       |
| NPRS             | NPRS <sup>6</sup><br><br><b>Study period:</b> 1990-1993; 1999 – 2016<br><b>Sample size:</b> 1,355,937<br><b>Outcomes:</b> VLBW, LBW, MLBW, macrosomia, stillbirth, neonatal death and perinatal death.<br><b>Exposures:</b> Social class/occupation                                                                                                                                                                                                                      | McAvoy et al. <sup>7</sup><br><br><b>Study period:</b> NPRS (1999), ERHA (1999-2001)<br><b>Sample size:</b> 52,830 (NPRS), 63,571 (ERHA)<br><b>Outcomes:</b> LBW<br><b>Exposures:</b> Social class/occupation                                                                                                                                                                                                                                                                                                                           | <b>Issue:</b><br>The NPRS data contained in McAvoy et al. <sup>7</sup> for the year 1999, is replicated in the full NPRS dataset which comprises all the data for the period 1990-1993; 1999 – 2016.<br><br><b>Decision:</b><br>The NPRS data for 1999 reported in McAvoy et al. <sup>7</sup> is excluded from further analysis.                                                                                                                                     |
| UKCOSS           | Nair et al. <sup>8</sup><br><br><b>Study period:</b> 2005-January 2013<br><b>Sample size:</b> 1753 (cases), 3,312 (controls)<br><b>Outcomes:</b> Severe maternal morbidity (defined as defined as antenatal pulmonary embolism, eclampsia, acute fatty liver of pregnancy, amniotic fluid embolism, peripartum hysterectomy stroke in pregnancy, uterine rupture, placenta accreta, HELLP syndrome and severe sepsis).<br><b>Exposures:</b> Social class/occupation      | Knight et al. <sup>9</sup><br><br><b>Study period:</b> 2005-2006<br><b>Sample size:</b> 686 (cases), 1,227 (controls)<br><b>Outcomes:</b> Severe maternal morbidities (defined as acute fatty liver of pregnancy, amniotic fluid embolism, antenatal pulmonary embolism, eclampsia and peripartum hysterectomy).<br><b>Exposures:</b> Social class/occupation                                                                                                                                                                           | <b>Issue:</b><br>Severe maternal morbidities (defined slightly differently in each paper) in Nair et al. <sup>8</sup> and Knight et al. <sup>9</sup><br><br><b>Decision:</b><br>The Nair et al. <sup>8</sup> data is 7 years one month in length compared to the Knight et al. <sup>9</sup> data which is only a year. The Knight et al. <sup>9</sup> data will be excluded.                                                                                         |
| UKCOSS           | Nair et al. 2014 <sup>8</sup><br><br><b>Study period:</b> 2005-January 2013<br><b>Sample size:</b> 1753 (cases), 3,312 (controls)<br><b>Outcomes:</b> Severe maternal morbidity (defined as defined as antenatal pulmonary embolism, eclampsia, acute fatty liver of pregnancy, amniotic fluid embolism, peripartum hysterectomy stroke in pregnancy, uterine rupture, placenta accreta, HELLP syndrome and severe sepsis).<br><b>Exposures:</b> Social class/occupation | Lindquist et al. 2013 <sup>10</sup><br><br><b>Study period:</b> 2005-2010 (varies for each condition – some, e.g. eclampsia are just a year, whereas others such as amniotic fluid embolism are 5 years).<br><b>Sample size:</b> 1,144 (cases), 2,256 (controls)<br><b>Outcomes:</b> Severe maternal morbidities (defined as amniotic fluid embolism, acute fatty liver of pregnancy, eclampsia, peripartum hysterectomy, therapies for major peripartum haemorrhage and uterine rupture).<br><b>Exposures:</b> Social class/occupation | <b>Issue:</b><br>Severe maternal morbidities (defined differently in each paper) in Nair et al. <sup>8</sup> and Lindquist et al. 2013. <sup>10</sup><br><br><b>Decision:</b><br>The Nair et al. <sup>8</sup> data is 7 years one month in length compared to the Lindquist et al. 2013 <sup>10</sup> paper which varies in length but is typically one year for most of the conditions. Consequently the Lindquist et al. 2013 <sup>10</sup> data will be excluded. |
| Born in Bradford | Poulsen et al. 2015 <sup>11</sup><br><br><b>Study period:</b> 2007-2010<br><b>Sample size:</b> 10,850<br><b>Outcomes:</b> PTB                                                                                                                                                                                                                                                                                                                                            | Stacey et al. 2016 <sup>12</sup><br><br><b>Study period:</b> 2007-2010<br><b>Sample size:</b> 9,680<br><b>Outcomes:</b> PTB, SGA                                                                                                                                                                                                                                                                                                                                                                                                        | <b>Issue:</b><br>PTB by education is duplicated in Stacey et al. <sup>12</sup> and Poulsen et al. <sup>11</sup><br><br><b>Decision:</b>                                                                                                                                                                                                                                                                                                                              |

|          |                                                                                                                                                                                                                                                                                                                                                |                                                                                                                                                                                                                                                                                           |                                                                                                                                                                                                                                                                                                                                                                                                                                                                                                                                                                                                                                                                                    |
|----------|------------------------------------------------------------------------------------------------------------------------------------------------------------------------------------------------------------------------------------------------------------------------------------------------------------------------------------------------|-------------------------------------------------------------------------------------------------------------------------------------------------------------------------------------------------------------------------------------------------------------------------------------------|------------------------------------------------------------------------------------------------------------------------------------------------------------------------------------------------------------------------------------------------------------------------------------------------------------------------------------------------------------------------------------------------------------------------------------------------------------------------------------------------------------------------------------------------------------------------------------------------------------------------------------------------------------------------------------|
|          | <b>Exposures:</b> Education (either basic, further education or long education) <sup>1</sup>                                                                                                                                                                                                                                                   | <b>Exposures:</b> Education (as a binary variable), household measures (as binary variables related to 'not managing financially' <sup>2</sup> and 'behind with bills' <sup>3</sup> )                                                                                                     | As the Poulsen et al. <sup>11</sup> dataset is larger and has three categories of education (as opposed to two), PTB by education reported by Stacey et al. <sup>12</sup> is not analysed. The odds of PTB by other household measures are still included.                                                                                                                                                                                                                                                                                                                                                                                                                         |
| Lifeways | Niedhammer et al. <sup>13</sup><br><br><b>Study period:</b> 2001-03<br><b>Sample size:</b> 1,124<br><b>Outcomes:</b> Birthweight < 3,000 g, LBW, PTB, SGA<br><b>Exposures:</b> Educational, occupation/social class, work contract, working hours per week, shift work, physical demands, job satisfaction and job stress.                     | Murrin et al. <sup>14</sup><br><br><b>Study period:</b> 2007-2010<br><b>Sample size:</b> 1,048<br><b>Outcomes:</b> Birthweight < 3,060 g (approximately MLBW) and birthweight > 3,966 g (approximately macrosomia)<br><b>Exposures:</b> Mother's education and mother's family education. | <b>Issue:</b><br>MLBW reported by maternal education is replicated in Niedhammer et al. <sup>13</sup> and Murrin et al. <sup>14</sup><br><br><b>Decision:</b><br>As the definitions of MLBW in Murrin et al. <sup>14</sup> is only approximate, these are excluded from further analysis, and instead the Niedhammer et al. <sup>13</sup> data is used only (for education/MLBW). MLBW by education and MLBW and macrosomia for mother's family education remains in the review.                                                                                                                                                                                                   |
| Lifeways | Niedhammer et al. <sup>15</sup><br><br><b>Study period:</b> 2001-03<br><b>Sample size:</b> 1,124 (676 for education)<br><b>Outcomes:</b> Birthweight < 3,000 g, LBW, PTB, SGA<br><b>Exposures:</b> Educational, occupation/social class, work contract, working hours per week, shift work, physical demands, job satisfaction and job stress. | Niedhammer et al. <sup>13</sup><br><br><b>Study period:</b> 2001-03<br><b>Sample size:</b> 1,124 (913 for education)<br><b>Outcomes:</b> PTB<br><b>Exposures:</b> Rented home, crowded home and education                                                                                 | <b>Issue:</b><br>PTB is duplicated by education in both Niedhammer et al. <sup>15</sup> and Niedhammer et al. <sup>13</sup> . The educational categories are the same in both, however those in Niedhammer et al. <sup>13</sup> have a larger sample size for education (n=913) compared to Niedhammer et al. <sup>15</sup> (n=676). HRs are used in Niedhammer et al. <sup>13</sup> compared to ORs used in Niedhammer et al. <sup>15</sup> .<br><br><b>Decision:</b><br>As the sample size for PTB by education is larger in Niedhammer et al. <sup>13</sup> compared to Niedhammer et al. <sup>15</sup> , the ORs reported in Niedhammer et al. <sup>15</sup> will be excluded. |

## References:

- Office for National Statistics. Mortality Statistics: Childhood, infant and perinatal, England and Wales (1990 - 2007) and Child mortality (death cohort) tables in England and Wales (2008 - 2017). Newport, Wales, 1990 - 2017.
- Maier J, Macfarlane A. Trends in live births and birthweight by social class, marital status and mother's age, 1976-2000. *Health Statistics Quarterly* 2004(23):34-43.
- Moser K, Li L, Power C. Social inequalities in low birth weight in England and Wales: trends and implications for future population health. *Journal of Epidemiology & Community Health* 2003;57(9):687-91.

4. Spencer N, Bambang S, Logan S, et al. Socioeconomic status and birth weight: comparison of an area-based measure with the Registrar General's social class. *Journal of Epidemiology & Community Health* 1999;53(8):495-98.
5. Dibben C, Sigala M, Macfarlane A. Area deprivation, individual factors and low birth weight in England: is there evidence of an 'area effect'? *Journal of Epidemiology & Community Health* 2006;60(12):1053-59.
6. National Perinatal Reporting System. Perinatal Statistics. Dublin, Republic of Ireland, 1990-3, 1999-2016.
7. McAvoy H, Sturley J, Burke S, et al. Unequal at Birth: Inequalities in the occurrence of low birthweight babies in Ireland. Dublin/Belfast: Institute of Public Health in Ireland, 2006:96.
8. Nair M, Kurinczuk JJ, Knight M. Ethnic Variations in Severe Maternal Morbidity in the UK— A Case Control Study. *PLOS ONE* 2014;9(4):e95086. doi: 10.1371/journal.pone.0095086
9. Knight M, Kurinczuk JJ, Spark P, et al. Inequalities in maternal health: national cohort study of ethnic variation in severe maternal morbidities. *Bmj* 2009;338:b542.
10. Lindquist A, Knight M, Kurinczuk JJ. Variation in severe maternal morbidity according to socioeconomic position: a UK national case–control study. *BMJ Open* 2013;3(6):e002742.
11. Poulsen G, Strandberg-Larsen K, Mortensen L, et al. Exploring Educational Disparities in Risk of Preterm Delivery: A Comparative Study of 12 European Birth Cohorts. *Paediatric and Perinatal Epidemiology* 2015;29(3):172-83.
12. Stacey T, Prady S, Haith-Cooper M, et al. Ethno-Specific Risk Factors for Adverse Pregnancy Outcomes: Findings from the Born in Bradford Cohort Study. *Maternal and child health journal* 2016;20(7):1394-404.
13. Niedhammer I, Murrin C, O'Mahony D, et al. Explanations for social inequalities in preterm delivery in the prospective Lifeways cohort in the Republic of Ireland. *European Journal of Public Health* 2012;22(4):533-38. doi: <http://doi.org/10.1093/eurpub/ckr089>
14. Murrin C, Segonds-Pichon A, Fallon U, et al. Self-reported pre-pregnancy maternal body mass index and infant birth-weight. *Ir Med J* 2007;100(8):20-3.
15. Niedhammer I, O'Mahony D, Daly S, et al. Occupational predictors of pregnancy outcomes in Irish working women in the Lifeways cohort. *BJOG: An International Journal of Obstetrics & Gynaecology* 2009;116(7):943-52. doi: 10.1111/j.1471-0528.2009.02160.x

## Supplementary appendix S9: Newcastle-Ottawa quality scores for all included studies

| Case Control                                       | Number of stars awarded <sup>1</sup> |                     |                     |                     |                                  |                  |                   |                   |                          | Quality rating <sup>3</sup>                                   | Independent reviewer initials <sup>4</sup> |
|----------------------------------------------------|--------------------------------------|---------------------|---------------------|---------------------|----------------------------------|------------------|-------------------|-------------------|--------------------------|---------------------------------------------------------------|--------------------------------------------|
|                                                    | 1                                    | 2                   | 3                   | 4                   | 5                                | 6                | 7                 | 8                 | Total stars <sup>2</sup> |                                                               |                                            |
| Bush et al. (2013) <sup>1</sup>                    | b                                    | a*                  | a*                  | a*                  | c <sup>5</sup>                   | d                | a*                | a*                | 5                        | Moderate                                                      | KT & OA                                    |
| Fitzpatrick et al. (2012) <sup>2</sup>             | b                                    | a*                  | a*                  | a*                  | c <sup>5</sup>                   | c                | a*                | a*                | 5                        | Moderate                                                      | MM & OA                                    |
| Fitzpatrick et al. (2015) <sup>3</sup>             | b                                    | a*                  | a*                  | a*                  | a&b**                            | d                | a*                | a*                | 7                        | High                                                          | KT & OA                                    |
| Knight et al. (2008) <sup>4</sup>                  | b                                    | a*                  | a*                  | a*                  | a&b**                            | c                | a*                | a*                | 7                        | High                                                          | KT & OA                                    |
| Nair et al. (2014) <sup>5</sup>                    | b                                    | a*                  | a*                  | a*                  | a&b**                            | d                | a*                | a*                | 7                        | High                                                          | KT & OA                                    |
| Nair et al. (2016) <sup>6</sup>                    | b                                    | a*                  | a*                  | a*                  | a&b**                            | d                | a*                | a*                | 7                        | High                                                          | MM & KT & OA (Pilot)                       |
| Scott et al. (2012) <sup>7</sup>                   | b                                    | a*                  | a*                  | a*                  | c <sup>5</sup>                   | c                | a*                | a*                | 5                        | Moderate                                                      | KT & OA                                    |
| Tuthill et al. (1999) <sup>8</sup>                 | b                                    | a*                  | a*                  | a*                  | c <sup>5</sup>                   | d                | b                 | a*                | 4                        | Moderate                                                      | KT & OA                                    |
| Waterstone et al. (2001) <sup>9</sup>              | b                                    | a*                  | a*                  | a*                  | c <sup>5</sup>                   | d                | a*                | a*                | 5                        | Moderate                                                      | KT & OA                                    |
| Wolke et al. (2014) <sup>10</sup>                  | b                                    | a*                  | a*                  | a*                  | c                                | d                | a*                | b                 | 4                        | Moderate                                                      | KT & OA                                    |
| <b>Summary totals (out of 10 included studies)</b> | <b>n*=0 (0%)</b>                     | <b>n*=10 (100%)</b> | <b>n*=10 (100%)</b> | <b>n*=10 (100%)</b> | <b>n*=0 (0%)<br/>n**=4 (40%)</b> | <b>n*=0 (0%)</b> | <b>n*=9 (90%)</b> | <b>n*=9 (90%)</b> | <b>Range 4-7</b>         | <b>Low n=0 (0%)<br/>Moderate n=6 (60%)<br/>High n=4 (40%)</b> |                                            |

Footnote:

Case control questions: 1) Is the case definition adequate; 2) Representativeness of the cases; 3) Selection of controls; 4) Definition of controls; 5) Comparability of cases and controls on the basis of the design or analysis ; 6) Assessment of exposure; 7) Same method of ascertainment for cases and controls; 8) Non response rate

1. Newcastle-Ottawa question numbers 1-8 and associated number of stars (\*) are detailed in Supplemenatry Appendix S5.
2. Minimum number of possible stars to be awarded = 0, maximum number of possible stars to be awarded = 9.
3. Categories were allocated as: Low = 0-3 stars, Moderate = 4-6 stars, High = 7-9 stars.
4. Reviewer's initials relate to manuscript authors: KT, Katie Thomson; OA, Olawatomi Arisa; MM, Malcolm Moffat.
5. Newcastle-Ottawa score for question 4 refers to univariate analysis reported in publication (or where ORs were calculated subsequently from frequencies). Study reports multivariate analysis (with or without smoking and additional confounding variable(s)) but not for socioeconomic exposure of interest, therefore study given 0 stars for this question.

| Cohort Studies                                   | Number of stars awarded <sup>1</sup> |    |    |                |    |    |    |                          |                             | Independent reviewer initials <sup>4</sup> |
|--------------------------------------------------|--------------------------------------|----|----|----------------|----|----|----|--------------------------|-----------------------------|--------------------------------------------|
|                                                  | 1                                    | 2  | 3  | 4              | 5  | 6  | 7  | Total stars <sup>2</sup> | Quality rating <sup>3</sup> |                                            |
| Brick et al. (2016) <sup>11</sup>                | a*                                   | a* | b* | c <sup>5</sup> | b* | a* | a* | 6                        | High                        | KT & OA                                    |
| Clemens and Dibben (2016) <sup>12</sup>          | b*                                   | a* | b* | c <sup>5</sup> | b* | a* | d  | 5                        | Moderate                    | KT & OA                                    |
| Collingwood Bakeo and Clark (2006) <sup>13</sup> | a*                                   | a* | b* | b*             | b* | a* | b* | 7                        | High                        | KT & OA                                    |
| Dibben et al. (2006) <sup>14</sup>               | b*                                   | a* | b* | b*             | b* | a* | a* | 7                        | High                        | MM & OA                                    |
| Essex et al. (2013) <sup>15</sup>                | b*                                   | a* | b* | b*             | c  | a* | c  | 5                        | Moderate                    | MM & KT & OA (Pilot)                       |
| Fairley et al. (2011) <sup>16</sup>              | a*                                   | a* | b* | b*             | b* | b* | a* | 7                        | High                        | KT & OA                                    |
| Fairley and Leyland (2006) <sup>17</sup>         | a*                                   | a* | b* | c              | b* | a* | d  | 5                        | Moderate                    | KT & OA                                    |
| Gardosi et al. (2013) <sup>18</sup>              | a*                                   | a* | b* | c <sup>5</sup> | b* | a* | a* | 6                        | High                        | MM & OA                                    |
| Martinson and Reichman (2016) <sup>19</sup>      | b*                                   | a* | c  | b*             | c  | a* | c  | 4                        | Moderate                    | MM & OA                                    |
| Matijasevich et al. (2012) <sup>20</sup>         | b*                                   | a* | c  | a&b**          | b* | a* | b* | 7                        | High                        | MM & OA                                    |
| McAvoy et al. (2006) <sup>21</sup>               | d                                    | a* | d  | c              | b* | a* | d  | 3                        | Moderate                    | KT & OA                                    |
| Murrin et al. (2007) <sup>22</sup>               | a*                                   | a* | b* | c              | b* | a* | b* | 6                        | High                        | KT & OA                                    |
| NPRS <sup>23</sup>                               | a*                                   | a* | b* | c              | b* | a* | a* | 6                        | High                        | KT & OA                                    |
| National Records of Scotland <sup>24</sup>       | a*                                   | a* | b* | c              | b* | a* | a* | 6                        | High                        | KT & OA                                    |
| Niedhammer et al. (2009) <sup>25</sup>           | a*                                   | a* | c  | a&b**          | b* | a* | a* | 7                        | High                        | KT & OA                                    |
| Niedhammer et al. (2012) <sup>26</sup>           | b*                                   | a* | c  | a&b**          | b* | a* | b* | 7                        | High                        | KT & OA                                    |
| Office for National Statistics <sup>27</sup>     | a*                                   | a* | b* | c              | b* | a* | a* | 6                        | High                        | KT & OA                                    |
| Patel et al. (2005) <sup>28</sup>                | a*                                   | a* | c  | c              | b* | a* | b* | 5                        | Moderate                    | MM & OA                                    |
| Poulsen et al. (2015) <sup>29</sup>              | b*                                   | a* | c  | c              | b* | a* | b* | 5                        | Moderate                    | MM & OA                                    |
| Sheridan et al. (2013) <sup>30</sup>             | a*                                   | a* | b* | c <sup>5</sup> | b* | a* | b* | 6                        | High                        | KT & OA                                    |
| Sinnott et al. (2016) <sup>31</sup>              | a*                                   | a* | b* | c <sup>5</sup> | b* | a* | b* | 6                        | High                        | KT & OA                                    |
| Snelgrove and Murphy (2015) <sup>32</sup>        | b*                                   | a* | b* | b*             | b* | a* | b* | 7                        | High                        | KT & OA                                    |
| Stacey et al. (2016) <sup>33</sup>               | a*                                   | a* | b* | a&b**          | b* | a* | b* | 8                        | High                        | KT & OA                                    |
| Vinturache et al. (2017) <sup>34</sup>           | a*                                   | a* | b* | c <sup>5</sup> | b* | a* | b* | 6                        | High                        | KT & OA                                    |
| Wilding et al. (2019) <sup>35</sup>              | b*                                   | a* | b* | a&b**          | b* | a* | a* | 8                        | High                        | KT & OA                                    |

|                                             |                |                 |                |                                 |                |                 |                |           |                                                             |  |
|---------------------------------------------|----------------|-----------------|----------------|---------------------------------|----------------|-----------------|----------------|-----------|-------------------------------------------------------------|--|
| Summary totals (out of 25 included studies) | n*=24<br>(96%) | n*=25<br>(100%) | n*=18<br>(72%) | n*=6<br>(24%)<br>n**=5<br>(20%) | n*=23<br>(92%) | n*=25<br>(100%) | n*=20<br>(80%) | Range 3-8 | Low n=0 (0%)<br>Moderate n=7<br>(28%)<br>High n=19<br>(72%) |  |
|---------------------------------------------|----------------|-----------------|----------------|---------------------------------|----------------|-----------------|----------------|-----------|-------------------------------------------------------------|--|

Footnote:

Cohort questions: 1) Representativeness of the exposed cohort; 2) Selection of the non-exposed cohort; 3) Ascertainment of exposure; 4) Comparability of cohorts on the basis of the design or analysis; 5) Assessment of outcome; 6) Was follow-up long enough for outcomes to occur; 7) Adequacy of follow up of cohorts

1. Newcastle-Ottawa question numbers 1-8 and associated number of stars (\*) are detailed in Supplemenatry Appendix S5.
2. Minimum number of possible stars to be awarded = 0, maximum number of possible stars to be awarded = 8.
3. Categories were allocated as: Low = 0-2 stars, Moderate = 3-5 stars, High = 6-8 stars.
4. Reviewers initials relate to manuscript authors: KT, Katie Thomson; OA, Olawatomi Arisa; MM, Malcolm Moffat.
5. Newcastle-Ottawa score for question 4 refers to univariate analysis reported in publication (or where ORs were calculated subsequently from frequencies). Study reports multivariate analysis (with or without smoking and additional confounding variable(s)) but not for socioeconomic exposure of interest, therefore study given 0 stars for this question.

References:

1. Bush N, Nelson-Piercy C, Spark P, et al. Myocardial infarction in pregnancy and postpartum in the UK. *European Journal of Preventive Cardiology* 2013;20(1):12-20.

2. Fitzpatrick KE, Sellers S, Spark P, et al. Incidence and risk factors for placenta accreta/increta/percreta in the UK: a national case-control study. *PLoS One* 2012;7(12):e52893.

3. Fitzpatrick K, Tuffnell D, Kurinczuk J, et al. Incidence, risk factors, management and outcomes of amniotic-fluid embolism: a population-based cohort and nested case-control study. *BJOG: An International Journal of Obstetrics & Gynaecology* 2015;123(1):100-09.

4. Knight M, UKOSS. Antenatal pulmonary embolism: risk factors, management and outcomes. *BJOG: An International Journal of Obstetrics & Gynaecology* 2008;115(4):453-61. doi: 10.1111/j.1471-0528.2007.01622.x

5. Nair M, Kurinczuk JJ, Knight M. Ethnic variations in severe maternal morbidity in the UK- a case control study. *PLoS ONE* 2014;9(4):e95086.

6. Nair M, Knight M, Kurinczuk JJ. Risk factors and newborn outcomes associated with maternal deaths in the UK from 2009 to 2013: a national case-control study. *BJOG: An International Journal of Obstetrics & Gynaecology* 2016;123(10):1654.

7. Scott CA, Bewley S, Rudd A, et al. Incidence, risk factors, management, and outcomes of stroke in pregnancy. *Obstetrics & Gynecology* 2012;120(2 Part 1):318-24.

8. Tuthill DP, Stewart JH, Coles EC, et al. Maternal cigarette smoking and pregnancy outcome. *Paediatric and Perinatal Epidemiology* 1999;13(3):245-53.

9. Waterstone M, Bewley S, Wolfe C. Incidence and predictors of severe obstetric morbidity: case-control study. *BMJ* 2001;322(7294):1089-94.

10. Wolke D, Eryigit-Madzwamuse S, Gutbrod T. Very preterm/very low birthweight infants' attachment: Infant and maternal characteristics. *Archives of Disease in Childhood: Fetal and Neonatal Edition* 2014;99(1):F70-F75.

11. Brick A, Layte R, Nolan A, et al. Differences in nulliparous caesarean section rates across models of care: a decomposition analysis. *BMC Health Serv Res* 2016;16:239-39. doi: 10.1186/s12913-016-1494-3

12. Clemens T, Dibben C. Living in stressful neighbourhoods during pregnancy: an observational study of crime rates and birth outcomes. *European Journal of Public Health* 2017;27(2):197-202.

13. Collingwood Bakeo A, Clarke Y. Risk factors for low birthweight based on birth registration and census information, England and Wales, 1981-2000. *Health Statistics Quarterly* 2006(30):15-21.

14. Dibben C, Sigala M, Macfarlane A. Area deprivation, individual factors and low birth weight in England: is there evidence of an 'area effect'? *Journal of Epidemiology & Community Health* 2006;60(12):1053-59.
15. Essex HN, Green J, Baston H, et al. Which women are at an increased risk of a caesarean section or an instrumental vaginal birth in the UK: an exploration within the Millennium Cohort Study. *BJOG: An International Journal of Obstetrics & Gynaecology* 2013;120(6):732.
16. Fairley L, Dundas R, Leyland AH. The influence of both individual and area based socioeconomic status on temporal trends in Caesarean sections in Scotland 1980-2000. *BMC Public Health* 2011;11(1):330-30.
17. Fairley L, Leyland AH. Social class inequalities in perinatal outcomes: Scotland 1980-2000. *Journal of Epidemiology and Community Health* 2006;60(1):31-36.
18. Gardosi J, Madurasinghe V, Williams M, et al. Maternal and fetal risk factors for stillbirth: population based study. *BMJ* 2013;346:f108.
19. Martinson ML, Reichman NE. Socioeconomic Inequalities in Low Birth Weight in the United States, the United Kingdom, Canada, and Australia. *American Journal of Public Health* 2016;106(4):748-54. doi: 10.2105/AJPH.2015.303007
20. Matijasevich A, Victora CG, Lawlor DA, et al. Association of socioeconomic position with maternal pregnancy and infant health outcomes in birth cohort studies from Brazil and the UK. *Journal of Epidemiology & Community Health* 2012;66(2):127-35. doi: 10.1136/jech.2010.108605
21. McAvoy H, Sturley J, Burke S, et al. Unequal at Birth: Inequalities in the occurrence of low birthweight babies in Ireland. Dublin/Belfast: Institute of Public Health in Ireland, 2006:96.
22. Murrin C, Segonds-Pichon A, Fallon U, et al. Self-reported pre-pregnancy maternal body mass index and infant birth-weight. *Irish Medical Journal* 2007;100(8):20-3.
23. National Perinatal Reporting System. Perinatal Statistics. Dublin, Republic of Ireland, 1990-3, 1999-2016.
24. National Records of Scotland. Numbers of births, stillbirths and neonatal deaths, registered in Scotland in each year from 1990 to 2018 [bespoke request]. Edinburgh: National Records of Scotland, 2019
25. Niedhammer I, O'Mahony D, Daly S, et al. Occupational predictors of pregnancy outcomes in Irish working women in the Lifeways cohort. *BJOG: An International Journal of Obstetrics & Gynaecology* 2009;116(7):943-52.
26. Niedhammer I, Murrin C, O'Mahony D, et al. Explanations for social inequalities in preterm delivery in the prospective Lifeways cohort in the Republic of Ireland. *European Journal of Public Health* 2012;22(4):533-38.
27. Office for National Statistics. Mortality Statistics: Childhood, infant and perinatal, England and Wales (1990 - 2007) and Child mortality (death cohort) tables in England and Wales (2008 - 2017). Newport, Wales, 1990 - 2017.
28. Patel RR, Peters TJ, Murphy DJ. Prenatal risk factors for Caesarean section. Analyses of the ALSPAC cohort of 12 944 women in England. *International Journal of Epidemiology* 2005;34(2):353-67.
29. Poulsen G, Strandberg-Larsen K, Mortensen L, et al. Exploring Educational Disparities in Risk of Preterm Delivery: A Comparative Study of 12 European Birth Cohorts. *Paediatric and Perinatal Epidemiology* 2015;29(3):172-83.
30. Sheridan E, Wright J, Small N, et al. Risk factors for congenital anomaly in a multiethnic birth cohort: an analysis of the Born in Bradford study. *The Lancet* 2013;382(9901):1350.
31. Sinnott S-J, Layte R, Brick A, et al. Variation in induction of labour rates across Irish hospitals; a cross-sectional study. *The European Journal of Public Health* 2016;26(5):753-60.
32. Snelgrove JW, Murphy KE. Preterm birth and social inequality: assessing the effects of material and psychosocial disadvantage in a UK birth cohort. *Acta Obstetrica et Gynecologica Scandinavica* 2015;94(7):766-75.
33. Stacey T, Prady S, Haith-Cooper M, et al. Ethno-Specific Risk Factors for Adverse Pregnancy Outcomes: Findings from the Born in Bradford Cohort Study. *Maternal and Child Health Journal* 2016;20(7):1394-404.
34. Vinturache A, McKeating A, Daly N, et al. Maternal body mass index and the prevalence of spontaneous and elective preterm deliveries in an Irish obstetric population: a retrospective cohort study. *BMJ Open* 2017;7(10):e015258. doi: 10.1136/bmjopen-2016-015258
35. Wilding S, Ziauddeen N, Roderick P, et al. Are socioeconomic inequalities in the incidence of small-for-gestational-age birth narrowing? Findings from a population-based cohort in the South of England. *BMJ Open* 2019;9(7):e026998.

Supplementary appendix S10: Occupational classifications

Due to the changing labour market over the past 30 years for which we have collated data, occupation/social class classifications have changed in England, Wales and Scotland. To help synthesise the data, we collapsed the occupational groups which were reported to a three-class system in the UK, and a five-class system in the Republic of Ireland. For the Irish data, SEG-A (which encompassed higher and lower professionals) was used as the comparison group, intermediate occupations were SEG-B and SEG-C and all other groups were labelled ‘manual occupations and other’. For the most recent data in England and Wales, and for the ROI, we used standardised published systems to aggregate the data. However, for the Registrar General’s social class system which was in operation in England and Wales until 2001 and Scotland until 2000, we devised our own.

England, Wales and Scotland

A. Registrar General’s social class

The Registrar General social class classification was split into three classes, to attempt to align occupations in the 1990s/early 2000s to the Standard Occupational Classifications (used post 2001) which was routinely split into three classes.<sup>1</sup>

| Code  | Description                          |                                                                                                                       |
|-------|--------------------------------------|-----------------------------------------------------------------------------------------------------------------------|
| I     | Professional occupations             | Professional and managerial (used as the ‘comparison group’ in the meta-analysis)                                     |
| II    | Managerial and technical occupations |                                                                                                                       |
| IIIN  | Skilled occupations (non-manual)     | Intermediate occupations (used as the ‘exposed group’ in the meta-analysis)                                           |
| IIIM  | Skilled occupations (manual)         |                                                                                                                       |
| IV    | Partly skilled occupations           | Partly skilled/unskilled (termed ‘manual occupations and other’ and used as the ‘exposed group’ in the meta-analysis) |
| V     | Unskilled occupations                |                                                                                                                       |
| Other | Other                                |                                                                                                                       |

B. Standard Occupational Classification (National Statistics Socio-economic Classification - NS-SEC)

| Eight classes                                                                                                                                                                                                                                            | Three classes                                                                                                                  |
|----------------------------------------------------------------------------------------------------------------------------------------------------------------------------------------------------------------------------------------------------------|--------------------------------------------------------------------------------------------------------------------------------|
| 1. Higher managerial, administrative and professional occupations<br>1.1 Large employers and higher managerial and administrative occupations<br>1.2 Higher professional occupations<br>2. Lower managerial, administrative and professional occupations | 1. Higher managerial, administrative and professional occupations (used as the ‘comparison group’ in the meta-analysis)        |
| 3. Intermediate occupations                                                                                                                                                                                                                              | 2. Intermediate occupations (used as the ‘exposed group’ in the meta-analysis)                                                 |
| 4. Small employers and own account workers                                                                                                                                                                                                               |                                                                                                                                |
| 5. Large supervisory and technical occupations                                                                                                                                                                                                           |                                                                                                                                |
| 6. Semi-routine occupations                                                                                                                                                                                                                              | 3. Routine and manual occupations (termed ‘manual occupations and other’ and used as the ‘exposed group’ in the meta-analysis) |
| 7. Routine occupations                                                                                                                                                                                                                                   |                                                                                                                                |
| 8. Never worked and long-term unemployed                                                                                                                                                                                                                 | *Never worked and long-term unemployed                                                                                         |

**Ireland**

| Occupation                                                | Socio-economic group (SEG)                                                                              |
|-----------------------------------------------------------|---------------------------------------------------------------------------------------------------------|
| Farmers                                                   | Farmers (termed 'manual occupations and other' and used as the 'exposed group' in the meta-analysis)    |
| Higher professionals                                      | SEG-A (used as the 'comparison group' in the meta-analysis)                                             |
| Lower professionals                                       |                                                                                                         |
| Employers and managers                                    | SEG-B (termed 'intermediate' and used as the 'exposed group' in the meta-analysis)                      |
| Salaried employers                                        | SEG-C (termed 'intermediate' and used as the 'exposed group' in the meta-analysis)                      |
| Non-manual wage earners / Intermediate non-manual workers |                                                                                                         |
| Other non-manual workers                                  |                                                                                                         |
| Skilled manual workers                                    |                                                                                                         |
| Semi-skilled manual workers                               | SEG-D (termed 'manual occupations and other' and used as the 'exposed group' in the meta-analysis)      |
| Unskilled manual workers                                  |                                                                                                         |
| Farm labourers                                            |                                                                                                         |
| Unknown                                                   | Unknown (termed 'manual occupations and other' and used as the 'exposed group' in the meta-analysis)    |
| Unemployed                                                | Unemployed (termed 'manual occupations and other' and used as the 'exposed group' in the meta-analysis) |

**References:**

- Office for National Statistics. Standard Occupational Classification 2010: Volume 3 The National Statistics Socio-economic Classification: (Rebased on the SOC2010) User Manual. Palgrave Macmillan: Palgrave Macmillan, 2010.

## Supplementary appendix S11: Associations between socioeconomic inequalities and pregnancy outcomes

### Mortality outcomes:

Table a: Associations between occupation/social class and stillbirth.

| Study                               | Outcome                          | Sample size                              | Comparison group                       | Exposed group(s)                                                                | Result(s)                                                                                                                    |
|-------------------------------------|----------------------------------|------------------------------------------|----------------------------------------|---------------------------------------------------------------------------------|------------------------------------------------------------------------------------------------------------------------------|
| <b>No employment</b>                |                                  |                                          |                                        |                                                                                 |                                                                                                                              |
| Gardosi et al. 2013 <sup>1</sup>    | Stillbirth                       | 86,969<br>99,180                         | Mother/Father employed                 | Mother unemployed<br>Father unemployed                                          | OR 1.24 (95% CI 1.00, 1.54)*<br>OR 2.26 (95% CI 1.69, 3.02)*                                                                 |
| <b>Manual occupations and other</b> |                                  |                                          |                                        |                                                                                 |                                                                                                                              |
| ONS <sup>2</sup>                    | Stillbirth (1990-2001)           | 99,502<br>74,186                         | Professional / managerial <sup>1</sup> | Partly skilled/unskilled <sup>1</sup><br>Other <sup>1</sup>                     | OR 1.60 (95% CI 1.51, 1.70)*<br>OR 1.84 (95% CI 1.68, 2.01)*                                                                 |
| ONS <sup>2</sup>                    | Stillbirth (2002-2017)           | 7,852,069<br>5,026,761                   | Professional / managerial              | Routine and manual<br>Other                                                     | OR 1.47 (95% CI 1.44, 1.49)*<br>OR 1.95 (95% CI 1.89, 2.01)*                                                                 |
| NRS <sup>3</sup>                    | Stillbirth (1990-2000)           | 334,794<br>192,476<br>257,621            | Professional / managerial              | Partly skilled/unskilled<br>Inadequately described<br>Not stated/no information | OR 1.29 (95% CI 1.18, 1.42)*<br>OR 1.33 (95% CI 0.95, 1.86)<br>OR 1.78 (95% CI 1.61, 1.98)*                                  |
| NRS <sup>3</sup>                    | Stillbirth (2001-2018)           | 656,936<br>309,654<br>456,282            | Professional / managerial              | Routine and manual<br>Never worked/unemployed<br>Other                          | OR 1.36 (95% CI 1.27, 1.47)*<br>OR 3.13 (95% CI 2.32, 4.24)*<br>OR 1.84 (95% CI 1.69, 1.99)*                                 |
| NPRS <sup>4</sup>                   | Stillbirth (Father's occupation) | 250,297<br>211,675<br>203,888<br>511,304 | SEG-A                                  | SEG-D<br>Farmers<br>Unemployed<br>Other                                         | OR 1.33 (95% CI 1.18, 1.51)*<br>OR 1.37 (95% CI 1.19, 1.58)*<br>OR 1.97 (95% CI 1.72, 2.25)*<br>OR 1.73 (95% CI 1.58, 1.90)* |
| NPRS <sup>4</sup>                   | Stillbirth (Mother's occupation) | 278,306<br>233,449<br>279,771<br>552,884 | SEG-A                                  | SEG-D<br>Farmers<br>Unemployed<br>Other                                         | OR 1.51 (95% CI 1.31, 1.75)*<br>OR 1.88 (95% CI 0.93, 3.77)<br>OR 1.95 (95% CI 1.71, 2.22)*<br>OR 1.75 (95% CI 1.61, 1.90)*  |
| Tuthill et al. 1999 <sup>5</sup>    | Stillbirth                       | 15,711                                   | Non-manual                             | Manual                                                                          | OR 1.88 (95% CI 1.54, 2.28)*                                                                                                 |
| <b>Other non-manual occupations</b> |                                  |                                          |                                        |                                                                                 |                                                                                                                              |
| NPRS <sup>4</sup>                   | Stillbirth                       | 290,213                                  | Father: SEG-A                          | SEG-B                                                                           | OR 0.95 (95% CI 0.84, 1.08)                                                                                                  |
| NPRS <sup>4</sup>                   | Stillbirth                       | 325,729                                  | Mother: SEG-A                          | SEG-B                                                                           | OR 1.08 (95% CI 0.96, 1.23)                                                                                                  |
| <b>Intermediate occupations</b>     |                                  |                                          |                                        |                                                                                 |                                                                                                                              |
| ONS <sup>2</sup>                    | Stillbirth                       | 132,326                                  | Professional / managerial <sup>1</sup> | Intermediate 1990-2000<br>Intermediate 2002-2017                                | OR 1.32 (95% CI 1.26, 1.40)*<br>OR 1.16 (95% CI 1.14, 1.19)*                                                                 |
| NRS <sup>3</sup>                    | Stillbirth                       | 1,252,525                                | Professional / managerial              | Intermediate 1990-2000<br>Intermediate 2001-2018                                | OR 1.23 (95% CI 1.13, 1.33)*<br>OR 1.10 (95% CI 1.01, 1.20)*                                                                 |
| NPRS <sup>4</sup>                   | Stillbirth                       | 659,516                                  | Father: SEG-A                          | SEG-C                                                                           | OR 1.11 (95% CI 1.02, 1.22)*                                                                                                 |
| NPRS <sup>4</sup>                   | Stillbirth                       | 643,628                                  | Mother: SEG-A                          | SEG-C                                                                           | OR 1.17 (95% CI 1.08, 1.28)*                                                                                                 |

OR=odds ratio, CI=confidence interval, \*=significant association, SEG-A=Higher professionals/ lower professionals, SEG-B=Employers and managers/ salaried employers, SEG-C= Non-manual wage earners (or intermediate non-manual workers)/ other non-manual workers and skilled manual workers, SEG-D=Semi-skilled manual workers/ unskilled manual workers and farm labourers.

Footnote:

1. See supplementary appendix S10 for details of occupational classifications.

Table b: Associations between occupation/social class and perinatal death.

| Study                              | Outcome                     | Sample size            | Comparison group                       | Exposed group(s)                                             | Result(s)                                                    |
|------------------------------------|-----------------------------|------------------------|----------------------------------------|--------------------------------------------------------------|--------------------------------------------------------------|
| <b>Manual occupation and other</b> |                             |                        |                                        |                                                              |                                                              |
| ONS <sup>2</sup>                   | Perinatal death (1990-2001) | 99,502<br>74,186       | Professional / managerial <sup>1</sup> | Partly skilled/ unskilled <sup>1</sup><br>Other <sup>1</sup> | OR 1.65 (95% CI 1.58, 1.74)*<br>OR 1.94 (95% CI 1.80, 2.08)* |
| ONS <sup>2</sup>                   | Perinatal death (2002-2017) | 7,852,069<br>5,026,761 | Professional / managerial              | Routine and manual<br>Other                                  | OR 1.49 (95% CI 1.46, 1.51)*<br>OR 1.91 (95% CI 1.87, 1.96)* |

|                                    |                             |                                          |                                        |                                         |                                                                                                                              |
|------------------------------------|-----------------------------|------------------------------------------|----------------------------------------|-----------------------------------------|------------------------------------------------------------------------------------------------------------------------------|
| NPRS <sup>4</sup>                  | Perinatal death             | 250,297<br>211,675<br>203,888<br>511,304 | Father: SEG-A                          | SEG-D<br>Farmers<br>Unemployed<br>Other | OR 1.33 (95% CI 1.18, 1.51)*<br>OR 1.37 (95% CI 1.19, 1.58)*<br>OR 1.97 (95% CI 1.72, 2.25)*<br>OR 1.73 (95% CI 1.58, 1.90)* |
| NPRS <sup>4</sup>                  | Perinatal death             | 278,306<br>233,449<br>279,771<br>552,884 | Mother: SEG-A                          | SEG-D<br>Farmers<br>Unemployed<br>Other | OR 1.39 (95% CI 1.23, 1.57)*<br>OR 1.42 (95% CI 0.73, 2.73)<br>OR 1.85 (95% CI 1.66, 2.06)*<br>OR 1.70 (95% CI 1.59, 1.82)*  |
| Tuthill et al. 1999 <sup>5</sup>   | Perinatal death             | 15,976                                   | Mother: Non-manual                     | Manual                                  | OR 1.70 (95% CI 1.45, 1.98)*                                                                                                 |
| <b>Other non-manual occupation</b> |                             |                                          |                                        |                                         |                                                                                                                              |
| NPRS <sup>4</sup>                  | Perinatal death             | 290,213                                  | Father: SEG-A                          | SEG-B                                   | OR 1.00 (95% CI 0.91, 1.11)                                                                                                  |
| NPRS <sup>4</sup>                  | Perinatal death             | 325,729                                  | Mother: SEG-A                          | SEG-B                                   | OR 1.06 (95% CI 0.95, 1.17)                                                                                                  |
| <b>Intermediate occupations</b>    |                             |                                          |                                        |                                         |                                                                                                                              |
| ONS <sup>2</sup>                   | Perinatal death (1990-2001) | 132,326                                  | Professional / managerial <sup>1</sup> | Intermediate occupations <sup>1</sup>   | OR 1.32 (95% CI 1.26, 1.40)*                                                                                                 |
| ONS <sup>2</sup>                   | Perinatal death (2002-2017) | 6,518,061                                | Professional / managerial              | Intermediate occupations                | OR 1.18 (95% CI 1.16, 1.21)*                                                                                                 |
| NPRS <sup>4</sup>                  | Perinatal death             | 659,516                                  | Father: SEG-A                          | SEG-C                                   | OR 1.15 (95% CI 1.06, 1.24)*                                                                                                 |
| NPRS <sup>4</sup>                  | Perinatal death             | 643,628                                  | Mother: SEG-A                          | SEG-C                                   | OR 1.14 (95% CI 1.07, 1.22)*                                                                                                 |

OR=odds ratio, AOR=adjusted odds ratio, CI=confidence interval, \*=significant association, SEG-A=Higher professionals/ lower professionals, SEG-B=Employers and managers/ salaried employers, SEG-C= Non-manual wage earners (or intermediate non-manual workers)/ other non-manual workers and skilled manual workers, SEG-D=Semi-skilled manual workers/ unskilled manual workers and farm labourers.

Footnote:

1. See supplementary appendix S10 for details of occupational classifications.

Table c: Associations between occupation/social class and neonatal death.

| Study                               | Outcome                    | Sample size                   | Comparison group                                 | Exposed group(s)                                                                | Result(s)                                                                                  |
|-------------------------------------|----------------------------|-------------------------------|--------------------------------------------------|---------------------------------------------------------------------------------|--------------------------------------------------------------------------------------------|
| <b>Manual occupations and other</b> |                            |                               |                                                  |                                                                                 |                                                                                            |
| ONS <sup>2</sup>                    | Neonatal death (1990-2001) | 94,872<br>71,012              | Professional / managerial <sup>1</sup>           | Partly skilled/ unskilled <sup>1</sup><br>Other <sup>1</sup>                    | OR 1.69 (95% CI 1.57, 1.81)*<br>OR 2.17 (95% CI 1.96, 2.39)*                               |
| ONS <sup>2</sup>                    | Neonatal death (2002-2017) | 7,812,762<br>5,003,294        | Professional / managerial                        | Routine and manual<br>Other                                                     | OR 1.57 (95% CI 1.53, 1.61)*<br>OR 1.96 (95% CI 1.88, 2.04)*                               |
| NRS <sup>3</sup>                    | Neonatal death (1990-2000) | 332,895<br>191,437<br>256,027 | Professional / managerial                        | Partly skilled/unskilled<br>Inadequately described<br>Not stated/no information | OR 1.35 (95% CI 1.20, 1.52)*<br>OR 1.37 (95% CI 0.9, 2.07)<br>OR 2.96 (95% CI 2.64, 3.33)* |
| NRS <sup>3</sup>                    | Neonatal death (2001-2018) | 653,902<br>308,425<br>454,032 | Professional / managerial                        | Routine and manual<br>Never worked/unemployed<br>Other                          | OR 1.77 (95% CI 1.61, 1.95)*<br>OR 0.38 (95% CI 0.12, 1.19)<br>OR 1.07 (95% CI 0.94, 1.22) |
| Tuthill et al. 1999 <sup>5</sup>    | Neonatal death             | 15,517                        | Non-manual                                       | Manual                                                                          | OR 1.64 (95% CI 1.30, 2.08)*                                                               |
| <b>Intermediate occupations</b>     |                            |                               |                                                  |                                                                                 |                                                                                            |
| ONS <sup>2</sup>                    | Neonatal death (1990-2001) | 126,382                       | Professional / managerial <sup>1</sup>           | Intermediate occupations <sup>1</sup>                                           | OR 1.41 (95% CI 1.33, 1.50)*                                                               |
| ONS <sup>2</sup>                    | Neonatal death (2002-2017) | 6,489,542                     | Higher managerial, administrative / professional | Intermediate occupations                                                        | OR 1.25 (95% CI 1.21, 1.29)*                                                               |
| NRS <sup>3</sup>                    | Neonatal death (1990-2001) | 1,252,527                     | Professional / managerial                        | Intermediate (skilled occupations)                                              | OR 1.17 (95% CI 1.05, 1.30)*                                                               |
| NRS <sup>3</sup>                    | Neonatal death (2002-2017) | 500,726                       | Higher managerial, administrative / professional | Intermediate                                                                    | OR 1.00 (95% CI 0.89, 1.13)                                                                |

OR=odds ratio, AOR=adjusted odds ratio, CI=confidence interval, \*=significant association, SEG-A=Higher professionals/ lower professionals, SEG-B=Employers and managers/ salaried employers, SEG-C= Non-manual wage earners (or intermediate non-manual workers)/ other non-manual workers and skilled manual workers, SEG-D=Semi-skilled manual workers/ unskilled manual workers and farm labourers.

Footnote:

1. See supplementary appendix S10 for details of occupational classifications.

Table d: Associations between occupation/social class and maternal mortality.

| Study                         | Outcome        | Sample size    | Comparison group | Exposed group(s)      | Result(s)                                                                                |
|-------------------------------|----------------|----------------|------------------|-----------------------|------------------------------------------------------------------------------------------|
| Nair et al. 2016 <sup>6</sup> | Maternal death | 1,515<br>1,943 | Employed         | Unemployed<br>Missing | AOR <sup>1</sup> 1.81 (95% CI 1.08, 3.04)*<br>AOR <sup>1</sup> 0.63 (95% CI 0.40, 0.97)* |

Abbreviations: AOR=adjusted odds ratio, CI=confidence interval, \*=significant association.

Footnote:

1. Adjusted for multiple pregnancy during current pregnancy, gestational diabetes during current pregnancy, anaemia during current pregnancy, inadequate use of antenatal care, previous pregnancy problems, pre-existing medical problems, BMI, maternal age, smoking status, substance misuse and ethnicity.

Table e: Associations between occupation/social class and very low birth weight (<1,500g).

| Study                                 | Outcome                             | Sample size                           | Comparison group                                              | Exposed group(s)                                           | Result(s)                                                                                                                    |
|---------------------------------------|-------------------------------------|---------------------------------------|---------------------------------------------------------------|------------------------------------------------------------|------------------------------------------------------------------------------------------------------------------------------|
| <b>Manual occupations/ unemployed</b> |                                     |                                       |                                                               |                                                            |                                                                                                                              |
| ONS <sup>2</sup>                      | VLBW (1990-2001)                    | 928,959<br>706,743                    | Professional / managerial <sup>1</sup>                        | Partly skilled / manual <sup>1</sup><br>Other <sup>1</sup> | OR 1.36 (95% CI 1.30, 1.41)*<br>OR 1.40 (95% CI 1.31, 1.50)*                                                                 |
| ONS <sup>2</sup>                      | VLBW (2002-2017)                    | 6,526,730<br>4,209,475                | Higher managerial, administrative / professional <sup>1</sup> | Routine / manual <sup>1</sup><br>Other <sup>1</sup>        | OR 1.31 (95% CI 1.29, 1.33)*<br>OR 1.68 (95% CI 1.64, 1.72)*                                                                 |
| NPRS <sup>4</sup>                     | VLBW (Mother's occupation)          | 55,044<br>37,728<br>234,501<br>45,698 | SEG-A <sup>1</sup>                                            | SEG-D<br>Farmers<br>Other<br>Unemployed                    | OR 0.88 (95% CI 0.73, 1.04)<br>OR 0.85 (95% CI 0.27, 2.67)<br>OR 0.53 (95% CI 0.47, 0.59)*<br>OR 2.18 (95% CI 1.84, 2.58)*   |
| NPRS <sup>4</sup>                     | VLBW (Father's occupation)          | 84,369<br>40,188<br>233,062<br>41,577 | SEG-A                                                         | SEG-D<br>Farmers<br>Other<br>Unemployed                    | OR 0.47 (95% CI 0.39, 0.56)*<br>OR 1.78 (95% CI 1.42, 2.23)*<br>OR 0.75 (95% CI 0.66, 0.85)*<br>OR 2.18 (95% CI 1.79, 2.65)* |
| <b>Non-manual</b>                     |                                     |                                       |                                                               |                                                            |                                                                                                                              |
| NPRS <sup>4</sup>                     | VLBW (2000-2006 Mothers occupation) | 76,746<br>154,498                     | SEG-A                                                         | SEG-B<br>SEG-C                                             | OR 0.50 (95% CI 0.42, 0.59)*<br>OR 1.22 (95% CI 1.07, 1.38)*                                                                 |
| NPRS <sup>4</sup>                     | VLBW (2000-2006 Fathers occupation) | 70250<br>122,357                      | SEG-A                                                         | SEG-B<br>SEG-C                                             | OR 0.80 (95% CI 0.67, 0.94)*<br>OR 1.22 (95% CI 1.07, 1.38)*                                                                 |
| <b>Intermediate occupations</b>       |                                     |                                       |                                                               |                                                            |                                                                                                                              |
| ONS <sup>2</sup>                      | VLBW (1990-2001)                    | 1,380,880                             | Professional / managerial <sup>1</sup>                        | Intermediate (skilled occupations)                         | OR 1.19 (95% CI 1.15, 1.23)*                                                                                                 |
| ONS <sup>2</sup>                      | VLBW (2002-2017)                    | 5,482,688                             | Higher managerial, administrative / professional <sup>1</sup> | Intermediate occupations                                   | OR 1.19 (95% CI 1.18, 1.21)*                                                                                                 |

Abbreviations: VLBW=very low birth weight, OR=odds ratio, CI=confidence interval, SE=standard error \*=significant association, SEG-A=Higher professionals/ lower professionals, SEG-B=Employers and managers/ salaried employers, SEG-C= Non-manual wage earners (or intermediate non-manual workers)/ other non-manual workers and skilled manual workers, SEG-D=Semi-skilled manual workers/ unskilled manual workers and farm labourers.

Footnote:

1. See Supplementary appendix S10 for details of occupational classifications.

Table f: Associations between occupation/social class and low birth weight (&lt;2,500g).

| Study                                              | Outcome                      | Sample size                           | Comparison group                                 | Exposed group(s)                                                            | Result(s)                                                                                                                                                                            |
|----------------------------------------------------|------------------------------|---------------------------------------|--------------------------------------------------|-----------------------------------------------------------------------------|--------------------------------------------------------------------------------------------------------------------------------------------------------------------------------------|
| <b>Manual occupations/ unemployed</b>              |                              |                                       |                                                  |                                                                             |                                                                                                                                                                                      |
| ONS <sup>2</sup>                                   | LBW (1990-2001)              | 983,826<br>745,166                    | Professional / managerial <sup>1</sup>           | Partly skilled and manual <sup>1</sup><br>Other                             | OR 1.37 (95% CI 1.35, 1.40)*<br>OR 1.31 (95% CI 1.27, 1.34)*                                                                                                                         |
| ONS <sup>2</sup>                                   | LBW <sup>2</sup> (2002-2017) | 6,738,298<br>4,467,295                | Higher managerial, administrative / professional | Routine / manual<br>Other                                                   | OR 1.29 (95% CI 1.28, 1.30)*<br>OR 1.61 (95% CI 1.59, 1.62)*                                                                                                                         |
| NPRS <sup>4</sup>                                  | LBW                          | 56,783<br>38,690<br>244,997<br>47,120 | Mother's occupation: SEG-A                       | SEG-D<br>Farmers<br>Other<br>Unemployed                                     | OR 1.47 (95% CI 1.36, 1.60)*<br>OR 0.97 (95% CI 0.53, 1.78)<br>OR 1.47 (95% CI 1.38, 1.55)*<br>OR 2.23 (95% CI 2.03, 2.45)*                                                          |
| NPRS <sup>4</sup>                                  | LBW                          | 87,520<br>41,312<br>245,236<br>42,961 | Father's occupation: SEG-A                       | SEG-D<br>Farmers<br>Other<br>Unemployed                                     | OR 1.19 (95% CI 1.11, 1.28)*<br>OR 0.89 (95% CI 0.76, 1.03)<br>OR 1.61 (95% CI 1.52, 1.71)*<br>OR 1.78 (95% CI 1.60, 1.98)*                                                          |
| McAvoy et al. 2006 <sup>7</sup>                    | LBW <sup>3</sup> (ERHA 1999) | 4,222<br>2,949<br>5,572               | SEG-A                                            | SEG-D<br>Farmers<br>Unknown                                                 | OR 2.05 (95% CI 1.53, 2.76)*<br>OR 1.19 (95% CI 0.59, 2.40)<br>OR 2.15 (95% CI 1.66, 2.78)*                                                                                          |
| Fairley and Leyland 2006 <sup>8</sup>              | LBW (1995-2000)              | 79,077<br>62,179<br>34,138<br>60,970  | Professional (I)                                 | Skilled manual (IIIM)<br>Semi-skilled (IV)<br>Unskilled (V)<br>Undetermined | AOR <sup>4</sup> 1.81 (95% CI 1.65, 1.99)*<br>AOR <sup>4</sup> 2.17 (95% CI 1.98, 2.39)*<br>AOR <sup>4</sup> 2.07 (95% CI 1.86, 2.31)*<br>AOR <sup>4</sup> 2.70 (95% CI 2.47, 2.96)* |
| Collingwood Bakeo and Clarke 2006 <sup>9</sup>     | LBW                          | Not reported                          | Employed                                         | Unemployed<br>Inactive<br>At school/student                                 | AOR <sup>5</sup> 1.45 (95% CI 1.27, 1.67)*<br>AOR <sup>5</sup> 1.09 (95% CI 0.99, 1.20)<br>AOR <sup>5</sup> 1.22 (95% CI 1.02, 1.45)*                                                |
| <b>Non-manual</b>                                  |                              |                                       |                                                  |                                                                             |                                                                                                                                                                                      |
| NPRS <sup>4</sup>                                  | LBW                          | 79,070<br>160,040                     | Mother's occupation: SEG-A                       | SEG-B<br>SEG-C                                                              | OR 1.09 (95% CI 1.01, 1.17)*<br>OR 1.32 (95% CI 1.25, 1.40)*                                                                                                                         |
| NPRS <sup>4</sup>                                  | LBW                          | 72,334<br>126,455                     | Father's occupation: SEG-A                       | SEG-B<br>SEG-C                                                              | OR 0.94 (95% CI 0.87, 1.02)<br>OR 1.18 (95% CI 1.11, 1.26)*                                                                                                                          |
| McAvoy et al. 2006 <sup>7</sup>                    | LBW (ERHA 1999) <sup>3</sup> | 6,811<br>11,947                       | SEG-A                                            | SEG-B<br>SEG-C                                                              | OR 1.21 (95% CI 0.92, 1.57)*<br>OR 1.63 (95% CI 1.30, 2.06)*                                                                                                                         |
| <b>Intermediate occupations</b>                    |                              |                                       |                                                  |                                                                             |                                                                                                                                                                                      |
| ONS <sup>2</sup>                                   | LBW (1990-2001)              | 1,460,060                             | Professional / managerial <sup>1</sup>           | Intermediate (skilled occupations) <sup>1</sup>                             | OR 1.17 (95% CI 1.15, 1.19)*                                                                                                                                                         |
| ONS <sup>2</sup>                                   | LBW (2002-2017)              | 5,834,805                             | Higher managerial, administrative / professional | Intermediate occupations                                                    | OR 1.15 (95% CI 1.14, 1.16)*                                                                                                                                                         |
| <b>Other occupation categories/employment data</b> |                              |                                       |                                                  |                                                                             |                                                                                                                                                                                      |
| Niedhammer et al. 2009 <sup>10</sup>               | LBW                          | 663                                   | Permanent post                                   | Contract post                                                               | AOR <sup>6</sup> 1.98 (95% CI 0.37, 10.69)                                                                                                                                           |
| Niedhammer et al. 2009 <sup>10</sup>               | LBW                          | 663                                   | Working hours per week: <40                      | ≥40                                                                         | AOR <sup>6</sup> 1.80 (95% CI 0.56, 5.80)                                                                                                                                            |
| Niedhammer et al. 2009 <sup>10</sup>               | LBW                          | 662                                   | Shift work: No                                   | Yes                                                                         | AOR <sup>6</sup> 0.92 (95% CI 0.26, 3.26)                                                                                                                                            |
| Niedhammer et al. 2009 <sup>10</sup>               | LBW                          | 672                                   | Job fairly/not very/not at all physically active | Job very physically active                                                  | AOR <sup>6</sup> 4.32 (95% CI 1.24, 15.00)*                                                                                                                                          |

| Study                                | Outcome | Sample size | Comparison group | Exposed group(s) | Result(s)                                 |
|--------------------------------------|---------|-------------|------------------|------------------|-------------------------------------------|
| Niedhammer et al. 2009 <sup>10</sup> | LBW     | 673         | Job stress: Low  | High             | AOR <sup>6</sup> 0.65 (95% CI 0.23, 1.86) |

Abbreviations: ERHA=Eastern Regional Health Authority, LBW=low birth weight, OR=odds ratio, AOR=adjusted odds ratio, CI=confidence interval, SE=standard error \*=significant association, SEG-A=Higher professionals/ lower professionals, SEG-B=Employers and managers/ salaried employers, SEG-C= Non-manual wage earners (or intermediate non-manual workers)/ other non-manual workers and skilled manual workers, SEG-D=Semi-skilled manual workers/ unskilled manual workers and farm labourers.

Footnotes:

1. See supplementary appendix S10 for details of occupational classifications.
2. OR for LBW for years 2008-2017 calculated from births > 2,500 g and LBW births (i.e. non-LBW comprises weights >2,500 g).
3. OR for LBW calculated from total births and LBW births (i.e. non-LBW comprises weights >2,500 g).
4. Adjusted for marital status, maternal age, maternal height and parity.
5. Adjusted for sex of baby, mothers age, marital status at birth, economic activity, number of people in household, number of rooms, number of cars, tenure, usual residence, Carstairs quintile, long-term illness, ethnicity
6. Adjusted for age, parity, complications during pregnancy, BMI, smoking, alcohol consumption, education, marital status, planned pregnancy, region, work contract, working hrs per week, shift work, physical demands, job stress.

Table g: Associations between occupation/social class and macrosomia (>4,000g).

| Study                                          | Outcome                | Sample size                             | Comparison group                                 | Exposed group(s)                                           | Result(s)                                                                                                                    |
|------------------------------------------------|------------------------|-----------------------------------------|--------------------------------------------------|------------------------------------------------------------|------------------------------------------------------------------------------------------------------------------------------|
| <b>Manual occupations/unemployed and other</b> |                        |                                         |                                                  |                                                            |                                                                                                                              |
| ONS <sup>2</sup>                               | Macrosomia (1990-2001) | 264,801<br>193,047                      | Professional / managerial <sup>1</sup>           | Partly skilled / manual <sup>1</sup><br>Other <sup>1</sup> | OR 0.77 (95% CI 0.75, 0.79)*<br>OR 0.75 (95% CI 0.71, 0.78)*                                                                 |
| ONS <sup>2</sup>                               | Macrosomia (2002-2007) | 2,026,226<br>1,252,527                  | Higher managerial, administrative / professional | Routine and manual<br>Other                                | OR 0.80 (95% CI 0.79, 0.81)*<br>OR 0.62 (95% CI 0.61, 0.63)*                                                                 |
| NPRS <sup>4</sup>                              | Macrosomia             | 10,4696<br>50,374<br>281,303<br>51,035  | Father's occupation: SEG-A                       | SEG-D<br>Farmers<br>Other<br>Unemployed                    | OR 0.94 (95% CI 0.91, 0.97)*<br>OR 1.22 (95% CI 1.16, 1.29)*<br>OR 0.81 (95% CI 0.79, 0.83)*<br>OR 0.65 (95% CI 0.61, 0.70)* |
| NPRS <sup>4</sup>                              | Macrosomia             | 67,622<br>47,095<br>2,855,909<br>55,854 | Mother's occupation: SEG-A                       | SEG-D<br>Farmers<br>Other<br>Unemployed                    | OR 0.75 (95% CI 0.72, 0.78)*<br>OR 0.75 (95% CI 0.57, 1.00)<br>OR 0.84 (95% CI 0.82, 0.86)*<br>OR 0.49 (95% CI 0.46, 0.53)*  |
| <b>Intermediate occupations</b>                |                        |                                         |                                                  |                                                            |                                                                                                                              |
| ONS <sup>2</sup>                               | Macrosomia (1990-2001) | 365,386                                 | Professional / managerial <sup>1</sup>           | Intermediate <sup>1</sup>                                  | OR 0.87 (95% CI 0.85, 0.88)*                                                                                                 |
| ONS <sup>2</sup>                               | Macrosomia (2002-2007) | 1,641,611                               | Higher managerial, administrative / professional | Intermediate occupations                                   | OR 0.91 (95% CI 0.90, 0.91)*                                                                                                 |
| <b>Other non-manual</b>                        |                        |                                         |                                                  |                                                            |                                                                                                                              |
| NPRS <sup>4</sup>                              | Macrosomia             | 87,811<br>150,574                       | Father's occupation: SEG-A                       | SEG-B<br>SEG-C                                             | OR 1.02 (95% CI 0.99, 1.05)<br>OR 0.93 (95% CI 0.90, 0.95)*                                                                  |
| NPRS <sup>4</sup>                              | Macrosomia             | 95,663<br>188,429                       | Mother's occupation: SEG-A                       | SEG-B<br>SEG-C                                             | OR 0.96 (95% CI 0.93, 0.99)*<br>OR 0.84 (95% CI 0.82, 0.87)*                                                                 |

Abbreviations: OR=odds ratio, CI=confidence interval, SE=standard error \*=significant association, SEG-A=Higher professionals/lower professionals, SEG-B= Employees and managers/salaried employees, SEG-C= Intermediate non-manual workers/ other non-manual workers/ skilled manual workers, SEG-D= Semi-skilled manual workers/ unskilled manual workers.

Footnotes:

7. See supplementary appendix S10 for details of occupational classifications.

Table h: Associations between occupation/social class and mid-low birth weight (&lt;3,000 g).

| Study                                          | Outcome                       | Sample size                           | Comparison group                                   | Exposed group(s)                              | Result(s)                                                                                                                    |
|------------------------------------------------|-------------------------------|---------------------------------------|----------------------------------------------------|-----------------------------------------------|------------------------------------------------------------------------------------------------------------------------------|
| <b>Manual occupations/unemployed and other</b> |                               |                                       |                                                    |                                               |                                                                                                                              |
| ONS <sup>2</sup>                               | MLBW (1990-2001)              | 983,826<br>745,166                    | Professional and managerial <sup>1</sup>           | Partly skilled / manual <sup>1</sup><br>Other | OR 1.40 (95% CI 1.39, 1.42)*<br>OR 1.31 (95% CI 1.29, 1.33)*                                                                 |
| ONS <sup>2</sup>                               | MLBW (2002-2007) <sup>2</sup> | 1,741,040<br>1,178,265                | Higher managerial, administrative / professional   | Routine / manual<br>Other                     | OR 1.34 (95% CI 1.33, 1.34)*<br>OR 1.55 (95% CI 1.53, 1.57)*                                                                 |
| NPRS <sup>4</sup>                              | MLBW                          | 87,520<br>41,312<br>243,958<br>42,961 | Father's occupation:<br>SEG-A                      | SEG-D<br>Farmers<br>Other<br>Unemployed       | OR 1.18 (95% CI 1.14, 1.23)*<br>OR 0.87 (95% CI 0.80, 0.94)*<br>OR 1.43 (95% CI 1.39, 1.48)*<br>OR 1.76 (95% CI 1.66, 1.87)* |
| NPRS <sup>4</sup>                              | MLBW                          | 56,783<br>38,690<br>244,997<br>47,120 | Mother's occupation:<br>SEG-A                      | SEG-D<br>Farmers<br>Other<br>Unemployed       | OR 1.50 (95% CI 1.43, 1.57)*<br>OR 0.88 (95% CI 0.63, 1.23)<br>OR 1.43 (95% CI 1.39, 1.47)*<br>OR 2.15 (95% CI 2.03, 2.27)*  |
| <b>Intermediate occupations</b>                |                               |                                       |                                                    |                                               |                                                                                                                              |
| ONS <sup>2</sup>                               | MLBW (1990-2001)              | 1,460,060                             | Professional and managerial <sup>1</sup>           | Intermediate occupations <sup>1</sup>         | OR 1.18 (95% CI 1.17, 1.19)*                                                                                                 |
| ONS <sup>2</sup>                               | MLBW (2002-2007) <sup>2</sup> | 5,694,256                             | Higher managerial, administrative and professional | Intermediate occupations                      | OR 1.19 (95% CI 1.18, 1.20)*                                                                                                 |
| <b>Other non-manual</b>                        |                               |                                       |                                                    |                                               |                                                                                                                              |
| NPRS <sup>4</sup>                              | MLBW                          | 72,334<br>126,455                     | Father's occupation:<br>SEG-A                      | SEG-B<br>SEG-C                                | OR 1.00 (95% CI 0.96, 1.04)<br>OR 1.18 (95% CI 1.14, 1.22)*                                                                  |
| NPRS <sup>4</sup>                              | MLBW                          | 79,070<br>160,040                     | Mother's occupation:<br>SEG-A                      | SEG-B<br>SEG-C                                | OR 1.08 (95% CI 1.03, 1.12)*<br>OR 1.30 (95% CI 1.26, 1.35)*                                                                 |

Abbreviations: OR=odds ratio, AOR=adjusted odds ratio, CI=confidence interval, SE=standard error \*=significant association, MLBW=mid-low Birth weight; SEG-A=Higher professionals/lower professionals, SEG-B= Employees and managers/salaried employees, SEG-C= Intermediate non-manual workers/ other non-manual workers/ skilled manual workers, SEG-D= Semi-skilled manual workers/ unskilled manual workers.

Footnotes:

1. See supplementary appendix S10 for details of three-tier occupational classification.
2. MLBW data only available for 2002-2007, not more recently as data format reporting has changed (e.g. only reports births < 1,500 g, < 2,500 g and > 2,500 g).

Table i: Associations between occupation/social class and small for gestational age (<5<sup>th</sup> percentile and <10<sup>th</sup> percentile).

| Study                                 | Outcome                                | Sample size                          | Comparison group  | Exposed group(s)                                                            | Result(s)                                                                                                                                                                            |
|---------------------------------------|----------------------------------------|--------------------------------------|-------------------|-----------------------------------------------------------------------------|--------------------------------------------------------------------------------------------------------------------------------------------------------------------------------------|
| <b>Manual occupations/unemployed</b>  |                                        |                                      |                   |                                                                             |                                                                                                                                                                                      |
| Fairley and Leyland 2006 <sup>8</sup> | SGA (<5 <sup>th</sup> ) (1990-1994)    | 84,733<br>70,955<br>43,553<br>48,682 | Professional (I)  | Skilled manual (IIIM)<br>Semi-skilled (IV)<br>Unskilled (V)<br>Undetermined | AOR <sup>1</sup> 1.95 (95% CI 1.76, 2.15)*<br>AOR <sup>1</sup> 2.34 (95% CI 2.11, 2.58)*<br>AOR <sup>1</sup> 2.53 (95% CI 2.28, 2.82)*<br>AOR <sup>1</sup> 2.69 (95% CI 2.43, 2.99)* |
| Fairley and Leyland 2006 <sup>8</sup> | SGA (<5 <sup>th</sup> ) (1995-2000)    | 79,077<br>62,179<br>34,138<br>60,970 | Professional (I)  | Skilled manual (IIIM)<br>Semi-skilled (IV)<br>Unskilled (V)<br>Undetermined | AOR <sup>1</sup> 1.93 (95% CI 1.75, 2.14)*<br>AOR <sup>1</sup> 2.42 (95% CI 2.18, 2.68)*<br>AOR <sup>1</sup> 2.28 (95% CI 2.03, 2.57)*<br>AOR <sup>1</sup> 2.71 (95% CI 2.44, 3.00)* |
| Wilding et al. 2019 <sup>11</sup>     | SGA (<10 <sup>th</sup> )               | 65,417                               | Maternal employed | Unemployed                                                                  | AOR <sup>2</sup> 1.27 (95% CI 1.16, 1.38)*                                                                                                                                           |
| Wilding et al. 2019 <sup>11</sup>     | SGA (<10 <sup>th</sup> ), primiparous) | Not reported                         | Maternal employed | Unemployed                                                                  | AOR <sup>2</sup> 1.29 (95% CI 1.13, 1.46)*                                                                                                                                           |
| Wilding et al. 2019 <sup>11</sup>     | SGA (<10 <sup>th</sup> ), multiparous) | Not reported                         | Maternal employed | Unemployed                                                                  | AOR <sup>2</sup> 1.17 (95% CI 0.99, 1.38)                                                                                                                                            |
| Wilding et al. 2019 <sup>11</sup>     | SGA (<10 <sup>th</sup> ), all parity   | 61,576                               | Partner employed  | Unemployed                                                                  | AOR <sup>2</sup> 1.27 (95% CI 1.13, 1.43)*                                                                                                                                           |

|                                                    |                                        |                          |                                   |                                                                                                       |                                                                                                                          |
|----------------------------------------------------|----------------------------------------|--------------------------|-----------------------------------|-------------------------------------------------------------------------------------------------------|--------------------------------------------------------------------------------------------------------------------------|
| Wilding et al. 2019 <sup>11</sup>                  | SGA (<10 <sup>th</sup> ), primiparous) | Not reported             | Partner employed                  | Unemployed                                                                                            | AOR <sup>2</sup> 1.33 (95% CI 1.12, 1.58)*                                                                               |
| Wilding et al. 2019 <sup>11</sup>                  | SGA (<10 <sup>th</sup> ), multiparous) | Not reported             | Partner employed                  | Unemployed                                                                                            | AOR <sup>2</sup> 1.17 (95% CI 0.99, 1.38)                                                                                |
| <b>Non-manual occupations</b>                      |                                        |                          |                                   |                                                                                                       |                                                                                                                          |
| Niedhammer et al. 2009 <sup>10</sup>               | SGA (<10 <sup>th</sup> )               | 346<br>265<br>271<br>206 | Managers, professionals           | Technicians, ass. prof<br>Clerical support workers<br>Service and sale workers<br>Blue collar workers | OR 1.82 (95% CI 0.69, 4.82)<br>OR 1.82 (95% CI 0.63, 5.26)<br>OR 0.93 (95% CI 0.28, 3.12)<br>OR 1.14 (95% CI 0.28, 4.72) |
| Fairley and Leyland 2006 <sup>8</sup>              | SGA (<5 <sup>th</sup> ) (1990-1994)    | 72,500<br>57,009         | Professional (I)                  | Managerial/technical (II)<br>Skilled non-manual (IIINM)                                               | AOR <sup>1</sup> 1.41 (95% CI 1.27, 1.56)*<br>AOR <sup>1</sup> 2.03 (95% CI 1.83, 2.25)*                                 |
| Fairley and Leyland 2006 <sup>8</sup>              | SGA (<5 <sup>th</sup> ) (1995-2000)    | 79,448<br>62,064         | Professional (I)                  | Managerial/technical (II)<br>Skilled non-manual (IIINM)                                               | AOR <sup>1</sup> 1.35 (95% CI 1.21, 1.50)*<br>AOR <sup>1</sup> 1.94 (95% CI 1.74, 2.15)*                                 |
| <b>Other occupation categories/employment data</b> |                                        |                          |                                   |                                                                                                       |                                                                                                                          |
| Niedhammer et al. 2009 <sup>10</sup>               | SGA (<10 <sup>th</sup> )               | 663                      | Permanent post                    | Contract post                                                                                         | AOR <sup>3</sup> 0.52 (95% CI 0.11, 2.45)                                                                                |
| Niedhammer et al. 2009 <sup>10</sup>               | SGA (<10 <sup>th</sup> )               | 663                      | Working hours per week: <40       | ≥40                                                                                                   | AOR <sup>3</sup> 1.42 (95% CI 0.58, 3.51)                                                                                |
| Niedhammer et al. 2009 <sup>10</sup>               | SGA (<10 <sup>th</sup> )               | 662                      | Shift work: No                    | Yes                                                                                                   | AOR <sup>3</sup> 1.32 (95% CI 0.50, 3.46)                                                                                |
| Niedhammer et al. 2009 <sup>10</sup>               | SGA (<10 <sup>th</sup> )               | 672                      | Fairly/not very/not at all active | Job very physically active                                                                            | AOR <sup>3</sup> 1.44 (95% CI 0.53, 3.86)                                                                                |
| Niedhammer et al. 2009 <sup>10</sup>               | SGA (<10 <sup>th</sup> )               | 673                      | Job stress: Low                   | High                                                                                                  | AOR <sup>3</sup> 0.60 (95% CI 0.26, 1.37)                                                                                |

Abbreviations: ass. prof. = associate professionals, SGA=small for gestational age, OR=odds ratio, AOR=adjusted odds ratio, CI=confidence interval, SE=standard error \*=significant association

Footnotes:

1. Adjusted for marital status, maternal age, maternal height and parity.
2. Adjusted for maternal age, ethnicity, gestational diabetes and systolic blood pressure, the other two socioeconomic status indicators, maternal body mass index as a potential mediator, maternal smoking history and parity.
3. Adjusted for age, parity, complications during pregnancy, BMI, smoking, alcohol consumption, education, marital status, planned pregnancy, region, work contract, working hrs per week, shift work, physical demands and job stress.

**Table j: Associations between education and birth weight outcomes.**

| Study                                   | Outcome               | Sample size              | Comparison group                                             | Exposed group(s)                                                                                                                                                     | Result(s)                                                                                                                             |
|-----------------------------------------|-----------------------|--------------------------|--------------------------------------------------------------|----------------------------------------------------------------------------------------------------------------------------------------------------------------------|---------------------------------------------------------------------------------------------------------------------------------------|
| Niedhammer et al. 2009 <sup>10</sup>    | LBW                   | 461<br>606               | Higher than secondary                                        | Lower than secondary<br>Complete secondary                                                                                                                           | AOR <sup>1</sup> 0.35 (95% CI 0.03, 4.04)<br>AOR <sup>1</sup> 0.94 (95% CI 0.30, 2.88)                                                |
| Martinson & Reichman 2016 <sup>12</sup> | LBW                   | 5,864<br>8,280<br>4,807  | ≥ bachelor's degree                                          | Some college/equivalent<br>High school/equivalent<br><high school/equivalent                                                                                         | AOR <sup>2</sup> 1.20 (95% CI 0.91, 1.58)<br>AOR <sup>2</sup> 1.42 (95% CI 1.11, 1.83)*<br>AOR <sup>2</sup> 2.42 (95% CI 1.78, 3.30)* |
| Niedhammer et al. 2009 <sup>10</sup>    | MLBW                  | 461<br>606               | Higher than secondary                                        | Lower than secondary<br>Complete secondary                                                                                                                           | AOR <sup>1</sup> 0.90 (95% CI 0.36, 2.25)<br>AOR <sup>1</sup> 0.94 (95% CI 0.53, 1.68)                                                |
| Murrin et al. 2007 <sup>13</sup>        | MLBW (<3,060g)        | 264<br>237<br>158<br>111 | Two grandparents complete 3 <sup>rd</sup> level <sup>3</sup> | No school/1 <sup>st</sup> level only<br>Some 2 <sup>nd</sup> level school<br>Complete 2 <sup>nd</sup> level school<br>One grandparent complete 3 <sup>rd</sup> level | OR 1.01 (95% CI 0.39, 2.62)<br>OR 1.21 (95% CI 0.47, 3.15)<br>OR 1.21 (95% CI 0.45, 3.25)<br>OR 1.00 (95% CI 0.35, 2.85)              |
| Murrin et al. 2007 <sup>13</sup>        | Macrosomia (>3,966 g) | 417<br>545<br>682        | Mother's education: Complete 3 <sup>rd</sup> level           | No school<br>Some 2 <sup>nd</sup> level school<br>Complete 2 <sup>nd</sup> level school                                                                              | OR 18.56 (95% CI 8.41, 41.05)*<br>OR 3.40 (95% CI 2.24, 5.16)*<br>OR 2.83 (95% CI 1.96, 4.07)*                                        |
| Murrin et al. 2007 <sup>13</sup>        | Macrosomia (>3,966 g) | 276<br>236<br>171<br>113 | Two grandparents complete 3 <sup>rd</sup> level              | No school/1 <sup>st</sup> level only<br>Some 2 <sup>nd</sup> level school<br>Complete 2 <sup>nd</sup> level school<br>One grandparent complete 3 <sup>rd</sup> level | OR 0.91 (95% CI 0.39, 2.15)<br>OR 0.86 (95% CI 0.36, 2.04)<br>OR 1.23 (95% CI 0.51, 2.98)<br>OR 0.75 (95% CI 0.29, 1.97)              |

|                                        |                      |                  |                                 |                                            |                                                                                          |
|----------------------------------------|----------------------|------------------|---------------------------------|--------------------------------------------|------------------------------------------------------------------------------------------|
| Wolke et al. 2014 <sup>14</sup>        | VLBW/VPTB            | 185<br>69        | >10 years                       | 10 years<br><10 years                      | OR 1.05 (95% CI 0.05, 3.14)<br>OR 1.54 (95% CI 1.01, 2.35)                               |
| Niedhammer et al. 2009 <sup>10</sup>   | SGA                  | 461<br>606       | Higher than<br>secondary        | Lower than secondary<br>Complete secondary | AOR <sup>1</sup> 1.04 (95% CI 0.28, 3.84)<br>AOR <sup>1</sup> 0.74 (95% CI 0.30, 1.84)   |
| Wilding et al. 2019 <sup>11</sup>      | SGA<br>(all parity)  | 45,457<br>39,455 | University<br>degree/<br>higher | College<br>Secondary school/lower          | AOR <sup>4</sup> 1.11 (95% CI 1.00, 1.22)*<br>AOR <sup>4</sup> 1.31 (95% CI 1.17, 1.47)* |
| Wilding et al. 2019 <sup>11</sup>      | SGA<br>(primiparous) | Not<br>reported  | University<br>degree/<br>higher | College<br>Secondary school/lower          | AOR <sup>4</sup> 1.09 (95% CI 0.97, 1.24)<br>AOR <sup>4</sup> 1.28 (95% CI 1.12, 1.47)*  |
| Wilding et al. 2019 <sup>11</sup>      | SGA<br>(multiparous) | Not<br>reported  | University<br>degree/<br>higher | College<br>Secondary school/lower          | AOR <sup>4</sup> 1.19 (95% CI 0.93, 1.50)<br>AOR <sup>4</sup> 1.40 (95% CI 1.10, 1.77)*  |
| Stacey et al. 2016 <sup>15</sup>       | SGA                  | 9,658            | Higher<br>education             | Less education <sup>5</sup>                | AOR <sup>6</sup> 1.06 (95% CI 0.94, 1.20)                                                |
| Matijasevich et al. 2012 <sup>16</sup> | IUGR                 | 6,737            | A-level/<br>degree              | CSE/none                                   | AOR <sup>6</sup> 1.8 (95% CI 1.3, 2.6)*                                                  |

Abbreviations: OR=odds ratio, AOR=adjusted odds ratio, CI=confidence interval, \*=significant association, LBW=low birth weight, VLBW=very low birth weight, VPTB=very preterm birth, IUGR=intrauterine growth restriction, MLBW=mid-low birth weight, SGA=small for gestational age.

Footnotes:

- Adjusted for age, parity, complications during pregnancy, BMI, smoking, alcohol consumption, education, marital status, planned pregnancy, region, work contract, working hrs per week, shift work, physical demands, job stress.
- Adjusted for parity, child sex, maternal nativity, marital status and maternal age at birth.
- The Irish educational system comprises three levels – primary, up to the age of 12; secondary from aged 12 years until the students complete a Leaving Certificate, and third level which is either university, the technological sector and the colleges of education.
- Adjusted for maternal age, ethnicity, gestational diabetes and systolic blood pressure, the other two socioeconomic status indicators, maternal body mass index as a potential mediator, maternal smoking history and parity.
- Education was reported as a binary indicator comparing those with fewer than five GCSEs (General Certificate of Secondary Education), unknown, or equivalent that could not be classified, with those who achieved five GCSEs or higher.
- Adjusted for age, parity, BMI, ethnicity, migration history, health behaviours (smoking in pregnancy, alcohol in pregnancy), psycho-social factors (not married, more deprived Index of Multiple Deprivation, less education, at risk for distress, at risk of hopelessness, not managing financially, behind with bills) and medical conditions (diabetes and hypertension).
- Adjusted for pre-pregnancy BMI, ethnic origin, maternal age, marital status, parity, urinary tract infections, hypertension, hospital admission during pregnancy, ever smoked during pregnancy and maternal education.

Table k: Associations between income/finances and birth weight outcomes.

| Study                                     | Outcome   | Sample size  | Comparison group                    | Exposed group(s)                                                                         | Result(s)                                                                                                                                                                                                          |
|-------------------------------------------|-----------|--------------|-------------------------------------|------------------------------------------------------------------------------------------|--------------------------------------------------------------------------------------------------------------------------------------------------------------------------------------------------------------------|
| Martinson and Reichman 2016 <sup>12</sup> | LBW       | Not reported | Income: Top quintile (highest)      | Fourth quintile<br>Middle quintile<br>Second quintile<br>Bottom quintile (lowest)        | AOR <sup>1</sup> 1.07 (95% CI 0.80, 1.42)<br>AOR 1.40 (95% CI 1.07, 1.84)*<br>AOR 1.42 (95% CI 1.04, 1.93)*<br>AOR 1.78 (95% CI 1.30, 2.44)*                                                                       |
| Dibben et al. 2006 <sup>17</sup>          | LBW       | Not reported | Household income: <£18,000 (lowest) | £18-19,000<br>£20-24,000<br>£25-29,000<br>£30-34,000<br>£35-39,000<br>≥£40,000 (highest) | AOR <sup>2</sup> 1.01 (SE 0.1)<br>AOR <sup>2</sup> 0.87 (SE 0.08)*<br>AOR <sup>2</sup> 0.83 (SE 0.07)*<br>AOR <sup>2</sup> 0.81 (SE 0.07)*<br>AOR <sup>2</sup> 0.79 (SE 0.07)*<br>AOR <sup>2</sup> 0.79 (SE 0.08)* |
| Wolke et al. 2014 <sup>14</sup>           | VLBW/VPTB | 105<br>132   | Income: >£40,000                    | £25,001-£40k<br>£0-£25k                                                                  | OR 1.56 (95% CI 0.70, 3.47)<br>OR 1.78 (95% CI 0.88, 3.62)                                                                                                                                                         |
| Matijasevich et al. 2012 <sup>16</sup>    | IUGR      | 3,453        | Income: 5th quintile (highest)      | Income: 1st quintile (lowest)                                                            | AOR <sup>3</sup> 1.2 (95% CI 0.8, 1.7)                                                                                                                                                                             |
| Stacey et al. 2016 <sup>15</sup>          | SGA       | 9,622        | Managing financially <sup>4</sup>   | Not managing financially <sup>4</sup>                                                    | AOR <sup>5</sup> 1.12 (95% CI 0.91, 1.38)                                                                                                                                                                          |
| Stacey et al. 2016 <sup>15</sup>          | SGA       | 9,381        | Not behind with bills               | Behind with bills <sup>6</sup>                                                           | AOR <sup>5</sup> 1.07 (95% CI 0.89, 1.29)                                                                                                                                                                          |

Abbreviations: LBW=low birth weight, VLBW=very low birth weight, VPTB=very preterm birth, IUGR=intrauterine growth restriction, SGA=small for gestational age, OR=odds ratio, AOR=adjusted odds ratio, CI=confidence interval, \*=significant association

Footnotes:

1. Adjusted for parity, child sex, maternal nativity, marital status and maternal age at birth.
2. Adjusted for mother's age, parents' social class, registration status and SOA level income deprivation.
3. Adjusted for pre-pregnancy BMI, ethnic origin, maternal age, marital status, parity, UTI, hypertension, hospital admission during pregnancy, ever smoked during pregnancy and maternal education.
4. Women were asked 'How well would you say you or you and your husband/partner are managing financially' Respondents were classed as either financially secure (if they reported they were 'living comfortably', 'doing alright' or 'just getting by' and struggling financially if they responded 'finding it quite difficult' or 'very difficult'.
5. Adjusted for age, parity, BMI, ethnicity, migration history, health behaviours (smoking in pregnancy, alcohol in pregnancy), psycho-social factors (not married, more deprived Index of Multiple Deprivation, less education, at risk for distress, at risk of hopelessness, not managing financially, behind with bills) and medical conditions (diabetes and hypertension).
6. Women were asked whether they were 'behind with bills' as a binary indicator (yes, no). No other details were provided.

Table l: Associations between housing and low birth weight (<2500g).

| Study                                                | Outcome | Sample size  | Comparison group        | Exposed group(s)                      | Result(s)                                                                               |
|------------------------------------------------------|---------|--------------|-------------------------|---------------------------------------|-----------------------------------------------------------------------------------------|
| Collingwood<br>Bakeo and Clarke<br>2006 <sup>9</sup> | LBW     | Not reported | 3/4 people in household | 1 or 2 people<br>≥5 people            | AOR <sup>1</sup> 1.02 (95% CI 0.94, 1.11)<br>AOR <sup>1</sup> 1.35 (95% CI 1.23, 1.49)* |
| Collingwood<br>Bakeo and Clarke<br>2006 <sup>9</sup> | LBW     | Not reported | 5 or more rooms         | 1 or 2 rooms<br>3 or 4 rooms          | AOR <sup>1</sup> 1.04 (95% CI 0.85, 1.28)<br>AOR <sup>1</sup> 0.97 (95% CI 0.89, 1.06)  |
| Collingwood<br>Bakeo and Clarke<br>2006 <sup>9</sup> | LBW     | Not reported | Owner                   | Council/housing ass.<br>Renting other | AOR <sup>1</sup> 1.60 (95% CI 1.48, 1.78)*<br>AOR <sup>1</sup> 1.08 (95% CI 0.95, 1.23) |

Abbreviations: AOR=adjusted odds ratio, CI=confidence interval, \*=significant association, LBW=low birth weight.

Footnotes:

1. Adjusted for sex of baby, mother's age, marital status at birth, economic activity, number of people in household, number of rooms, number of cars, tenure, usual residence, Carstairs quintile, long-term illness and ethnicity.

Table m: Associations between car ownership and low birth weight (<2500g).

| Study                                                | Outcome | Sample size  | Comparison on group | Exposed group(s)           | Result(s)                                                                                |
|------------------------------------------------------|---------|--------------|---------------------|----------------------------|------------------------------------------------------------------------------------------|
| Collingwood<br>Bakeo and Clarke<br>2006 <sup>9</sup> | LBW     | Not reported | 1 car               | No cars<br>More than 1 car | AOR <sup>1</sup> 1.44 (95% CI 1.32, 1.57)*<br>AOR <sup>1</sup> 0.84 (95% CI 0.77, 0.92)* |

Abbreviations: LBW=low birth weight, AOR=adjusted odds ratio, CI=confidence interval, \*=significant association

Footnotes:

1. Adjusted for sex of baby, mother's age, marital status at birth, economic activity, number of people in household, number of rooms, number of cars, tenure, usual residence, Carstairs quintile, long-term illness and ethnicity.

Table n: Associations between occupation/social class and preterm birth (<37 weeks).

| Study                                  | Outcome                                | Sample size                                              | Comparison group | Exposed group(s)                                                                                          | Result(s)                                                                                                                                                                                                                                                                        |
|----------------------------------------|----------------------------------------|----------------------------------------------------------|------------------|-----------------------------------------------------------------------------------------------------------|----------------------------------------------------------------------------------------------------------------------------------------------------------------------------------------------------------------------------------------------------------------------------------|
| Fairley & Leyland<br>2006 <sup>8</sup> | Preterm (births between 1990 and 1994) | 72,500<br>57,009<br>84,733<br>70,955<br>43,553<br>48,682 | Professional     | Managerial/technical<br>Skilled non-manual<br>Skilled manual<br>Semi-skilled<br>Unskilled<br>Undetermined | AOR <sup>1</sup> 1.12 (95% CI 1.03, 1.21)*<br>AOR <sup>1</sup> 1.40 (95% CI 1.29, 1.53)*<br>AOR <sup>1</sup> 1.32 (95% CI 1.22, 1.44)*<br>AOR <sup>1</sup> 1.40 (95% CI 1.29, 1.52)*<br>AOR <sup>1</sup> 1.43 (95% CI 1.30, 1.56)*<br>AOR <sup>1</sup> 1.70 (95% CI 1.56, 1.85)* |
| Fairley & Leyland<br>2006 <sup>8</sup> | Preterm (births between 1995 and 2000) | 79,448<br>62,064<br>79,077<br>62,179<br>34,138<br>60,970 | Professional     | Managerial/technical<br>Skilled non-manual<br>Skilled manual<br>Semi-skilled<br>Unskilled<br>Undetermined | AOR <sup>1</sup> 1.21 (95% CI 1.11, 1.32)*<br>AOR <sup>1</sup> 1.47 (95% CI 1.35, 1.60)*<br>AOR <sup>1</sup> 1.46 (95% CI 1.34, 1.58)*<br>AOR <sup>1</sup> 1.60 (95% CI 1.47, 1.74)*<br>AOR <sup>1</sup> 1.56 (95% CI 1.41, 1.73)*<br>AOR <sup>1</sup> 1.90 (95% CI 1.75, 2.07)* |

|                                       |                                    |                                                    |              |                                                                                                               |                                                                                                                                                                                            |
|---------------------------------------|------------------------------------|----------------------------------------------------|--------------|---------------------------------------------------------------------------------------------------------------|--------------------------------------------------------------------------------------------------------------------------------------------------------------------------------------------|
| Clemens & Dibben 2017 <sup>18</sup>   | Preterm                            | 7,062<br>8,942<br>2,933<br>4,712<br>1,965<br>2,362 | Professional | Managerial and technical<br>Skilled non-manual<br>Skilled manual<br>Partly skilled<br>Unskilled<br>Unemployed | OR 1.19 (95% CI 0.84, 1.70)<br>OR 1.47 (95% CI 1.04, 2.06)*<br>OR 1.41 (95% CI 0.96, 2.08)<br>OR 1.74 (95% CI 1.22, 2.48)*<br>OR 1.60 (95% CI 1.05, 2.43)*<br>OR 1.71 (95% CI 1.15, 2.53)* |
| Vinturache et al. 2017 <sup>19</sup>  | Preterm<br>Spontaneous<br>Elective | 39,283<br>38,033<br>38,238                         | Employed     | Unemployed                                                                                                    | OR 1.4 (95% CI 1.2, 1.5)*<br>OR 1.57 (95% CI 1.34, 1.83)*<br>OR 1.26 (95% CI 1.08, 1.47)*                                                                                                  |
| Snelgrove & Murphy 2015 <sup>20</sup> | Preterm                            | 17,285                                             | Employed     | Unemployed                                                                                                    | AOR <sup>2</sup> 1.52 (95% CI 1.21, 1.90)*                                                                                                                                                 |

Abbreviations: OR=odds ratio, AOR=adjusted odds ratio, CI=confidence interval, \*=significant association

Footnotes:

- Adjusted for marital status, maternal age, maternal height, parity.
- Adjusted for maternal age, parity, income, housing tenure, education, household employment, no contact with friends, family would not help financially, no other parents to talk to, marital status, ethnicity, self-rated health, smoking, alcohol, fetal sex, feeling toward pregnancy, antenatal care, delivery place, mode of delivery, induced labour, pregnancy complications (preeclampsia, preterm premature rupture of membranes, antepartum haemorrhage, placental disorder, amniotic fluid disorder, diabetes, genitourinary infection, maternal condition, intrauterine growth restriction, congenital anomaly).

Table o: Associations between education and preterm birth (<37 weeks).

| Study                                  | Outcome | Sample size                                                      | Comparison group                        | Exposed group(s)                                                                                                                           | Result(s)                                                                                                                                                                                                                 |
|----------------------------------------|---------|------------------------------------------------------------------|-----------------------------------------|--------------------------------------------------------------------------------------------------------------------------------------------|---------------------------------------------------------------------------------------------------------------------------------------------------------------------------------------------------------------------------|
| Snelgrove & Murphy 2015 <sup>20</sup>  | Preterm | 11,665<br>7,746<br>3,052                                         | Below secondary <sup>1</sup>            | Secondary<br>Post-secondary<br>Overseas                                                                                                    | AOR <sup>2</sup> 1.04 (95% CI 0.87, 1.25)<br>AOR <sup>2</sup> 1.07 (95% CI 0.85, 1.34)<br>AOR <sup>2</sup> 0.66 (95% CI 0.41, 1.04)                                                                                       |
| Poulsen et al. 2015 <sup>21</sup>      | Preterm | Not reported                                                     | Long education <sup>3</sup>             | Basic education <sup>3</sup><br>Further education <sup>3</sup>                                                                             | RR 1.0 (95% CI 0.8, 1.2)<br>RR 1.1 (95% CI 0.8, 1.4)                                                                                                                                                                      |
| Matijasevich et al. 2012 <sup>16</sup> | Preterm | 6737                                                             | A-level/degree                          | CSE/none                                                                                                                                   | AOR <sup>4</sup> 0.9 (95% CI 0.5, 1.7)                                                                                                                                                                                    |
| Niedhammer et al. 2012 <sup>22</sup>   | Preterm | 913 <sup>5</sup>                                                 | Higher than secondary                   | Complete secondary<br>Lower secondary                                                                                                      | AHR <sup>6</sup> 0.78 (95% CI 0.36, 1.68)<br>AHR <sup>6</sup> 2.14 (95% CI 1.05, 4.38)*                                                                                                                                   |
| Clemens & Dibben 2016 <sup>18</sup>    | Preterm | 12,910<br>16,833<br>10,113<br>15,275<br>8,872<br>9,892<br>10,176 | Professional qualification / equivalent | None<br>O' grade/Standard Grade<br>Higher, 'A' level<br>GSVQ/SVQ Level 1/2<br>GSVQ/SVQ Level 3<br>HNC/HND/SVQ 4/5<br>First / higher degree | OR 1.60 (95% CI 1.29, 1.98)*<br>OR 1.41 (95% CI 1.16, 1.72)*<br>OR 1.28 (95% CI 0.98, 1.67)<br>OR 1.27 (95% CI 1.03, 1.57)*<br>OR 1.24 (95% CI 0.91, 1.69)<br>OR 0.98 (95% CI 1.75, 1.27)*<br>OR 0.93 (95% CI 0.69, 1.24) |

Abbreviations: OR=odds ratio, AOR=adjusted odds ratio, AHR=adjusted hazard ratio, CI=confidence interval, \*=significant association, CSE=Certificate of Secondary Education, O' grade=Ordinary-grade; A level=Advance Level; GSVQ=General Scottish Vocational Qualification, SVQ=Scottish Vocational Qualification, HNC=Higher National Certificate, HND=Higher National Diploma.

Footnotes:

- Note: lowest education (below secondary) used as the comparison group.
- Adjusted for maternal age, parity, income, housing tenure, education, household employment, no contact with friends, family would not help financially, no other parents to talk to, marital status, ethnicity, self-rated health, smoking, alcohol, fetal sex, feeling toward pregnancy, antenatal care, delivery place, mode of delivery, induced labour, pregnancy complications (preeclampsia, preterm premature rupture of membranes, antepartum haemorrhage, placental disorder, amniotic fluid disorder, diabetes, genitourinary infection, maternal condition, intrauterine growth restriction, congenital anomaly).
- Education reported as either basic (completed mandatory schooling or less), further education (corresponding to less than a university degree), or long education (corresponding to having at least a bachelor degree).
- Adjusted for pre-pregnancy BMI, ethnic origin, maternal age, marital status, parity, urinary infection, hypertension, hospital admission during pregnancy, ever smoked during pregnancy, caesarean section, delivery assisted by a doctor, IUGR and socioeconomic position.
- Sample size not split between comparison/ exposed groups in publication.
- Adjusted for maternal age and parity.

Table p: Associations between income/finances and preterm birth (&lt;37 weeks).

| Study                                  | Outcome | Sample size                      | Comparison group            | Exposed group(s)                      | Result(s)                                                                                                                                                                         |
|----------------------------------------|---------|----------------------------------|-----------------------------|---------------------------------------|-----------------------------------------------------------------------------------------------------------------------------------------------------------------------------------|
| Snelgrove & Murphy <sup>20</sup>       | Preterm | 7,997<br>7,465<br>7,261<br>7,015 | 1st-low income <sup>1</sup> | 2nd<br>3rd<br>4th<br>5th-high income  | AOR <sup>2</sup> 1.12 (95% CI 0.90, 1.38)<br>AOR <sup>2</sup> 1.37 (95% CI 1.06, 1.77)*<br>AOR <sup>2</sup> 0.99 (95% CI 0.75, 1.32)<br>AOR <sup>2</sup> 1.28 (95% CI 0.82, 1.16) |
| Matijasevich et al. 2012 <sup>16</sup> | Preterm | 3,453                            | 5th quintile (better-off)   | 1st quintile (poorest)                | AOR <sup>3</sup> 1.7 (95% CI 1.0, 3.0)*                                                                                                                                           |
| Stacey et al. 2016 <sup>15</sup>       | Preterm | 9,622                            | Managing financially        | Not managing financially <sup>4</sup> | AOR <sup>5</sup> 1.45 (95% CI 1.06, 1.98)*                                                                                                                                        |
| Stacey et al. 2016 <sup>15</sup>       | Preterm | 9,381                            | Not behind with bills       | Behind with bills <sup>6</sup>        | AOR <sup>5</sup> 1.01 (95% CI 0.74, 1.37)                                                                                                                                         |

Abbreviations: AOR=adjusted odds ratio, CI=confidence interval, \*=significant association

Footnotes:

- Note: low income is the reference group not high income measured by quintile based on equalised scales from the Organization for Economic Co-operation and Development.
- Adjusted for maternal age, parity, income, housing tenure, education, household employment, no contact with friends, family would not help financially, no other parents to talk to, marital status, ethnicity, self-rated health, smoking, alcohol, fetal sex, feeling toward pregnancy, antenatal care, delivery place, mode of delivery, induced labour, pregnancy complications (preeclampsia, preterm premature rupture of membranes, antepartum haemorrhage, placental disorder, amniotic fluid disorder, diabetes, genitourinary infection, maternal condition, intrauterine growth restriction, congenital anomaly).
- Adjusted for pre-pregnancy BMI, ethnic origin, maternal age, marital status, parity, urinary infection, hypertension, hospital admission during pregnancy, ever smoked during pregnancy, caesarean section, delivery assisted by a doctor, intrauterine growth restriction and socioeconomic position.
- Women were asked 'How well would you say you or you and your husband/partner are managing financially' Respondents were classed as either financially secure (if they reported they were 'living comfortably', 'doing alright' or 'just getting by' and struggling financially if they responded 'finding it quite difficult' or 'very difficult'.
- Adjusted for age, parity, BMI, ethnicity, migration history, health behaviours (smoking in pregnancy, alcohol in pregnancy), psycho-social factors (not married, more deprived Index of Multiple Deprivation, less education, at risk for distress, at risk of hopelessness, not managing financially, behind with bills) and medical conditions (diabetes and hypertension).
- Women were asked whether they were 'behind with bills' as a binary indicator (yes, no). No other details were provided.

Table q: Associations between housing and preterm birth (&lt;37 weeks).

| Study                                 | Outcome | Sample size | Comparison group             | Exposed group(s)   | Result(s)                                 |
|---------------------------------------|---------|-------------|------------------------------|--------------------|-------------------------------------------|
| Snelgrove & Murphy 2015 <sup>20</sup> | Preterm | 17,285      | Unowned/ rented <sup>1</sup> | Owned housing      | AOR <sup>2</sup> 0.98 (95% CI 0.82, 1.16) |
| Niedhammer et al. 2012 <sup>22</sup>  | Preterm | 900         | Rented home (No)             | Rented home (Yes)  | HR 1.98 (95% CI 1.06, 3.70)*              |
| Niedhammer et al. 2012 <sup>22</sup>  | Preterm | 916         | Crowded home (No)            | Crowded home (Yes) | HR 2.56 (95% CI 1.23, 5.32)*              |

Abbreviations: AOR=adjusted odds ratio, CI=confidence interval, HR=hazard ratio, \*=significant association

Footnotes:

- Note: unowned / rented housing used as comparison group and owned housing as the exposed group.
- Adjusted for age, parity, income, housing tenure, education, household employment, no contact with friends, family would not help financially, no other parents to talk to, marital status, ethnicity, self-rated health, smoking, alcohol, fetal sex, feeling toward pregnancy, antenatal care, delivery place, mode of delivery, induced labour, pregnancy complications.

Table r: Associations between occupation/social class and caesarean delivery.

| Study                                          | Outcome         | Sample size                      | Comparison group | Exposed group(s)                              | Result(s)                                                                                                                   |
|------------------------------------------------|-----------------|----------------------------------|------------------|-----------------------------------------------|-----------------------------------------------------------------------------------------------------------------------------|
| <b>Manual occupations and other categories</b> |                 |                                  |                  |                                               |                                                                                                                             |
| Brick et al. 2016 <sup>23</sup>                | Caesarean (any) | 7,721<br>6,417<br>7,422<br>9,852 | SEG-A            | SEG-D<br>Farmers<br>Unemployed<br>Home duties | OR 0.73 (95% CI 0.63, 0.84)*<br>OR 0.67 (95% CI 0.25, 1.80)<br>OR 0.59 (95% CI 0.50, 0.70)*<br>OR 0.71 (95% CI 0.64, 0.78)* |

|                                   |                                       |                                           |                                  |                                                                        |                                                                                                                                                                                     |
|-----------------------------------|---------------------------------------|-------------------------------------------|----------------------------------|------------------------------------------------------------------------|-------------------------------------------------------------------------------------------------------------------------------------------------------------------------------------|
|                                   |                                       | 8,261                                     |                                  | Other                                                                  | OR 0.53 (95% CI 0.47, 0.61)*                                                                                                                                                        |
| Brick et al. 2016 <sup>23</sup>   | Caesarean (elective)                  | 6,012<br>4,947<br>5,789<br>7,720<br>6,508 | SEG-A                            | SEG-D<br>Farmers<br>Unemployed<br>Home duties<br>Other                 | OR 0.71 (95% CI 0.54, 0.92)*<br>OR 0.60 (95% CI 0.08, 4.54)<br>OR 0.49 (95% CI 0.35, 0.69)*<br>OR 0.50 (95% CI 0.41, 0.62)*<br>OR 0.37 (95% CI 0.28, 0.50)*                         |
| Brick et al. 2016 <sup>23</sup>   | Caesarean (emergency)                 | 7,240<br>6,001<br>6,970<br>9,314<br>7,794 | SEG-A                            | SEG-D<br>Farmers<br>Unemployed<br>Home duties<br>Other                 | OR 0.73 (95% CI 0.63, 0.86)*<br>OR 0.68 (95% CI 0.23, 2.02)<br>OR 0.62 (95% CI 0.52, 0.74)*<br>OR 0.77 (95% CI 0.69, 0.85)*<br>OR 0.58 (95% CI 0.50, 0.66)*                         |
| Essex et al. 2013 <sup>24</sup>   | Caesarean (elective, primiparous)     | 1,817<br>2,373<br>1,855<br>1,619          | Higher managerial / professional | Lower supervisory/technical<br>Semi-routine<br>Routine<br>Unclassified | ARR <sup>1</sup> 2.59 (95% CI 1.30, 5.15)*<br>ARR <sup>1</sup> 2.44 (95% CI 1.37, 4.36)*<br>ARR <sup>1</sup> 2.86 (95% CI 1.33, 6.15)*<br>ARR <sup>1</sup> 2.09 (95% CI 0.89, 4.93) |
| Essex et al. 2013 <sup>24</sup>   | Caesarean (elective, multiparous)     | 2,419<br>3,209<br>2,504<br>2,112          | Higher managerial / professional | Lower supervisory/technical<br>Semi-routine<br>Routine<br>Unclassified | ARR <sup>1</sup> 1.17 (95% CI 0.81, 1.70)<br>ARR <sup>1</sup> 1.02 (95% CI 0.74, 1.41)<br>ARR <sup>1</sup> 1.36 (95% CI 0.86, 2.15)<br>ARR <sup>1</sup> 0.72 (95% CI 0.40, 1.31)    |
| Essex et al. 2013 <sup>24</sup>   | Caesarean (emergency, primiparous)    | 1,817<br>2,373<br>1,855<br>1,619          | Higher managerial / professional | Lower supervisory/technical<br>Semi-routine<br>Routine<br>Unclassified | ARR <sup>1</sup> 0.90 (95% CI 0.57, 1.42)<br>ARR <sup>1</sup> 0.95 (95% CI 0.64, 1.43)<br>ARR <sup>1</sup> 1.22 (95% CI 0.75, 1.98)<br>ARR <sup>1</sup> 0.94 (95% CI 0.48, 1.84)    |
| Essex et al. 2013 <sup>24</sup>   | Caesarean (emergency, multiparous)    | 2,419<br>3,209<br>2,504<br>2,112          | Higher managerial / professional | Lower supervisory/technical<br>Semi-routine<br>Routine<br>Unclassified | ARR <sup>1</sup> 1.60 (95% CI 0.97, 2.64)<br>ARR <sup>1</sup> 1.46 (95% CI 0.92, 2.31)<br>ARR <sup>1</sup> 1.12 (95% CI 0.65, 1.92)<br>ARR <sup>1</sup> 1.03 (95% CI 0.52, 2.05)    |
| Patel et al. 2005 <sup>25</sup>   | Caesarean (any)                       | 1,112<br>1,296<br>602                     | Professional                     | Skilled-manual<br>Partly skilled<br>Unskilled                          | OR 0.57 (95% CI 0.36, 0.90)*<br>OR 0.92 (95% CI 0.62, 1.38)<br>OR 1.07 (95% CI 0.62, 1.87)                                                                                          |
| Patel et al. 2005 <sup>25</sup>   | Caesarean (elective)                  | 1,112<br>1,296<br>602                     | Professional                     | Skilled-manual<br>Partly skilled<br>Unskilled                          | OR 0.70 (95% CI 0.34, 1.46)<br>OR 0.92 (95% CI 0.47, 1.81)<br>OR 1.89 (95% CI 0.86, 4.16)                                                                                           |
| Patel et al. 2005 <sup>25</sup>   | Caesarean (emergency)                 | 940<br>1,137<br>508                       | Professional                     | Skilled-manual<br>Partly skilled<br>Unskilled                          | OR 0.50 (95% CI 0.28, 0.88)*<br>OR 0.84 (95% CI 0.51, 1.37)<br>OR 0.60 (95% CI 0.27, 1.31)                                                                                          |
| Fairley et al. 2016 <sup>26</sup> | Caesarean (emergency, all births)     | Not reported                              | Top of social hierarchy          | Bottom of social hierarchy:<br>1990-1991<br>1999-2000                  | AOR <sup>2</sup> 1.13 (95% CI 1.04, 1.23)*<br>AOR <sup>2</sup> 1.02 (95% CI 0.93, 1.12)                                                                                             |
| Fairley et al. 2016 <sup>26</sup> | Caesarean (emergency, no previous CS) | Not reported                              | Top of social hierarchy          | Bottom of social hierarchy:<br>1990-1991<br>1999-2000                  | AOR <sup>2</sup> 1.15 (95% CI 1.05, 1.26)*<br>AOR <sup>2</sup> 1.04 (95% CI 0.93, 1.15)                                                                                             |
| Fairley et al. 2011 <sup>26</sup> | Caesarean (emergency, previous CS)    | Not reported                              | Top of social hierarchy          | Bottom of social hierarchy:<br>1990-1991<br>1999-2000                  | AOR <sup>2</sup> 1.03 (95% CI 0.81, 1.30)<br>AOR <sup>2</sup> 0.90 (95% CI 0.70, 1.17)                                                                                              |
| Fairley et al. 2011 <sup>26</sup> | Caesarean (elective, all births)      | Not reported                              | Top of social hierarchy          | Bottom of social hierarchy:<br>1990-1991<br>1999-2000                  | AOR <sup>2</sup> 1.04 (95% CI 0.92, 1.18)<br>AOR <sup>2</sup> 0.87 (95% CI 0.76, 1.00)                                                                                              |
| Fairley et al. 2011 <sup>26</sup> | Caesarean (elective, no previous CS)  | Not reported                              | Top of social hierarchy          | Bottom of social hierarchy:<br>1990-1991<br>1999-2000                  | AOR <sup>2</sup> 1.08 (95% CI 0.85, 1.37)<br>AOR <sup>2</sup> 0.91 (95% CI 0.73, 1.14)                                                                                              |
| Fairley et al. 2011 <sup>26</sup> | Caesarean (elective, previous CS)     | Not reported                              | Top of social hierarchy          | Bottom of social hierarchy:<br>1990-1991<br>1999-2000                  | AOR <sup>2</sup> 0.91 (95% CI 0.75, 1.10)<br>AOR <sup>2</sup> 0.81 (95% CI 0.65, 1.00)                                                                                              |
| <b>Non-manual occupations</b>     |                                       |                                           |                                  |                                                                        |                                                                                                                                                                                     |
| Brick et al. 2016 <sup>23</sup>   | Caesarean (any)                       | 9,663                                     | SEG-A                            | SEG-B                                                                  | OR 0.97 (95% CI 0.88, 1.06)                                                                                                                                                         |
| Brick et al. 2016 <sup>23</sup>   | Caesarean (elective)                  | 7,455                                     | SEG-A                            | SEG-B                                                                  | OR 0.92 (95% CI 0.77, 1.10)                                                                                                                                                         |

|                                 |                                    |                |                                  |                                              |                                                                                        |
|---------------------------------|------------------------------------|----------------|----------------------------------|----------------------------------------------|----------------------------------------------------------------------------------------|
| Brick et al. 2016 <sup>23</sup> | Caesarean (emergency)              | 9,050          | SEG-A                            | SEG-B                                        | OR 0.98 (95% CI 0.89, 1.09)                                                            |
| Essex et al. 2013 <sup>24</sup> | Caesarean (elective, primiparous)  | 3,167          | Higher managerial / professional | Lower managerial/professional                | ARR <sup>1</sup> 0.91 (95% CI 0.56, 1.50)                                              |
| Essex et al. 2013 <sup>24</sup> | Caesarean (elective, multiparous)  | 3,788          | Higher managerial / professional | Lower managerial/professional                | ARR <sup>1</sup> 1.13 (95% CI 0.86, 1.31)                                              |
| Essex et al. 2013 <sup>24</sup> | Caesarean (emergency, primiparous) | 3,167          | Higher managerial / professional | Lower managerial/professional                | ARR <sup>1</sup> 0.87 (95% CI 0.66, 1.14)                                              |
| Essex et al. 2013 <sup>24</sup> | Caesarean (emergency, multiparous) | 3,788          | Higher managerial / professional | Lower managerial/professional                | ARR <sup>1</sup> 1.22 (95% CI 0.87, 1.73)                                              |
| Patel et al. 2005 <sup>25</sup> | Caesarean (any)                    | 3,090<br>4,385 | Professional                     | Managerial/clerical<br>Skilled non-manual    | OR 1.08 (95% CI 0.75, 1.54)<br>OR 0.93 (95% CI 0.65, 1.32)                             |
| Patel et al. 2005 <sup>25</sup> | Caesarean (elective)               | 3,090<br>4,385 | Professional                     | Managerial/clerical<br>Skilled non-manual    | OR 1.34 (95% CI 0.75, 2.39)<br>OR 1.09 (95% CI 0.61, 1.95)                             |
| Patel et al. 2005 <sup>25</sup> | Caesarean (emergency)              | 2,511<br>3,666 | Professional                     | Managerial/clerical<br>Skilled non-manual    | OR 0.95 (95% CI 0.61, 1.47)<br>OR 0.83 (95% CI 0.54, 1.28)                             |
| <b>Intermediate occupations</b> |                                    |                |                                  |                                              |                                                                                        |
| Brick et al. 2016 <sup>23</sup> | Caesarean (any)                    | 18,898         | SEG-A                            | SEG-C                                        | OR 0.87 (95% CI 0.81, 0.93)*                                                           |
| Brick et al. 2016 <sup>23</sup> | Caesarean (elective)               | 14,792         | SEG-A                            | SEG-C                                        | OR 0.81 (95% CI 0.71, 0.92)*                                                           |
| Brick et al. 2016 <sup>23</sup> | Caesarean (emergency)              | 17,798         | SEG-A                            | SEG-C                                        | OR 0.89 (95% CI 0.82, 0.95)*                                                           |
| Essex et al. 2013 <sup>24</sup> | Caesarean (elective, primiparous)  | 2,322<br>1,527 | Higher managerial / professional | Intermediate<br>Small employer/self-employed | ARR <sup>1</sup> 1.52 (95% CI 0.86, 2.70)<br>ARR <sup>1</sup> 1.79 (95% CI 0.88, 3.67) |
| Essex et al. 2013 <sup>24</sup> | Caesarean (elective, multiparous)  | 2,620<br>2,216 | Higher managerial / professional | Intermediate<br>Small employer/self-employed | ARR <sup>1</sup> 1.21 (95% CI 0.87, 1.67)<br>ARR <sup>1</sup> 1.36 (95% CI 0.95, 1.95) |
| Essex et al. 2013 <sup>24</sup> | Caesarean (emergency, primiparous) | 2,322<br>1,527 | Higher managerial / professional | Intermediate<br>Small employer/self-employed | ARR <sup>1</sup> 1.09 (95% CI 0.77, 1.55)<br>ARR <sup>1</sup> 1.14 (95% CI 0.63, 2.08) |
| Essex et al. 2013 <sup>24</sup> | Caesarean (emergency, multiparous) | 2,620<br>2,216 | Higher managerial / professional | Intermediate<br>Small employer/self-employed | ARR <sup>1</sup> 1.13 (95% CI 0.74, 1.73)<br>ARR <sup>1</sup> 1.30 (95% CI 0.79, 2.15) |

Abbreviations: OR=odds ratio, AOR=adjusted odds ratio, ARR=adjusted relative ratio, CI=confidence interval, \*=significant association, SEG-A=Higher professionals/ lower professionals, SEG-B=Employers and managers/ salaried employees, SEG-C=Non-manual wage earners (or intermediate non-manual workers)/ other non-manual workers and skilled manual workers, SEG-D=Semi-skilled manual workers/ unskilled manual workers and farm labourers.

Footnote:

- Adjusted for height, feelings about pregnancy, fertility treatment, pre-pregnancy BMI, problems during pregnancy, induction of labour, complications during labour, companionship during labour, birthweight and gestational age.
- AOR based on Relative Index of Inequality (RII) to account for changes in social class inequalities and caesareans over time. Adjusted for maternal age, maternal height, parity, gestational age, marital status, social class and area deprivation.

Table s: Associations between income/finances and mode of delivery.

| Study                                  | Outcome                         | Sample size | Comparison group          | Exposed group(s)       | Result(s)                               |
|----------------------------------------|---------------------------------|-------------|---------------------------|------------------------|-----------------------------------------|
| Matijasevich et al. 2012 <sup>16</sup> | Caesarean                       | 3,453       | 5th quintile (better-off) | 1st quintile (poorest) | AOR <sup>1</sup> 0.6 (95% CI 0.4, 0.9)* |
| Matijasevich et al. 2012 <sup>16</sup> | Delivery not assisted by doctor | 3,453       | 5th quintile (better-off) | 1st quintile (poorest) | AOR <sup>2</sup> 1.3 (95% CI 1.0, 1.8)* |

Abbreviations: AOR=adjusted odds ratio, CI=confidence interval, \*=significant association.

Footnote:

- Adjusted for pre-pregnancy BMI, ethnic origin, maternal age, marital status, parity, urinary tract infection, hypertension, hospital admission during pregnancy, ever smoked during pregnancy and education.

2. Adjusted for pre-pregnancy BMI, ethnic origin, maternal age, marital status, parity, urinary tract infection, hypertension, hospital admission during pregnancy, ever smoked during pregnancy, caesarean section and education.

Table t: Associations between housing and caesarean delivery.

| Study                           | Outcome               | Sample size              | Comparison group | Exposed group(s)                                 | Result(s)                                                                                    |
|---------------------------------|-----------------------|--------------------------|------------------|--------------------------------------------------|----------------------------------------------------------------------------------------------|
| Patel et al. 2005 <sup>25</sup> | Caesarean (any)       | 9,752<br>10,781<br>9,299 | Own/<br>mortgage | Private/ rental<br>Council/housing ass.<br>Other | OR 0.84 (95% CI 0.65, 1.09)<br>OR 0.77 (95% CI 0.64, 0.93)*<br>OR 1.13 (95% CI 0.82, 1.55)   |
| Patel et al. 2005 <sup>25</sup> | Caesarean (elective)  | 9,752<br>10,781<br>9,299 | Own/<br>mortgage | Private/ rental<br>Council/housing ass.<br>Other | OR 0.36 (95% CI 0.21, 0.63)*<br>OR 0.75 (95% CI 0.57, 1.00)<br>OR 0.58 (95% CI 0.31, 1.10)   |
| Patel et al. 2005 <sup>25</sup> | Caesarean (emergency) | 8,172<br>9,161<br>7,784  | Own/<br>mortgage | Private/ rental<br>Council/housing ass.<br>Other | OR 1.20 (95% CI 0.90, 1.59)<br>OR 0.72 (95% CI 0.57, 0.92)*<br>OR 1.45 (95% CI 1.00, 2.10) * |

Abbreviations: AOR=adjusted odds ratio, CI=confidence interval, ass.=association, \*=significant association

Table u: Associations between education and mode of delivery.

| Study                                  | Outcome                                  | Sample size                               | Comparison group   | Exposed group(s)                                                            | Result(s)                                                                                                                                                                                                                      |
|----------------------------------------|------------------------------------------|-------------------------------------------|--------------------|-----------------------------------------------------------------------------|--------------------------------------------------------------------------------------------------------------------------------------------------------------------------------------------------------------------------------|
| Essex et al. 2013 <sup>24</sup>        | Instrumental vaginal birth (primiparous) | 3,717<br>4,654<br>3,116<br>3,252<br>2,657 | NVQ level 4/5      | NVQ level 3<br>NVQ level 2<br>NVQ level 1<br>None<br>Overseas qualification | ARR <sup>1</sup> 0.89 (95% CI 0.68, 1.17)<br>ARR <sup>1</sup> 0.96 (95% CI 0.72, 1.27)<br>ARR <sup>1</sup> 1.02 (95% CI 0.69, 1.51)<br>ARR <sup>1</sup> 0.83 (95% CI 0.52, 1.32)<br>ARR <sup>1</sup> 1.09 (95% CI 0.44, 2.70)  |
| Essex et al. 2013 <sup>24</sup>        | Instrumental vaginal birth (multiparous) | 4,082<br>5,841<br>3,650<br>4,884<br>3,107 | NVQ level 4/5      | NVQ level 3<br>NVQ level 2<br>NVQ level 1<br>None<br>Overseas qualification | ARR <sup>1</sup> 0.85 (95% CI 0.54, 1.35)<br>ARR <sup>1</sup> 1.25 (95% CI 0.86, 1.81)<br>ARR <sup>1</sup> 1.03 (95% CI 0.57, 1.87)<br>ARR <sup>1</sup> 0.89 (95% CI 0.47, 1.68)<br>ARR <sup>1</sup> 2.08 (95% CI 0.99, 4.36)  |
| Essex et al. 2013 <sup>24</sup>        | Caesarean (elective, primiparous)        | 3,717<br>4,654<br>3,116<br>3,252<br>2,657 | NVQ level 4/5      | NVQ level 3<br>NVQ level 2<br>NVQ level 1<br>None<br>Overseas qualification | ARR <sup>1</sup> 0.74 (95% CI 0.44, 1.25)<br>ARR <sup>1</sup> 0.86 (95% CI 0.54, 1.35)<br>ARR <sup>1</sup> 0.90 (95% CI 0.44, 1.82)<br>ARR <sup>1</sup> 0.47 (95% CI 0.21, 1.03)<br>ARR <sup>1</sup> 1.10 (95% CI 0.37, 3.23)  |
| Essex et al. 2013 <sup>24</sup>        | Caesarean (elective, multiparous)        | 4,082<br>5,841<br>3,650<br>4,884<br>3,107 | NVQ level 4/5      | NVQ level 3<br>NVQ level 2<br>NVQ level 1<br>None<br>Overseas qualification | ARR <sup>1</sup> 0.72 (95% CI 0.51, 0.99)*<br>ARR <sup>1</sup> 1.06 (95% CI 0.84, 1.34)<br>ARR <sup>1</sup> 1.17 (95% CI 0.78, 1.77)<br>ARR <sup>1</sup> 1.19 (95% CI 0.86, 1.65)<br>ARR <sup>1</sup> 1.14 (95% CI 0.65, 2.00) |
| Essex et al. 2013 <sup>24</sup>        | Caesarean (emergency, primiparous)       | 3,717<br>4,654<br>3,116<br>3,252<br>2,657 | NVQ level 4/5      | NVQ level 3<br>NVQ level 2<br>NVQ level 1<br>None<br>Overseas qualification | ARR <sup>1</sup> 0.92 (95% CI 0.70, 1.23)<br>ARR <sup>1</sup> 0.82 (95% CI 0.60, 1.11)<br>ARR <sup>1</sup> 0.92 (95% CI 0.57, 1.48)<br>ARR <sup>1</sup> 1.20 (95% CI 0.75, 1.94)<br>ARR <sup>1</sup> 2.23 (95% CI 0.95, 5.26)  |
| Essex et al. 2013 <sup>24</sup>        | Caesarean (emergency, multiparous)       | 4,082<br>5,841<br>3,650<br>4,884<br>3,107 | NVQ level 4/5      | NVQ level 3<br>NVQ level 2<br>NVQ level 1<br>None<br>Overseas qualification | ARR <sup>1</sup> 0.77 (95% CI 0.51, 1.16)<br>ARR <sup>1</sup> 0.78 (95% CI 0.57, 1.07)<br>ARR <sup>1</sup> 1.12 (95% CI 0.72, 1.74)<br>ARR <sup>1</sup> 0.85 (95% CI 0.56, 1.30)<br>ARR <sup>1</sup> 0.55 (95% CI 0.26, 1.19)  |
| Matijasevich et al. 2012 <sup>16</sup> | Caesarean                                | 6,737                                     | A-level/<br>degree | CSE/none                                                                    | AOR <sup>2</sup> 0.9 (95% CI 0.7, 1.4)                                                                                                                                                                                         |
| Matijasevich et al. 2012 <sup>16</sup> | Delivery not assisted by doctor          | 6,737                                     | A-level/<br>degree | CSE/none                                                                    | AOR <sup>3</sup> 1.8 (95% CI 1.3, 2.5)*                                                                                                                                                                                        |

AOR=adjusted odds ratio, ARR=adjusted relative risk, CI=confidence interval, \*=significant association, NVQ=National Vocational Qualification; A-level=Advanced Level, CSE=Certificate of Secondary Education.

Footnote:

- Adjusted for height, feelings about pregnancy, fertility treatment, pre-pregnancy BMI, problems during pregnancy, induction of labour, complications during labour, companionship during labour, birthweight and gestational age.
- Adjusted for pre-pregnancy BMI, ethnic origin, maternal age, marital status, parity, urinary tract infection, hypertension, hospital admission during pregnancy, ever smoked during pregnancy and education.

3. Adjusted for pre-pregnancy BMI, ethnic origin, maternal age, marital status, parity, urinary tract infection, hypertension, hospital admission during pregnancy, ever smoked during pregnancy, caesarean section and education.

Table v: Associations between employment and caesarean delivery.

| Study                           | Outcome                                  | Sample size      | Comparison group               | Exposed group(s) | Result(s)                                                    |
|---------------------------------|------------------------------------------|------------------|--------------------------------|------------------|--------------------------------------------------------------|
| Patel et al. 2005 <sup>25</sup> | Caesarean (any)<br>Caesarean (emergency) | 11,808<br>10,041 | Mostly sitting:<br>No          | Yes              | OR 1.24 (95% CI 1.10, 1.41)*<br>OR 1.68 (95% CI 1.43, 1.97)* |
| Patel et al. 2005 <sup>25</sup> | Caesarean (any)<br>Caesarean (emergency) | 11,817<br>10,051 | Bending a lot:<br>No           | Yes              | OR 0.77 (95% CI 0.68, 0.89)*<br>OR 0.67 (95% CI 0.56, 0.80)* |
| Patel et al. 2005 <sup>25</sup> | Caesarean (any)<br>Caesarean (emergency) | 11,819<br>10,053 | Standing a lot:<br>No          | Yes              | OR 0.78 (95% CI 0.68, 0.90)*<br>OR 0.73 (95% CI 0.61, 0.87)* |
| Patel et al. 2005 <sup>25</sup> | Caesarean (any)<br>Caesarean (emergency) | 11,812<br>10,045 | Demanding task:<br>No          | Yes              | OR 1.19 (95% CI 1.05, 1.35)*<br>OR 1.58 (95% CI 1.34, 1.85)* |
| Patel et al. 2005 <sup>25</sup> | Caesarean (any)<br>Caesarean (emergency) | 11,819<br>10,053 | Physical exertion:<br>No       | Yes              | OR 0.84 (95% CI 0.73, 0.97)*<br>OR 0.75 (95% CI 0.63, 0.89)* |
| Patel et al. 2005 <sup>25</sup> | Caesarean (any)<br>Caesarean (emergency) | 10,707<br>9,077  | Worked during pregnancy:<br>No | Yes              | OR 1.36 (95% CI 1.17, 1.59)*<br>OR 2.23 (95% CI 1.80, 2.77)* |
| Patel et al. 2005 <sup>25</sup> | Caesarean (any)<br>Caesarean (emergency) | Not reported     | Work per week (hrs/50):<br>No  | Yes              | OR 1.27 (95% CI 1.01, 1.57)*<br>OR 2.01 (95% CI 1.55, 2.61)* |

Abbreviations: OR=odds ratio, CI=confidence interval, \*=significant association.

Table w: Associations between occupation/social class and instrumental delivery.

| Study                           | Outcome                                  | Sample size                                                 | Comparison group                 | Exposed group(s)                                                                                                                                        | Result(s)                                                                                                                                                                                                                                                                                                                  |
|---------------------------------|------------------------------------------|-------------------------------------------------------------|----------------------------------|---------------------------------------------------------------------------------------------------------------------------------------------------------|----------------------------------------------------------------------------------------------------------------------------------------------------------------------------------------------------------------------------------------------------------------------------------------------------------------------------|
| Essex et al. 2013 <sup>24</sup> | Instrumental vaginal birth (primiparous) | 3,167<br>2,322<br>1,527<br>1,817<br>2,373<br>1,855<br>1,619 | Higher managerial / professional | Lower managerial/professional<br>Intermediate<br>Small employer/self-employed<br>Lower supervisory/technical<br>Semi-routine<br>Routine<br>Unclassified | ARR <sup>1</sup> 1.24 (95% CI 0.94, 1.64)<br>ARR <sup>1</sup> 1.49 (95% CI 1.08, 2.07)*<br>ARR <sup>1</sup> 1.52 (95% CI 0.96, 2.39)<br>ARR <sup>1</sup> 1.50 (95% CI 1.01, 2.23)*<br>ARR <sup>1</sup> 1.31 (95% CI 0.90, 1.91)<br>ARR <sup>1</sup> 1.56 (95% CI 1.02, 2.39)*<br>ARR <sup>1</sup> 1.58 (95% CI 0.95, 2.61) |
| Essex et al. 2013 <sup>24</sup> | Instrumental vaginal birth (multiparous) | 3,788<br>2,620<br>2,216<br>2,419<br>3,209<br>2,504<br>2,112 | Higher managerial / professional | Lower managerial/professional<br>Intermediate<br>Small employer/self-employed<br>Lower supervisory/technical<br>Semi-routine<br>Routine<br>Unclassified | ARR <sup>1</sup> 1.23 (95% CI 0.78, 1.93)<br>ARR <sup>1</sup> 0.91 (95% CI 0.44, 1.86)<br>ARR <sup>1</sup> 0.83 (95% CI 0.37, 1.87)<br>ARR <sup>1</sup> 1.21 (95% CI 0.59, 2.47)<br>ARR <sup>1</sup> 1.38 (95% CI 0.79, 2.42)<br>ARR <sup>1</sup> 1.51 (95% CI 0.71, 3.22)<br>ARR <sup>1</sup> 1.32 (95% CI 0.46, 3.76)    |

Abbreviations: ARR=adjusted relative risk, CI=confidence interval, \*=significant association.

Footnote:

1. Adjusted for height, feelings about pregnancy, fertility treatment, pre-pregnancy BMI, problems during pregnancy, induction of labour, complications during labour, companionship during labour, birthweight and gestational age.

Table x: Associations between occupation/social class and induction

| Study                             | Outcome                                         | Sample size                                             | Comparison group        | Exposed group(s)                                                                    | Result(s)                                                                                                                                                                                    |
|-----------------------------------|-------------------------------------------------|---------------------------------------------------------|-------------------------|-------------------------------------------------------------------------------------|----------------------------------------------------------------------------------------------------------------------------------------------------------------------------------------------|
| Sinnott et al. 2016 <sup>27</sup> | Induction (nulliparous)                         | 16,640<br>10,741<br>13,336<br>9,886<br>12,274<br>10,715 | Professional/managerial | Clerical<br>Skilled/semi-skilled<br>Unskilled<br>Unemployed<br>Home duties<br>Other | OR 0.95 (95% CI 0.89, 1.01)<br>OR 0.91 (95% CI 0.82, 1.02)<br>OR 0.88 (95% CI 0.81, 0.95)*<br>OR 0.80 (95% CI 0.69, 0.92)*<br>OR 0.81 (95% CI 0.75, 0.89)*<br>OR 0.84 (95% CI 0.75, 0.94)*   |
| Sinnott et al. 2016 <sup>27</sup> | Induction (multiparous without prior caesarean) | 15,218<br>9,666<br>12,281<br>9,097<br>18,066<br>9,098   | Professional/managerial | Clerical<br>Skilled/semi-skilled<br>Unskilled<br>Unemployed<br>Home duties<br>Other | OR 0.89 (95% CI 0.83, 0.96)*<br>OR 0.76 (95% CI 0.67, 0.87)*<br>OR 0.81 (95% CI 0.74, 0.88)*<br>OR 0.68 (95% CI 0.57, 0.81)*<br>OR 0.81 (95% CI 0.75, 0.86)*<br>OR 0.85 (95% CI 0.72, 1.00)* |

|                                   |                                              |                                                    |                             |                                                                                     |                                                                                                                                                                                        |
|-----------------------------------|----------------------------------------------|----------------------------------------------------|-----------------------------|-------------------------------------------------------------------------------------|----------------------------------------------------------------------------------------------------------------------------------------------------------------------------------------|
| Sinnott et al. 2016 <sup>27</sup> | Induction (multiparous with prior caesarean) | 4,003<br>2,643<br>3,157<br>2,456<br>4,495<br>2,478 | Professional/<br>managerial | Clerical<br>Skilled/semi-skilled<br>Unskilled<br>Unemployed<br>Home duties<br>Other | OR 0.84 (95% CI 0.60, 1.17)<br>OR 0.72 (95% CI 0.37, 1.39)<br>OR 0.86 (95% CI 0.57, 1.31)<br>OR 0.08 (95% CI 0.00, 1.24)<br>OR 0.96 (95% CI 0.71, 1.29)<br>OR 0.98 (95% CI 0.45, 2.14) |
|-----------------------------------|----------------------------------------------|----------------------------------------------------|-----------------------------|-------------------------------------------------------------------------------------|----------------------------------------------------------------------------------------------------------------------------------------------------------------------------------------|

Abbreviations: OR=odds ratio, CI=confidence interval, \*=significant association

Table y: Associations between occupation class and maternal morbidity.

| Study                                 | Outcome                                       | Sample size             | Comparison group            | Exposed group(s)                                 | Result(s)                                                                                                                        |
|---------------------------------------|-----------------------------------------------|-------------------------|-----------------------------|--------------------------------------------------|----------------------------------------------------------------------------------------------------------------------------------|
| Fitzpatrick et al. 2012 <sup>28</sup> | Placenta accreta/ increta/ percreta           | 312                     | Managerial/<br>professional | Other occupations <sup>1</sup>                   | OR 0.86 (95% CI 0.52, 1.41)                                                                                                      |
| Waterstone et al. 2001 <sup>29</sup>  | Severe maternal morbidity <sup>2</sup>        | 2,324<br>2042           | Non-manual                  | Manual<br>Unemployed                             | OR 0.83 (95% CI 0.66, 1.06)<br>OR 1.25 (95% CI 0.95, 1.64)                                                                       |
| Nair et al. 2014 <sup>30</sup>        | Maternal morbidity <sup>3</sup>               | 2,330<br>2,661<br>2,011 | Managerial                  | Intermediate<br>Routine and manual<br>Unemployed | OR <sup>3</sup> 1.04 (95% CI 0.87, 1.24)<br>OR <sup>3</sup> 0.94 (95% CI 0.79, 1.11)<br>OR <sup>3</sup> 0.92 (95% CI 0.74, 1.15) |
| Bush et al. 2013 <sup>31</sup>        | Myocardial infarction                         | 1,240                   | Professional/<br>managerial | Other/ unemployed                                | OR 0.8 (95% CI 0.32, 2.02)                                                                                                       |
| Scott et al. 2012 <sup>32</sup>       | Nonhemorrhagic antenatal stroke               | 85                      | Professional/<br>managerial | Nonprofessional/managerial                       | OR 4.6 (95% CI 0.6, 207)                                                                                                         |
| Scott et al. 2012 <sup>32</sup>       | Hemorrhagic antenatal stroke                  | 82                      | Professional/<br>managerial | Nonprofessional/managerial                       | OR 0.2 (95% CI 0.03, 0.83)*                                                                                                      |
| Scott et al. 2012 <sup>32</sup>       | All antenatal stroke                          | 95                      | Professional/<br>managerial | Nonprofessional/managerial                       | OR 0.7 (95% CI 0.2, 2.3)                                                                                                         |
| Fitzpatrick et al. 2015 <sup>33</sup> | Amniotic-fluid embolism                       | 3,154                   | Professional/<br>managerial | Nonprofessional/managerial                       | OR 0.81 (95% CI 0.52, 1.24)                                                                                                      |
| Fitzpatrick et al. 2015 <sup>33</sup> | Amniotic-fluid embolism (severe) <sup>5</sup> | 3,154                   | Professional/<br>managerial | Nonprofessional/managerial                       | OR 0.81 (95% CI 0.37, 1.78)                                                                                                      |

Abbreviations: OR=odds ratio, CI=confidence interval

Footnote:

1. No description of other occupations reported in paper.
2. Severe maternal morbidity defined as antenatal pulmonary embolism, eclampsia, acute fatty liver of pregnancy, amniotic fluid embolism, peripartum hysterectomy stroke in pregnancy, uterine rupture, placenta accreta, HELLP syndrome and severe sepsis).
3. Maternal morbidity defined as (defined as severe pre-eclampsia; eclampsia; HELLP syndrome; severe haemorrhage; severe sepsis; and uterine rupture).
4. Adjusted for anaemia in current pregnancy, diabetes in current pregnancy, previous pregnancy problems, pre-existing medical problems, parity, smoking and inadequate utilisation of antenatal care services, socioeconomic status, age and BMI.
5. Adjusted for age, ethnic group, socio-economic group, BMI at time of booking, smoking status, parity, multiple pregnancy, induction of labour using any method, gestation age at delivery, macrosomia and placenta praevia.
6. Severe amniotic-fluid embolism defined as women who died or had permanent neurological injury.

Table z: Associations between education and congenital anomalies.

| Study                              | Outcome              | Sample size                               | Comparison group                     | Exposed group(s)                                                  | Result(s)                                                                                                                                                   |
|------------------------------------|----------------------|-------------------------------------------|--------------------------------------|-------------------------------------------------------------------|-------------------------------------------------------------------------------------------------------------------------------------------------------------|
| Sheridan et al. 2014 <sup>34</sup> | Congenital anomalies | 5,365<br>6,400<br>4,556<br>3,538<br>3,027 | Diploma,<br>degree, higher<br>degree | <5 GCSE<br>≥5 GCSE (A-C)<br>2 A-level<br>Other<br>Foreign unknown | OR 1.95 (95% CI 1.43, 2.66)*<br>OR 1.64 (95% CI 1.22, 2.22)*<br>OR 1.35 (95% CI 0.93, 1.96)<br>OR 1.64 (95% CI 1.02, 2.67)*<br>OR 2.37 (95% CI 1.01, 5.59)* |

Abbreviations: OR=odds ratio, CI=confidence interval, \*=significant association, GCSE=General Certificate of Higher Education, A level=Advance Level

## References

1. Gardosi J, Madurasinghe V, Williams M, et al. Maternal and fetal risk factors for stillbirth: population based study. *BMJ* 2013;346:f108.
2. Office for National Statistics. Mortality Statistics: Childhood, infant and perinatal, England and Wales (1990 - 2007) and Child mortality (death cohort) tables in England and Wales (2008 - 2017). Newport, Wales, 1990 - 2017.
3. National Records of Scotland. Numbers of births, stillbirths and neonatal deaths, registered in Scotland in each year from 1990 to 2018 [bespoke request]. Edinburgh: National Records of Scotland, 2019.
4. National Perinatal Reporting System. Perinatal Statistics. Dublin, Republic of Ireland, 1990-3, 1999-2016.
5. Tuthill DP, Stewart JH, Coles EC, et al. Maternal cigarette smoking and pregnancy outcome. *Paediatric and Perinatal Epidemiology* 1999;13(3):245-53.
6. Nair M, Knight M, Kurinczuk JJ. Risk factors and newborn outcomes associated with maternal deaths in the UK from 2009 to 2013: a national case-control study. *BJOG: An International Journal of Obstetrics & Gynaecology* 2016;123(10):1654.
7. McAvoy H, Sturley J, Burke S, et al. Unequal at Birth: Inequalities in the occurrence of low birthweight babies in Ireland. Dublin/Belfast: Institute of Public Health in Ireland, 2006:96.
8. Fairley L, Leyland AH. Social class inequalities in perinatal outcomes: Scotland 1980-2000. *Journal of Epidemiology and Community Health* 2006;60(1):31-36.
9. Collingwood Bakeo A, Clarke Y. Risk factors for low birthweight based on birth registration and census information, England and Wales, 1981-2000. *Health Statistics Quarterly* 2006(30):15-21.
10. Niedhammer I, O'Mahony D, Daly S, et al. Occupational predictors of pregnancy outcomes in Irish working women in the Lifeways cohort. *BJOG: An International Journal of Obstetrics & Gynaecology* 2009;116(7):943-52.
11. Wilding S, Ziauddeen N, Roderick P, et al. Are socioeconomic inequalities in the incidence of small-for-gestational-age birth narrowing? Findings from a population-based cohort in the South of England. *BMJ Open* 2019;9(7):e026998.
12. Martinson ML, Reichman NE. Socioeconomic Inequalities in Low Birth Weight in the United States, the United Kingdom, Canada, and Australia. *American Journal of Public Health* 2016;106(4):748-54. doi: 10.2105/AJPH.2015.303007
13. Murrin C, Segonds-Pichon A, Fallon U, et al. Self-reported pre-pregnancy maternal body mass index and infant birth-weight. *Irish Medical Journal* 2007;100(8):20-3.
14. Wolke D, Eryigit-Madzwamuse S, Gutbrod T. Very preterm/very low birthweight infants' attachment: Infant and maternal characteristics. *Archives of Disease in Childhood: Fetal and Neonatal Edition* 2014;99(1):F70-F75.
15. Stacey T, Prady S, Haith-Cooper M, et al. Ethno-Specific Risk Factors for Adverse Pregnancy Outcomes: Findings from the Born in Bradford Cohort Study. *Maternal and Child Health Journal* 2016;20(7):1394-404.
16. Matijasevich A, Victora CG, Lawlor DA, et al. Association of socioeconomic position with maternal pregnancy and infant health outcomes in birth cohort studies from Brazil and the UK. *Journal of Epidemiology & Community Health* 2012;66(2):127-35. doi: 10.1136/jech.2010.108605
17. Dibben C, Sigala M, Macfarlane A. Area deprivation, individual factors and low birth weight in England: is there evidence of an 'area effect'? *Journal of Epidemiology & Community Health* 2006;60(12):1053-59.
18. Clemens T, Dibben C. Living in stressful neighbourhoods during pregnancy: an observational study of crime rates and birth outcomes. *European Journal of Public Health* 2017;27(2):197-202.
19. Vinturache A, McKeating A, Daly N, et al. Maternal body mass index and the prevalence of spontaneous and elective preterm deliveries in an Irish obstetric population: a retrospective cohort study. *BMJ Open* 2017;7(10):e015258. doi: 10.1136/bmjopen-2016-015258
20. Snelgrove JW, Murphy KE. Preterm birth and social inequality: assessing the effects of material and psychosocial disadvantage in a UK birth cohort. *Acta Obstetrica et Gynecologica Scandinavica* 2015;94(7):766-75.
21. Poulsen G, Strandberg-Larsen K, Mortensen L, et al. Exploring Educational Disparities in Risk of Preterm Delivery: A Comparative Study of 12 European Birth Cohorts. *Paediatric and Perinatal Epidemiology* 2015;29(3):172-83.
22. Niedhammer I, Murrin C, O'Mahony D, et al. Explanations for social inequalities in preterm delivery in the prospective Lifeways cohort in the Republic of Ireland. *European Journal of Public Health* 2012;22(4):533-38.
23. Brick A, Layte R, Nolan A, et al. Differences in nulliparous caesarean section rates across models of care: a decomposition analysis. *BMC Health Serv Res* 2016;16:239-39. doi: 10.1186/s12913-016-1494-3
24. Essex HN, Green J, Baston H, et al. Which women are at an increased risk of a caesarean section or an instrumental vaginal birth in the UK: an exploration within the Millennium Cohort Study. *BJOG: An International Journal of Obstetrics & Gynaecology* 2013;120(6):732.
25. Patel RR, Peters TJ, Murphy DJ. Prenatal risk factors for Caesarean section. Analyses of the ALSPAC cohort of 12 944 women in England. *International Journal of Epidemiology* 2005;34(2):353-67.
26. Fairley L, Dundas R, Leyland AH. The influence of both individual and area based socioeconomic status on temporal trends in Caesarean sections in Scotland 1980-2000. *BMC Public Health* 2011;11(1):330-30.
27. Sinnott S-J, Layte R, Brick A, et al. Variation in induction of labour rates across Irish hospitals; a cross-sectional study. *The European Journal of Public Health* 2016;26(5):753-60.
28. Fitzpatrick KE, Sellers S, Spark P, et al. Incidence and risk factors for placenta accreta/increta/percreta in the UK: a national case-control study. *PLoS One* 2012;7(12):e52893.
29. Waterstone M, Bewley S, Wolfe C. Incidence and predictors of severe obstetric morbidity: case-control study. *BMJ* 2001;322(7294):1089-94.

30. Nair M, Kurinczuk JJ, Knight M. Ethnic variations in severe maternal morbidity in the UK— a case control study. *PLoS ONE* 2014;9(4):e95086.
31. Bush N, Nelson-Piercy C, Spark P, et al. Myocardial infarction in pregnancy and postpartum in the UK. *European Journal of Preventive Cardiology* 2013;20(1):12-20.
32. Scott CA, Bewley S, Rudd A, et al. Incidence, risk factors, management, and outcomes of stroke in pregnancy. *Obstetrics & Gynecology* 2012;120(2 Part 1):318-24.
33. Fitzpatrick K, Tuffnell D, Kurinczuk J, et al. Incidence, risk factors, management and outcomes of amniotic-fluid embolism: a population-based cohort and nested case-control study. *BJOG: An International Journal of Obstetrics & Gynaecology* 2015;123(1):100-09.
34. Sheridan E, Wright J, Small N, et al. Risk factors for congenital anomaly in a multiethnic birth cohort: an analysis of the Born in Bradford study. *The Lancet* 2013;382(9901):1350.

Supplementary appendix S12: Additional meta-analyses comparisons

A. Stillbirth

(i) Funnel plot

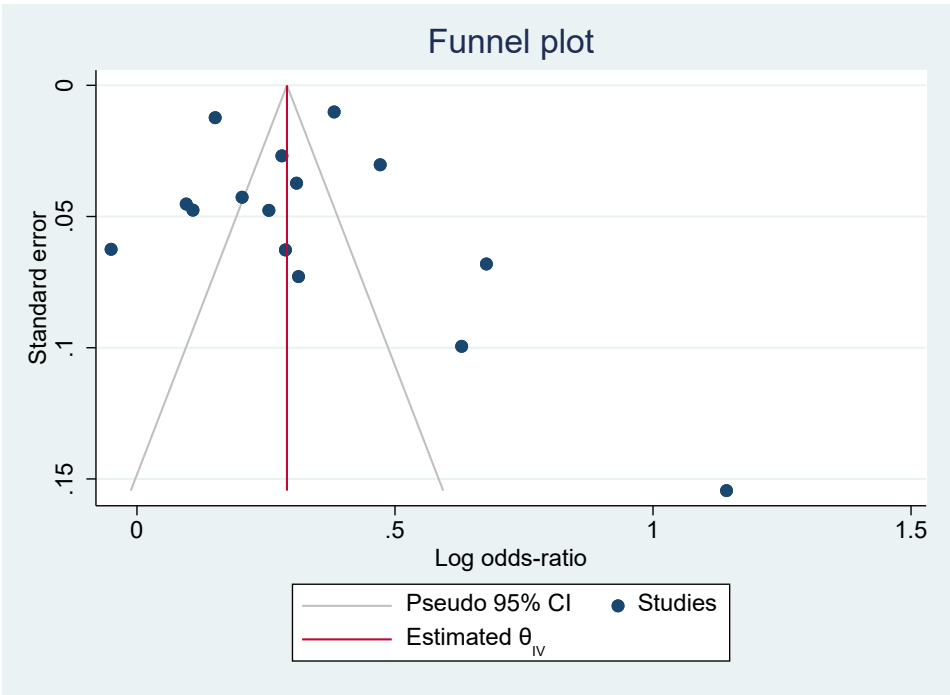

(ii) Eggers test of publication bias

H0:  $\beta_1 = 0$ ; no small-study effects  
 $\beta_1 = 5.12$   
SE of  $\beta_1 = 1.702$   
 $z = 3.01$   
**Prob > |z| = 0.0026**

(iii) Meta regression

| Variable                                              | Number of studies | Meta-regression residual $I^2$ (%) | Coefficient | P value |
|-------------------------------------------------------|-------------------|------------------------------------|-------------|---------|
| All studies                                           | 15                |                                    |             |         |
| Duration of data collection<br>≥10 years<br><10 years | 9<br>6            | 98.79%                             | 0.0222019   | p=0.876 |
| Country<br>UK<br>Ireland                              | 10<br>5           | 98.75%                             | -0.1046551  | p=0.471 |

| Variable                    | Number of studies | Meta-regression residual $I^2$ (%) | Coefficient | P value |
|-----------------------------|-------------------|------------------------------------|-------------|---------|
| All studies                 | 15                |                                    |             |         |
| Duration of data collection |                   |                                    |             |         |
| $\geq 10$ years             | 9                 | 98.79%                             | 0.0222019   | p=0.876 |
| <10 years                   | 6                 |                                    |             |         |
| Region                      |                   |                                    |             |         |
| England and Wales           | 5                 | 98.72%                             | -0.0069107  | p=0.935 |
| Scotland                    | 5                 |                                    |             |         |
| Ireland                     | 5                 |                                    |             |         |
| Date of data                |                   |                                    |             |         |
| <2008                       | 5                 | 98.64%                             | 0.064244    | p=0.664 |
| $\geq 2008$                 | 10                |                                    |             |         |
| Sample size                 |                   |                                    |             |         |
| <100,000                    | 2                 | 98.45%                             | 0.0871454   | p=0.268 |
| 100,001-200,000             | 1                 |                                    |             |         |
| 200,001-1,000,000           | 10                |                                    |             |         |
| >1,000,000                  | 2                 |                                    |             |         |

## (iv) Sensitivity analysis

| Lowest vs. Highest                                        | OR   | 95% CI      |                       |
|-----------------------------------------------------------|------|-------------|-----------------------|
| Overall effect size                                       | 1.61 | (1.37-1.88) | Significant increase  |
| Excluding ONS 1990-2001 (Partly skilled/unskilled manual) | 1.61 | (1.34-1.94) |                       |
| Excluding ONS 2002-2017 (Routine and manual)              | 1.63 | (1.36-1.96) |                       |
| Excluding NPRS 2000-2006 (SEG-D)                          | 1.65 | (1.38-1.97) |                       |
| Excluding NPRS 2000-2006 (Farmers)                        | 1.64 | (1.37-1.96) |                       |
| Excluding NPRS 2000-2006 (Unemployed)                     | 1.57 | (1.32-1.86) |                       |
| Excluding NRS 1990-2000 (Partly skilled/unskilled manual) | 1.65 | (1.39-1.97) |                       |
| Excluding NRS 2001-2018 (Routine and manual)              | 1.71 | (1.41-2.07) | Strongest association |
| Excluding NRS 2001-2018 (Never worked/unemployed)         | 1.50 | (1.35-1.67) | Weakest association   |
| Excluding Tuthill et al. 1999 (manual occupations)        | 1.58 | (1.32-1.88) |                       |

| Intermediate vs. Highest                           | OR   | 95% CI      |                       |
|----------------------------------------------------|------|-------------|-----------------------|
| Overall effect size                                | 1.15 | (1.06-1.25) | Significant increase  |
| Excluding ONS 1990-2001 (Intermediate occupations) | 1.12 | (1.04-1.20) | Weakest association   |
| Excluding ONS 2002-2017 (Intermediate occupations) | 1.14 | (1.03-1.27) |                       |
| Excluding NRS 1990-2000 (Intermediate occupations) | 1.13 | (1.02-1.25) |                       |
| Excluding NRS 2001-2018 (Intermediate occupations) | 1.16 | (1.05-1.28) |                       |
| Excluding NPRS 2000-2006 (SEG-B)                   | 1.19 | (1.11-1.27) | Strongest association |
| Excluding NPRS 2000-2006 (SEG-C)                   | 1.15 | (1.04-1.28) |                       |

| Pooled                                                    | OR   | 95% CI      |                      |
|-----------------------------------------------------------|------|-------------|----------------------|
| Overall effect size                                       | 1.40 | (1.23-1.59) | Significant increase |
| Excluding ONS 1990-2001 (Partly skilled/unskilled manual) | 1.38 | (1.20-1.59) |                      |
| Excluding ONS 2002-2017 (Routine and manual)              | 1.39 | (1.21-1.61) |                      |
| Excluding NPRS 2000-2006 (SEG-D)                          | 1.40 | (1.22-1.62) |                      |
| Excluding NPRS 2000-2006 (Farmers)                        | 1.40 | (1.22-1.61) |                      |
| Excluding NPRS 2000-2006 (Unemployed)                     | 1.36 | (1.20-1.55) | Weakest association  |
| Excluding NRS 1990-2000 (Partly skilled/unskilled manual) | 1.41 | (1.22-1.62) |                      |

|                                                    |      |             |                       |
|----------------------------------------------------|------|-------------|-----------------------|
| Excluding NRS 2001-2018 (Routine and manual)       | 1.41 | (1.21-1.65) |                       |
| Excluding NRS 2001-2018 (Never worked/unemployed)  | 1.33 | (1.21-1.48) |                       |
| Excluding Tuthill et al. 1999 (manual occupations) | 1.37 | (1.20-1.56) |                       |
| Excluding ONS 1990-2001 (Intermediate occupations) | 1.40 | (1.22-1.62) |                       |
| Excluding ONS 2002-2017 (Intermediate occupations) | 1.42 | (1.23-1.63) |                       |
| Excluding NRS 1990-2000 (Intermediate occupations) | 1.41 | (1.23-1.62) |                       |
| Excluding NRS 2001-2018 (Intermediate occupations) | 1.42 | (1.24-1.63) |                       |
| Excluding NPRS 2000-2006 (SEG-B)                   | 1.43 | (1.26-1.63) | Strongest association |
| Excluding NPRS 2000-2006 (SEG-C)                   | 1.42 | (1.24-1.63) |                       |

B. Perinatal mortality

(i) Funnel plots

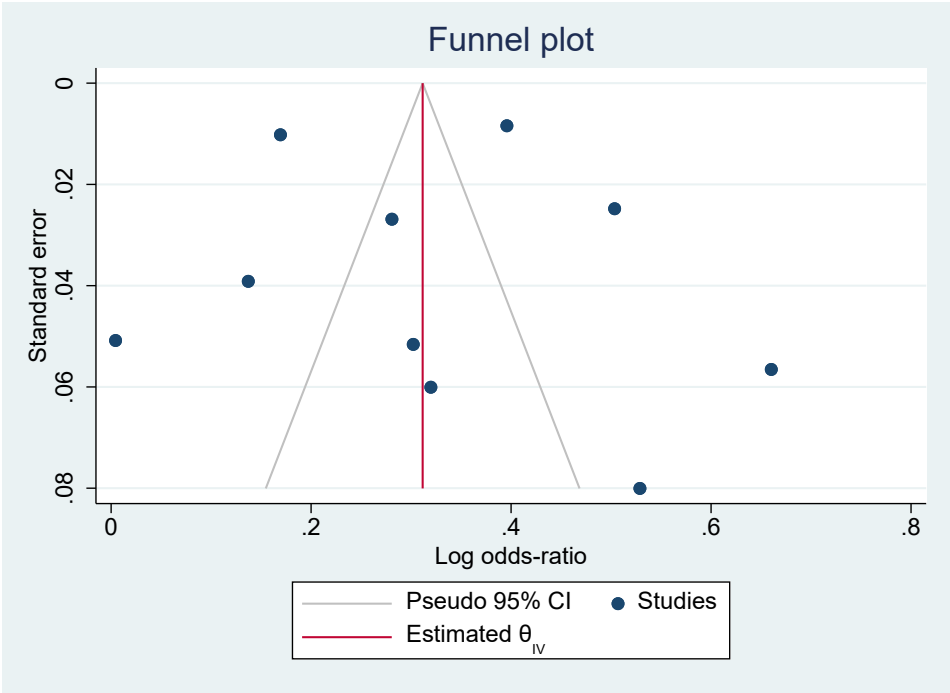

(ii) Eggers test of publication bias

H0: beta1 = 0; no small-study effects

beta1 = 1.99  
SE of beta1 = 2.944  
z = 0.68  
Prob > |z| = 0.4988

(iii) Meta regression

| Variable                                                                      | Number of studies | Meta-regression residual $I^2$ (%) | Coefficient | P value |
|-------------------------------------------------------------------------------|-------------------|------------------------------------|-------------|---------|
| All studies                                                                   | 10                |                                    |             |         |
| Duration of data collection<br>≥10 years<br><10 years                         | 4<br>6            | 98.90%                             | 0.0159509   | p=0.905 |
| Country<br>UK<br>Ireland                                                      | 5<br>5            | 98.83%                             | -0.0885106  | p=0.489 |
| Date of data<br><2008<br>≥2008                                                | 8<br>2            | 98.76%                             | 0.0571051   | p=0.723 |
| Sample size<br><100,000<br>100,001-200,000<br>200,001-1,000,000<br>>1,000,000 | 2<br>1<br>5<br>2  | 98.52%                             | 0.0764471   | p=0.200 |

## (iv) Sensitivity analysis

| Lowest vs. Highest                                        | OR          | 95% CI             |                       |
|-----------------------------------------------------------|-------------|--------------------|-----------------------|
| Overall effect size                                       | <b>1.57</b> | <b>(1.41-1.74)</b> | Significant increase  |
| Excluding ONS 1990-2001 (Partly skilled/unskilled manual) | 1.55        | (1.36-1.77)        | Weakest association   |
| Excluding ONS 2002-2017 (Routine and manual)              | 1.59        | (1.39-1.81)        |                       |
| Excluding NPRS 2000-2006 (SEG-D)                          | 1.61        | (1.44-1.80)        | Strongest association |
| Excluding NPRS 2000-2006 (Farmers)                        | 1.60        | (1.43-1.80)        |                       |
| Excluding NPRS 2000-2006 (Unemployed)                     | 1.50        | (1.38-1.64)        |                       |
| Excluding Tuthill et al. 1999 (Manual occupations)        | 1.55        | (1.37-1.75)        |                       |

| Intermediate vs. Highest                           | OR          | 95% CI             |                        |
|----------------------------------------------------|-------------|--------------------|------------------------|
| Overall effect size                                | <b>1.17</b> | <b>(1.05-1.30)</b> | Significant increase   |
| Excluding ONS 1990-2001 (Intermediate occupations) | 1.12        | (1.02-1.23)        | Weakest association    |
| Excluding ONS 2002-2017 (Intermediate occupations) | <b>1.16</b> | <b>(0.99-1.35)</b> | Change in significance |
| Excluding NPRS 2000-2006 (SEG-B)                   | 1.22        | (1.12-1.32)        | Strongest association  |
| Excluding NPRS 2000-2006 (SEG-C)                   | 1.17        | (1.01-1.36)        |                        |

| Pooled                                                    | OR          | 95% CI             |                      |
|-----------------------------------------------------------|-------------|--------------------|----------------------|
| Overall effect size                                       | <b>1.39</b> | <b>(1.23-1.57)</b> | Significant increase |
| Excluding ONS 1990-2001 (Partly skilled/unskilled manual) | 1.36        | (1.19-1.55)        | Weakest association  |
| Excluding ONS 2002-2017 (Routine and manual)              | 1.38        | (1.20-1.58)        |                      |
| Excluding NPRS 2000-2006 (SEG-D)                          | 1.39        | (1.21-1.59)        |                      |
| Excluding NPRS 2000-2006 (Farmers)                        | 1.39        | (1.21-1.59)        |                      |
| Excluding NPRS 2000-2006 (Unemployed)                     | 1.34        | (1.20-1.49)        |                      |
| Excluding Tuthill et al. 1999 (Manual occupations)        | 1.36        | (1.20-1.54)        |                      |
| Excluding ONS 1990-2001 (Intermediate occupations)        | 1.39        | (1.22-1.60)        |                      |
| Excluding ONS 2002-2017 (Intermediate occupations)        | 1.41        | (1.24-1.61)        |                      |

|                                  |      |             |                       |
|----------------------------------|------|-------------|-----------------------|
| Excluding NPRS 2000-2006 (SEG-B) | 1.43 | (1.29-1.60) | Strongest association |
| Excluding NPRS 2000-2006 (SEG-C) | 1.42 | (1.23-1.57) |                       |

C. Neonatal mortality

(i) Funnel plots

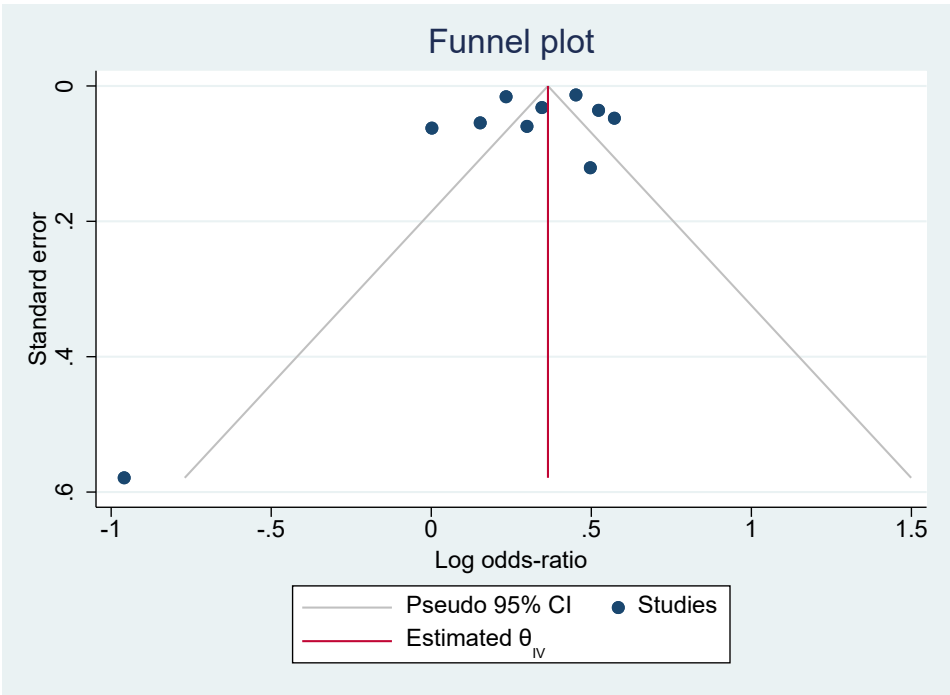

(ii) Eggers test of publication bias

H0:  $\beta_1 = 0$ ; no small-study effects  
 $\beta_1 = -1.97$   
SE of  $\beta_1 = 1.025$   
 $z = -1.92$   
 $\text{Prob} > |z| = 0.0553$

(iii) Meta regression

| Variable          | Number of studies | Meta-regression residual $I^2$ (%) | Coefficient | P value |
|-------------------|-------------------|------------------------------------|-------------|---------|
| All studies       | 10                |                                    |             |         |
| Region            |                   |                                    |             |         |
| England and Wales | 5                 | 97.11%                             | 0.1740229   | p=0.169 |
| Scotland          | 5                 |                                    |             |         |

| Variable                                                                      | Number of studies | Meta-regression residual $I^2$ (%) | Coefficient | P value |
|-------------------------------------------------------------------------------|-------------------|------------------------------------|-------------|---------|
| All studies                                                                   | 10                |                                    |             |         |
| Date of data<br><2008<br>≥2008                                                | 5<br>5            | 97.36%                             | 0.0747126   | p=0.586 |
| Sample size<br><100,000<br>100,001-200,000<br>200,001-1,000,000<br>>1,000,000 | 2<br>1<br>5<br>2  | 96.89%                             | 0.0672948   | p=0.275 |

## (iv) Sensitivity analysis

| Lowest vs. Highest                                        | OR          | 95% CI             |                       |
|-----------------------------------------------------------|-------------|--------------------|-----------------------|
| Overall effect size                                       | <b>1.58</b> | <b>(1.44-1.74)</b> | Significant increase  |
| Excluding ONS 1990-2001 (Partly skilled/unskilled manual) | 1.55        | (1.37-1.75)        |                       |
| Excluding ONS 2002-2017 (Routine and manual)              | 1.58        | (1.38-1.80)        |                       |
| Excluding NRS 1990-2000 (Partly skilled/unskilled manual) | 1.65        | (1.54-1.75)        | Strongest association |
| Excluding NRS 2001-2018 (Routine and manual)              | 1.54        | (1.39-1.70)        | Weakest association   |
| Excluding NRS 2001-2018 (Never worked/unemployed)         | 1.60        | (1.46-1.75)        |                       |
| Excluding Tuthill et al. 1999 (Manual occupations)        | 1.57        | (1.41-1.76)        |                       |

| Intermediate vs. Highest                           | OR          | 95% CI             |                        |
|----------------------------------------------------|-------------|--------------------|------------------------|
| Overall effect size                                | <b>1.21</b> | <b>(1.05-1.39)</b> | Significant increase   |
| Excluding ONS 1990-2001 (Intermediate occupations) | 1.15        | (1.01-1.31)        | Weakest association    |
| Excluding ONS 2002-2017 (Intermediate occupations) | <b>1.19</b> | <b>(0.98-1.45)</b> | Change in significance |
| Excluding NRS 1990-2000 (Intermediate occupations) | 1.22        | (1.01-1.48)        |                        |
| Excluding NRS 2001-2018 (Intermediate occupations) | 1.28        | (1.16-1.42)        | Strongest association  |

| Pooled                                                    | OR          | 95% CI             |                       |
|-----------------------------------------------------------|-------------|--------------------|-----------------------|
| Overall effect size                                       | <b>1.38</b> | <b>(1.22-1.57)</b> | Significant increase  |
| Excluding ONS 1990-2001 (Partly skilled/unskilled manual) | 1.35        | (1.18-1.54)        |                       |
| Excluding ONS 2002-2017 (Routine and manual)              | 1.36        | (1.18-1.56)        |                       |
| Excluding NRS 1990-2000 (Partly skilled/unskilled manual) | 1.39        | (1.20-1.60)        |                       |
| Excluding NRS 2001-2018 (Routine and manual)              | 1.34        | (1.19-1.52)        | Weakest association   |
| Excluding NRS 2001-2018 (Never worked/unemployed)         | 1.40        | (1.24-1.59)        |                       |
| Excluding Tuthill et al. 1999 (Manual occupations)        | 1.36        | (1.19-1.56)        |                       |
| Excluding ONS 1990-2001 (Intermediate occupations)        | 1.38        | (1.19-1.59)        |                       |
| Excluding ONS 2002-2017 (Intermediate occupations)        | 1.40        | (1.22-1.61)        |                       |
| Excluding NRS 1990-2000 (Intermediate occupations)        | 1.41        | (1.24-1.61)        |                       |
| Excluding NRS 2001-2018 (Intermediate occupations)        | 1.45        | (1.30-1.61)        | Strongest association |

## D. Very low birthweight

## (i) Funnel plots

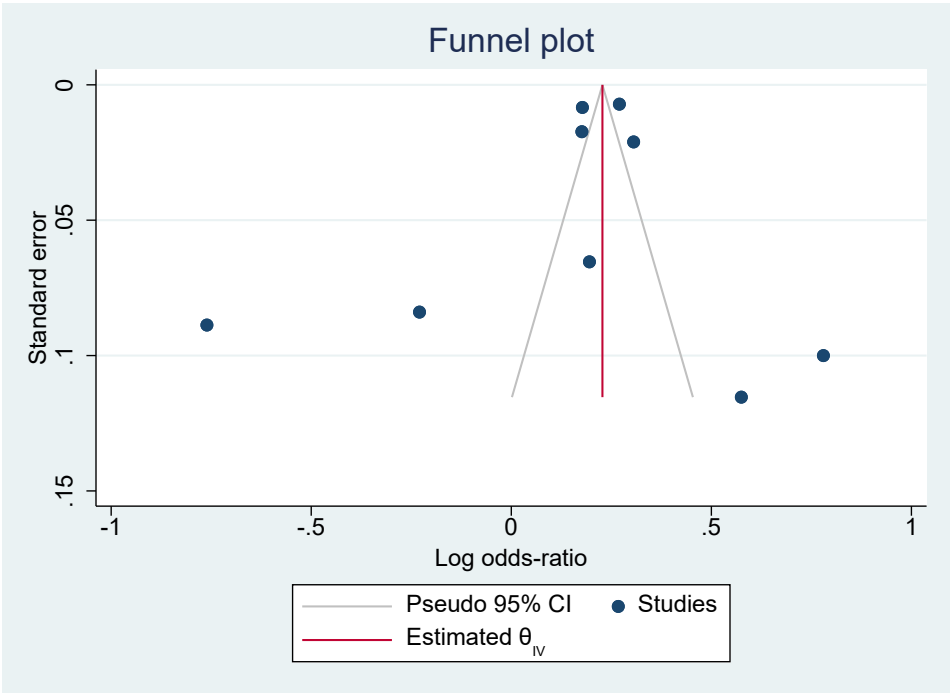

(ii) Eggers test of publication bias

H0:  $\beta_1 = 0$ ; no small-study effects  
 $\beta_1 = -0.13$   
SE of  $\beta_1 = 3.857$   
 $z = -0.03$   
Prob >  $|z| = 0.9722$

(iii) Meta regression

| Variable          | Number of studies | Meta-regression residual $I^2$ (%) | Coefficient | P value |
|-------------------|-------------------|------------------------------------|-------------|---------|
| All studies       | 9                 |                                    |             |         |
| Region            |                   |                                    |             |         |
| England and Wales | 4                 | 99.87%                             | 0.1239938   | p=0.689 |
| Ireland           | 5                 |                                    |             |         |
| Date of data      |                   |                                    |             |         |
| <2008             | 2                 | 99.84%                             | -0.0765068  | p=0.837 |
| ≥2008             | 7                 |                                    |             |         |
| Sample size       |                   |                                    |             |         |
| <50,000           | 2                 | 99.86%                             | 0.048005    | p=0.718 |
| 50,001-200,000    | 3                 |                                    |             |         |
| 200,001-1,000,000 | 1                 |                                    |             |         |
| >1,000,000        | 3                 |                                    |             |         |

(iv) Sensitivity analysis

| Lowest vs. Highest                              |             |                    |                                                     |
|-------------------------------------------------|-------------|--------------------|-----------------------------------------------------|
|                                                 | OR          | 95% CI             |                                                     |
| <b>Overall effect size</b>                      | <b>1.26</b> | <b>(0.75-2.12)</b> | <b>Non-significant increase</b>                     |
| ONS 1990-2001 (Partly skilled/unskilled manual) | 1.24        | (0.63-2.42)        |                                                     |
| ONS 2002-2017 (Routine and manual)              | 1.25        | (0.64-2.44)        |                                                     |
| <b>Excluding NPRS 2000-2006 (SEG-D)</b>         | <b>1.59</b> | <b>(1.26-2.01)</b> | <b>Strongest association change in significance</b> |
| Excluding NPRS 2000-2006 (Farmers)              | 1.16        | (0.62-2.18)        |                                                     |
| Excluding NPRS 2000-2006 (Unemployed)           | 1.10        | (0.62-1.95)        | <b>Weakest association</b>                          |

| Intermediate vs. Highest                           |             |                    |                                                     |
|----------------------------------------------------|-------------|--------------------|-----------------------------------------------------|
|                                                    | OR          | 95% CI             |                                                     |
| <b>Overall effect size</b>                         | <b>1.09</b> | <b>(0.91-1.32)</b> | <b>Non-significant increase</b>                     |
| Excluding ONS 1990-2001 (Intermediate occupations) | 1.06        | (0.81-1.38)        | <b>Weakest association</b>                          |
| Excluding ONS 2002-2017 (Intermediate occupations) | 1.06        | (0.81-1.37)        |                                                     |
| <b>Excluding NPRS 2000-2006 (SEG-B)</b>            | <b>1.19</b> | <b>(1.18-1.21)</b> | <b>Strongest association change in significance</b> |
| Excluding NPRS 2000-2006 (SEG-C)                   | 1.05        | (0.82-1.36)        |                                                     |

| Pooled                                             |             |                    |                                                     |
|----------------------------------------------------|-------------|--------------------|-----------------------------------------------------|
|                                                    | OR          | 95% CI             |                                                     |
| <b>Overall effect size</b>                         | <b>1.18</b> | <b>(0.89-1.57)</b> | <b>Non-significant increase</b>                     |
| ONS 1990-2001 (Partly skilled/unskilled manual)    | 1.16        | (0.84-1.60)        |                                                     |
| ONS 2002-2017 (Routine and manual)                 | 1.16        | (0.84-1.61)        |                                                     |
| <b>Excluding NPRS 2000-2006 (SEG-D)</b>            | <b>1.32</b> | <b>(1.08-1.60)</b> | <b>Strongest association change in significance</b> |
| Excluding NPRS 2000-2006 (Farmers)                 | 1.12        | (0.83-1.52)        |                                                     |
| Excluding NPRS 2000-2006 (Unemployed)              | 1.09        | (0.83-1.44)        | <b>Weakest association</b>                          |
| Excluding ONS 1990-2001 (Intermediate occupations) | 1.18        | (0.85-1.63)        |                                                     |
| Excluding ONS 2002-2017 (Intermediate occupations) | 1.18        | (0.85-1.63)        |                                                     |
| <b>Excluding NPRS 2000-2006 (SEG-B)</b>            | <b>1.24</b> | <b>(0.91-1.68)</b> |                                                     |
| Excluding NPRS 2000-2006 (SEG-C)                   | 1.17        | (0.85-1.62)        |                                                     |

## E. Low birthweight

### (i) Funnel plots

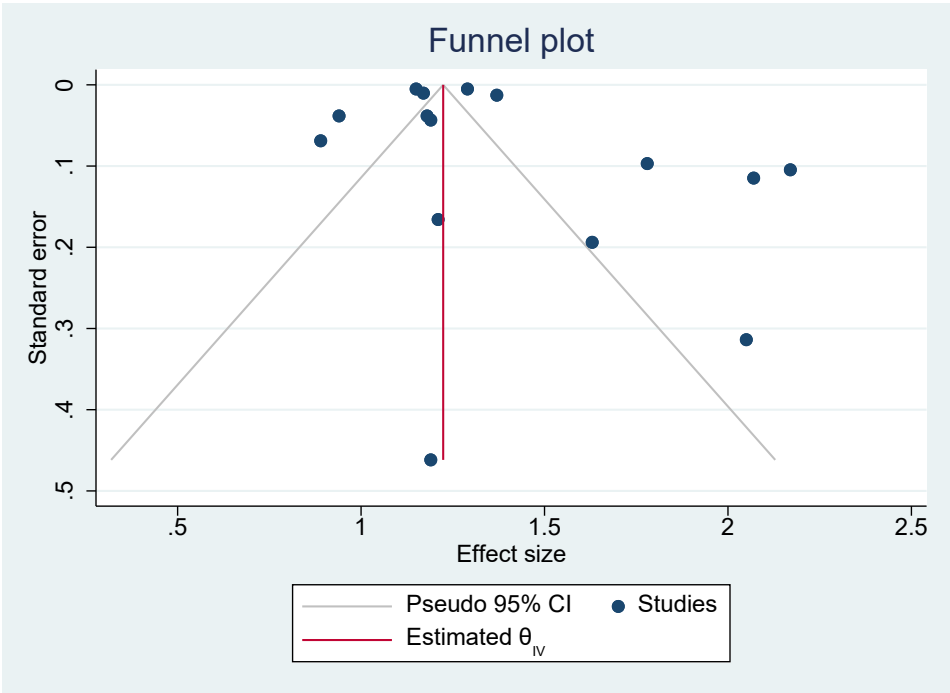

(ii) Eggers test of publication bias

H0:  $\beta_1 = 0$ ; no small-study effects  
 $\beta_1 = 1.49$   
SE of  $\beta_1 = 1.007$   
 $z = 1.48$   
Prob >  $|z| = 0.1377$

(iii) Meta regression

| Variable          | Number of studies | Meta-regression residual $I^2$ (%) | Coefficient | P value |
|-------------------|-------------------|------------------------------------|-------------|---------|
| All studies       | 15                |                                    |             |         |
| Country           |                   |                                    |             |         |
| England and Wales | 4                 | 99.81%                             | -0.3516972  | p=0.013 |
| Scotland          | 2                 |                                    |             |         |
| Ireland           | 9                 |                                    |             |         |
| Date of data      |                   |                                    |             |         |
| <2008             | 13                | 99.84%                             | 0.2149837   | p=0.486 |
| ≥2008             | 2                 |                                    |             |         |
| Sample size       |                   |                                    |             |         |
| <20,000           | 4                 | 99.85%                             | 0.0850589   | p=0.245 |
| 20,001-100,000    | 6                 |                                    |             |         |
| 100,001-200,000   | 1                 |                                    |             |         |
| 200,001-1,000,000 | 1                 |                                    |             |         |

| Variable                           | Number of studies | Meta-regression residual $I^2$ (%) | Coefficient | P value |
|------------------------------------|-------------------|------------------------------------|-------------|---------|
| All studies                        | 15                |                                    |             |         |
| >1,000,000                         | 3                 |                                    |             |         |
| <b>Duration of data collection</b> |                   |                                    |             |         |
| ≥10 years                          | 4                 | 99.86%                             | -0.2243581  | p=0.342 |
| <10 years                          | 11                |                                    |             |         |

## (iv) Sensitivity analysis

| Lowest vs. Highest                                                |             |                    |                              |
|-------------------------------------------------------------------|-------------|--------------------|------------------------------|
|                                                                   | OR          | 95% CI             |                              |
| <b>Overall effect size</b>                                        | <b>1.55</b> | <b>(1.24-1.86)</b> | <b>Significant increase</b>  |
| Excluding ONS 1990-2001 (Partly skilled/unskilled manual)         | 1.58        | (1.22-1.93)        |                              |
| Excluding data set 2 Excluding ONS 2002-2017 (Routine and manual) | 1.59        | (1.24-1.94)        |                              |
| Excluding NPRS 2000-2006 (SEG-D)                                  | 1.60        | (1.26-1.94)        |                              |
| Excluding NPRS 2000-2006 (Farmers)                                | 1.64        | (1.35-1.94)        | <b>Strongest association</b> |
| Excluding NPRS 2000-2006 (Unemployes)                             | 1.52        | (1.17-1.87)        |                              |
| Excluding McAvoy et al. 2006 (SEG-D)                              | 1.51        | (1.18-1.83)        |                              |
| Excluding McAvoy et al. 2006 (Farmers)                            | 1.58        | (1.25-1.91)        |                              |
| Excluding Fairley & Leyland 2006 (Unskilled)                      | 1.48        | (1.16-1.80)        |                              |
| Excluding Fairley & Leyland 2006 (Semi-skilled)                   | 1.46        | (1.16-1.77)        | <b>Weakest association</b>   |

| Intermediate vs. Highest                                  |             |                    |                               |
|-----------------------------------------------------------|-------------|--------------------|-------------------------------|
|                                                           | OR          | 95% CI             |                               |
| <b>Overall effect size</b>                                | <b>1.16</b> | <b>(1.04-1.28)</b> | <b>Significant reduction</b>  |
| <b>Excluding ONS 1990-2001 (Intermediate occupations)</b> | <b>1.17</b> | <b>(0.99-1.34)</b> | <b>Change in significance</b> |
| Excluding ONS 2002-2017 (Intermediate occupations)        | 1.17        | (1.00-1.35)        | <b>Strongest association</b>  |
| <b>Excluding NPRS 2000-2006 (SEG-C)</b>                   | <b>1.16</b> | <b>(0.99-1.33)</b> | <b>Change in significance</b> |
| Excluding NPRS 2000-2006 (SEG-B)                          | 1.16        | (1.14-1.18)        |                               |
| Excluding McAvoy et al. 2006 (SEG-C)                      | 1.12        | (1.02-1.22)        | <b>Weakest association</b>    |
| Excluding McAvoy et al. 2006 (SEG-B)                      | 1.16        | (1.02-1.30)        |                               |

| Pooled                                                            |             |                    |                              |
|-------------------------------------------------------------------|-------------|--------------------|------------------------------|
|                                                                   | OR          | 95% CI             |                              |
| <b>Overall effect size</b>                                        | <b>1.40</b> | <b>(1.19-1.61)</b> | <b>Significant increase</b>  |
| Excluding ONS 1990-2001 (Intermediate occupations)                | 1.41        | (1.18-1.63)        |                              |
| Excluding ONS 2002-2017 (Intermediate occupations)                | 1.41        | (1.19-1.64)        |                              |
| Excluding NPRS 2000-2006 (SEG-C)                                  | 1.42        | (1.19-1.64)        |                              |
| Excluding NPRS 2000-2006 (SEG-B)                                  | 1.44        | (1.23-1.65)        |                              |
| Excluding McAvoy et al. 2006 (SEG-C)                              | 1.37        | (1.16-1.59)        |                              |
| Excluding McAvoy et al. 2006 (SEG-B)                              | 1.37        | (1.16-1.58)        |                              |
| Excluding ONS 1990-2001 (Partly skilled/unskilled manual)         | 1.41        | (1.19-1.63)        |                              |
| Excluding data set 2 Excluding ONS 2002-2017 (Routine and manual) | 1.35        | (1.15-1.55)        |                              |
| Excluding NPRS 2000-2006 (SEG-D)                                  | 1.34        | (1.15-1.53)        | <b>Weakest association</b>   |
| Excluding NPRS 2000-2006 (Farmers)                                | 1.42        | (1.20-1.65)        |                              |
| Excluding NPRS 2000-2006 (Unemployes)                             | 1.42        | (1.20-1.65)        |                              |
| Excluding McAvoy et al. 2006 (SEG-D)                              | 1.42        | (1.20-1.65)        |                              |
| Excluding McAvoy et al. 2006 (Farmers)                            | 1.44        | (1.22-1.65)        | <b>Strongest association</b> |
| Excluding Fairley & Leyland 2006 (Unskilled)                      | 1.39        | (1.17-1.61)        |                              |
| Excluding Fairley & Leyland 2006 (Semi-skilled)                   | 1.42        | (1.19-1.64)        |                              |

F    **Macrosomia**

(i)    Funnel plots

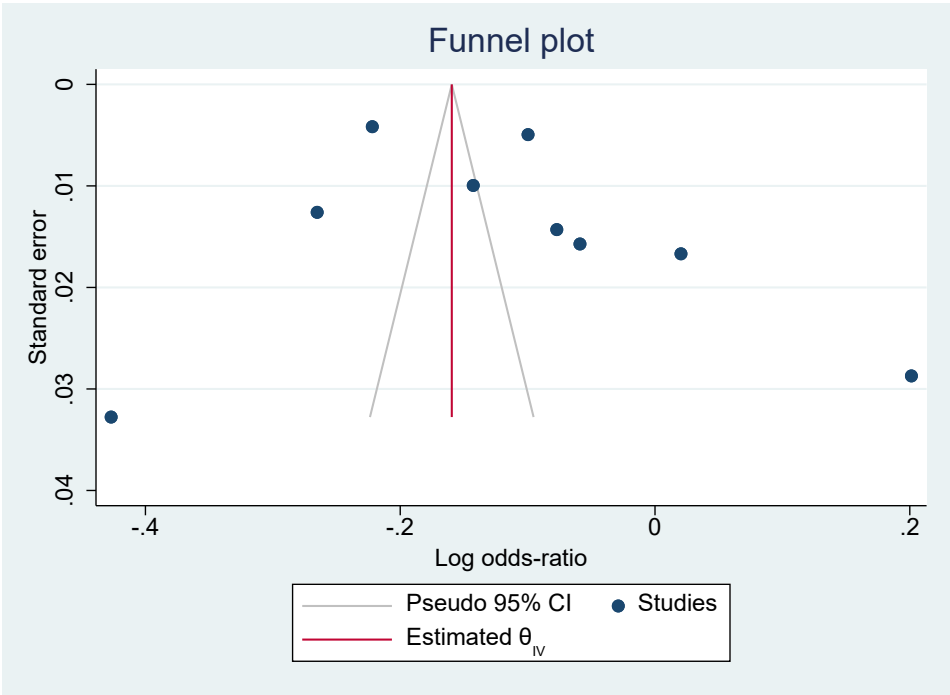

(ii)    Eggers test of publication bias

H0:  $\beta_1 = 0$ ; no small-study effects  
 $\beta_1 = 0.83$   
SE of  $\beta_1 = 6.880$   
 $z = 0.12$   
 $\text{Prob} > |z| = 0.9035$

(iii)    Meta regression

| Variable          | Number of studies | Meta-regression residual $I^2$ (%) | Coefficient | P value |
|-------------------|-------------------|------------------------------------|-------------|---------|
| All studies       | 9                 |                                    |             |         |
| Region            |                   |                                    |             |         |
| England and Wales | 4                 | 99.72%                             | -0.1149132  | p=0.332 |
| Ireland           | 5                 |                                    |             |         |
| Date of data      |                   |                                    |             |         |
| <2008             | 4                 | 99.72%                             | 0.540361    | p=0.717 |
| ≥2008             | 5                 |                                    |             |         |

| Variable          | Number of studies | Meta-regression residual $I^2$ (%) | Coefficient | P value |
|-------------------|-------------------|------------------------------------|-------------|---------|
| All studies       | 9                 |                                    |             |         |
| Sample size       |                   |                                    |             |         |
| <100,000          | 3                 | 99.72%                             | 0.411906    | p=0.429 |
| 100,001-200,000   | 2                 |                                    |             |         |
| 200,001-1,000,000 | 2                 |                                    |             |         |
| >1,000,000        | 2                 |                                    |             |         |

## (iv) Sensitivity analysis

|                                                           |      |             |                                              |
|-----------------------------------------------------------|------|-------------|----------------------------------------------|
| Lowest vs. Highest                                        |      |             |                                              |
|                                                           | OR   | 95% CI      |                                              |
| Overall effect size                                       | 0.86 | (0.70-1.05) | Non-significant reduction                    |
| Excluding ONS 1990-2001 (Partly skilled/unskilled manual) | 0.88 | (0.68-1.14) |                                              |
| Excluding ONS 2002-2017 (Routine and manual)              | 0.87 | (0.67-1.14) |                                              |
| Excluding NPRS 2000-2006 (SEG-D)                          | 0.84 | (0.64-1.09) |                                              |
| Excluding NPRS 2000-2006 (Farmers)                        | 0.78 | (0.68-0.91) | Strongest association change in significance |
| Excluding NPRS 2000-2006 (Unemployed)                     | 0.92 | (0.75-1.13) | Weakest association                          |

|                                                    |      |             |                                            |
|----------------------------------------------------|------|-------------|--------------------------------------------|
| Intermediate vs. Highest                           |      |             |                                            |
|                                                    | OR   | 95% CI      |                                            |
| Overall effect size                                | 0.93 | (0.87-0.99) | Significant reduction                      |
| Excluding ONS 1990-2001 (Intermediate occupations) | 0.95 | (0.88-1.02) | Weakest association change in significance |
| Excluding ONS 2002-2017 (Intermediate occupations) | 0.93 | (0.85-1.03) | Change in significance                     |
| Excluding NPRS 2000-2006 (SEG-C)                   | 0.93 | (0.84-1.02) | Change in significance                     |
| Excluding NPRS 2000-2006 (SEG-B)                   | 0.90 | (0.87-0.93) | Strongest association                      |

|                                                           |      |             |                                            |
|-----------------------------------------------------------|------|-------------|--------------------------------------------|
| Pooled                                                    |      |             |                                            |
|                                                           | OR   | 95% CI      |                                            |
| Overall effect size                                       | 0.89 | (0.79-0.99) | Significant reduction                      |
| Excluding ONS 1990-2001 (Partly skilled/unskilled manual) | 0.90 | (0.80-1.02) | Change in significance                     |
| Excluding ONS 2002-2017 (Routine and manual)              | 0.90 | (0.79-1.02) | Change in significance                     |
| Excluding NPRS 2000-2006 (SEG-D)                          | 0.88 | (0.77-1.00) | Change in significance                     |
| Excluding NPRS 2000-2006 (Farmers)                        | 0.85 | (0.78-0.94) | Strongest association                      |
| Excluding NPRS 2000-2006 (Unemployed)                     | 0.92 | (0.83-1.03) | Weakest association change in significance |
| Excluding ONS 1990-2001 (Intermediate occupations)        | 0.89 | (0.78-1.01) | Change in significance                     |
| Excluding ONS 2002-2017 (Intermediate occupations)        | 0.89 | (0.78-1.01) | Change in significance                     |
| Excluding NPRS 2000-2006 (SEG-C)                          | 0.88 | (0.77-1.01) | Change in significance                     |
| Excluding NPRS 2000-2006 (SEG-B)                          | 0.87 | (0.77-0.99) |                                            |

## G. Preterm birth

## (i) Funnel plots

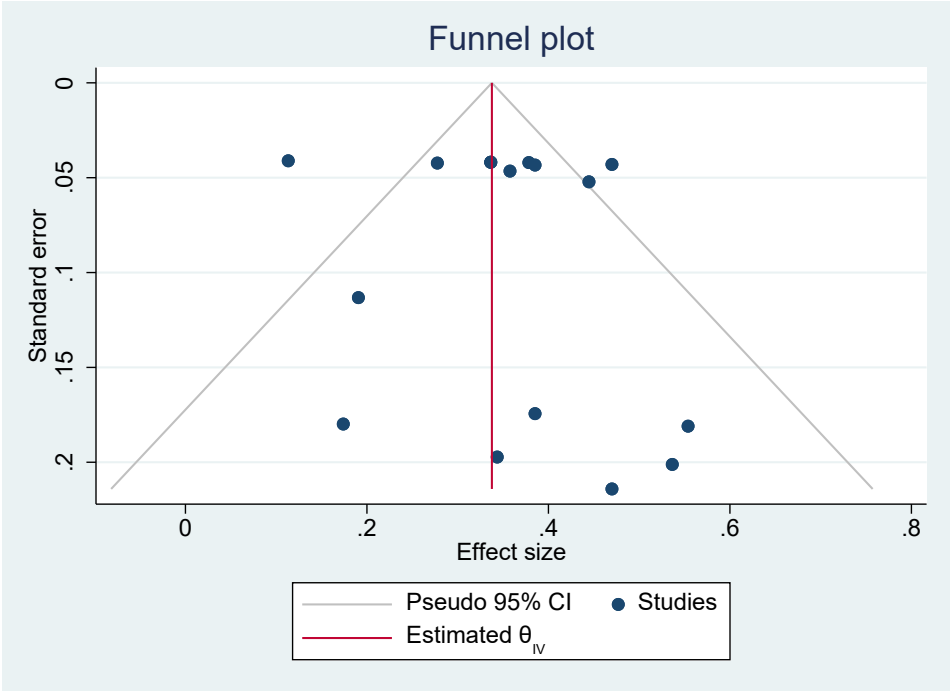

(ii) Eggers test of publication bias

H0:  $\beta_1 = 0$ ; no small-study effects  
 $\beta_1 = 0.35$   
SE of  $\beta_1 = 0.617$   
 $z = 0.56$   
 $\text{Prob} > |z| = 0.5728$

(iii) Meta regression

| Variable                                                            | Number of studies | Meta-regression residual $I^2$ (%) | Coefficient | P value |
|---------------------------------------------------------------------|-------------------|------------------------------------|-------------|---------|
| All studies                                                         | 16                |                                    |             |         |
| Date of data<br><2001<br>≥2001                                      | 10<br>6           | 72.67%                             | -0.0699759  | p=0.448 |
| Sample size<br><10,000<br>10,000-50,000<br>50,001-70,000<br>>70,000 | 6<br>2<br>3<br>5  | 65.32%                             | -0.0393863  | p=0.075 |

(iv) Sensitivity analysis

|                    |    |        |  |
|--------------------|----|--------|--|
| Lowest vs. Highest |    |        |  |
|                    | OR | 95% CI |  |

| Overall effect size                                        | 1.51 | (1.42-1.60) | Significant increase  |
|------------------------------------------------------------|------|-------------|-----------------------|
| Excluding Fairley & Leyland 2006 (Semi-skilled, 1990-1994) | 1.54 | (1.45-1.64) | Strongest association |
| Excluding Fairley & Leyland 2006 (Unskilled, 1990-1994)    | 1.53 | (1.42-1.65) |                       |
| Excluding Fairley & Leyland 2006 (Semi-skilled, 1995-2000) | 1.47 | (1.38-1.56) | Weakest association   |
| Excluding Fairley & Leyland 2006 (Unskilled, 1995-2000)    | 1.49 | (1.39-1.61) |                       |
| Excluding Clemens & Dibben 2017 (Partly skilled)           | 1.50 | (1.41-1.60) |                       |
| Excluding Clemens & Dibben 2017 (Unskilled)                | 1.50 | (1.41-1.60) |                       |
| Excluding Clemens & Dibben 2017 (Unemployed)               | 1.50 | (1.41-1.60) |                       |

| Intermediate vs. Highest                                           |      |             |                       |
|--------------------------------------------------------------------|------|-------------|-----------------------|
|                                                                    | OR   | 95% CI      |                       |
| Overall effect size                                                | 1.34 | (1.23-1.45) | Significant increase  |
| Excluding Fairley & Leyland 2006 (Managerial/technical, 1990-1994) | 1.40 | (1.34-1.46) | Strongest association |
| Excluding Fairley & Leyland 2006 (Skilled non-manual, 1990-1994)   | 1.32 | (1.21-1.45) |                       |
| Excluding Fairley & Leyland 2006 (Skilled manual, 1990-1994)       | 1.34 | (1.22-1.47) |                       |
| Excluding Fairley & Leyland 2006 (Managerial/technical, 1995-2000) | 1.35 | (1.24-1.47) |                       |
| Excluding Fairley & Leyland 2006 (Skilled non-manual, 1995-2000)   | 1.31 | (1.20-1.43) | Weakest association   |
| Excluding Fairley & Leyland 2006 (Skilled manual, 1995-2000)       | 1.31 | (1.20-1.43) | Weakest association   |
| Excluding Clemens & Dibben 2017 (Managerial/technical)             | 1.34 | (1.24-1.46) |                       |
| Excluding Clemens & Dibben 2017 (Skilled non-manual)               | 1.33 | (1.22-1.44) |                       |
| Excluding Clemens & Dibben 2017 (Skilled manual)                   | 1.33 | (1.23-1.45) |                       |

| Pooled                                                             |      |             |                       |
|--------------------------------------------------------------------|------|-------------|-----------------------|
|                                                                    | OR   | 95% CI      |                       |
| Overall effect size                                                | 1.41 | (1.33-1.50) | Significant increase  |
| Excluding Fairley & Leyland 2006 (Semi-skilled, 1990-1994)         | 1.41 | (1.32-1.51) |                       |
| Excluding Fairley & Leyland 2006 (Unskilled, 1990-1994)            | 1.41 | (1.32-1.50) |                       |
| Excluding Fairley & Leyland 2006 (Semi-skilled, 1995-2000)         | 1.39 | (1.31-1.48) | Weakest association   |
| Excluding Fairley & Leyland 2006 (Unskilled, 1995-2000)            | 1.40 | (1.31-1.49) |                       |
| Excluding Clemens & Dibben 2017 (Partly skilled)                   | 1.40 | (1.31-1.49) |                       |
| Excluding Clemens & Dibben 2017 (Unskilled)                        | 1.41 | (1.32-1.50) |                       |
| Excluding Clemens & Dibben 2017 (Unemployed)                       | 1.40 | (1.32-1.49) |                       |
| Excluding Fairley & Leyland 2006 (Managerial/technical, 1990-1994) | 1.44 | (1.39-1.50) | Strongest association |
| Excluding Fairley & Leyland 2006 (Skilled non-manual, 1990-1994)   | 1.41 | (1.32-1.51) |                       |
| Excluding Fairley & Leyland 2006 (Skilled manual, 1990-1994)       | 1.42 | (1.33-1.51) |                       |
| Excluding Fairley & Leyland 2006 (Managerial/technical, 1995-2000) | 1.42 | (1.34-1.51) |                       |
| Excluding Fairley & Leyland 2006 (Skilled non-manual, 1995-2000)   | 1.40 | (1.32-1.50) |                       |

|                                                              |      |             |  |
|--------------------------------------------------------------|------|-------------|--|
| Excluding Fairley & Leyland 2006 (Skilled manual, 1995-2000) | 1.41 | (1.32-1.50) |  |
| Excluding Clemens & Dibben 2017 (Managerial/technical)       | 1.42 | (1.33-1.50) |  |
| Excluding Clemens & Dibben 2017 (Skilled non-manual)         | 1.41 | (1.33-1.50) |  |
| Excluding Clemens & Dibben 2017 (Skilled manual)             | 1.41 | (1.33-1.50) |  |

H. Emergency Caesarean section

(i) Funnel plots

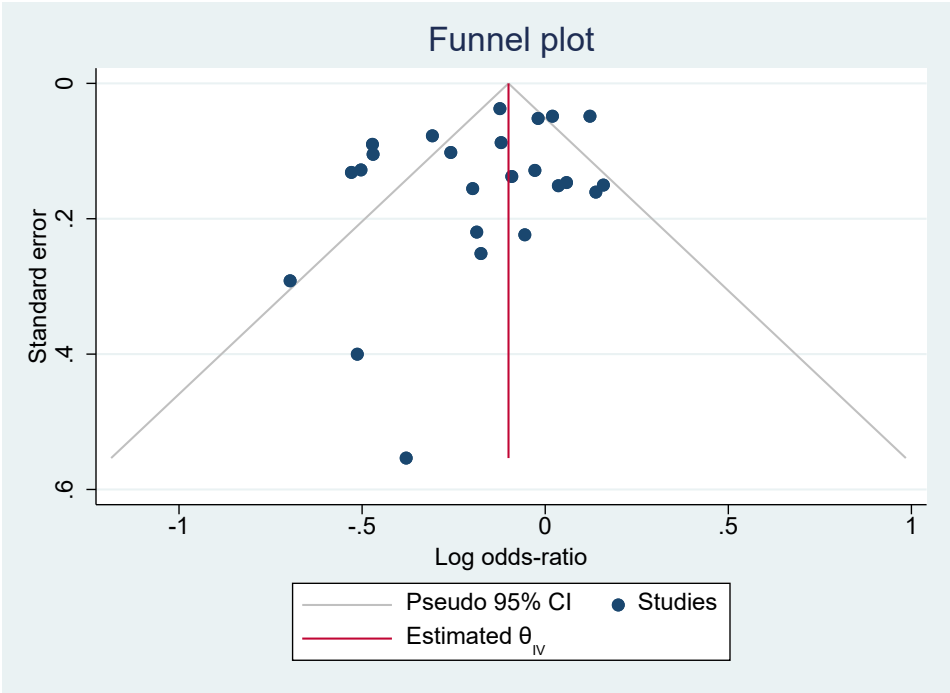

(ii) Eggers test of publication bias

H0:  $\beta_1 = 0$ ; no small-study effects  
 $\beta_1 = -0.73$   
SE of  $\beta_1 = 0.645$   
 $z = -1.13$   
 $\text{Prob} > |z| = 0.2589$

(iii) Meta regression

| Variable    | Number of studies | Meta-regression residual $I^2$ (%) | Coefficient | P value |
|-------------|-------------------|------------------------------------|-------------|---------|
| All studies | 24                |                                    |             |         |
| Region      |                   |                                    |             |         |
| UK-wide     | 12                | 81.36%                             | -0.001076   | p=0.978 |
| England     | 5                 |                                    |             |         |

| Variable                                                  | Number of studies | Meta-regression residual $I^2$ (%) | Coefficient | P value |
|-----------------------------------------------------------|-------------------|------------------------------------|-------------|---------|
| All studies                                               | 24                |                                    |             |         |
| Scotland<br>Ireland                                       | 2<br>5            |                                    |             |         |
| Date of data<br><2000<br>≥2000                            | 7<br>17           | 78.04%                             | -0.930236   | p=0.406 |
| Sample size<br><2,000<br>2,000-5,999<br>>6,000<br>Unknown | 6<br>11<br>5<br>2 | 75.66%                             | 0.1087516   | p=0.024 |

## (iv) Sensitivity analysis

| Lowest vs. Highest                                                    | OR   | 95% CI      |                       |
|-----------------------------------------------------------------------|------|-------------|-----------------------|
| Overall effect size                                                   | 0.79 | (0.68-0.92) | Significant reduction |
| Excluding Brick et al. 2016 (SEG-D)                                   | 0.79 | (0.67-0.94) |                       |
| Excluding Brick et al. 2016 (Farmers)                                 | 0.79 | (0.68-0.93) |                       |
| Excluding Brick et al. 2016 (Unemployed)                              | 0.81 | (0.69-0.95) | Weakest association   |
| Excluding Essex et al. 2013 (Lower supervisory/technical, primips)    | 0.81 | (0.69-0.95) | Weakest association   |
| Excluding Essex et al. 2013 (Semi-routine, primips)                   | 0.81 | (0.69-0.95) | Weakest association   |
| Excluding Essex et al. 2013 (Routine, primips)                        | 0.81 | (0.69-0.95) | Weakest association   |
| Excluding Essex et al. 2013 (Lower supervisory/technical, multips)    | 0.77 | (0.66-0.90) |                       |
| Excluding Essex et al. 2013 (Semi-routine, multips)                   | 0.78 | (0.66-0.92) |                       |
| Excluding Essex et al. 2013 (Routine, multips)                        | 0.77 | (0.66-0.91) |                       |
| Excluding Patel et al. 2005 (Skilled manual)                          | 0.81 | (0.69-0.94) | Weakest association   |
| Excluding Patel et al. 2005 (Partly skilled)                          | 0.79 | (0.67-0.93) |                       |
| Excluding Patel et al. 2005 (Unskilled)                               | 0.80 | (0.68-0.93) |                       |
| Excluding Fairley et al. 2011 (Bottom of social hierarchy, 1990-1991) | 0.76 | (0.65-0.89) | Strongest association |
| Excluding Fairley et al. 2011 (Bottom of social hierarchy, 1999-2000) | 0.77 | (0.65-0.90) |                       |

| Intermediate vs. Highest                                             | OR   | 95% CI      |                                            |
|----------------------------------------------------------------------|------|-------------|--------------------------------------------|
| Overall effect size                                                  | 0.91 | (0.86-0.97) | Significant reduction                      |
| Excluding Brick et al. 2016 (SEG-B)                                  | 0.89 | (0.84-0.94) | Strongest association                      |
| Excluding Brick et al. 2016 (SEG-C)                                  | 0.93 | (0.86-1.01) | Weakest association change in significance |
| Excluding Essex et al. 2013 (Lower managerial/professional, primips) | 0.92 | (0.85-0.99) |                                            |
| Excluding Essex et al. 2013 (Intermediate, primips)                  | 0.93 | (0.87-0.99) | Weakest association                        |
| Excluding Essex et al. 2013 (Small employer/self-employed, primips)  | 0.92 | (0.86-0.98) |                                            |
| Excluding Essex et al. 2013 (Lower managerial/professional, multips) | 0.91 | (0.85-0.97) |                                            |
| Excluding Essex et al. 2013 (Intermediate, multips)                  | 0.91 | (0.85-0.97) |                                            |

|                                                                     |      |             |  |
|---------------------------------------------------------------------|------|-------------|--|
| Excluding Essex et al. 2013 (Small employer/self-employed, multips) | 0.91 | (0.85-0.96) |  |
| Excluding Patel et al. 2005 (Managerial/clerical)                   | 0.91 | (0.86-0.97) |  |
| Excluding Patel et al. 2005 (Skilled non-manual)                    | 0.92 | (0.86-0.98) |  |

| <b>Pooled</b>                                                         |             |                    |                              |
|-----------------------------------------------------------------------|-------------|--------------------|------------------------------|
|                                                                       | OR          | 95% CI             |                              |
| <b>Overall effect size</b>                                            | <b>0.85</b> | <b>(0.77-0.93)</b> | <b>Significant reduction</b> |
| Excluding Brick et al. 2016 (SEG-D)                                   | 0.86        | (0.78-0.95)        |                              |
| Excluding Brick et al. 2016 (Farmers)                                 | 0.85        | (0.77-0.94)        |                              |
| Excluding Brick et al. 2016 (Unemployed)                              | 0.87        | (0.79-0.95)        | Weakest association          |
| Excluding Essex et al. 2013 (Lower supervisory/technical, primips)    | 0.87        | (0.79-0.95)        | Weakest association          |
| Excluding Essex et al. 2013 (Semi-routine, primips)                   | 0.86        | (0.79-0.95)        |                              |
| Excluding Essex et al. 2013 (Routine, primips)                        | 0.86        | (0.79-0.95)        |                              |
| Excluding Essex et al. 2013 (Lower supervisory/technical, multips)    | 0.84        | (0.76-0.92)        |                              |
| Excluding Essex et al. 2013 (Semi-routine, multips)                   | 0.85        | (0.77-0.94)        |                              |
| Excluding Essex et al. 2013 (Routine, multips)                        | 0.84        | (0.76-0.93)        |                              |
| Excluding Patel et al. 2005 (Skilled manual)                          | 0.86        | (0.78-0.94)        |                              |
| Excluding Patel et al. 2005 (Partly skilled)                          | 0.85        | (0.77-0.94)        |                              |
| Excluding Patel et al. 2005 (Unskilled)                               | 0.85        | (0.78-0.94)        |                              |
| Excluding Fairley et al. 2011 (Bottom of social hierarchy, 1990-1991) | 0.83        | (0.76-0.92)        | Strongest association        |
| Excluding Fairley et al. 2011 (Bottom of social hierarchy, 1999-2000) | 0.84        | (0.76-0.93)        |                              |
| Excluding Brick et al. 2016 (SEG-B)                                   | 0.84        | (0.76-0.93)        |                              |
| Excluding Brick et al. 2016 (SEG-C)                                   | 0.85        | (0.77-0.94)        |                              |
| Excluding Essex et al. 2013 (Lower managerial/professional, primips)  | 0.85        | (0.77-0.94)        |                              |
| Excluding Essex et al. 2013 (Intermediate, primips)                   | 0.85        | (0.77-0.94)        |                              |
| Excluding Essex et al. 2013 (Small employer/self-employed, primips)   | 0.85        | (0.77-0.94)        |                              |
| Excluding Essex et al. 2013 (Lower managerial/professional, multips)  | 0.84        | (0.77-0.93)        |                              |
| Excluding Essex et al. 2013 (Intermediate, multips)                   | 0.84        | (0.76-0.93)        |                              |
| Excluding Essex et al. 2013 (Small employer/self-employed, multips)   | 0.84        | (0.76-0.92)        |                              |
| Excluding Patel et al. 2005 (Managerial/clerical)                     | 0.85        | (0.77-0.93)        |                              |
| Excluding Patel et al. 2005 (Skilled non-manual)                      | 0.85        | (0.77-0.94)        |                              |

## I. Elective Caesarean section

### (i) Funnel plots

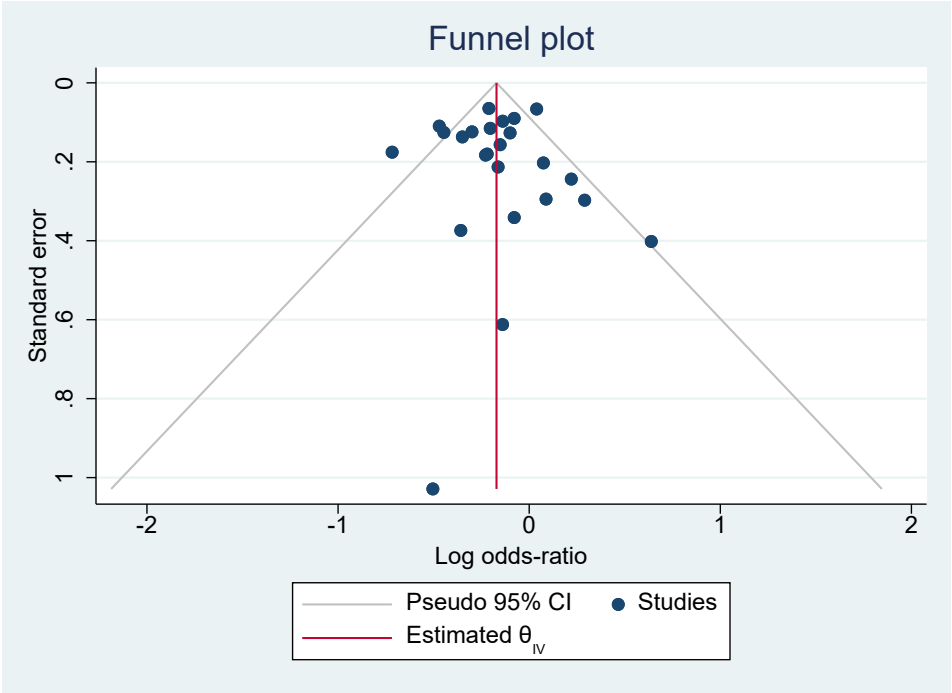

(ii) Eggers test of publication bias

H0:  $\beta_1 = 0$ ; no small-study effects  
 $\beta_1 = 0.53$   
SE of  $\beta_1 = 0.523$   
 $z = 1.01$   
 $\text{Prob} > |z| = 0.3143$

(iii) Meta regression

| Variable     | Number of studies | Meta-regression residual $I^2$ (%) | Coefficient | P value |
|--------------|-------------------|------------------------------------|-------------|---------|
| All studies  | 24                |                                    |             |         |
| Region       |                   |                                    |             |         |
| UK-wide      | 12                | 55.35%                             | -0.0127273  | p=0.734 |
| England      | 5                 |                                    |             |         |
| Scotland     | 2                 |                                    |             |         |
| Ireland      | 5                 |                                    |             |         |
| Date of data |                   |                                    |             |         |
| <2000        | 7                 | 31.46%                             | -0.293962   | p=0.004 |
| ≥2000        | 17                |                                    |             |         |
| Sample size  |                   |                                    |             |         |
| <2,000       | 6                 | 53.53%                             | 0.0038794   | p=0.948 |
| 2,000-5,999  | 13                |                                    |             |         |
| >6,000       | 3                 |                                    |             |         |
| Unknown      | 2                 |                                    |             |         |

## (iv) Sensitivity analysis

| Lowest vs. Highest                                                    |             |                    |                              |
|-----------------------------------------------------------------------|-------------|--------------------|------------------------------|
|                                                                       | OR          | 95% CI             |                              |
| <b>Overall effect size</b>                                            | <b>0.78</b> | <b>(0.67-0.91)</b> | <b>Significant reduction</b> |
| Excluding Brick et al. 2016 (SEG-D)                                   | 0.79        | (0.66-0.94)        |                              |
| Excluding Brick et al. 2016 (Farmers)                                 | 0.78        | (0.67-0.91)        |                              |
| Excluding Brick et al. 2016 (Unemployed)                              | 0.81        | (0.70-0.94)        | Weakest association          |
| Excluding Essex et al. 2013 (Lower supervisory/technical, primips)    | 0.76        | (0.65-0.89)        |                              |
| Excluding Essex et al. 2013 (Semi-routine, primips)                   | 0.78        | (0.66-0.92)        |                              |
| Excluding Essex et al. 2013 (Routine, primips)                        | 0.77        | (0.66-0.92)        |                              |
| Excluding Essex et al. 2013 (Lower supervisory/technical, multips)    | 0.79        | (0.66-0.93)        |                              |
| Excluding Essex et al. 2013 (Semi-routine, multips)                   | 0.80        | (0.68-0.95)        |                              |
| Excluding Essex et al. 2013 (Routine, multips)                        | 0.80        | (0.67-0.94)        |                              |
| Excluding Patel et al. 2005 (Skilled manual)                          | 0.78        | (0.67-0.91)        |                              |
| Excluding Patel et al. 2005 (Partly skilled)                          | 0.77        | (0.66-0.91)        |                              |
| Excluding Patel et al. 2005 (Unskilled)                               | 0.76        | (0.65-0.88)        |                              |
| Excluding Fairley et al. 2011 (Bottom of social hierarchy, 1990-1991) | 0.73        | (0.64-0.84)        | Strongest association        |
| Excluding Fairley et al. 2011 (Bottom of social hierarchy, 1999-2000) | 0.78        | (0.66-0.91)        |                              |

| Intermediate vs. Highest                                             |             |                    |                              |
|----------------------------------------------------------------------|-------------|--------------------|------------------------------|
|                                                                      | OR          | 95% CI             |                              |
| <b>Overall effect size</b>                                           | <b>0.87</b> | <b>(0.81-0.93)</b> | <b>Significant reduction</b> |
| Excluding Brick et al. 2016 (SEG-B)                                  | 0.86        | (0.79-0.93)        | Strongest association        |
| Excluding Brick et al. 2016 (SEG-C)                                  | 0.90        | (0.82-0.98)        | Weakest association          |
| Excluding Essex et al. 2013 (Lower managerial/professional, primips) | 0.87        | (0.81-0.94)        |                              |
| Excluding Essex et al. 2013 (Intermediate, primips)                  | 0.87        | (0.81-0.94)        |                              |
| Excluding Essex et al. 2013 (Small employer/self-employed, primips)  | 0.86        | (0.80-0.93)        | Strongest association        |
| Excluding Essex et al. 2013 (Lower managerial/professional, multips) | 0.87        | (0.80-0.94)        |                              |
| Excluding Essex et al. 2013 (Intermediate, multips)                  | 0.87        | (0.81-0.94)        |                              |
| Excluding Essex et al. 2013 (Small employer/self-employed, multips)  | 0.86        | (0.80-0.93)        | Strongest association        |
| Excluding Patel et al. 2005 (Managerial/clerical)                    | 0.86        | (0.80-0.93)        | Strongest association        |
| Excluding Patel et al. 2005 (Skilled non-manual)                     | 0.86        | (0.80-0.93)        | Strongest association        |

| Pooled                                                             |             |                    |                              |
|--------------------------------------------------------------------|-------------|--------------------|------------------------------|
|                                                                    | OR          | 95% CI             |                              |
| <b>Overall effect size</b>                                         | <b>0.83</b> | <b>(0.76-0.91)</b> | <b>Significant reduction</b> |
| Excluding Brick et al. 2016 (SEG-D)                                | 0.84        | (0.77-0.92)        |                              |
| Excluding Brick et al. 2016 (Farmers)                              | 0.83        | (0.76-0.91)        |                              |
| Excluding Brick et al. 2016 (Unemployed)                           | 0.85        | (0.78-0.91)        | Weakest association          |
| Excluding Essex et al. 2013 (Lower supervisory/technical, primips) | 0.83        | (0.75-0.90)        |                              |
| Excluding Essex et al. 2013 (Semi-routine, primips)                | 0.83        | (0.76-0.92)        |                              |
| Excluding Essex et al. 2013 (Routine, primips)                     | 0.83        | (0.76-0.91)        |                              |
| Excluding Essex et al. 2013 (Lower supervisory/technical, multips) | 0.84        | (0.76-0.92)        |                              |
| Excluding Essex et al. 2013 (Semi-routine, multips)                | 0.85        | (0.78-0.93)        | Weakest association          |
| Excluding Essex et al. 2013 (Routine, multips)                     | 0.85        | (0.77-0.93)        | Weakest association          |
| Excluding Patel et al. 2005 (Skilled manual)                       | 0.83        | (0.76-0.91)        |                              |
| Excluding Patel et al. 2005 (Partly skilled)                       | 0.83        | (0.76-0.91)        |                              |

|                                                                       |      |             |                       |
|-----------------------------------------------------------------------|------|-------------|-----------------------|
| Excluding Patel et al. 2005 (Unskilled)                               | 0.82 | (0.75-0.90) |                       |
| Excluding Fairley et al. 2011 (Bottom of social hierarchy, 1990-1991) | 0.81 | (0.75-0.89) | Strongest association |
| Excluding Fairley et al. 2011 (Bottom of social hierarchy, 1999-2000) | 0.83 | (0.76-0.91) |                       |
| Excluding Brick et al. 2016 (SEG-B)                                   | 0.83 | (0.75-0.91) |                       |
| Excluding Brick et al. 2016 (SEG-C)                                   | 0.84 | (0.76-0.92) |                       |
| Excluding Essex et al. 2013 (Lower managerial/professional, primips)  | 0.83 | (0.76-0.91) |                       |
| Excluding Essex et al. 2013 (Intermediate, primips)                   | 0.83 | (0.76-0.92) |                       |
| Excluding Essex et al. 2013 (Small employer/self-employed, primips)   | 0.82 | (0.75-0.90) |                       |
| Excluding Essex et al. 2013 (Lower managerial/professional, multips)  | 0.83 | (0.75-0.92) |                       |
| Excluding Essex et al. 2013 (Intermediate, multips)                   | 0.83 | (0.76-0.92) |                       |
| Excluding Essex et al. 2013 (Small employer/self-employed, multips)   | 0.83 | (0.75-0.91) |                       |
| Excluding Patel et al. 2005 (Managerial/clerical)                     | 0.84 | (0.77-0.92) |                       |
| Excluding Patel et al. 2005 (Skilled non-manual)                      | 0.83 | (0.76-0.91) |                       |

J. Any Caesarean section

(i) Funnel plots

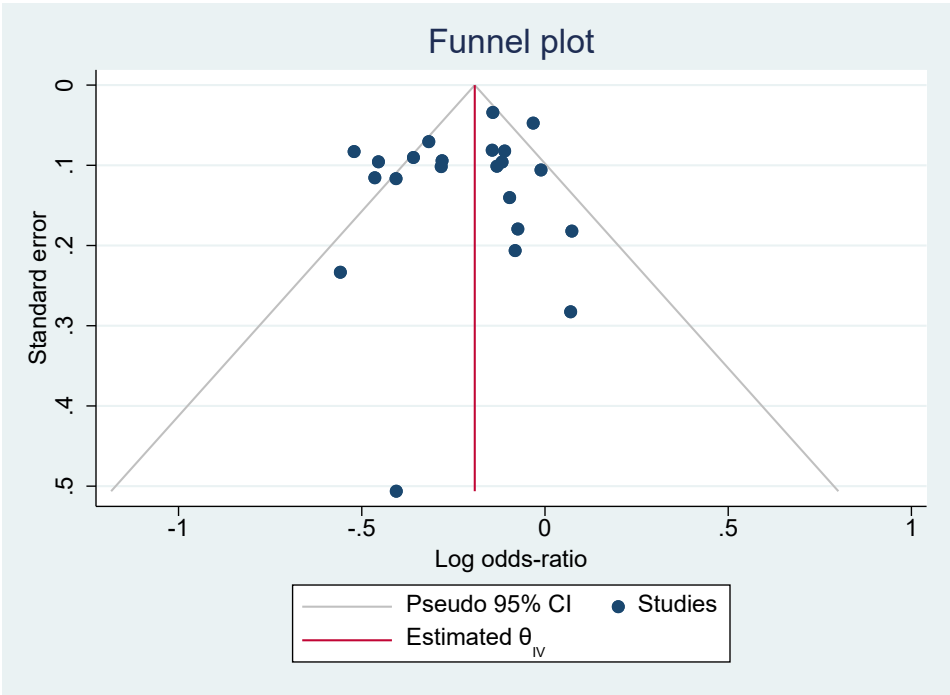

(ii) Eggers test of publication bias

H0: beta1 = 0; no small-study effects  
beta1 = 0.04  
SE of beta1 = 0.694  
z = 0.06  
Prob > |z| = 0.9487

## (iii) Meta regression

| Variable     | Number of studies | Meta-regression residual $I^2$ (%) | Coefficient | P value |
|--------------|-------------------|------------------------------------|-------------|---------|
| All studies  | 22                |                                    |             |         |
| Region       |                   |                                    |             |         |
| UK-wide      | 12                | 70.07%                             | -0.0006176  | p=0.984 |
| England      | 5                 |                                    |             |         |
| Ireland      | 5                 |                                    |             |         |
| Date of data |                   |                                    |             |         |
| <2000        | 5                 | 70.32%                             | -0.1330593  | p=0.264 |
| ≥2000        | 17                |                                    |             |         |
| Sample size  |                   |                                    |             |         |
| <2,000       | 6                 | 69.8%                              | 0.0194146   | p=0.738 |
| 2,000-5,999  | 11                |                                    |             |         |
| >6,000       | 5                 |                                    |             |         |

## (iv) Sensitivity analysis

| Lowest vs. Highest                                                 |             |                    |                              |
|--------------------------------------------------------------------|-------------|--------------------|------------------------------|
|                                                                    | OR          | 95% CI             |                              |
| <b>Overall effect size</b>                                         | <b>0.70</b> | <b>(0.65-0.76)</b> | <b>Significant reduction</b> |
| Excluding Brick et al. 2016 (SEG-D)                                | 0.70        | (0.63-0.77)        |                              |
| Excluding Brick et al. 2016 (Farmers)                              | 0.70        | (0.65-0.76)        |                              |
| Excluding Brick et al. 2016 (Unemployed)                           | 0.72        | (0.67-0.77)        | Weakest association          |
| Excluding Essex et al. 2013 (Lower supervisory/technical, primips) | 0.71        | (0.64-0.77)        |                              |
| Excluding Essex et al. 2013 (Semi-routine, primips)                | 0.71        | (0.65-0.78)        |                              |
| Excluding Essex et al. 2013 (Routine, primips)                     | 0.71        | (0.65-0.78)        |                              |
| Excluding Essex et al. 2013 (Lower supervisory/technical, multips) | 0.68        | (0.64-0.73)        | Strongest association        |
| Excluding Essex et al. 2013 (Semi-routine, multips)                | 0.70        | (0.64-0.77)        |                              |
| Excluding Essex et al. 2013 (Routine, multips)                     | 0.70        | (0.64-0.76)        |                              |
| Excluding Patel et al. 2005 (Skilled manual)                       | 0.71        | (0.65-0.77)        |                              |
| Excluding Patel et al. 2005 (Partly skilled)                       | 0.69        | (0.64-0.75)        |                              |
| Excluding Patel et al. 2005 (Unskilled)                            | 0.70        | (0.64-0.75)        |                              |

| Intermediate vs. Highest                                             |             |                    |                              |
|----------------------------------------------------------------------|-------------|--------------------|------------------------------|
|                                                                      | OR          | 95% CI             |                              |
| <b>Overall effect size</b>                                           | <b>0.90</b> | <b>(0.85-0.90)</b> | <b>Significant reduction</b> |
| Excluding Brick et al. 2016 (SEG-B)                                  | 0.87        | (0.83-0.92)        | Strongest association        |
| Excluding Brick et al. 2016 (SEG-C)                                  | 0.91        | (0.85-0.97)        | Weakest association          |
| Excluding Essex et al. 2013 (Lower managerial/professional, primips) | 0.90        | (0.85-0.96)        |                              |
| Excluding Essex et al. 2013 (Intermediate, primips)                  | 0.91        | (0.86-0.96)        |                              |
| Excluding Essex et al. 2013 (Small employer/self-employed, primips)  | 0.90        | (0.85-0.95)        | Weakest association          |
| Excluding Essex et al. 2013 (Lower managerial/professional, multips) | 0.90        | (0.85-0.95)        |                              |
| Excluding Essex et al. 2013 (Intermediate, multips)                  | 0.90        | (0.85-0.95)        |                              |
| Excluding Essex et al. 2013 (Small employer/self-employed, multips)  | 0.89        | (0.84-0.94)        |                              |
| Excluding Patel et al. 2005 (Managerial/clerical)                    | 0.89        | (0.85-0.94)        |                              |
| Excluding Patel et al. 2005 (Skilled non-manual)                     | 0.90        | (0.85-0.95)        |                              |

| Pooled                                                               | OR          | 95% CI             |                              |
|----------------------------------------------------------------------|-------------|--------------------|------------------------------|
| <b>Overall effect size</b>                                           | <b>0.80</b> | <b>(0.74-0.86)</b> | <b>Significant reduction</b> |
| Excluding Brick et al. 2016 (SEG-D)                                  | 0.81        | (0.74-0.87)        |                              |
| Excluding Brick et al. 2016 (Farmers)                                | 0.80        | (0.74-0.86)        |                              |
| Excluding Brick et al. 2016 (Unemployed)                             | 0.82        | (0.76-0.87)        | Weakest association          |
| Excluding Essex et al. 2013 (Lower supervisory/technical, primips)   | 0.81        | (0.75-0.87)        |                              |
| Excluding Essex et al. 2013 (Semi-routine, primips)                  | 0.81        | (0.75-0.87)        |                              |
| Excluding Essex et al. 2013 (Routine, primips)                       | 0.81        | (0.75-0.87)        |                              |
| Excluding Essex et al. 2013 (Lower supervisory/technical, multips)   | 0.80        | (0.74-0.86)        |                              |
| Excluding Essex et al. 2013 (Semi-routine, multips)                  | 0.81        | (0.75-0.87)        |                              |
| Excluding Essex et al. 2013 (Routine, multips)                       | 0.80        | (0.74-0.87)        |                              |
| Excluding Patel et al. 2005 (Skilled manual)                         | 0.81        | (0.75-0.87)        |                              |
| Excluding Patel et al. 2005 (Partly skilled)                         | 0.80        | (0.74-0.86)        |                              |
| Excluding Patel et al. 2005 (Unskilled)                              | 0.80        | (0.74-0.86)        |                              |
| Excluding Brick et al. 2016 (SEG-B)                                  | 0.80        | (0.73-0.85)        |                              |
| Excluding Brick et al. 2016 (SEG-C)                                  | 0.80        | (0.73-0.86)        |                              |
| Excluding Essex et al. 2013 (Lower managerial/professional, primips) | 0.80        | (0.74-0.86)        |                              |
| Excluding Essex et al. 2013 (Intermediate, primips)                  | 0.80        | (0.74-0.87)        |                              |
| Excluding Essex et al. 2013 (Small employer/self-employed, primips)  | 0.80        | (0.74-0.86)        |                              |
| Excluding Essex et al. 2013 (Lower managerial/professional, multips) | 0.79        | (0.73-0.86)        | Strongest association        |
| Excluding Essex et al. 2013 (Intermediate, multips)                  | 0.80        | (0.74-0.86)        |                              |
| Excluding Essex et al. 2013 (Small employer/self-employed, multips)  | 0.79        | (0.73-0.85)        | Strongest association        |
| Excluding Patel et al. 2005 (Managerial/clerical)                    | 0.79        | (0.74-0.86)        | Strongest association        |
| Excluding Patel et al. 2005 (Skilled non-manual)                     | 0.80        | (0.74-0.86)        |                              |

## Supplementary appendix S13: Quality of evidence assessed using GRADE for occupation/social class and adverse pregnancy outcomes

| Outcome             | Number of studies | Study design  | Quality assessments  |                      |              |                      |                      |                                  | Quality       |
|---------------------|-------------------|---------------|----------------------|----------------------|--------------|----------------------|----------------------|----------------------------------|---------------|
|                     |                   |               | Risk of bias         | Inconsistency        | Indirectness | Imprecision          | Publication bias     | Other <sup>1</sup>               |               |
| Stillbirth          | 5                 | Observational | Not serious          | Serious <sup>2</sup> | Not serious  | Not serious          | Serious <sup>3</sup> | Large effect <sup>4</sup>        | ⊕⊕⊕⊕ Very low |
| Neonatal mortality  | 3                 | Observational | Not serious          | Serious <sup>2</sup> | Not serious  | Not serious          | Not serious          | Large effect <sup>4</sup>        | ⊕⊕⊕⊕ Low      |
| Perinatal mortality | 3                 | Observational | Not serious          | Serious <sup>2</sup> | Not serious  | Not serious          | Not serious          | Large effect <sup>4</sup>        | ⊕⊕⊕⊕ Low      |
| Preterm birth       | 4                 | Observational | Serious <sup>5</sup> | Serious <sup>2</sup> | Not serious  | Not serious          | Not serious          | Confounding factors <sup>6</sup> | ⊕⊕⊕⊕ Very low |
| Maternal mortality  | 1                 | Observational | Not serious          | Not serious          | Not serious  | Serious <sup>7</sup> | Not serious          | Confounding factors <sup>8</sup> | ⊕⊕⊕⊕ Low      |
| Low birth weight    | 6                 | Observational | Not serious          | Serious <sup>2</sup> | Not serious  | Not serious          | Not serious          | Large effect <sup>4</sup>        | ⊕⊕⊕⊕ Low      |
| Caesarean delivery  | 4                 | Observational | Serious <sup>8</sup> | Serious <sup>2</sup> | Not serious  | Not serious          | Not serious          | Confounding factors <sup>9</sup> | ⊕⊕⊕⊕ Low      |

The quality of evidence was assessed using the GRADE approach.

Explanations: GRADE Working Group grades of evidence.

High quality: We are very confident that the true effect lies close to that of the estimate of the effect.

Moderate quality: We are moderately confident in the effect estimate: The true effect is likely to be close to the estimate of the effect, but there is a possibility that it is markedly different.

Low quality: Our confidence in the effect estimate is limited: The true effect may be markedly different from the estimate of the effect.

Very low quality: We have very little confidence in the effect estimate: The true effect is likely to be markedly different from the estimate of effect.

## Footnote:

<sup>1</sup> Observational studies starting at low can be upgraded based on 3 criteria: large effect, dose-response effect and “Effect of all plausible confounding factors would be to reduce the effect (where an effect is observed) or suggest a spurious effect (when no effect is observed)”.

<sup>2</sup> Downgraded for serious inconsistency: Heterogeneity was high for all meta-analyses and was not explained by any of the factors included in meta-regression.

<sup>3</sup> Downgraded for serious publication bias: Egger’s test and funnel plots showed significant effects of publication bias.

<sup>4</sup> Upgraded for large effect. Included studies represent large national datasets comprising all births – clear effect linking occupational inequalities (particularly lowest versus highest) to adverse pregnancy outcomes.

<sup>5</sup> Downgraded for serious risk of bias: The two larger studies were identified as having a moderate risk of bias according to the Newcastle-Ottawa scale.

<sup>6</sup> Upgraded for inclusion of all plausible confounding factors. Two of the four studies accounted for confounding variables, including the largest study (Fairley and Leyland 2006).

<sup>7</sup> Downgraded by one level due to imprecision: single small study comprising 3,458 participants.

<sup>8</sup> Downgraded for serious risk of bias: Two of the four studies were identified as having a moderate risk of bias according to the Newcastle-Ottawa scale.

<sup>9</sup> Upgraded for inclusion of all plausible confounding factors. Two of the four studies accounted for confounding variables (Essex et al. 2013 and Fairley et al. 2011).
